# Supplementary material for: Cytotoxic Alkylynols of the Sponge Cribrochalina vasculum: Structure, Synthetic Analogs and SAR Studies
Source: MDPI journal article supplement (doi:10.3390/md20040265), 2022-04-13

# Supplementary Material

## Cytotoxic Alkyllynols of the Sponge *Cribrochalina vasculum*: Structure, Synthetic Analogs and SAR Studies

Dimitry Kovalerchik<sup>1</sup>, Ana Zovko<sup>2</sup>, Petra Hääg<sup>2</sup>, Adam Sierakowiak<sup>2</sup>, Kristina Viktorsson<sup>2</sup>, Rolf Lewensohn<sup>2,3</sup> and Micha Ilan<sup>4</sup>, Shmuel Carmeli<sup>1,\*</sup>

<sup>1</sup> Raymond and Beverly Sackler Faculty of Exact Sciences, School of Chemistry, Tel Aviv University, Tel Aviv, 69978, Israel; kovaler310@gmail.com

<sup>2</sup> Department of Oncology-Pathology, Karolinska Institutet, SE-171 64, Solna, Sweden; zovko.ana@gmail.com (A.Z.); petra.haag@ki.se (P.H.); adam.sie.se@gmail.com (A.S.); kristina.viktorsson@ki.se (K.V.); rolf.lewensohn@ki.se (R.L.)

<sup>3</sup> Theme Cancer, Medical Unit Head and Neck, Lung and Skin Tumors, Thoracic Oncology Center, Karolinska University Hospital, SE-171 64, Solna, Sweden

<sup>4</sup> Department of Zoology, George S. Wise Faculty of Life Sciences, Tel Aviv University, Tel Aviv, 69978, Israel

\* Correspondence: carmeli@tauex.tau.ac.il; Tel.: +972-3-6408550

### Table of Content

| Page | Caption                                                                                                                                 |
|------|-----------------------------------------------------------------------------------------------------------------------------------------|
| 8    | Figure S1. <sup>1</sup> H NMR spectrum of (3 <i>R</i> )-18-methylnonadec-(4 <i>E</i> )-en-1-yn-3-ol ( <b>1</b> ) in CDCl <sub>3</sub>   |
|      | Figure S2. <sup>13</sup> C NMR spectrum of (3 <i>R</i> )-18-methylnonadec-(4 <i>E</i> )-en-1-yn-3-ol ( <b>1</b> ) in CDCl <sub>3</sub>  |
| 9    | Figure S3. HSQC spectrum of (3 <i>R</i> )-18-methylnonadec-(4 <i>E</i> )-en-1-yn-3-ol ( <b>1</b> ) in CDCl <sub>3</sub>                 |
|      | Figure S4. HMBC spectrum of (3 <i>R</i> )-18-methylnonadec-(4 <i>E</i> )-en-1-yn-3-ol ( <b>1</b> ) in CDCl <sub>3</sub>                 |
| 10   | Figure S5. COSY spectrum of (3 <i>R</i> )-18-methylnonadec-(4 <i>E</i> )-en-1-yn-3-ol ( <b>1</b> ) in CDCl <sub>3</sub>                 |
|      | Figure S6. DEPT spectrum of (3 <i>R</i> )-18-methylnonadec-(4 <i>E</i> )-en-1-yn-3-ol ( <b>1</b> ) in CDCl <sub>3</sub>                 |
| 11   | Table S1. NMR data of (3 <i>R</i> )-18-methylnonadec-(4 <i>E</i> )-en-1-yn-3-ol ( <b>1</b> ) in CDCl <sub>3</sub> .                     |
| 12   | Figure S7. GCMS spectrum of (3 <i>R</i> )-18-methylnonadec-(4 <i>E</i> )-en-1-yn-3-ol ( <b>1</b> )                                      |
|      | Figure S8. HRMS spectrum of (3 <i>R</i> )-18-methylnonadec-(4 <i>E</i> )-en-1-yn-3-ol ( <b>1</b> )                                      |
| 13   | Figure S9. <sup>1</sup> H NMR spectrum of (3 <i>R</i> )-14-methylnonadec-(4 <i>E</i> )-en-1-yn-3-ol ( <b>2</b> ) in CDCl <sub>3</sub>   |
|      | Figure S10. <sup>13</sup> C NMR spectrum of (3 <i>R</i> )-14-methylnonadec-(4 <i>E</i> )-en-1-yn-3-ol ( <b>2</b> ) in CDCl <sub>3</sub> |
| 14   | Figure S11. HSQC spectrum of (3 <i>R</i> )-14-methylnonadec-(4 <i>E</i> )-en-1-yn-3-ol ( <b>2</b> ) in CDCl <sub>3</sub>                |
|      | Figure S12. HMBC spectrum of (3 <i>R</i> )-14-methylnonadec-(4 <i>E</i> )-en-1-yn-3-ol ( <b>2</b> ) in CDCl <sub>3</sub>                |
| 15   | Figure S13. COSY spectrum of (3 <i>R</i> )-14-methylnonadec-(4 <i>E</i> )-en-1-yn-3-ol ( <b>2</b> ) in CDCl <sub>3</sub>                |
| 16   | Table S2. NMR data of (3 <i>R</i> )-14-methylnonadec-(4 <i>E</i> )-en-1-yn-3-ol ( <b>2</b> ) in CDCl <sub>3</sub>                       |
| 17   | Figure S14. GCMS spectrum of (3 <i>R</i> )-14-methylnonadec-(4 <i>E</i> )-en-1-yn-3-ol ( <b>2</b> )                                     |
| 18   | Figure S15. HRMS spectrum of (3 <i>R</i> )-14-methylnonadec-(4 <i>E</i> )-en-1-yn-3-ol ( <b>2</b> )                                     |
| 19   | Figure S16. <sup>1</sup> H NMR spectrum of 14-methylnonadec-(4 <i>E</i> )-en-1-yn-3-one ( <b>3</b> ) in CDCl <sub>3</sub>               |
|      | Figure S17. <sup>13</sup> C NMR spectrum of 14-methylnonadec-(4 <i>E</i> )-en-1-yn-3-one ( <b>3</b> ) in CDCl <sub>3</sub>              |
| 20   | Table S3. NMR data of 14-methylnonadec-(4 <i>E</i> )-en-1-yn-3-one ( <b>3</b> ) in CDCl <sub>3</sub>                                    |
| 21   | Figure S18. EIMS and fragmentation pattern of 14-methylnonadec-(4 <i>E</i> )-en-1-yn-3-one ( <b>3</b> )                                 |

|    |                                                                                                                                                        |
|----|--------------------------------------------------------------------------------------------------------------------------------------------------------|
| 22 | Figure S19. HRCIMS and fragmentation pattern of 14-methylnonadec-(4 <i>E</i> )-en-1-yn-3-one ( <b>3</b> )                                              |
| 23 | Figure S20. <sup>1</sup> H NMR spectrum of (3 <i>R</i> )-13,18-dimethylnonadec-(4 <i>E</i> )-en-1-yn-3-ol ( <b>4</b> ) in CDCl <sub>3</sub>            |
|    | Figure S21. <sup>13</sup> C NMR spectrum of (3 <i>R</i> )-13,18-dimethylnonadec-(4 <i>E</i> )-en-1-yn-3-ol ( <b>4</b> ) in CDCl <sub>3</sub>           |
| 24 | Table S4. NMR data of (3 <i>R</i> )-13,18-dimethylnonadec-(4 <i>E</i> )-en-1-yn-3-ol ( <b>4</b> ) in CDCl <sub>3</sub>                                 |
| 25 | Figure S22. Measured and calculated <sup>13</sup> C NMR data of (3 <i>R</i> )-13,18-dimethylnonadec-(4 <i>E</i> )-en-1-yn-3-ol ( <b>4</b> )            |
| 26 | Figure S23. EIMS and fragmentation pattern of (3 <i>R</i> )-13,18-dimethylnonadec-(4 <i>E</i> )-en-1-yn-3-ol ( <b>4</b> )                              |
| 27 | Figure S24. HRMS and fragmentation pattern of (3 <i>R</i> )-13,18-dimethylnonadec-(4 <i>E</i> )-en-1-yn-3-ol ( <b>4</b> )                              |
| 28 | Figure S25. <sup>1</sup> H NMR spectrum of (3 <i>R</i> )-14-methylicos-(4 <i>E</i> )-en-1-yn-3-ol ( <b>5</b> ) in CDCl <sub>3</sub>                    |
|    | Figure S26. <sup>13</sup> C NMR spectrum of (3 <i>R</i> )-14-methylicos-(4 <i>E</i> )-en-1-yn-3-ol ( <b>5</b> ) in CDCl <sub>3</sub>                   |
| 29 | Figure S27. HSQC spectrum of (3 <i>R</i> )-14-methylicos-(4 <i>E</i> )-en-1-yn-3-ol ( <b>5</b> ) in CDCl <sub>3</sub>                                  |
|    | Figure S28. HMBC spectrum of (3 <i>R</i> )-14-methylicos-(4 <i>E</i> )-en-1-yn-3-ol ( <b>5</b> ) in CDCl <sub>3</sub>                                  |
| 30 | Figure S29. COSY spectrum of (3 <i>R</i> )-14-methylicos-(4 <i>E</i> )-en-1-yn-3-ol ( <b>5</b> ) in CDCl <sub>3</sub>                                  |
| 31 | Table S5. NMR data of (3 <i>R</i> )-14-methylicos-(4 <i>E</i> )-en-1-yn-3-ol ( <b>5</b> ) in CDCl <sub>3</sub>                                         |
| 32 | Figure S30. EIMS and fragmentation pattern of (3 <i>R</i> )-14-methylicos-(4 <i>E</i> )-en-1-yn-3-ol ( <b>5</b> )                                      |
| 33 | Figure S31. HRMS and fragmentation pattern of (3 <i>R</i> )-14-methylicos-(4 <i>E</i> )-en-1-yn-3-ol ( <b>5</b> )                                      |
| 34 | Figure S32. <sup>1</sup> H NMR spectrum of 14-methylicos-(4 <i>E</i> )-en-1-yn-3-one ( <b>6</b> ) in CDCl <sub>3</sub>                                 |
|    | Figure S33. <sup>13</sup> C NMR spectrum of 14-methylicos-(4 <i>E</i> )-en-1-yn-3-one ( <b>6</b> ) in CDCl <sub>3</sub>                                |
| 35 | Table S6. NMR data of 14-methylicos-(4 <i>E</i> )-en-1-yn-3-one ( <b>6</b> ) in CDCl <sub>3</sub>                                                      |
| 36 | Figure S34. EIMS and fragmentation pattern of 14-methylicos-(4 <i>E</i> )-en-1-yn-3-one ( <b>6</b> )                                                   |
| 37 | Figure S35. HRCIMS and fragmentation pattern of 14-methylicos-(4 <i>E</i> )-en-1-yn-3-one ( <b>6</b> )                                                 |
| 38 | Figure S36. <sup>1</sup> H NMR spectrum of (3 <i>R</i> )-14-methylicos-1-yn-3-ol ( <b>7</b> ) in CDCl <sub>3</sub>                                     |
|    | Figure S37. <sup>13</sup> C NMR spectrum of (3 <i>R</i> )-14-methylicos-1-yn-3-ol ( <b>7</b> ) in CDCl <sub>3</sub>                                    |
| 39 | Figure S38. HSQC spectrum of (3 <i>R</i> )-14-methylicos-1-yn-3-ol ( <b>7</b> ) in CDCl <sub>3</sub>                                                   |
|    | Figure S39. HMBC spectrum of (3 <i>R</i> )-14-methylicos-1-yn-3-ol ( <b>7</b> ) in CDCl <sub>3</sub>                                                   |
| 40 | Figure S40. COSY spectrum of (3 <i>R</i> )-14-methylicos-1-yn-3-ol ( <b>7</b> ) in CDCl <sub>3</sub>                                                   |
|    | Figure S41. DEPT spectrum of (3 <i>R</i> )-14-methylicos-1-yn-3-ol ( <b>7</b> ) in CDCl <sub>3</sub>                                                   |
| 41 | Table S7. NMR data of (3 <i>R</i> )-14-methylicos-1-yn-3-ol ( <b>7</b> ) in CDCl <sub>3</sub>                                                          |
| 42 | Figure S42. EIMS and fragmentation pattern of (3 <i>R</i> )-14-methylicos-1-yn-3-ol ( <b>7</b> )                                                       |
|    | Figure S43. HRMS and fragmentation pattern of (3 <i>R</i> )-14-methylicos-1-yn-3-ol ( <b>7</b> )                                                       |
| 43 | Figure S44. <sup>1</sup> H NMR spectrum of (3 <i>R,E</i> )-12- <i>cis</i> -(2-hexylcyclopropyl)dodec-4-en-1-yn-3-ol ( <b>8</b> ) in CDCl <sub>3</sub>  |
|    | Figure S45. <sup>13</sup> C NMR spectrum of (3 <i>R,E</i> )-12- <i>cis</i> -(2-hexylcyclopropyl)dodec-4-en-1-yn-3-ol ( <b>8</b> ) in CDCl <sub>3</sub> |
| 44 | Figure S46. HSQC spectrum of (3 <i>R,E</i> )-12- <i>cis</i> -(2-hexylcyclopropyl)dodec-4-en-1-yn-3-ol ( <b>8</b> ) in CDCl <sub>3</sub>                |
|    | Figure S47. HMBC spectrum of (3 <i>R,E</i> )-12- <i>cis</i> -(2-hexylcyclopropyl)dodec-4-en-1-yn-3-ol ( <b>8</b> ) in CDCl <sub>3</sub>                |
| 45 | Figure S48. COSY spectrum of (3 <i>R,E</i> )-12- <i>cis</i> -(2-hexylcyclopropyl)dodec-4-en-1-yn-3-ol ( <b>8</b> ) in CDCl <sub>3</sub>                |
|    | Figure S49. DEPT spectrum of (3 <i>R,E</i> )-12- <i>cis</i> -(2-hexylcyclopropyl)dodec-4-en-1-yn-3-ol ( <b>8</b> ) in CDCl <sub>3</sub>                |
| 46 | Table S8. NMR data of (3 <i>R,E</i> )-12- <i>cis</i> -(2-hexylcyclopropyl)dodec-4-en-1-yn-3-ol ( <b>8</b> ) in CDCl <sub>3</sub>                       |
| 47 | Figure S50. Measured and calculated <sup>13</sup> C NMR data of (3 <i>R,E</i> )-12- <i>cis</i> -(2-hexylcyclopropyl)dodec-4-en-1-yn-3-ol ( <b>8</b> )  |
| 48 | Figure S51. EIMS of (3 <i>R,E</i> )-12- <i>cis</i> -(2-hexylcyclopropyl)dodec-4-en-1-yn-3-ol ( <b>8</b> )                                              |
|    | Figure S52. HRMS of (3 <i>R,E</i> )-12- <i>cis</i> -(2-hexylcyclopropyl)dodec-4-en-1-yn-3-ol ( <b>8</b> )                                              |

|    |                                                                                                                                                                                    |
|----|------------------------------------------------------------------------------------------------------------------------------------------------------------------------------------|
| 49 | Figure S53a. Proposed fragmentation pattern of the EIMS parent ion of (3 <i>R,E</i> )-12- <i>cis</i> -(2-hexylcyclopropyl)dodec-4-en-1-yn-3-ol ( <b>8</b> )                        |
|    | Figure S53b. Proposed fragmentation pattern of the EIMS water elimination product ion of (3 <i>R,E</i> )-12- <i>cis</i> -(2-hexylcyclopropyl)dodec-4-en-1-yn-3-ol ( <b>8</b> )     |
| 50 | Figure S54. <sup>1</sup> H NMR spectrum of (3 <i>R</i> )-13-methylhenicos-(4 <i>E</i> )-en-1-yn-3-ol ( <b>9</b> ) in CDCl <sub>3</sub>                                             |
|    | Figure S55. <sup>13</sup> C NMR spectrum of (3 <i>R</i> )-13-methylhenicos-(4 <i>E</i> )-en-1-yn-3-ol ( <b>9</b> ) in CDCl <sub>3</sub>                                            |
| 51 | Table S9. NMR data of (3 <i>R</i> )-13-methylhenicos-(4 <i>E</i> )-en-1-yn-3-ol ( <b>9</b> ) in CDCl <sub>3</sub>                                                                  |
| 52 | Figure S56. EIMS and fragmentation pattern of (3 <i>R</i> )-13-methylhenicos-(4 <i>E</i> )-en-1-yn-3-ol ( <b>9</b> )                                                               |
|    | Figure S57. HRMS of (3 <i>R</i> )-13-methylhenicos-(4 <i>E</i> )-en-1-yn-3-ol ( <b>9</b> )                                                                                         |
| 53 | Figure S58. <sup>1</sup> H NMR spectrum of docos-(4 <i>E</i> ,15 <i>Z</i> )-dien-1-yn-3-one ( <b>10</b> ) in CDCl <sub>3</sub>                                                     |
|    | Figure S59. <sup>13</sup> C NMR spectrum of docos-(4 <i>E</i> ,15 <i>Z</i> )-dien-1-yn-3-one ( <b>10</b> ) in CDCl <sub>3</sub>                                                    |
| 54 | Figure S60. HSQC spectrum of docos-(4 <i>E</i> ,15 <i>Z</i> )-dien-1-yn-3-one ( <b>10</b> ) in CDCl <sub>3</sub>                                                                   |
|    | Figure S61. HMBC spectrum of docos-(4 <i>E</i> ,15 <i>Z</i> )-dien-1-yn-3-one ( <b>10</b> ) in CDCl <sub>3</sub>                                                                   |
| 55 | Figure S62. COSY spectrum of docos-(4 <i>E</i> ,15 <i>Z</i> )-dien-1-yn-3-one ( <b>10</b> ) in CDCl <sub>3</sub>                                                                   |
| 56 | Table S10. NMR data of docos-(4 <i>E</i> ,15 <i>Z</i> )-dien-1-yn-3-one ( <b>10</b> ) in CDCl <sub>3</sub>                                                                         |
| 57 | Figure S63. EIMS and fragmentation pattern of docos-(4 <i>E</i> ,15 <i>Z</i> )-dien-1-yn-3-one ( <b>10</b> )                                                                       |
| 58 | Figure S64. LCMS chromatogram and mass spectrum of the periodate-permanganate oxidation products of docos-(4 <i>E</i> ,15 <i>Z</i> )-dien-1-yn-3-one ( <b>10</b> ).                |
| 59 | Figure S65. <sup>1</sup> H NMR spectrum of (3 <i>R</i> )-docos-(15 <i>Z</i> )- en-1-yn-3-ol ( <b>11</b> ) in CDCl <sub>3</sub>                                                     |
|    | Figure S66. <sup>13</sup> C NMR spectrum of (3 <i>R</i> )-docos-(15 <i>Z</i> )- en-1-yn-3-ol ( <b>11</b> ) in CDCl <sub>3</sub>                                                    |
| 60 | Table S11. NMR data of (3 <i>R</i> )-docos-(15 <i>Z</i> )- en-1-yn-3-ol ( <b>11</b> ) in CDCl <sub>3</sub>                                                                         |
| 61 | Figure S67. EIMS of (3 <i>R</i> )-docos-(15 <i>Z</i> )- en-1-yn-3-ol ( <b>11</b> )                                                                                                 |
| 62 | Figure S68. <sup>1</sup> H NMR spectrum of (3 <i>R</i> )-tetracos-(4 <i>E</i> ,15 <i>Z</i> )-dien-1-yn-3-ol ( <b>12</b> ) in CDCl <sub>3</sub>                                     |
|    | Figure S69. <sup>13</sup> C NMR spectrum of (3 <i>R</i> )-tetracos-(4 <i>E</i> ,15 <i>Z</i> )-dien-1-yn-3-ol ( <b>12</b> ) in CDCl <sub>3</sub>                                    |
| 63 | Figure S70. HSQC spectrum of (3 <i>R</i> )-tetracos-(4 <i>E</i> ,15 <i>Z</i> )-dien-1-yn-3-ol ( <b>12</b> ) in CDCl <sub>3</sub>                                                   |
|    | Figure S71. HMBC spectrum of (3 <i>R</i> )-tetracos-(4 <i>E</i> ,15 <i>Z</i> )-dien-1-yn-3-ol ( <b>12</b> ) in CDCl <sub>3</sub>                                                   |
| 64 | Figure S72. COSY spectrum of (3 <i>R</i> )-tetracos-(4 <i>E</i> ,15 <i>Z</i> )-dien-1-yn-3-ol ( <b>12</b> ) in CDCl <sub>3</sub>                                                   |
|    | Figure S73. DEPT spectrum of (3 <i>R</i> )-tetracos-(4 <i>E</i> ,15 <i>Z</i> )-dien-1-yn-3-ol ( <b>12</b> ) in CDCl <sub>3</sub>                                                   |
| 65 | Table S12. NMR data of (3 <i>R</i> )-tetracos-(4 <i>E</i> ,15 <i>Z</i> )-dien-1-yn-3-ol ( <b>12</b> ) in CDCl <sub>3</sub>                                                         |
| 66 | Figure S74. EIGCMS spectrum of (3 <i>R</i> )-tetracos-(4 <i>E</i> ,15 <i>Z</i> )-dien-1-yn-3-ol ( <b>12</b> )                                                                      |
| 67 | Figure S75. LCMS chromatogram and mass spectrum of the periodate-permanganate oxidation products of (3 <i>R</i> )-tetracos-(4 <i>E</i> ,15 <i>Z</i> )-dien-1-yn-3-ol ( <b>12</b> ) |
| 68 | Figure S76. <sup>1</sup> H NMR spectrum of (5 <i>S</i> )-icos-(3 <i>Z</i> )-en-1-yn-5-ol ( <b>13</b> ) in CDCl <sub>3</sub>                                                        |
|    | Figure S77. <sup>13</sup> C NMR spectrum of (5 <i>S</i> )-icos-(3 <i>Z</i> )-en-1-yn-5-ol ( <b>13</b> ) in CDCl <sub>3</sub>                                                       |
| 69 | Figure S78. HSQC spectrum of (5 <i>S</i> )-icos-(3 <i>Z</i> )-en-1-yn-5-ol ( <b>13</b> ) in CDCl <sub>3</sub>                                                                      |
|    | Figure S79. HMBC spectrum of (5 <i>S</i> )-icos-(3 <i>Z</i> )-en-1-yn-5-ol ( <b>13</b> ) in CDCl <sub>3</sub>                                                                      |
| 70 | Figure S80. COSY spectrum of (5 <i>S</i> )-icos-(3 <i>Z</i> )-en-1-yn-5-ol ( <b>13</b> ) in CDCl <sub>3</sub>                                                                      |
|    | Figure S81. DEPT spectrum of (5 <i>S</i> )-icos-(3 <i>Z</i> )-en-1-yn-5-ol ( <b>13</b> ) in CDCl <sub>3</sub>                                                                      |
| 71 | Table S13. NMR data of (5 <i>S</i> )-icos-(3 <i>Z</i> )-en-1-yn-5-ol ( <b>13</b> ) in CDCl <sub>3</sub>                                                                            |
|    | Figure S82. EIGCMS spectrum of (5 <i>S</i> )-icos-(3 <i>Z</i> )-en-1-yn-5-ol ( <b>13</b> )                                                                                         |
| 72 | Figure S83. HRCIMS spectrum of (5 <i>S</i> )-icos-(3 <i>Z</i> )-en-1-yn-5-ol ( <b>13</b> )                                                                                         |
| 73 | Figure S84. <sup>1</sup> H NMR spectrum of (5 <i>S</i> )-14-methylicos-(3 <i>Z</i> )-en-1-yn-5-ol ( <b>14</b> ) in CDCl <sub>3</sub>                                               |
|    | Figure S85. <sup>13</sup> C NMR spectrum of (5 <i>S</i> )-14-methylicos-(3 <i>Z</i> )-en-1-yn-5-ol ( <b>14</b> ) in CDCl <sub>3</sub>                                              |
| 74 | Figure S86. HSQC spectrum of (5 <i>S</i> )-14-methylicos-(3 <i>Z</i> )-en-1-yn-5-ol ( <b>14</b> ) in CDCl <sub>3</sub>                                                             |
|    | Figure S87. HMBC spectrum of (5 <i>S</i> )-14-methylicos-(3 <i>Z</i> )-en-1-yn-5-ol ( <b>14</b> ) in CDCl <sub>3</sub>                                                             |
| 75 | Figure S88. COSY spectrum of (5 <i>S</i> )-14-methylicos-(3 <i>Z</i> )-en-1-yn-5-ol ( <b>14</b> ) in CDCl <sub>3</sub>                                                             |

|    |                                                                                                                                                                                                                |
|----|----------------------------------------------------------------------------------------------------------------------------------------------------------------------------------------------------------------|
|    | Figure S89. DEPT spectrum of (5 <i>S</i> )-14-methylicos-(3 <i>Z</i> )-en-1-yn-5-ol ( <b>14</b> ) in CDCl <sub>3</sub>                                                                                         |
| 76 | Table S14. NMR data of (5 <i>S</i> )-14-methylicos-(3 <i>Z</i> )-en-1-yn-5-ol ( <b>14</b> ) in CDCl <sub>3</sub>                                                                                               |
| 77 | Figure S90. EIGCMS spectrum and fragmentation of (5 <i>S</i> )-14-methylicos-(3 <i>Z</i> )-en-1-yn-5-ol ( <b>14</b> )                                                                                          |
| 78 | Figure S91. HRCIMS spectrum of (5 <i>S</i> )-14-methylicos-(3 <i>Z</i> )-en-1-yn-5-ol ( <b>14</b> )                                                                                                            |
| 79 | Figure S92. <sup>1</sup> H NMR spectrum of (5 <i>S</i> )-18-methylicos-(3 <i>Z</i> )-en-1-yn-5-ol ( <b>15</b> ) and (5 <i>S</i> )-19-methylicos-(3 <i>Z</i> )-en-1-yn-5-ol ( <b>16</b> ) in CDCl <sub>3</sub>  |
|    | Figure S93. <sup>13</sup> C NMR spectrum of (5 <i>S</i> )-18-methylicos-(3 <i>Z</i> )-en-1-yn-5-ol ( <b>15</b> ) and (5 <i>S</i> )-19-methylicos-(3 <i>Z</i> )-en-1-yn-5-ol ( <b>16</b> ) in CDCl <sub>3</sub> |
| 80 | Figure S94. HSQC spectrum of (5 <i>S</i> )-18-methylicos-(3 <i>Z</i> )-en-1-yn-5-ol ( <b>15</b> ) and (5 <i>S</i> )-19-methylicos-(3 <i>Z</i> )-en-1-yn-5-ol ( <b>16</b> ) in CDCl <sub>3</sub>                |
|    | Figure S95. HMBC spectrum of (5 <i>S</i> )-18-methylicos-(3 <i>Z</i> )-en-1-yn-5-ol ( <b>15</b> ) and (5 <i>S</i> )-19-methylicos-(3 <i>Z</i> )-en-1-yn-5-ol ( <b>16</b> ) in CDCl <sub>3</sub>                |
| 81 | Figure S96. COSY spectrum of (5 <i>S</i> )-18-methylicos-(3 <i>Z</i> )-en-1-yn-5-ol ( <b>15</b> ) and (5 <i>S</i> )-19-methylicos-(3 <i>Z</i> )-en-1-yn-5-ol ( <b>16</b> ) in CDCl <sub>3</sub>                |
|    | Figure S97. DEPT spectrum of (5 <i>S</i> )-18-methylicos-(3 <i>Z</i> )-en-1-yn-5-ol ( <b>15</b> ) and (5 <i>S</i> )-19-methylicos-(3 <i>Z</i> )-en-1-yn-5-ol ( <b>16</b> ) in CDCl <sub>3</sub>                |
| 82 | Table S15. NMR data of (5 <i>S</i> )-18-methylicos-(3 <i>Z</i> )-en-1-yn-5-ol ( <b>15</b> ) in CDCl <sub>3</sub>                                                                                               |
|    | Table S16. NMR data of (5 <i>S</i> )-19-methylicos-(3 <i>Z</i> )-en-1-yn-5-ol ( <b>16</b> ) in CDCl <sub>3</sub>                                                                                               |
| 83 | Figure S98. EIGCMS spectrum of (5 <i>S</i> )-18-methylicos-(3 <i>Z</i> )-en-1-yn-5-ol ( <b>15</b> )                                                                                                            |
|    | Figure S99. EIGCMS spectrum of (5 <i>S</i> )-19-methylicos-(3 <i>Z</i> )-en-1-yn-5-ol ( <b>16</b> )                                                                                                            |
| 84 | Figure S100. HRCIMS spectrum of (5 <i>S</i> )-18-methylicos-(3 <i>Z</i> )-en-1-yn-5-ol ( <b>15</b> )                                                                                                           |
| 85 | Figure S100. HRCIMS spectrum of (5 <i>S</i> )-19-methylicos-(3 <i>Z</i> )-en-1-yn-5-ol ( <b>16</b> )                                                                                                           |
| 86 | Figure S102. <sup>1</sup> H NMR spectrum of 14-methyldocos-(3 <i>Z</i> )-en-1-yn-5,6-diol ( <b>17</b> ) in CDCl <sub>3</sub>                                                                                   |
|    | Figure S103. <sup>13</sup> C NMR spectrum of 14-methyldocos-(3 <i>Z</i> )-en-1-yn-5,6-diol ( <b>17</b> ) in CDCl <sub>3</sub>                                                                                  |
| 87 | Figure S104. HSQC spectrum of 14-methyldocos-(3 <i>Z</i> )-en-1-yn-5,6-diol ( <b>17</b> ) in CDCl <sub>3</sub>                                                                                                 |
|    | Figure S105. HMBC spectrum of 14-methyldocos-(3 <i>Z</i> )-en-1-yn-5,6-diol ( <b>17</b> ) in CDCl <sub>3</sub>                                                                                                 |
| 88 | Figure S106. COSY spectrum of 14-methyldocos-(3 <i>Z</i> )-en-1-yn-5,6-diol ( <b>17</b> ) in CDCl <sub>3</sub>                                                                                                 |
| 89 | Table S17. NMR data of 14-methyldocos-(3 <i>Z</i> )-en-1-yn-5,6-diol ( <b>17</b> ) in CDCl <sub>3</sub>                                                                                                        |
| 90 | Figure S107. EIMS and fragmentation pattern of 14-methyldocos-(3 <i>Z</i> )-en-1-yn-5,6-diol ( <b>17</b> )                                                                                                     |
| 91 | Figure S108. <sup>1</sup> H NMR spectrum of (3 <i>R</i> )-icos-(4 <i>E</i> )-en-1-yn-3-ol ( <b>18</b> ) in CDCl <sub>3</sub>                                                                                   |
|    | Figure S109. <sup>13</sup> C NMR spectrum of (3 <i>R</i> )-icos-(4 <i>E</i> )-en-1-yn-3-ol ( <b>18</b> ) in CDCl <sub>3</sub>                                                                                  |
| 92 | Figure S110. HSQC spectrum of (3 <i>R</i> )-icos-(4 <i>E</i> )-en-1-yn-3-ol ( <b>18</b> ) in CDCl <sub>3</sub>                                                                                                 |
|    | Figure S111. HMBC spectrum of (3 <i>R</i> )-icos-(4 <i>E</i> )-en-1-yn-3-ol ( <b>18</b> ) in CDCl <sub>3</sub>                                                                                                 |
| 93 | Figure S112. COSY spectrum of (3 <i>R</i> )-icos-(4 <i>E</i> )-en-1-yn-3-ol ( <b>18</b> ) in CDCl <sub>3</sub>                                                                                                 |
|    | Figure S113. DEPT spectrum of (3 <i>R</i> )-icos-(4 <i>E</i> )-en-1-yn-3-ol ( <b>18</b> ) in CDCl <sub>3</sub>                                                                                                 |
| 94 | Table S18. NMR data of (3 <i>R</i> )-icos-(4 <i>E</i> )-en-1-yn-3-ol ( <b>18</b> ) in CDCl <sub>3</sub>                                                                                                        |
| 95 | Figure S114. EIGCMS spectrum of (3 <i>R</i> )-icos-(4 <i>E</i> )-en-1-yn-3-ol ( <b>18</b> )                                                                                                                    |
|    | Figure S115. HRCIMS spectrum of (3 <i>R</i> )-icos-(4 <i>E</i> )-en-1-yn-3-ol ( <b>18</b> )                                                                                                                    |
| 96 | Figure S116. <sup>1</sup> H NMR spectrum of (3 <i>R</i> )-19-methylicos-(4 <i>E</i> )-en-1-yn-3-ol ( <b>19</b> ) in CDCl <sub>3</sub>                                                                          |
|    | Figure S117. <sup>13</sup> C NMR spectrum of (3 <i>R</i> )-19-methylicos-(4 <i>E</i> )-en-1-yn-3-ol ( <b>19</b> ) in CDCl <sub>3</sub>                                                                         |
| 97 | Table S19. NMR data of (3 <i>R</i> )-19-methylicos-(4 <i>E</i> )-en-1-yn-3-ol ( <b>19</b> ) in CDCl <sub>3</sub>                                                                                               |
|    | Figure S118. HRCIMS spectrum of (3 <i>R</i> )-19-methylicos-(4 <i>E</i> )-en-1-yn-3-ol ( <b>19</b> )                                                                                                           |
| 98 | Figure S119. <sup>1</sup> H NMR spectrum of (3 <i>R</i> )-henicos-(4 <i>E</i> )-en-1-yn-3-ol ( <b>20</b> ) in CDCl <sub>3</sub>                                                                                |
|    | Table S20. NMR data of (3 <i>R</i> )-henicos-(4 <i>E</i> )-en-1-yn-3-ol ( <b>20</b> ) in CDCl <sub>3</sub>                                                                                                     |
| 99 | Figure S120. EIGCMS spectrum of (3 <i>R</i> )-henicos-(4 <i>E</i> )-en-1-yn-3-ol ( <b>20</b> )                                                                                                                 |
|    | Figure S121. HRCIMS spectrum of (3 <i>R</i> )-henicos-(4 <i>E</i> )-en-1-yn-3-ol ( <b>20</b> )                                                                                                                 |



|     |                                                                                                                                                                                                                 |
|-----|-----------------------------------------------------------------------------------------------------------------------------------------------------------------------------------------------------------------|
| 100 | Figure S122. <sup>1</sup> H NMR spectrum of (3 <i>R</i> )-docos-(4 <i>E</i> ,15 <i>Z</i> )-dien-1-yn-3-ol ( <b>21</b> ) in CDCl <sub>3</sub>                                                                    |
|     | Figure S123. <sup>13</sup> C NMR spectrum of (3 <i>R</i> )-docos-(4 <i>E</i> ,15 <i>Z</i> )-dien-1-yn-3-ol ( <b>21</b> ) in CDCl <sub>3</sub>                                                                   |
| 101 | Table S21. NMR data of (3 <i>R</i> )-docos-(4 <i>E</i> ,15 <i>Z</i> )-dien-1-yn-3-ol ( <b>21</b> ) in CDCl <sub>3</sub>                                                                                         |
|     | Figure S124. EIGCMS spectrum of (3 <i>R</i> )-docos-(4 <i>E</i> ,15 <i>Z</i> )-dien-1-yn-3-ol ( <b>21</b> )                                                                                                     |
| 102 | Figure S125. <sup>1</sup> H NMR spectrum of (3 <i>R</i> )-21-methyldocos-(4 <i>E</i> ,15 <i>Z</i> )-dien-1-yn-3-ol ( <b>22</b> ) in CDCl <sub>3</sub>                                                           |
|     | Figure S126. <sup>13</sup> C NMR spectrum of (3 <i>R</i> )-21-methyldocos-(4 <i>E</i> ,15 <i>Z</i> )-dien-1-yn-3-ol ( <b>22</b> ) in CDCl <sub>3</sub>                                                          |
| 103 | Table S22. NMR data of (3 <i>R</i> )-21-methyldocos-(4 <i>E</i> ,15 <i>Z</i> )-dien-1-yn-3-ol ( <b>22</b> ) in CDCl <sub>3</sub>                                                                                |
|     | Figure S127. EIMS spectrum of (3 <i>R</i> )-21-methyldocos-(4 <i>E</i> ,15 <i>Z</i> )-dien-1-yn-3-ol ( <b>22</b> )                                                                                              |
| 104 | Figure S128. <sup>1</sup> H NMR spectrum of (3 <i>R</i> )-14-methyldocos-1-yn-3-ol ( <b>23</b> ) in CDCl <sub>3</sub>                                                                                           |
|     | Figure S129. <sup>13</sup> C NMR spectrum of (3 <i>R</i> )-14-methyldocos-1-yn-3-ol ( <b>23</b> ) in CDCl <sub>3</sub>                                                                                          |
| 105 | Table S23. NMR data of (3 <i>R</i> )-14-methyldocos-1-yn-3-ol ( <b>23</b> ) in CDCl <sub>3</sub>                                                                                                                |
| 106 | Figure S130. EIMS of (3 <i>R</i> )-14-methyldocos-1-yn-3-ol ( <b>23</b> )                                                                                                                                       |
| 107 | Figure S131. <sup>1</sup> H NMR spectrum of (4 <i>E</i> ,6 <i>E</i> )-docosa-4,6-dien-1-yn-3-ol ( <i>rac</i> - <b>27</b> ) in CDCl <sub>3</sub>                                                                 |
|     | Figure S132. <sup>13</sup> C NMR spectrum of (4 <i>E</i> ,6 <i>E</i> )-docosa-4,6-dien-1-yn-3-ol ( <i>rac</i> - <b>27</b> ) in CDCl <sub>3</sub>                                                                |
| 108 | Figure S133. HREIMS of (4 <i>E</i> ,6 <i>E</i> )-docosa-4,6-dien-1-yn-3-ol ( <i>rac</i> - <b>27</b> )                                                                                                           |
| 109 | Figure S134. <sup>1</sup> H NMR spectrum of ( <i>S</i> )-(( <i>R</i> )-icos-(4 <i>E</i> )-en-1-yn-3-yl)-3,3,3-trifluoro-2-methoxy-2-phenylpropanoate (( <i>S</i> , <i>R</i> )- <b>29</b> ) in CDCl <sub>3</sub> |
|     | Figure S135. <sup>1</sup> H NMR spectrum of ( <i>S</i> )-(( <i>S</i> )-icos-(4 <i>E</i> )-en-1-yn-3-yl)-3,3,3-trifluoro-2-methoxy-2-phenylpropanoate (( <i>S</i> , <i>S</i> )- <b>29</b> ) in CDCl <sub>3</sub> |
| 110 | Figure S136. <sup>1</sup> H NMR spectrum of dodec-1-yn-3-ol ( <i>rac</i> - <b>31</b> ) in CDCl <sub>3</sub>                                                                                                     |
|     | Figure S137. <sup>13</sup> C NMR spectrum of dodec-1-yn-3-ol ( <i>rac</i> - <b>31</b> ) in CDCl <sub>3</sub>                                                                                                    |
| 111 | Figure S138. HRCIMS of dodec-1-yn-3-ol ( <i>rac</i> - <b>31</b> )                                                                                                                                               |
| 112 | Figure S139. <sup>1</sup> H NMR spectrum of octadec-1-yn-3-ol ( <i>rac</i> - <b>32</b> ) in CDCl <sub>3</sub>                                                                                                   |
|     | Figure S140. <sup>13</sup> C NMR spectrum of octadec-1-yn-3-ol ( <i>rac</i> - <b>32</b> ) in CDCl <sub>3</sub>                                                                                                  |
| 113 | Figure S141. CIGCMS of octadec-1-yn-3-ol ( <i>rac</i> - <b>32</b> )                                                                                                                                             |
|     | Figure S142. HRCIMS of octadec-1-yn-3-ol ( <i>rac</i> - <b>32</b> )                                                                                                                                             |
| 114 | Figure S143. <sup>1</sup> H NMR spectrum of octadec-1-yn-3-ol ( <i>R</i> - <b>32</b> ) in CDCl <sub>3</sub>                                                                                                     |
|     | Figure S144. <sup>1</sup> H NMR spectrum of octadec-1-yn-3-ol ( <i>S</i> - <b>32</b> ) in CDCl <sub>3</sub>                                                                                                     |
| 115 | Figure S145. <sup>1</sup> H NMR spectrum of icos-1-yn-3-ol ( <i>rac</i> - <b>33</b> ) in CDCl <sub>3</sub>                                                                                                      |
|     | Figure S146. <sup>13</sup> C NMR spectrum of icos-1-yn-3-ol ( <i>rac</i> - <b>33</b> ) in CDCl <sub>3</sub>                                                                                                     |
| 116 | Figure S147. CIGCMS of icos-1-yn-3-ol ( <i>rac</i> - <b>33</b> )                                                                                                                                                |
|     | Figure S148. HRCIMS of icos-1-yn-3-ol ( <i>rac</i> - <b>33</b> )                                                                                                                                                |
| 117 | Figure S149. <sup>1</sup> H NMR spectrum of ( <i>R</i> )-(( <i>S</i> )-octadec-1-yn-3-yl)-3,3,3-trifluoro-2-methoxy-2-phenylpropanoate (( <i>R</i> , <i>S</i> )- <b>34</b> ) in CDCl <sub>3</sub>               |
|     | Figure S150. <sup>1</sup> H NMR spectrum of ( <i>R</i> )-(( <i>S</i> )-octadec-1-yn-3-yl)-3,3,3-trifluoro-2-methoxy-2-phenylpropanoate (( <i>R</i> , <i>S</i> )- <b>34</b> ) in CDCl <sub>3</sub>               |
| 118 | Figure S151. <sup>1</sup> H NMR spectrum of ( <i>R</i> )-(( <i>R</i> )-octadec-1-yn-3-yl)-3,3,3-trifluoro-2-methoxy-2-phenylpropanoate (( <i>R</i> , <i>R</i> )- <b>34</b> ) in CDCl <sub>3</sub>               |
|     | Figure S152. <sup>13</sup> C NMR spectrum of ( <i>R</i> )-(( <i>R</i> )-octadec-1-yn-3-yl)-3,3,3-trifluoro-2-methoxy-2-phenylpropanoate (( <i>R</i> , <i>R</i> )- <b>34</b> ) in CDCl <sub>3</sub>              |
| 119 | Figure S153. <sup>1</sup> H NMR spectrum of octadec-1-yn-3-yl 4-methylbenzenesulfonate ( <i>rac</i> - <b>35</b> ) in CDCl <sub>3</sub>                                                                          |
|     | Figure S154. <sup>13</sup> C NMR spectrum of octadec-1-yn-3-yl 4-methylbenzenesulfonate ( <i>rac</i> - <b>35</b> ) in CDCl <sub>3</sub>                                                                         |
| 120 | Figure S155. ESIMS of octadec-1-yn-3-yl 4-methylbenzenesulfonate ( <i>rac</i> - <b>35</b> )                                                                                                                     |
|     | Figure S156. HRESIMS of octadec-1-yn-3-yl 4-methylbenzenesulfonate ( <i>rac</i> - <b>35</b> )                                                                                                                   |
| 121 | Figure S157. <sup>1</sup> H NMR spectrum of 3-chlorooctadec-1-yne ( <i>rac</i> - <b>36</b> ) in CDCl <sub>3</sub>                                                                                               |

|     |                                                                                                                                                                                                                                                 |
|-----|-------------------------------------------------------------------------------------------------------------------------------------------------------------------------------------------------------------------------------------------------|
|     | Figure S158. $^{13}\text{C}$ NMR spectrum of 3-chlorooctadec-1-yne ( <i>rac</i> -36) in $\text{CDCl}_3$                                                                                                                                         |
| 122 | Figure S159. SMBEIMS of 3-chlorooctadec-1-yne ( <i>rac</i> -36)                                                                                                                                                                                 |
|     | Figure S160. HRESIMS of 3-chlorooctadec-1-yne ( <i>rac</i> -36)                                                                                                                                                                                 |
| 123 | Figure S161. $^1\text{H}$ NMR spectrum of octadec-1-yn-3-amine ( <i>rac</i> -37) in $\text{CDCl}_3$                                                                                                                                             |
|     | Figure S162. $^{13}\text{C}$ NMR spectrum of octadec-1-yn-3-amine ( <i>rac</i> -37) in $\text{CDCl}_3$                                                                                                                                          |
| 124 | Figure S163. ESIMS of octadec-1-yn-3-amine ( <i>rac</i> -37)                                                                                                                                                                                    |
|     | Figure S164. HRESIMS of octadec-1-yn-3-amine ( <i>rac</i> -37)                                                                                                                                                                                  |
| 125 | Figure S165. $^1\text{H}$ NMR spectrum of 3-methoxyoctadec-1-yne ( <i>rac</i> -38) in $\text{CDCl}_3$                                                                                                                                           |
|     | Figure S166. $^{13}\text{C}$ NMR spectrum of 3-methoxyoctadec-1-yne ( <i>rac</i> -38) in $\text{CDCl}_3$                                                                                                                                        |
| 126 | Figure S167. EIGCMS of 3-methoxyoctadec-1-yne ( <i>rac</i> -38)                                                                                                                                                                                 |
| 127 | Figure S168. $^1\text{H}$ NMR spectrum of <i>S</i> -octadec-1-yn-3-yl ethanethioate ( <i>rac</i> -39) in $\text{CDCl}_3$                                                                                                                        |
|     | Figure S169. $^{13}\text{C}$ NMR spectrum of <i>S</i> -octadec-1-yn-3-yl ethanethioate ( <i>rac</i> -39) in $\text{CDCl}_3$                                                                                                                     |
| 128 | Figure S170. ESIMS of <i>S</i> -octadec-1-yn-3-yl ethanethioate ( <i>rac</i> -39)                                                                                                                                                               |
| 129 | Figure S171. $^1\text{H}$ NMR spectrum of octadec-1-yn-3-thiol ( <i>rac</i> -40) in $\text{CDCl}_3$                                                                                                                                             |
|     | Figure S172. $^{13}\text{C}$ NMR spectrum of octadec-1-yn-3-thiol ( <i>rac</i> -40) in $\text{CDCl}_3$                                                                                                                                          |
| 130 | Figure S173. $^1\text{H}$ NMR spectrum of 3-methylnonadec-1-yn-3-ol ( <i>rac</i> -41) in $\text{CDCl}_3$                                                                                                                                        |
|     | Figure S174. $^{13}\text{C}$ NMR spectrum of 3-methylnonadec-1-yn-3-ol ( <i>rac</i> -41) in $\text{CDCl}_3$                                                                                                                                     |
| 131 | Figure S175. HRCIMS 3-methylnonadec-1-yn-3-ol ( <i>rac</i> -41)                                                                                                                                                                                 |
| 132 | Figure S176. $^1\text{H}$ NMR spectrum of heneicos-2-yn-4-ol ( <i>rac</i> -42) in $\text{CDCl}_3$                                                                                                                                               |
|     | Figure S177. $^{13}\text{C}$ NMR spectrum of heneicos-2-yn-4-ol ( <i>rac</i> -42) in $\text{CDCl}_3$                                                                                                                                            |
| 133 | Figure S178. HRCIMS heneicos-2-yn-4-ol ( <i>rac</i> -42)                                                                                                                                                                                        |
| 134 | Figure S179. $^1\text{H}$ NMR spectrum of 1-(3-tetradecylphenyl)prop-2-yn-1-ol ( <i>rac</i> -45) in $\text{CDCl}_3$                                                                                                                             |
|     | Figure S180. $^{13}\text{C}$ NMR spectrum of 1-(3-tetradecylphenyl)prop-2-yn-1-ol ( <i>rac</i> -45) in $\text{CDCl}_3$                                                                                                                          |
| 135 | Figure S181. HREIMS of 1-(3-tetradecylphenyl)prop-2-yn-1-ol ( <i>rac</i> -45)                                                                                                                                                                   |
| 136 | Figure S182. $^1\text{H}$ NMR spectrum of 1-(2-tetradecylphenyl)prop-2-yn-1-ol ( <i>rac</i> -48) in $\text{CDCl}_3$                                                                                                                             |
|     | Figure S183. $^{13}\text{C}$ NMR spectrum of 1-(2-tetradecylphenyl)prop-2-yn-1-ol ( <i>rac</i> -48) in $\text{CDCl}_3$                                                                                                                          |
| 137 | Figure S184. HREIMS of 1-(2-tetradecylphenyl)prop-2-yn-1-ol ( <i>rac</i> -48)                                                                                                                                                                   |
| 138 | Figure S185. $^1\text{H}$ NMR spectrum of 1-phenylprop-2-yn-1-ol ( <i>rac</i> -49) in $\text{CDCl}_3$                                                                                                                                           |
|     | Figure S186. $^{13}\text{C}$ NMR spectrum of 1-phenylprop-2-yn-1-ol ( <i>rac</i> -49) in $\text{CDCl}_3$                                                                                                                                        |
| 139 | Figure S187. HREIMS of 1-phenylprop-2-yn-1-ol ( <i>rac</i> -49)                                                                                                                                                                                 |
| 140 | Figure S188. Dose response curves of the compounds described in Table 1 obtained from screening of NSCLC U-1810 cells or diploid fibroblast WI-38 cells are presented. The $\text{IC}_{50}$ values were deduced from the cell viability curves. |

Figure S1.  $^1\text{H}$  NMR spectrum of (3*R*)-18-methylnonadec-(4*E*)-en-1-yn-3-ol (**1**) in  $\text{CDCl}_3$ .

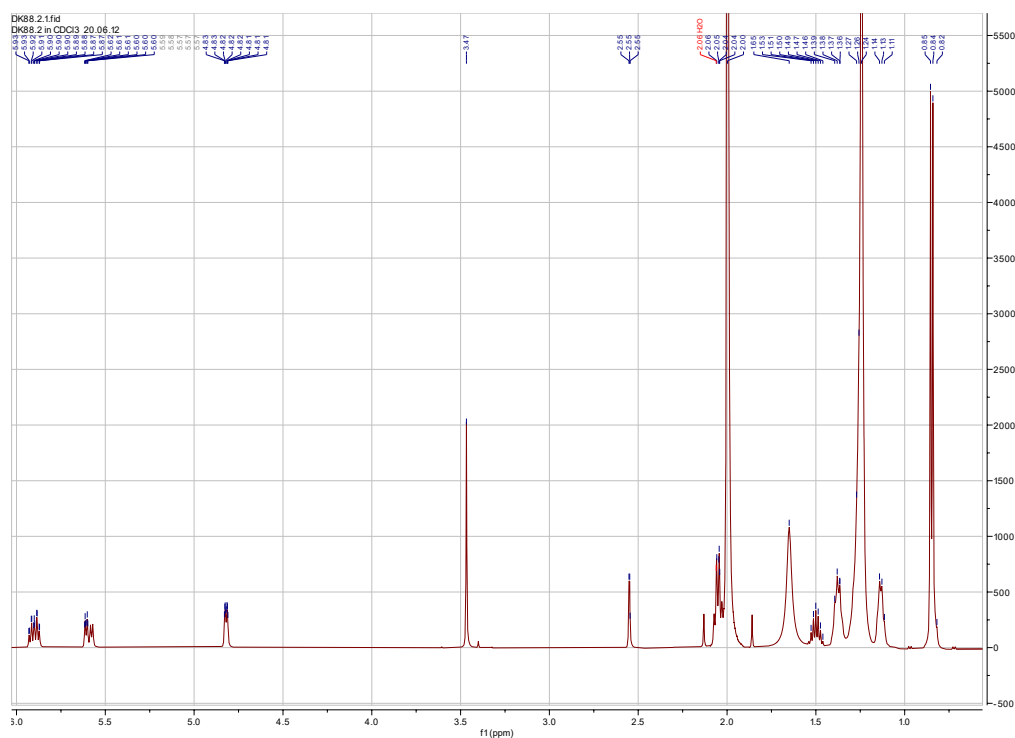

Figure S2.  $^{13}\text{C}$  NMR spectrum of (3*R*)-18-methylnonadec-(4*E*)-en-1-yn-3-ol (**1**) in  $\text{CDCl}_3$ .

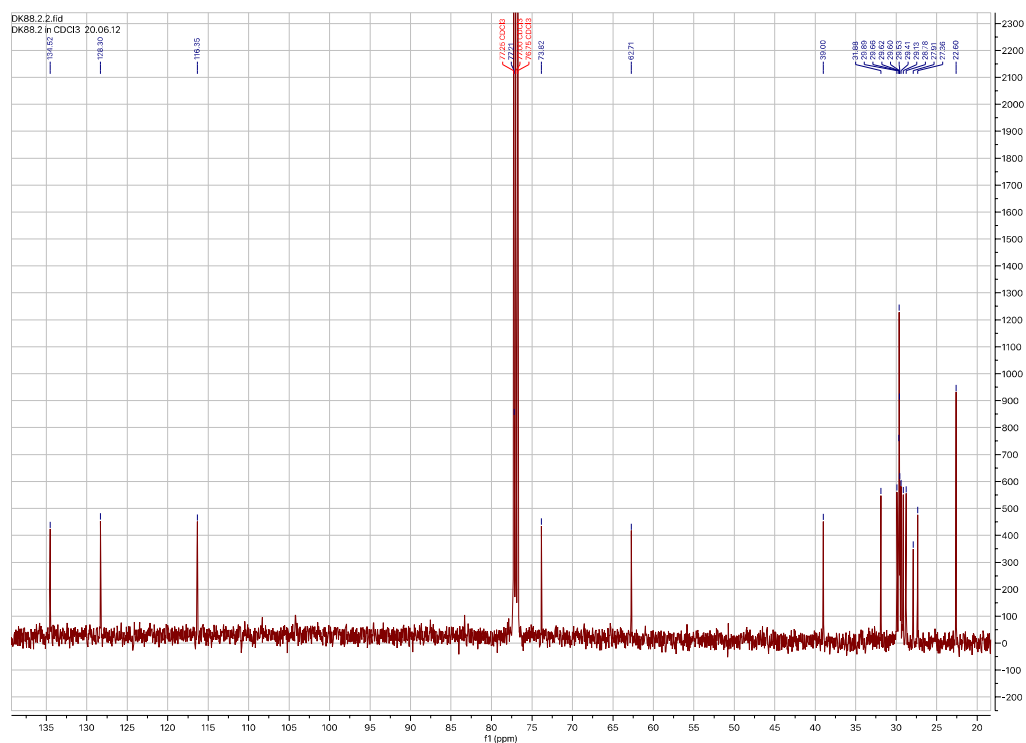

Figure S3. HSQC spectrum of (3*R*)-18-methylnonadec-(4*E*)-en-1-yn-3-ol (**1**) in CDCl<sub>3</sub>.

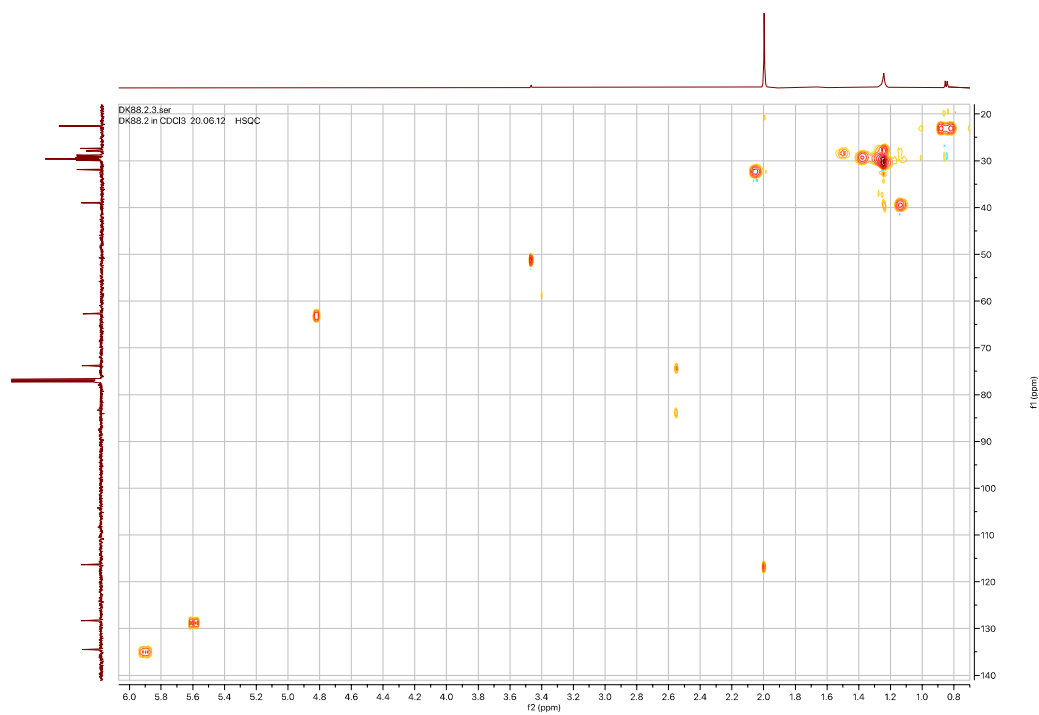

Figure S4. HMBC spectrum of (3*R*)-18-methylnonadec-(4*E*)-en-1-yn-3-ol (**1**) in CDCl<sub>3</sub>.

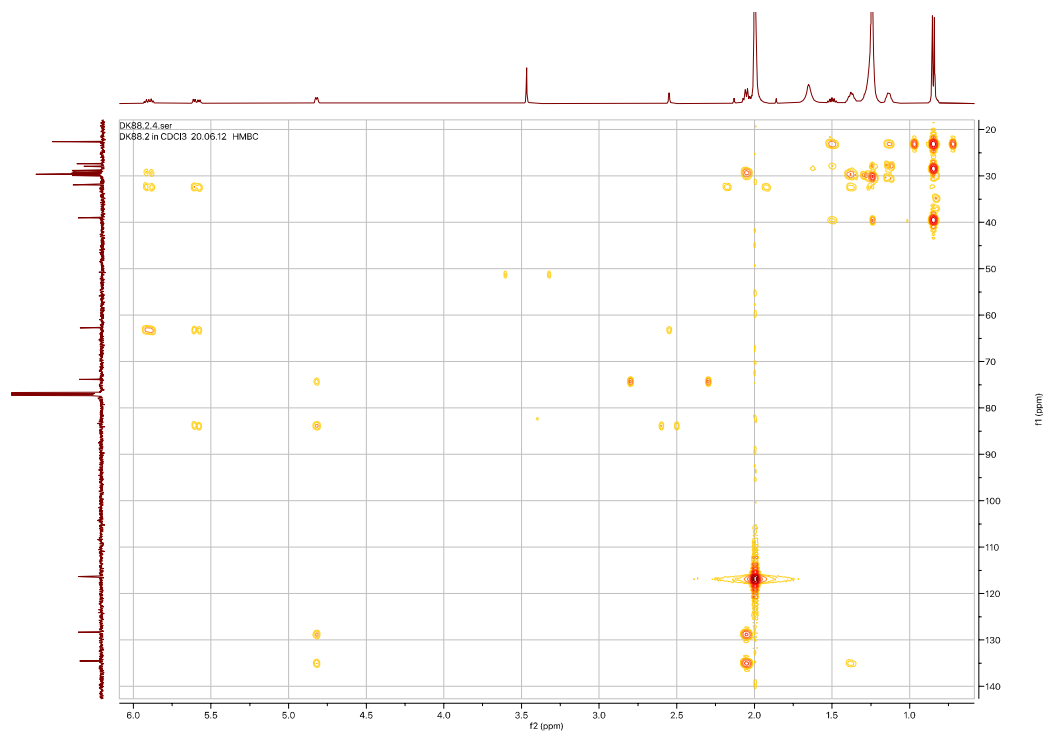

Figure S5. COSY spectrum of (3*R*)-18-methylnonadec-(4*E*)-en-1-yn-3-ol (**1**) in CDCl<sub>3</sub>.

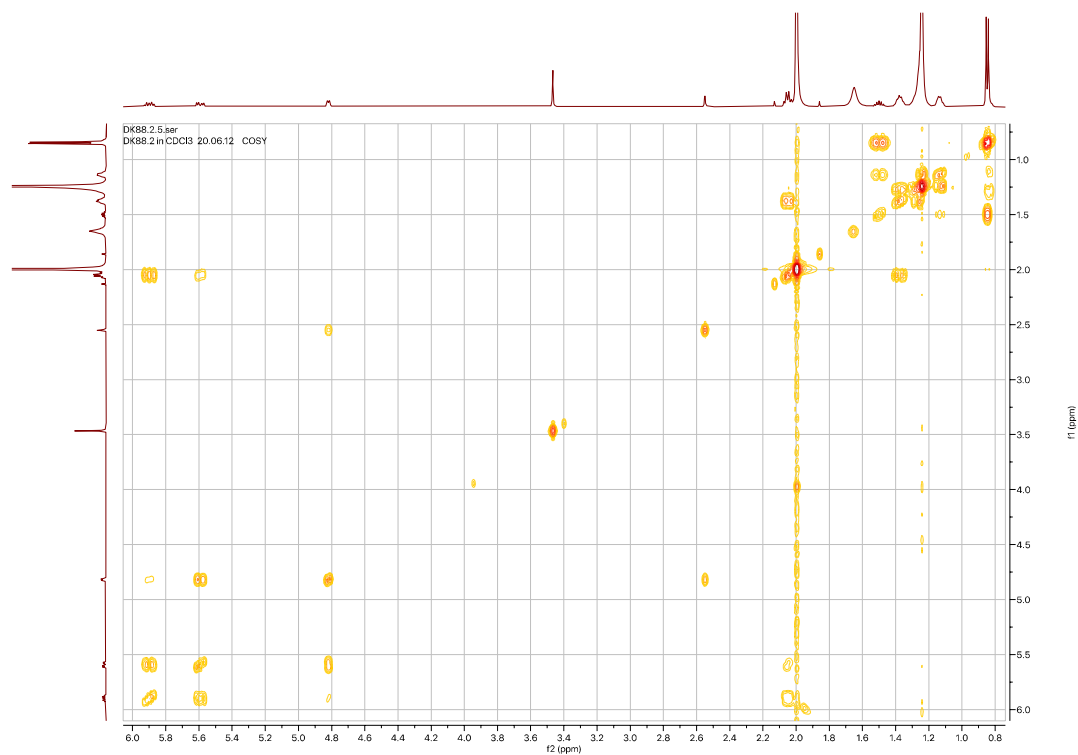

Figure S6. DEPT spectrum of (3*R*)-18-methylnonadec-(4*E*)-en-1-yn-3-ol (**1**) in CDCl<sub>3</sub>.

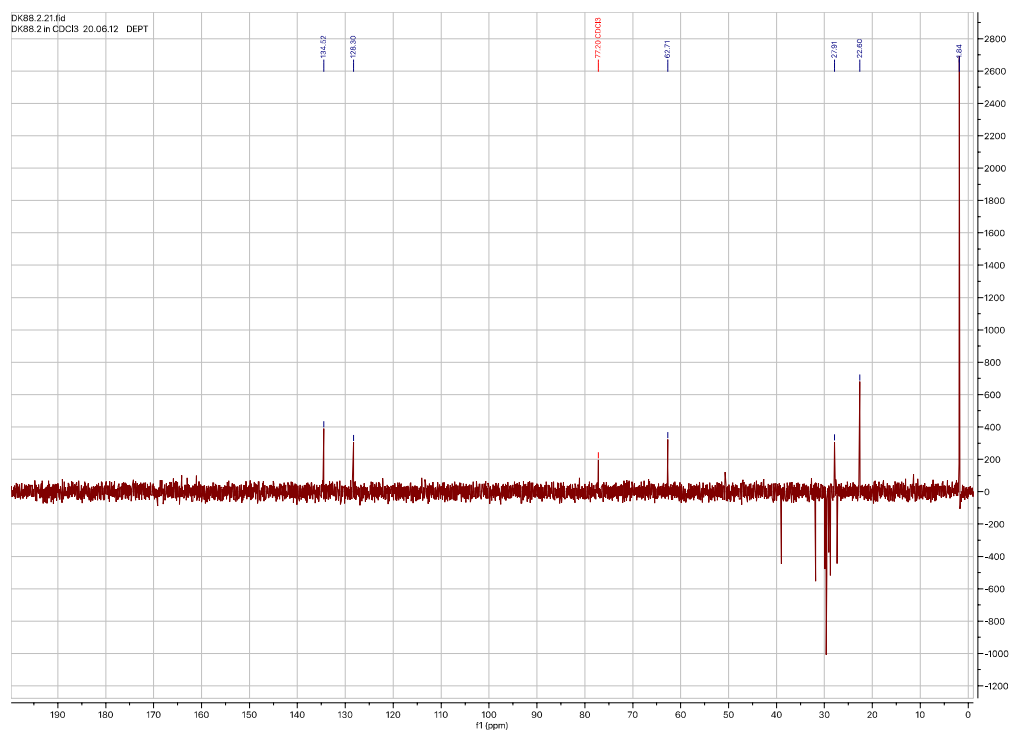

Table S1. NMR data of (3*R*)-18-methylnonadec-(4*E*)-en-1-yn-3-ol (**1**) in CDCl<sub>3</sub>.<sup>a</sup>

| Position | $\delta_{\text{C}}$ , mult. <sup>b</sup>      | $\delta_{\text{H}}$ , mult. $J$ (Hz) | LR H-C Correlations <sup>c</sup> |
|----------|-----------------------------------------------|--------------------------------------|----------------------------------|
| 1        | 73.8 <sup>d</sup> CH                          | 2.55 d (2.1)                         | 3                                |
| 2        | 83.3 <sup>e</sup> qC                          | -                                    | 1, 3, 4                          |
| 3        | 62.7 CH                                       | 4.82 d (6.0)                         | 1, 4, 5                          |
| 4        | 128.3 CH                                      | 5.59 dd (15.2, 6.0)                  | 3, 6                             |
| 5        | 134.5 CH                                      | 5.90 dt (15.2, 7.0)                  | 3, 6, 7                          |
| 6        | 31.9 CH <sub>2</sub>                          | 2.05 q (7.0)                         | 4, 5, 7, 8                       |
| 7        | 28.8 CH <sub>2</sub>                          | 1.38 m                               | 5, 6, 8                          |
| 8-15     | ~29.6 <sup>f</sup> 8 $\times$ CH <sub>2</sub> | 1.22 – 1.26 brm                      |                                  |
| 16       | 27.4 CH <sub>2</sub>                          | 1.24 m                               | 15, 17                           |
| 17       | 39.0 CH <sub>2</sub>                          | 1.13 m                               | 16, 18, 19, 20                   |
| 18       | 27.9 CH                                       | 1.50 qqt (6.5, 6.5, 6.5)             | 17, 19, 20                       |
| 19       | 22.6 CH <sub>3</sub>                          | 0.85 d (6.5)                         | 17, 18, 20                       |
| 20       | 22.6 CH <sub>3</sub>                          | 0.85 d (6.5)                         | 17, 18, 19                       |

<sup>a</sup>500.13 MHz for <sup>1</sup>H and 125.76 MHz for <sup>13</sup>C; <sup>b</sup>Multiplicity and assignment from HSQC experiment; <sup>c</sup>Determined from HMBC experiment; <sup>d</sup><sup>1</sup> $J$  = 250.0 Hz; <sup>e</sup><sup>2</sup> $J$  = 49.0 Hz; <sup>f</sup>Exact <sup>13</sup>C chemical shifts 29.13, 29.41, 29.62 ( $\times$  4), 29.66, 29.89 ppm.

Figure S7. GCMS spectrum of (3R)-18-methylnonadec-(4E)-en-1-yn-3-ol (1).

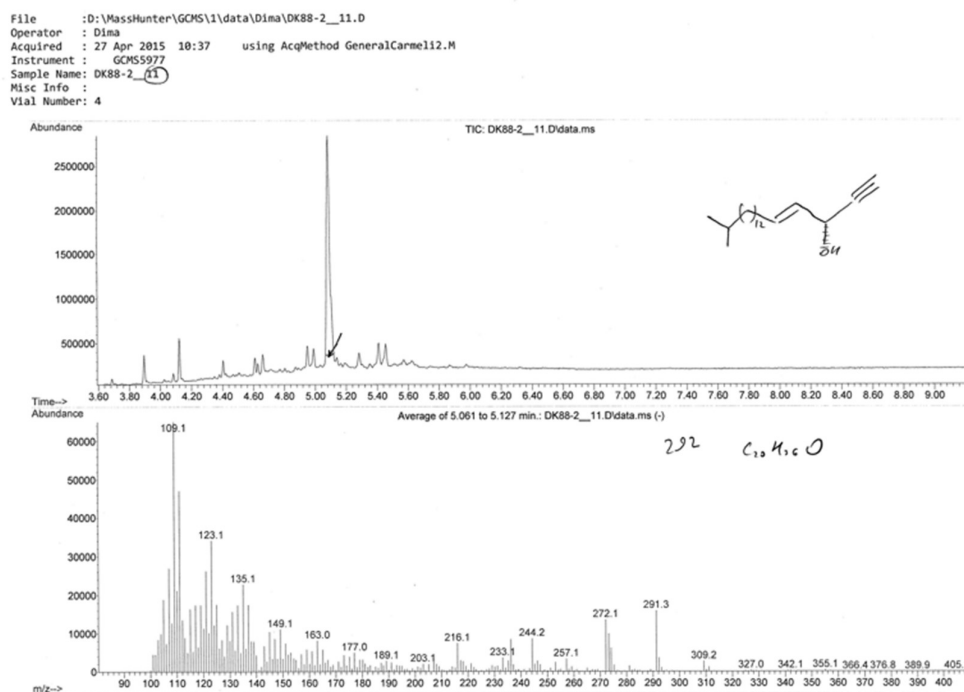

Figure S8. HRMS spectrum of (3R)-18-methylnonadec-(4E)-en-1-yn-3-ol (1).

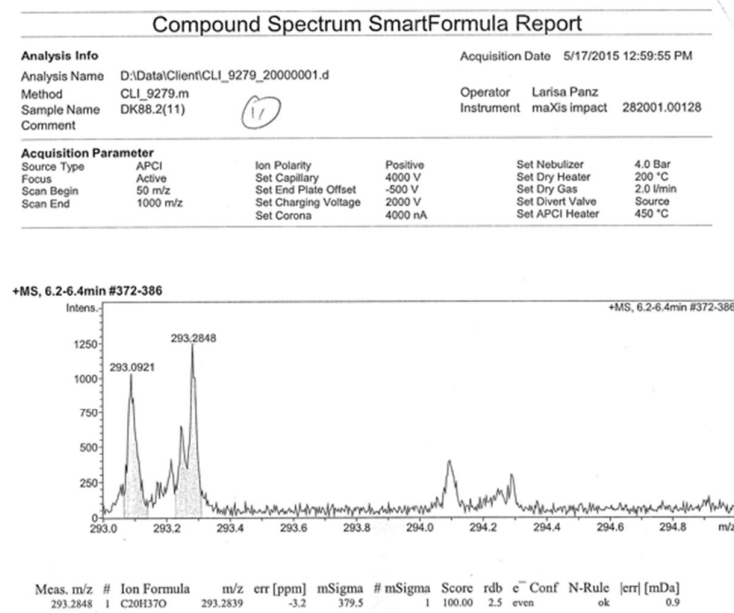

Figure S9.  $^1\text{H}$  NMR spectrum of (3*R*)-14-methylnonadec-(4*E*)-en-1-yn-3-ol (**2**) in  $\text{CDCl}_3$

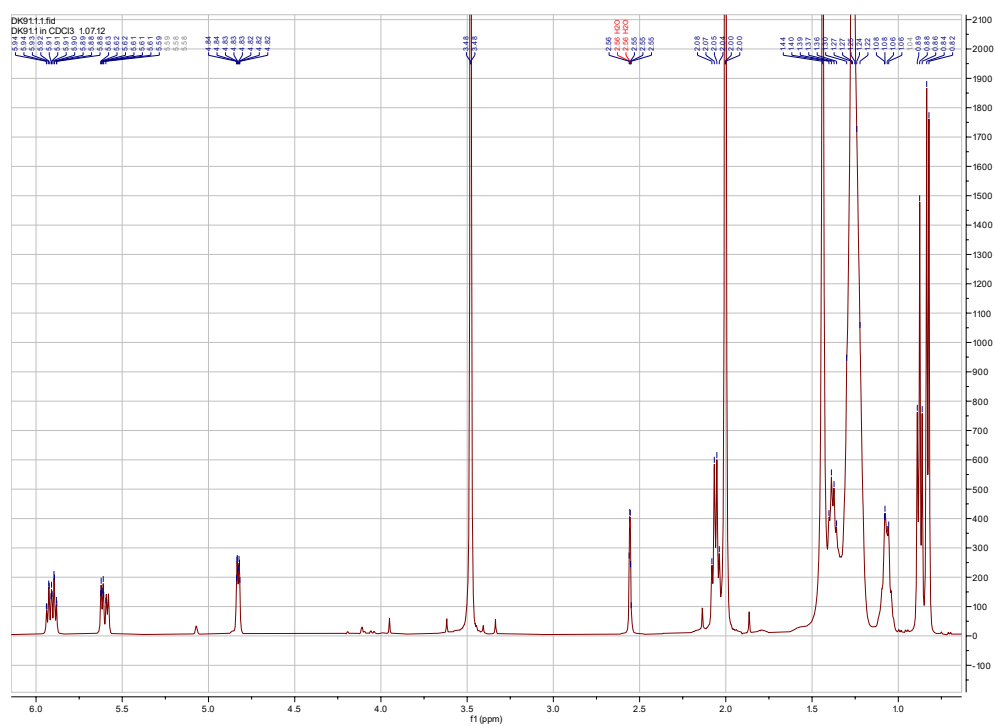

Figure S10.  $^{13}\text{C}$  NMR spectrum of (3*R*)-14-methylnonadec-(4*E*)-en-1-yn-3-ol (**2**) in  $\text{CDCl}_3$

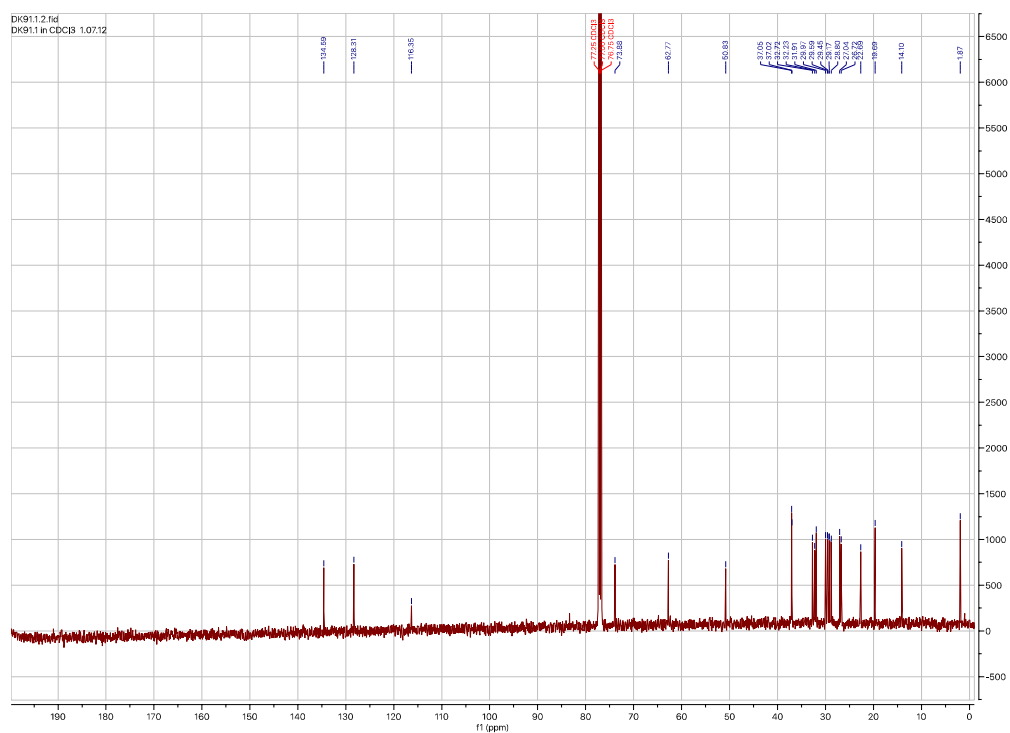



Figure S11. HSQC spectrum of (3*R*)-14-methylnonadec-(4*E*)-en-1-yn-3-ol (**2**) in CDCl<sub>3</sub>

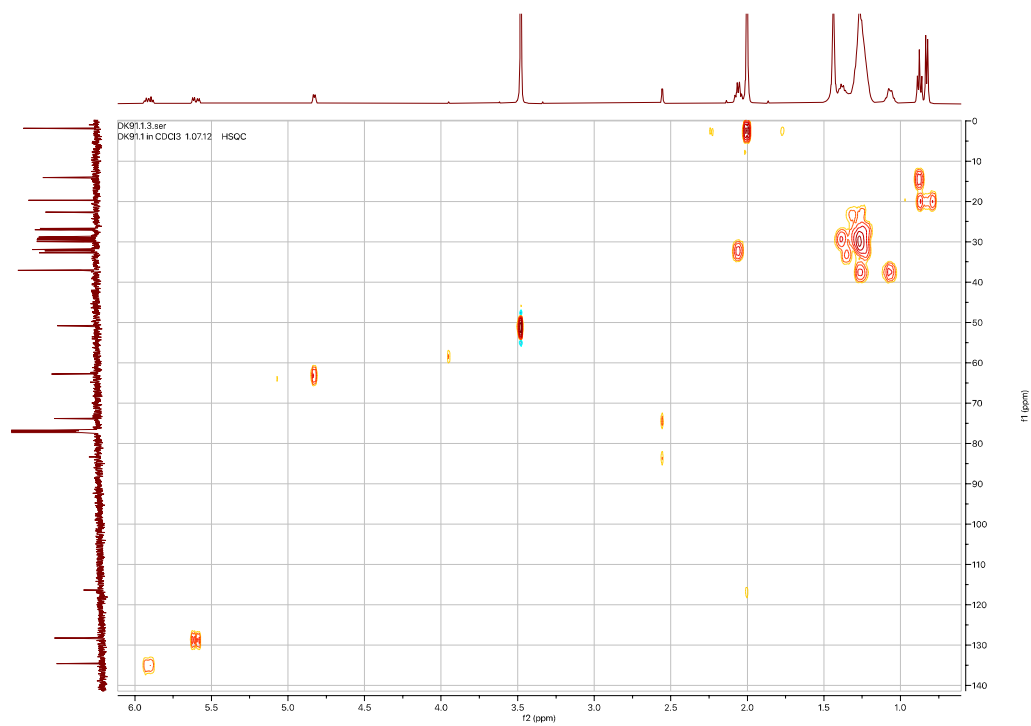

Figure S12. HMBC spectrum of (3*R*)-14-methylnonadec-(4*E*)-en-1-yn-3-ol (**2**) in CDCl<sub>3</sub>

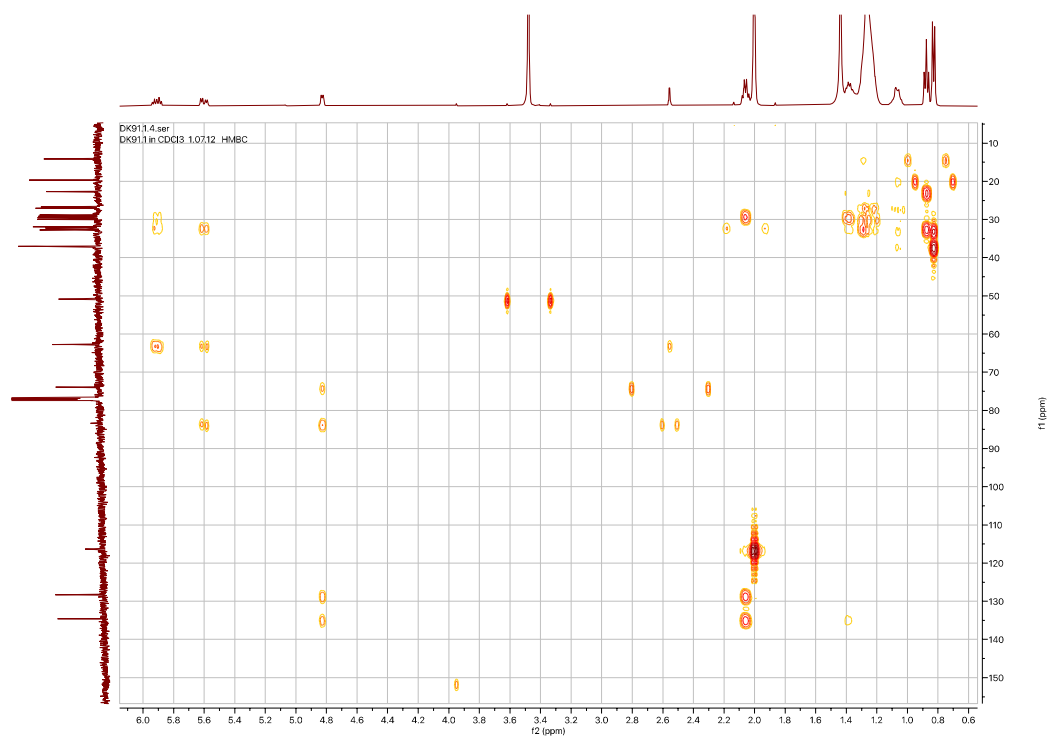

Figure S13. COSY spectrum of (3*R*)-14-methylnonadec-(4*E*)-en-1-yn-3-ol (**2**) in CDCl<sub>3</sub>

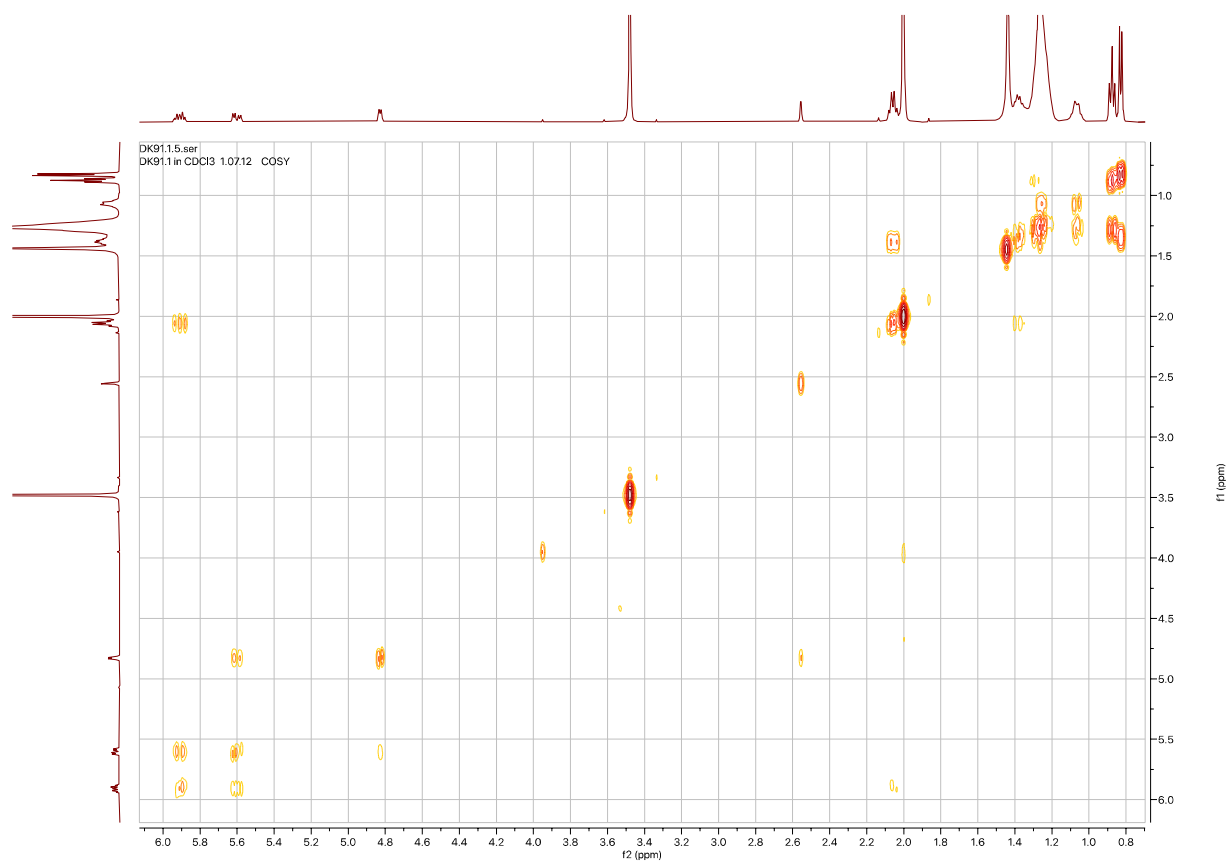

Table S2. NMR data of (3*R*)-14-methylnonadec-(4*E*)-en-1-yn-3-ol (**2**) in CDCl<sub>3</sub>.<sup>a</sup>

| Position | $\delta_{\text{C}}$ , mult. <sup>b</sup>      | $\delta_{\text{H}}$ , mult. $J$ (Hz) | LR H-C Correlations <sup>c</sup> |
|----------|-----------------------------------------------|--------------------------------------|----------------------------------|
| 1        | 73.9 <sup>d</sup> CH                          | 2.55 d (2.0)                         | 3                                |
| 2        | 83.4 <sup>e</sup> qC                          | -                                    | 1, 3, 4                          |
| 3        | 62.8 CH                                       | 4.82 d (5.7)                         | 1, 4, 5                          |
| 4        | 128.3 CH                                      | 5.60 dd (15.0, 5.7)                  | 3, 6                             |
| 5        | 134.5 CH                                      | 5.90 dt (15.0, 7.0)                  | 3, 6, 7                          |
| 6        | 31.9 CH <sub>2</sub>                          | 2.06 q (7.0)                         | 4, 5, 7, 8                       |
| 7        | 28.8 CH <sub>2</sub>                          | 1.36 m                               | 5, 6, 8                          |
| 8-11     | ~29.6 <sup>f</sup> 4 $\times$ CH <sub>2</sub> | 1.21 – 1.31 brm                      |                                  |
| 12       | 27.0 CH <sub>2</sub>                          | 1.23 m                               | 11, 13a, 13b                     |
| 13a      | 37.0 CH <sub>2</sub>                          | 1.25 m                               | 12, 14, 15a, 15b, 21             |
| b        |                                               | 1.06 m                               |                                  |
| 14       | 32.7 CH                                       | 1.37 m                               | 13a, 13b, 15a, 15a, 21           |
| 15a      | 37.0 CH <sub>2</sub>                          | 1.25 m                               | 13a, 13b, 14, 16, 21             |
| b        |                                               | 1.06 m                               |                                  |
| 16       | 26.7 CH <sub>2</sub>                          | 1.24 m                               | 15a, 15b, 17                     |
| 17       | 32.2 CH <sub>2</sub>                          | 1.24 m                               | 16, 18a, 18b, 19                 |
| 18a      | 22.7 CH <sub>2</sub>                          | 1.30 m                               | 17, 19                           |
| b        |                                               | 1.24 m                               |                                  |
| 19       | 14.1 CH <sub>3</sub>                          | 0.87 t (7.0)                         | 18a, 18b                         |
| 20       | 19.7 CH <sub>3</sub>                          | 0.83 d (7.0)                         | 13b, 15b                         |

<sup>a</sup>500.13 MHz for <sup>1</sup>H and 125.76 MHz for <sup>13</sup>C; <sup>b</sup>Multiplicity and assignment from HSQC experiment;<sup>c</sup>Determined from HMBC experiment; <sup>d</sup>  $^1J = 250.0$  Hz; <sup>e</sup>  $^2J = 48.8$  Hz; <sup>f</sup>Exact <sup>13</sup>C chemical shifts 29.17, 29.45, 29.59, 29.97 ppm.

Figure S14. GCMS spectrum of (3*R*)-14-methylnonadec-(4*E*)-en-1-yn-3-ol (2)

File :C:\MSDCHEM\1\DATA\SMB DATA 7\_11\Snapshot\AVIV1261.D  
Operator :  
Acquired : 12 Aug 2012 14:37 using AcqMethod SMB GC-MS Organics.M  
Instrument : GC-MSD  
Sample Name: Dima K 91.1  
Misc Info : Dima K 91.1  
Vial Number: 1

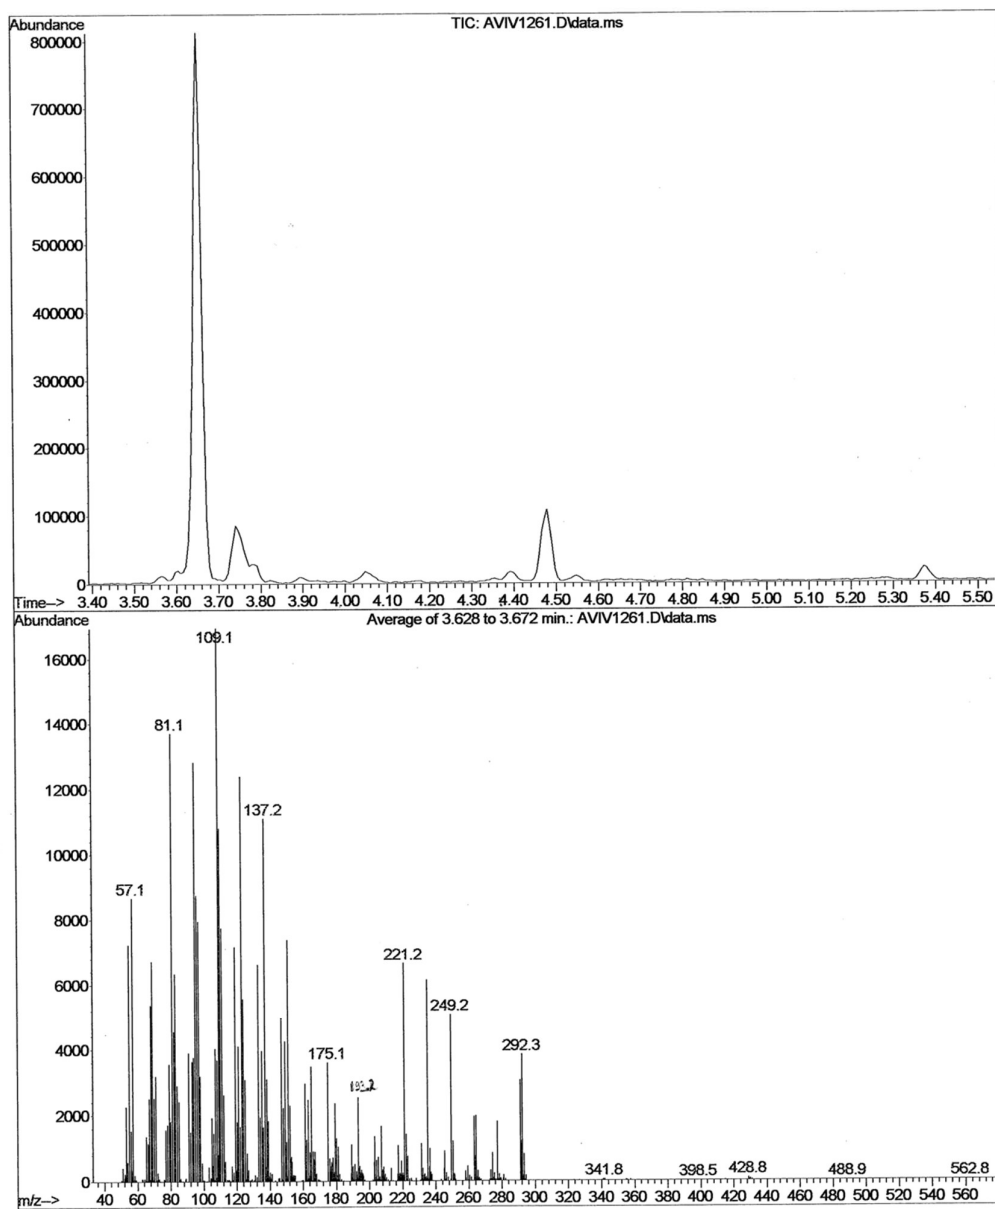

Figure S15. HRMS spectrum of (3*R*)-14-methylnonadec-(4*E*)-en-1-yn-3-ol (2)

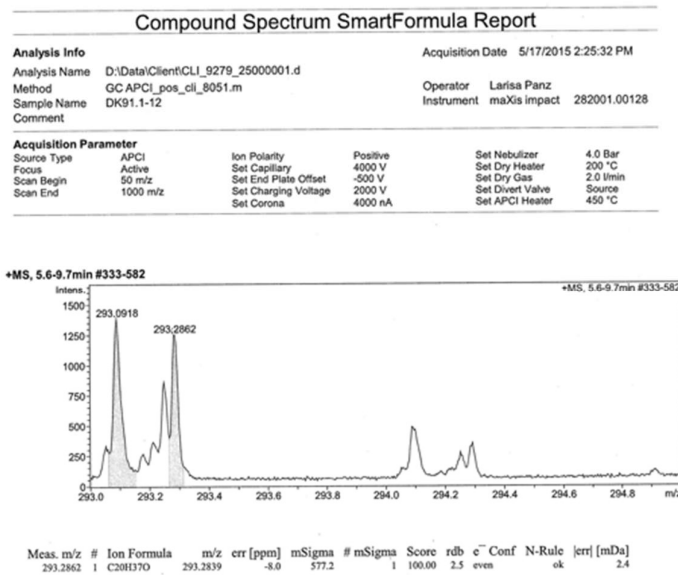

Figure S16.  $^1\text{H}$  NMR spectrum of 14-methylnonadec-(4*E*)-en-1-yn-3-one (**3**) in  $\text{CDCl}_3$

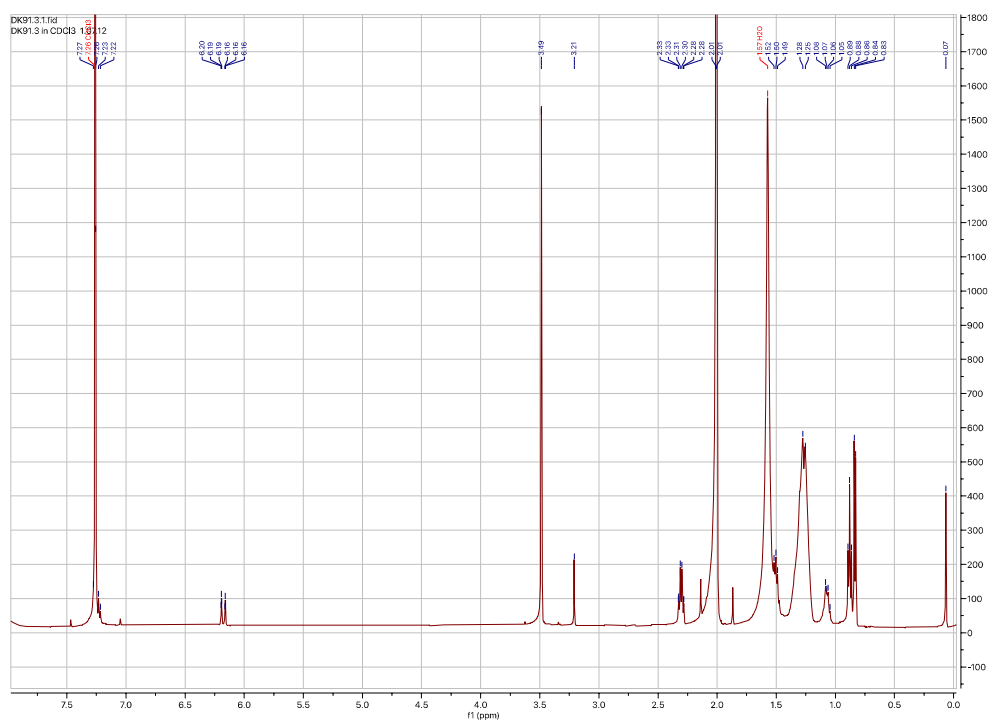

Figure S17.  $^{13}\text{C}$  NMR spectrum of 14-methylnonadec-(4*E*)-en-1-yn-3-one (**3**) in  $\text{CDCl}_3$

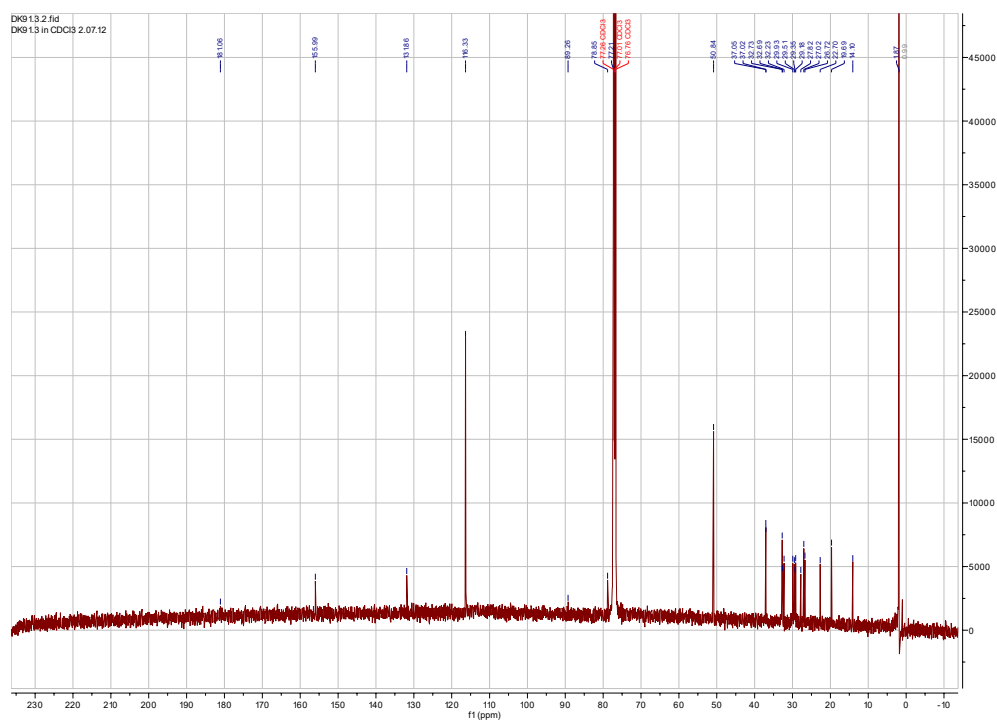

Table S3. NMR data of 14-methylnonadec-(4*E*)-en-1-yn-3-one (**3**) in CDCl<sub>3</sub>.<sup>a</sup>

| Position | $\delta_{\text{C}}$ , mult. <sup>b</sup>          | $\delta_{\text{H}}$ , mult. $J$ (Hz) | LR H-C Correlations <sup>c</sup> |
|----------|---------------------------------------------------|--------------------------------------|----------------------------------|
| 1        | 78.8 <sup>d</sup> CH                              | 3.20 s                               | -                                |
| 2        | 79.8 <sup>e</sup> qC                              | -                                    | 1, 4                             |
| 3        | 177.9 qC                                          | -                                    | 1, 4, 5                          |
| 4        | 131.9 CH                                          | 6.17 d (16.0)                        | 6                                |
| 5        | 156.0 CH                                          | 7.23 dt (16.0, 7.0)                  | 6, 7                             |
| 6        | 32.7 CH <sub>2</sub>                              | 2.30 q (7.0)                         | 4, 5, 7, 8                       |
| 7        | 27.8 CH <sub>2</sub>                              | 1.50 tt (7.0, 7.0)                   | 5, 6, 8                          |
| 8        | 29.2 CH <sub>2</sub>                              | 1.30 m                               |                                  |
| 9-11     | $\sim 29.6^{\text{f}}$ 3 $\times$ CH <sub>2</sub> | 1.23 – 1.31 brm                      |                                  |
| 12       | 27.0 CH <sub>2</sub>                              | 1.23 m                               | 11, 13a, 13b                     |
| 13a      | 37.0 CH <sub>2</sub>                              | 1.26 m                               | 12, 14, 15a, 15b, 21             |
| b        |                                                   | 1.07 m                               |                                  |
| 14       | 32.7 CH                                           | 1.37 m                               | 13a, 13b, 15a, 15a, 21           |
| 15a      | 37.0 CH <sub>2</sub>                              | 1.26 m                               | 13a, 13b, 14, 16, 21             |
| b        |                                                   | 1.07 m                               |                                  |
| 16       | 26.7 CH <sub>2</sub>                              | 1.25 m                               | 15a, 15b, 17                     |
| 17       | 32.2 CH <sub>2</sub>                              | 1.25 m                               | 16, 18a, 18b, 19                 |
| 18a      | 22.7 CH <sub>2</sub>                              | 1.31 m                               | 17, 19                           |
| b        |                                                   | 1.25 m                               |                                  |
| 19       | 14.1 CH <sub>3</sub>                              | 0.88 t (7.0)                         | 18a, 18b                         |
| 20       | 19.7 CH <sub>3</sub>                              | 0.83 d (7.0)                         | 13b, 15b                         |

<sup>a</sup>500.13 MHz for <sup>1</sup>H and 125.76 MHz for <sup>13</sup>C; <sup>b</sup>Multiplicity and assignment from HSQC experiment;<sup>c</sup>Determined from HMBC experiment; <sup>d</sup><sup>1</sup>*J* = 252.0 Hz <sup>e</sup><sup>2</sup>*J* = 48.0 Hz; <sup>f</sup>Exact <sup>13</sup>C chemical shifts 29.34, 29.51, 29.92 ppm.Figure S18. EIMS and fragmentation pattern of 14-methylnonadec-(4*E*)-en-1-yn-3-one (**3**).

File :D:\MassHunter\GCMS\1\data\Dim\DK91-3\_19.D  
 Operator : Dima  
 Acquired : 27 Apr 2015 10:25 using AcqMethod GeneralCame112.M  
 Instrument : GCMS5977  
 Sample Name: DK91-3\_19  
 Misc Info :  
 Vial Number: 3

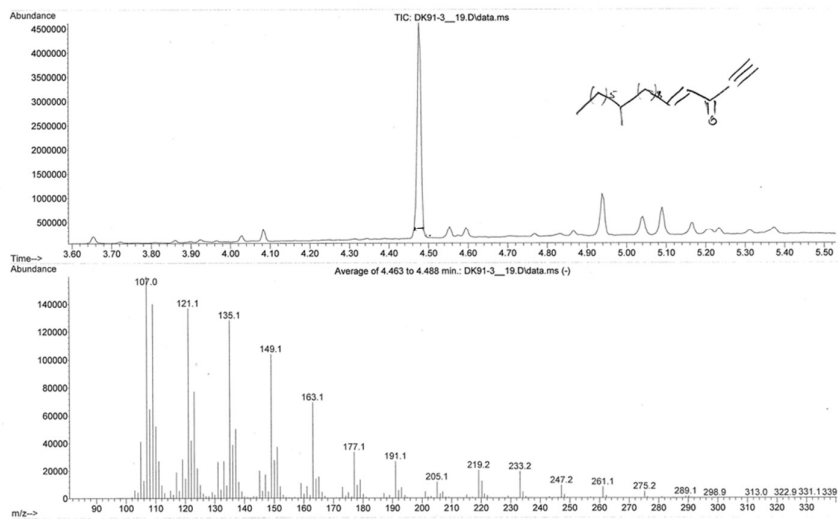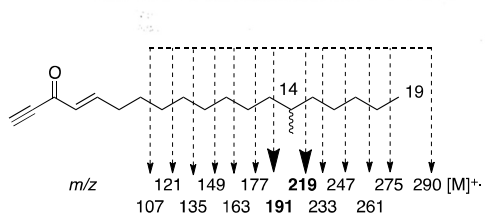



Figure S19. HRCIMS and fragmentation pattern of 14-methylnonadec-(4E)-en-1-yn-3-one (3)

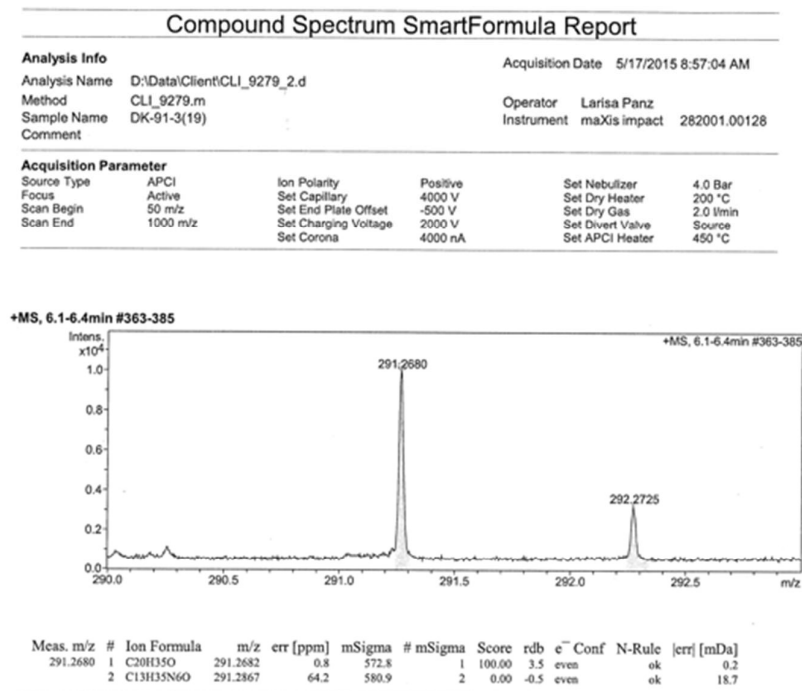

Figure S20.  $^1\text{H}$  NMR spectrum of (3*R*)-13,18-dimethylnonadec-(4*E*)-en-1-yn-3-ol (**4**) in  $\text{CDCl}_3$

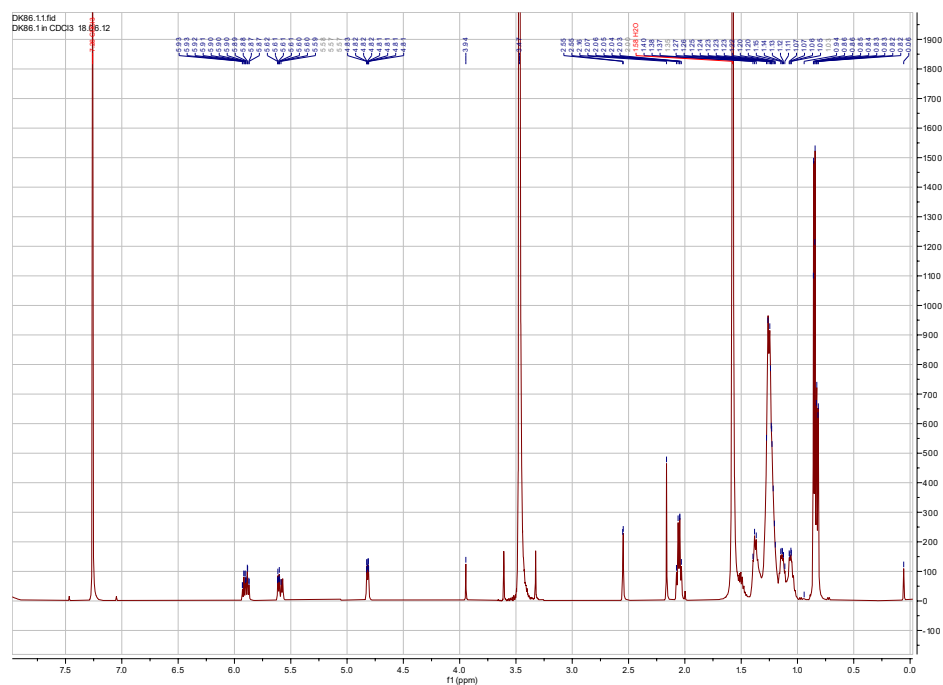

Figure S21.  $^{13}\text{C}$  NMR spectrum of (3*R*)-13,18-dimethylnonadec-(4*E*)-en-1-yn-3-ol (**4**) in  $\text{CDCl}_3$

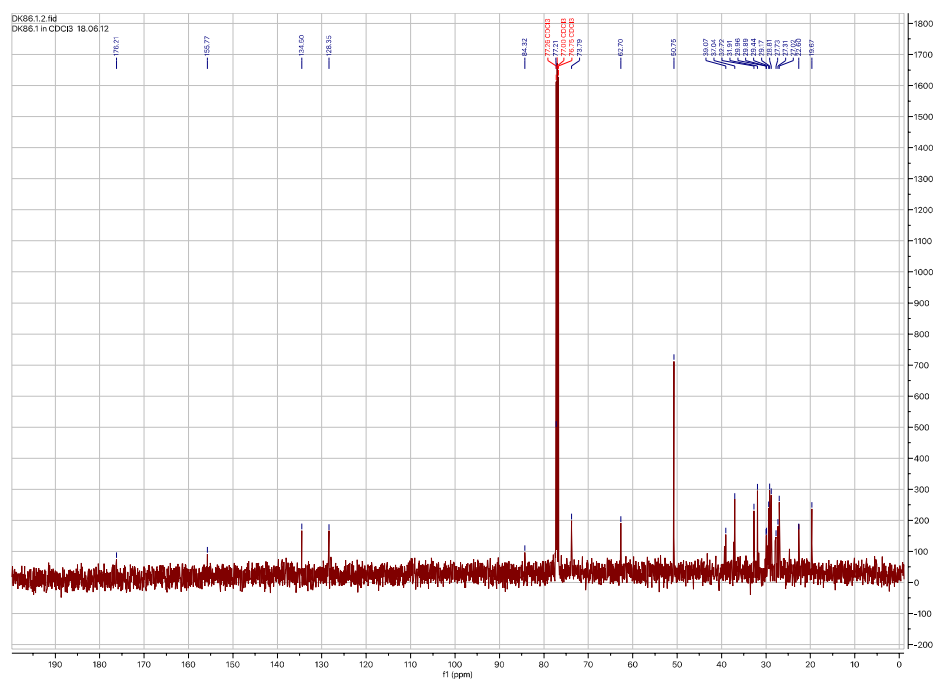

Table S4. NMR data of (3*R*)-13,18-dimethylnonadec-(4*E*)-en-1-yn-3-ol (**4**) in CDCl<sub>3</sub>.<sup>a</sup>

| Position | $\delta_{\text{C}}$ , mult. <sup>b</sup>      | $\delta_{\text{H}}$ , mult. $J$ (Hz) | LR H-C Correlations <sup>c</sup> |
|----------|-----------------------------------------------|--------------------------------------|----------------------------------|
| 1        | 73.8 <sup>d</sup> CH                          | 2.56 d (2.5)                         | 3                                |
| 2        | 83.3 <sup>e</sup> qC                          | -                                    | 1, 3, 4                          |
| 3        | 62.7 CH                                       | 4.82 brd (6.0)                       | 1, 4, 5                          |
| 4        | 128.3 CH                                      | 5.59 dd (15.0, 6.0)                  | 3, 6                             |
| 5        | 134.5 CH                                      | 5.90 dt (15.0, 7.5)                  | 3, 6, 7                          |
| 6        | 31.9 CH <sub>2</sub>                          | 2.05 q (7.0)                         | 4, 5, 7, 8                       |
| 7        | 28.8 CH <sub>2</sub>                          | 1.40 m                               | 5, 6, 8                          |
| 8-10     | ~29.6 <sup>f</sup> 3 $\times$ CH <sub>2</sub> | 1.23 – 1.26 brm                      |                                  |
| 11       | 27.0 CH <sub>2</sub>                          | 1.25 m                               | 10, 12a, 12b                     |
| 12a      | 37.0 CH <sub>2</sub>                          | 1.26 m                               | 11, 13, 14a, 14b, 21             |
| b        |                                               | 1.07 m                               |                                  |
| 13       | 32.7 CH                                       | 1.35 m                               | 12a, 12b, 14a, 14b, 21           |
| 14a      | 37.0 CH <sub>2</sub>                          | 1.26 m                               | 12a, 12b, 13, 15, 21             |
| b        |                                               | 1.07 m                               |                                  |
| 15       | 27.0 CH <sub>2</sub>                          | 1.25 m                               | 14a, 14b, 16                     |
| 16       | 27.7 CH <sub>2</sub>                          | 1.25 m                               | 15, 17                           |
| 17       | 39.3 CH <sub>2</sub>                          | 1.15 m                               | 16, 18, 19, 20                   |
| 18       | 27.9 CH                                       | 1.51 m                               | 17, 19, 20                       |
| 19       | 22.6 CH <sub>3</sub>                          | 0.86 d (7.0)                         | 17, 18, 20                       |
| 20       | 22.6 CH <sub>3</sub>                          | 0.86 d (7.0)                         | 17, 18, 19                       |
| 21       | 19.7 CH <sub>3</sub>                          | 0.82 d (6.5)                         | 12b, 14b                         |

<sup>a</sup>500.13 MHz for <sup>1</sup>H and 125.76 MHz for <sup>13</sup>C; <sup>b</sup>Multiplicity and assignment from HSQC experiment;<sup>c</sup>Determined from HMBC experiment; <sup>d</sup><sup>1</sup> $J$  = 250.0 Hz; <sup>e</sup><sup>2</sup> $J$  = 49.0 Hz; <sup>f</sup>Exact <sup>13</sup>C chemical shifts 29.16, 29.44, 29.45 ppm.

Figure S22. Measured and calculated  $^{13}\text{C}$  NMR data of (3*R*)-13,18-dimethylnonadec-(4*E*)-en-1-yn-3-ol (**4**).

Measured

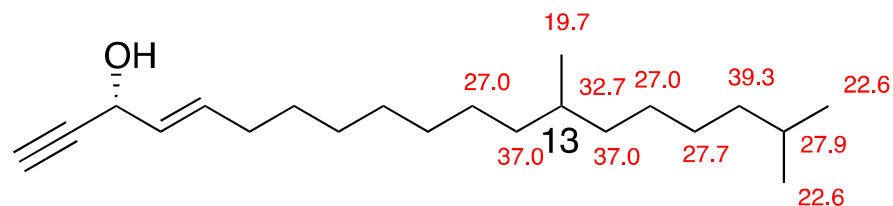

Calculated

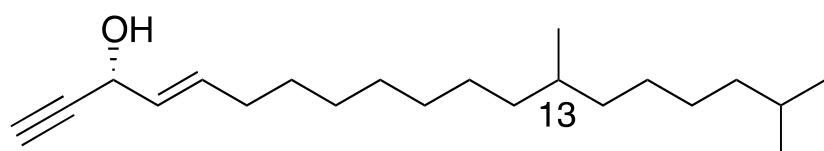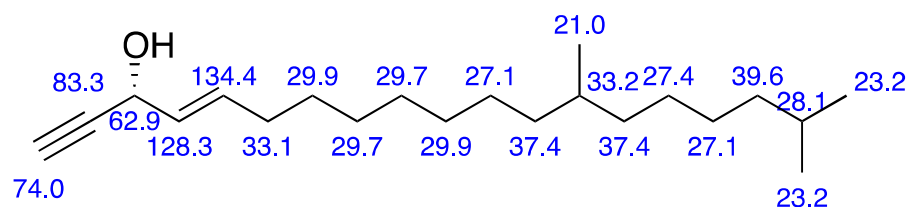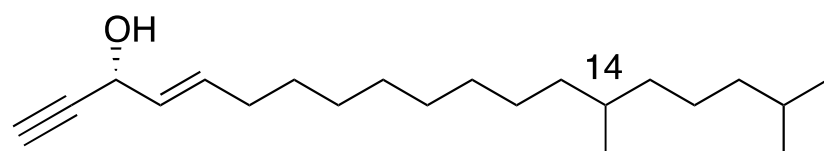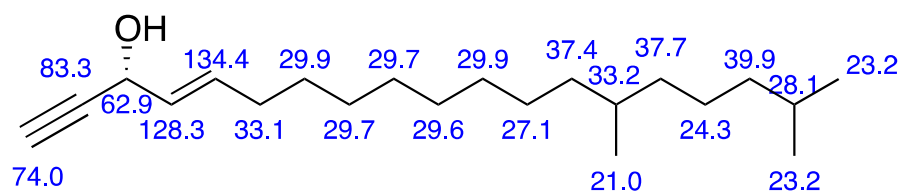

Figure S23. EIMS and fragmentation pattern of (3*R*)-13,18-dimethylnonadec-(4*E*)-en-1-yn-3-ol (4).

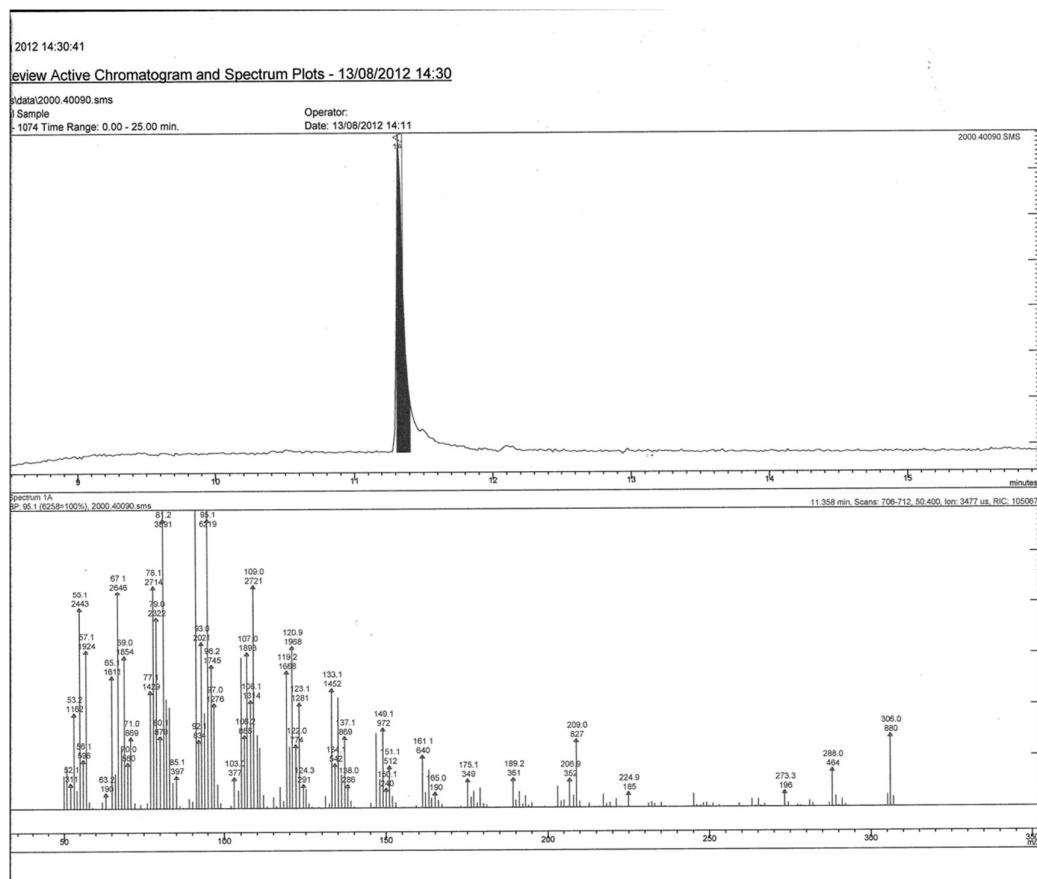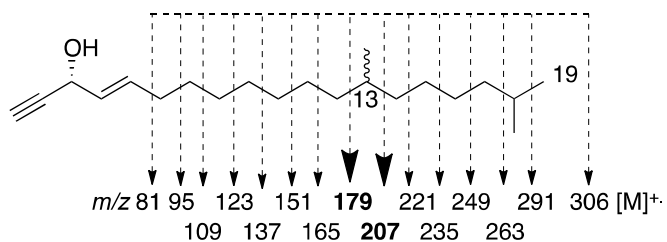

Figure S24. HRMS and fragmentation pattern of (3*R*)-13,18-dimethylnonadec-(4*E*)-en-1-yn-3-ol (**4**)

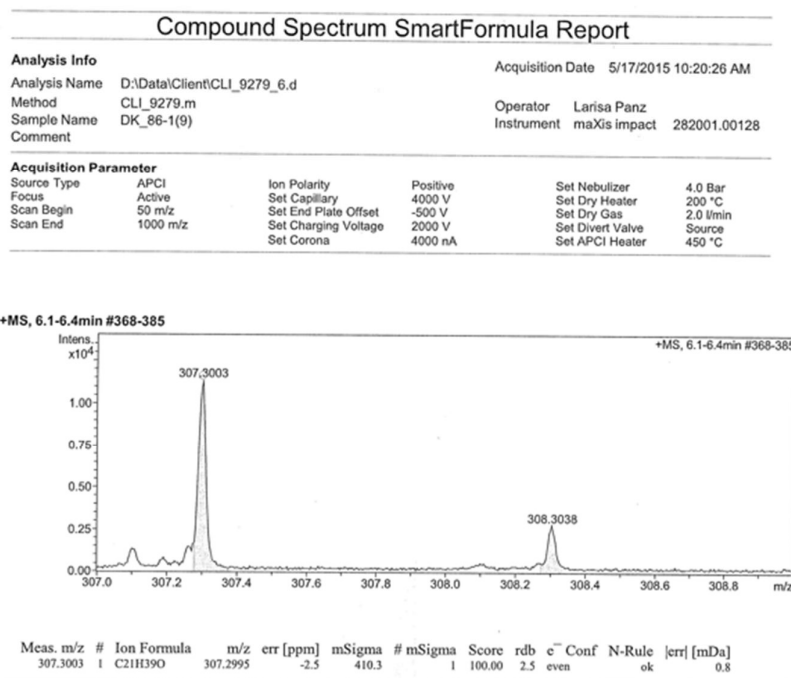

Figure S25.  $^1\text{H}$  NMR spectrum of (3*R*)-14-methylicos-(4*E*)-en-1-yn-3-ol (**5**) in  $\text{CDCl}_3$ .

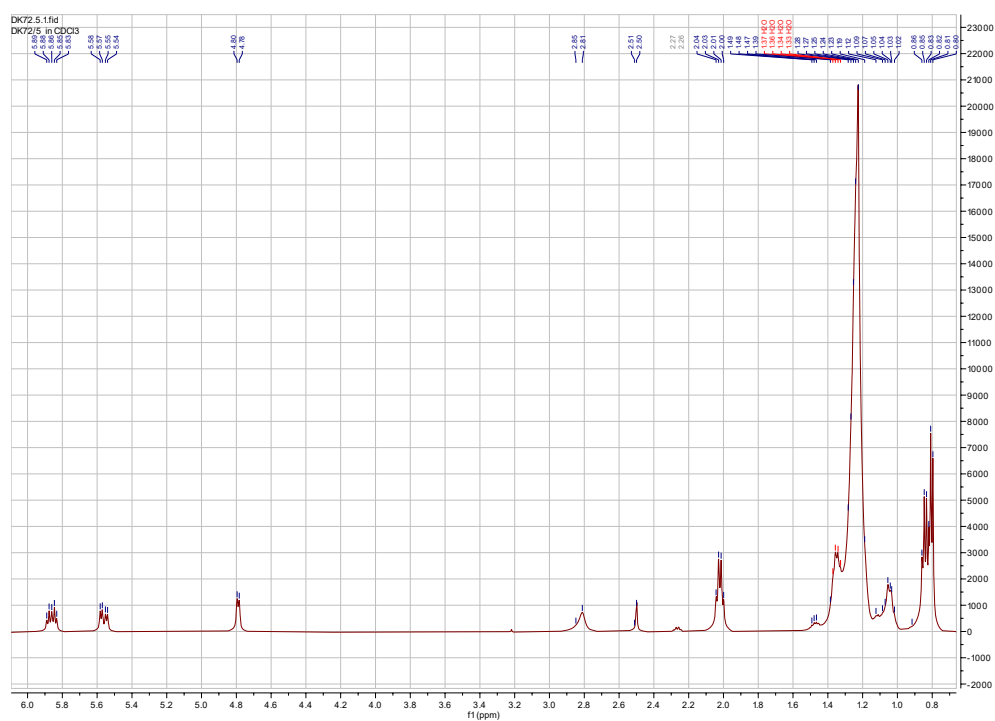

Figure S26.  $^{13}\text{C}$  NMR spectrum of (3*R*)-14-methylicos-(4*E*)-en-1-yn-3-ol (**5**) in  $\text{CDCl}_3$ .

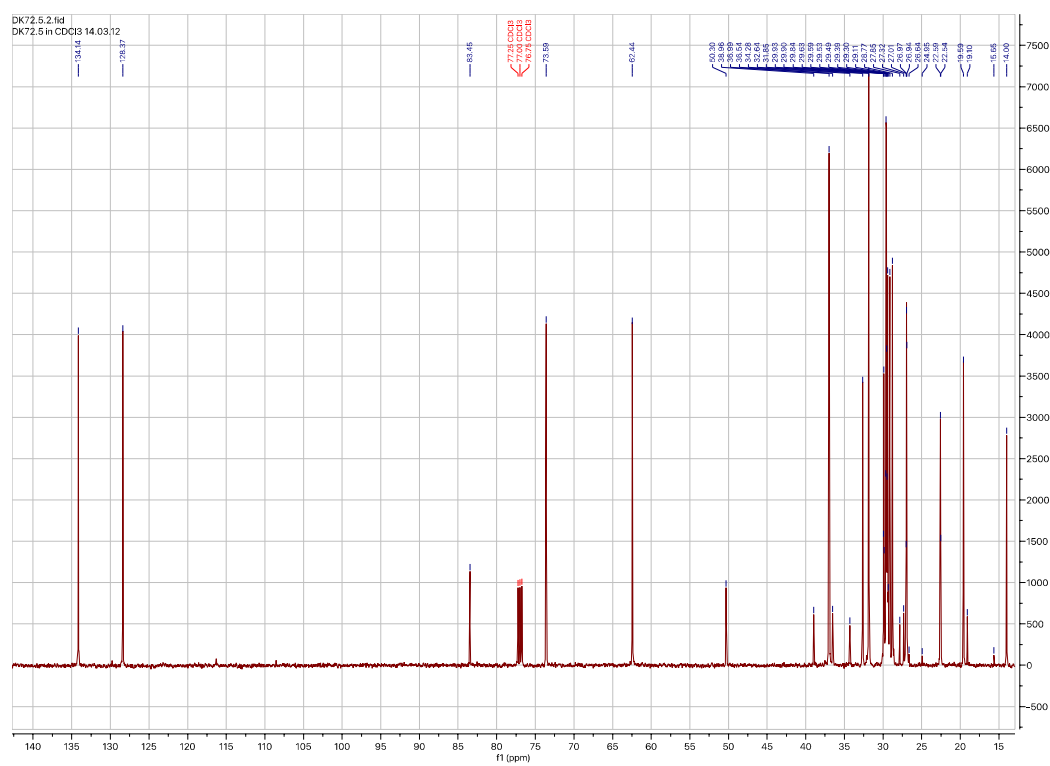

Figure S27. HSQC spectrum of (3*R*)-14-methylicos-(4*E*)-en-1-yn-3-ol (**5**) in CDCl<sub>3</sub>.

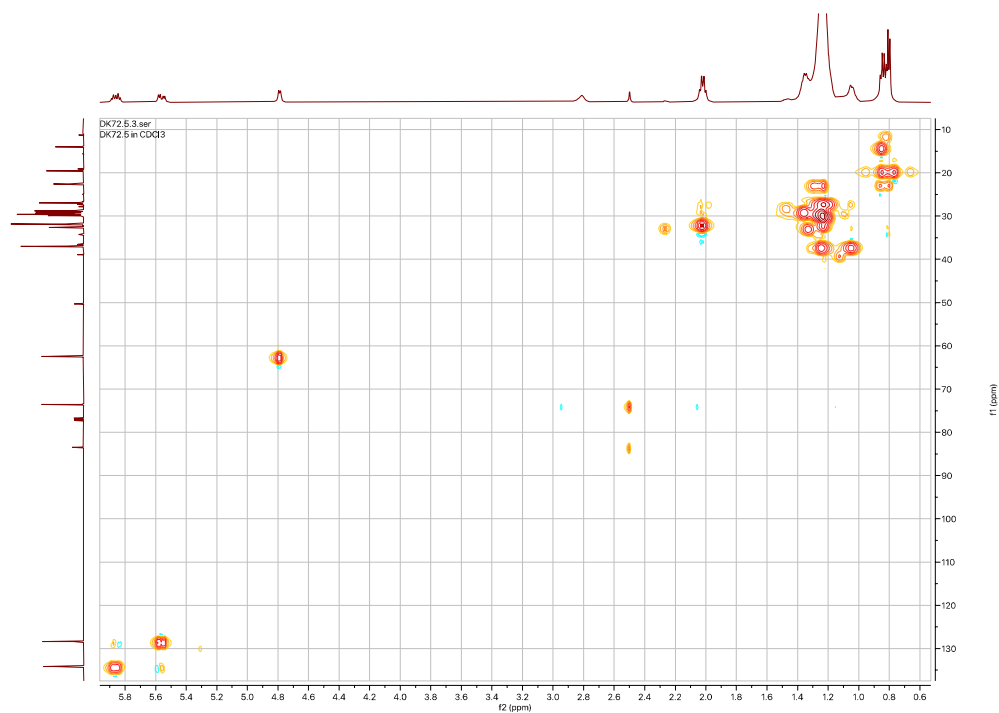

Figure S28. HMBC spectrum of (3*R*)-14-methylicos-(4*E*)-en-1-yn-3-ol (**5**) in CDCl<sub>3</sub>.

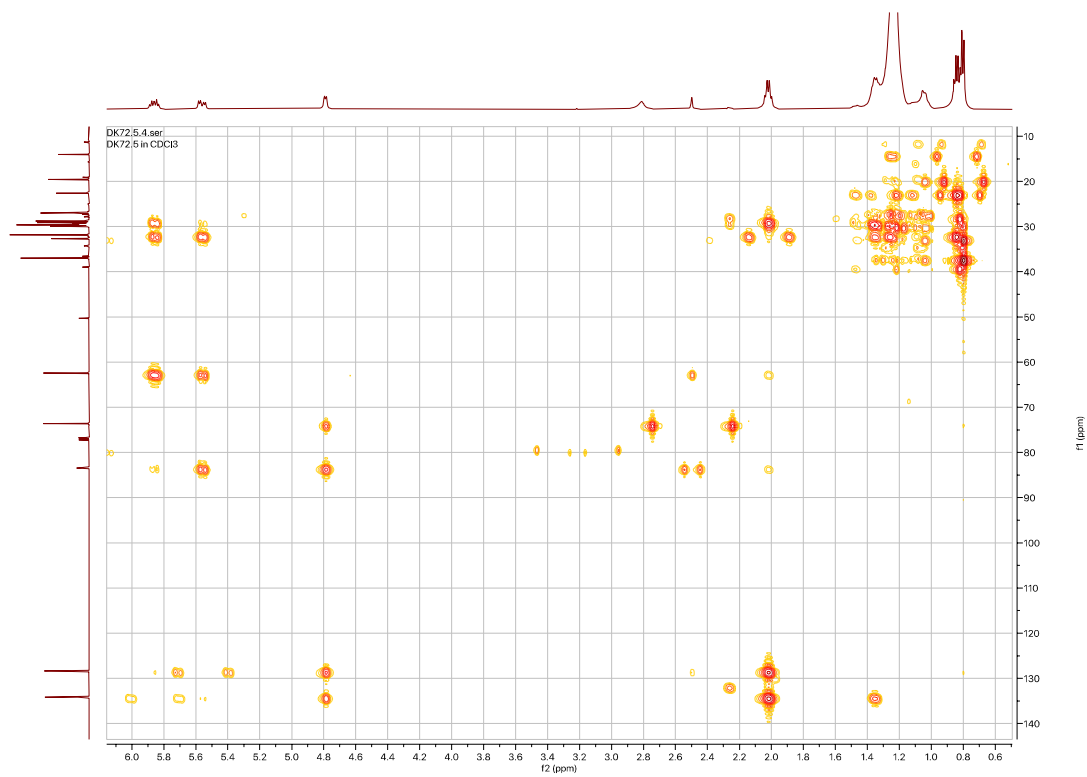



Figure S29. COSY spectrum of (3*R*)-14-methylicos-(4*E*)-en-1-yn-3-ol (**5**) in CDCl<sub>3</sub>.

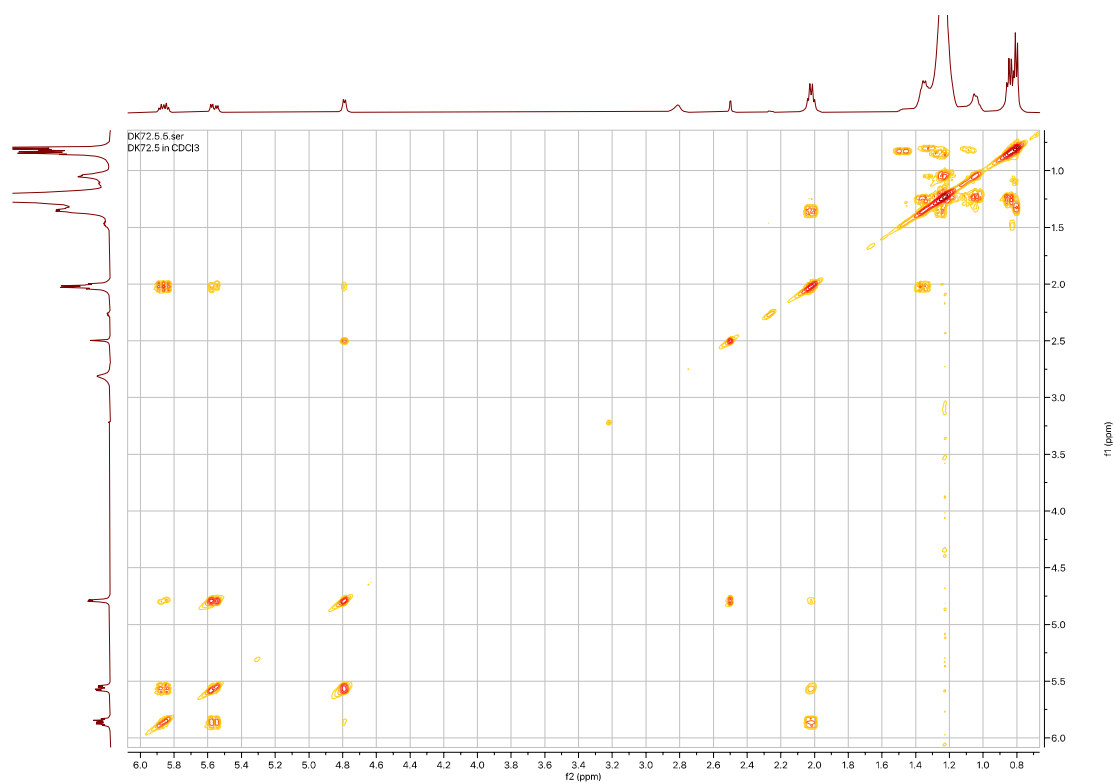

Table S5. NMR data of (3*R*)-14-methylicos-(4*E*)-en-1-yn-3-ol (**5**) in CDCl<sub>3</sub>.<sup>a</sup>

| Position | $\delta_{\text{C}}$ , mult. <sup>b</sup>      | $\delta_{\text{H}}$ , mult. $J$ (Hz) | LR H-C Correlations <sup>c</sup> |
|----------|-----------------------------------------------|--------------------------------------|----------------------------------|
| 1        | 73.8 <sup>d</sup> CH                          | 2.50 d (2.1)                         | 3                                |
| 2        | 83.4 <sup>e</sup> qC                          | -                                    | 1, 3, 4                          |
| 3        | 62.6 CH                                       | 4.79 d (6.0)                         | 1, 4, 5                          |
| 4        | 128.4 CH                                      | 5.56 dd (15.0, 6.0)                  | 3, 6                             |
| 5        | 134.3 CH                                      | 5.85 dt (15.0, 6.8)                  | 3, 6, 7                          |
| 6        | 31.9 CH <sub>2</sub>                          | 2.02 q (6.8)                         | 4, 5, 7, 8                       |
| 7        | 28.8 CH <sub>2</sub>                          | 1.36 m                               | 5, 6, 8                          |
| 8-11     | ~29.6 <sup>f</sup> 4 $\times$ CH <sub>2</sub> | 1.21 – 1.26 brn                      |                                  |
| 12       | 27.0 CH <sub>2</sub>                          | 1.23 m                               | 11, 13a, 13b                     |
| 13a      | 37.0 CH <sub>2</sub>                          | 1.25 m                               | 12, 14, 15a, 15b, 21             |
| b        |                                               | 1.08 m                               |                                  |
| 14       | 32.7 CH                                       | 1.34 m                               | 13a, 13b, 15a, 15a, 21           |
| 15a      | 37.0 CH <sub>2</sub>                          | 1.25 m                               | 13a, 13b, 14, 16, 21             |
| b        |                                               | 1.08 m                               |                                  |
| 16       | 27.0 CH <sub>2</sub>                          | 1.23 m                               | 15a, 15b, 17                     |
| 17       | ~29.6 <sup>f</sup> CH <sub>2</sub>            | 1.21 – 1.26 brn                      |                                  |
| 18       | 31.9 CH <sub>2</sub>                          | 1.23 m                               | 17, 19a, 19b, 20                 |
| 19a      | 22.6 CH <sub>2</sub>                          | 1.29 m                               | 18, 20                           |
| b        |                                               | 1.23 m                               |                                  |
| 20       | 14.0 CH <sub>3</sub>                          | 0.87 t (6.6)                         | 19a, 19b                         |
| 21       | 19.6 CH <sub>3</sub>                          | 0.83 d (6.6)                         | 13b, 15b                         |

<sup>a</sup>500.13 MHz for <sup>1</sup>H and 125.76 MHz for <sup>13</sup>C; <sup>b</sup>Multiplicity and assignment from HSQC experiment;<sup>c</sup>Determined from HMBC experiment; <sup>d</sup>  $^1J = 250.0$  Hz; <sup>e</sup>  $^2J = 48.8$  Hz; <sup>f</sup>Exact <sup>13</sup>C chemical shifts 29.15, 29.43, 29.57, 29.63, 29.95 ppm.

Figure S30. EIMS and fragmentation pattern of (3*R*)-14-methylicos-(4*E*)-en-1-yn-3-ol (**5**).

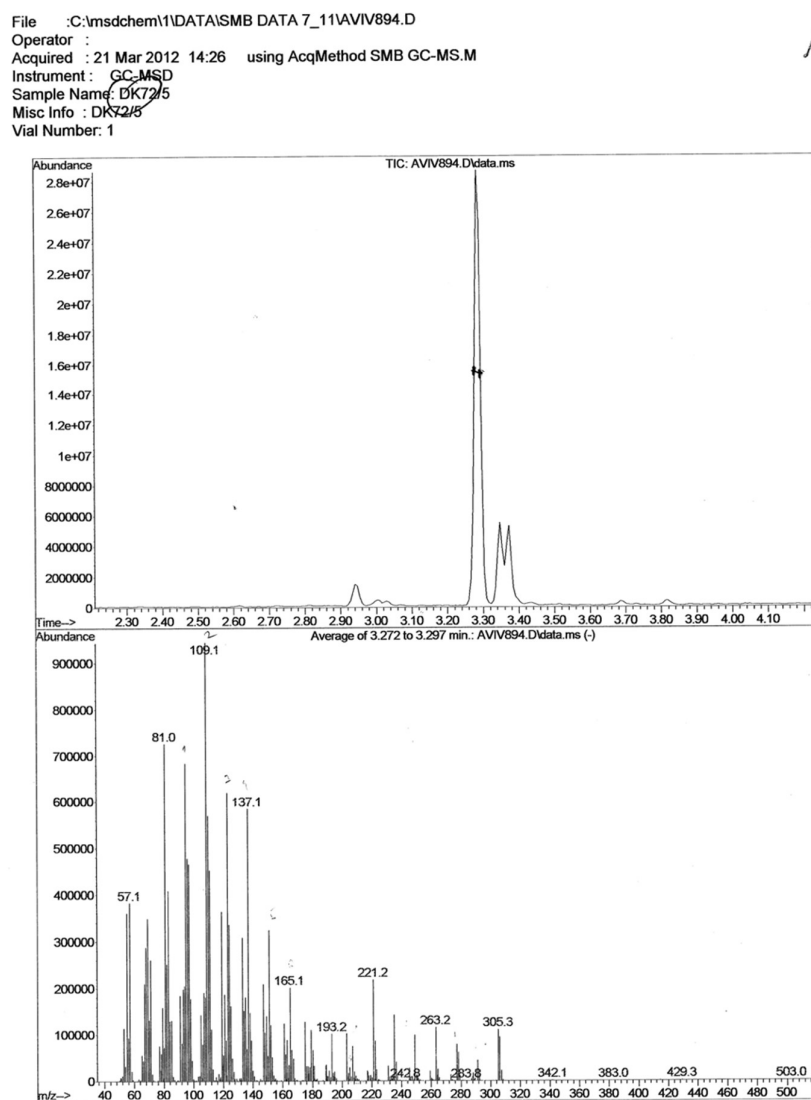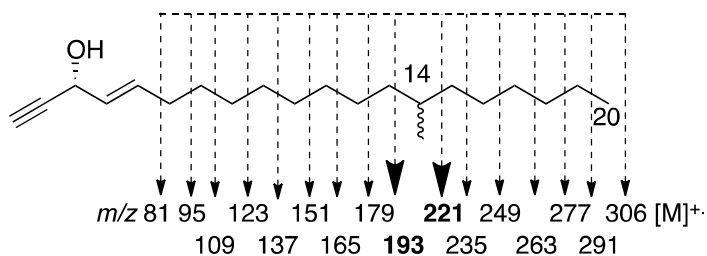

Figure S31. HRMS and fragmentation pattern of (3*R*)-14-methylicos-(4*E*)-en-1-yn-3-ol (**5**).

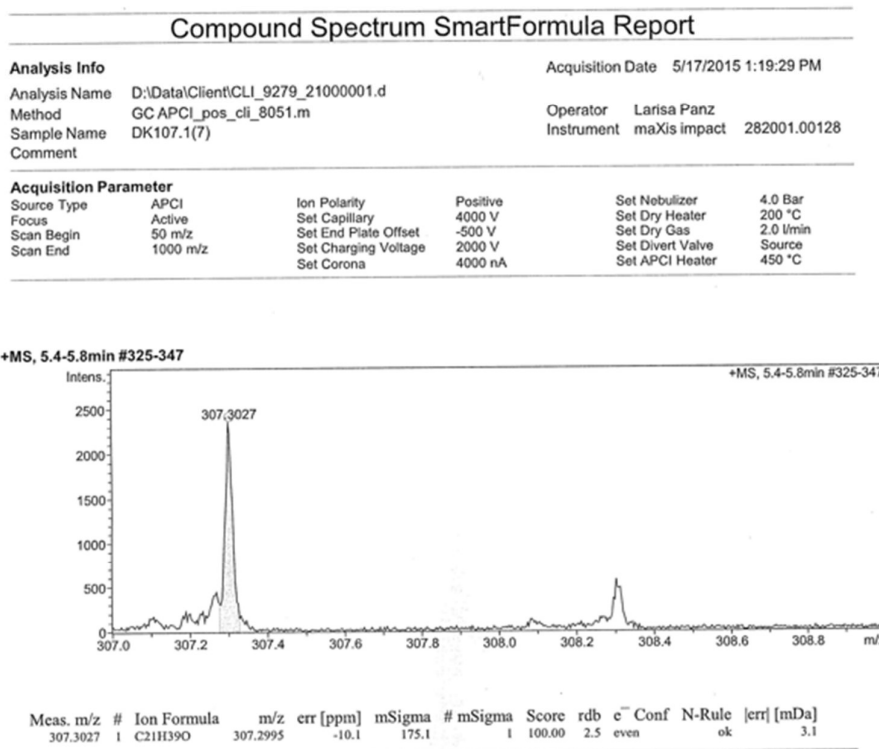

Figure S32. <sup>1</sup>H NMR spectrum of 14-methylicos-(4*E*)-en-1-yn-3-one (**6**) in CDCl<sub>3</sub>.

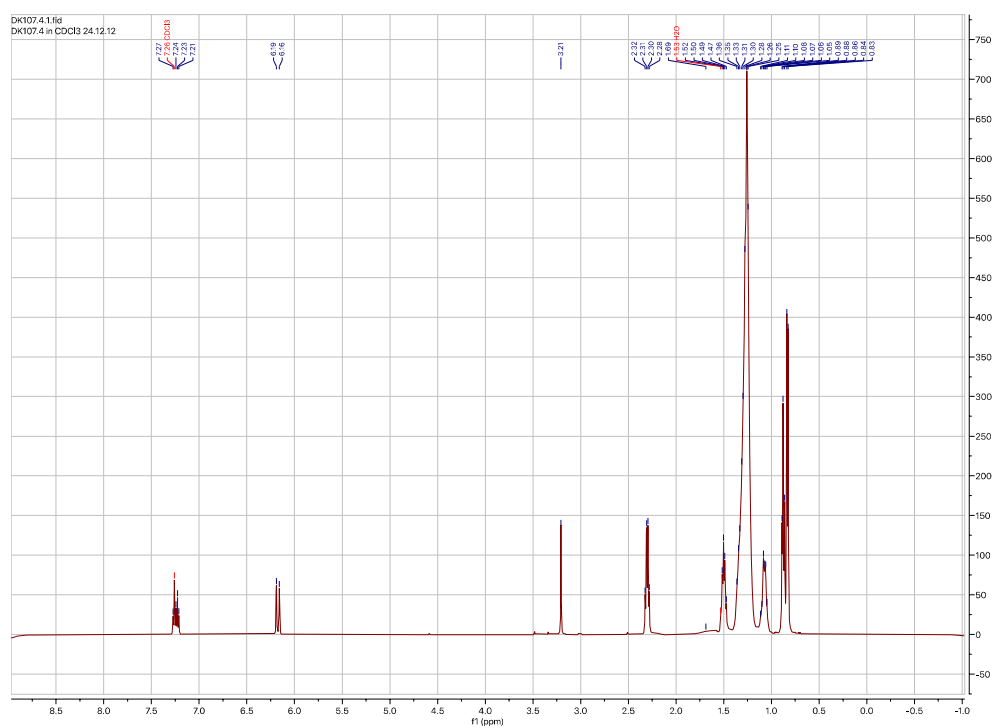

Figure S33.  $^{13}\text{C}$  NMR spectrum of 14-methylicos-(4*E*)-en-1-yn-3-one (**6**) in  $\text{CDCl}_3$ .

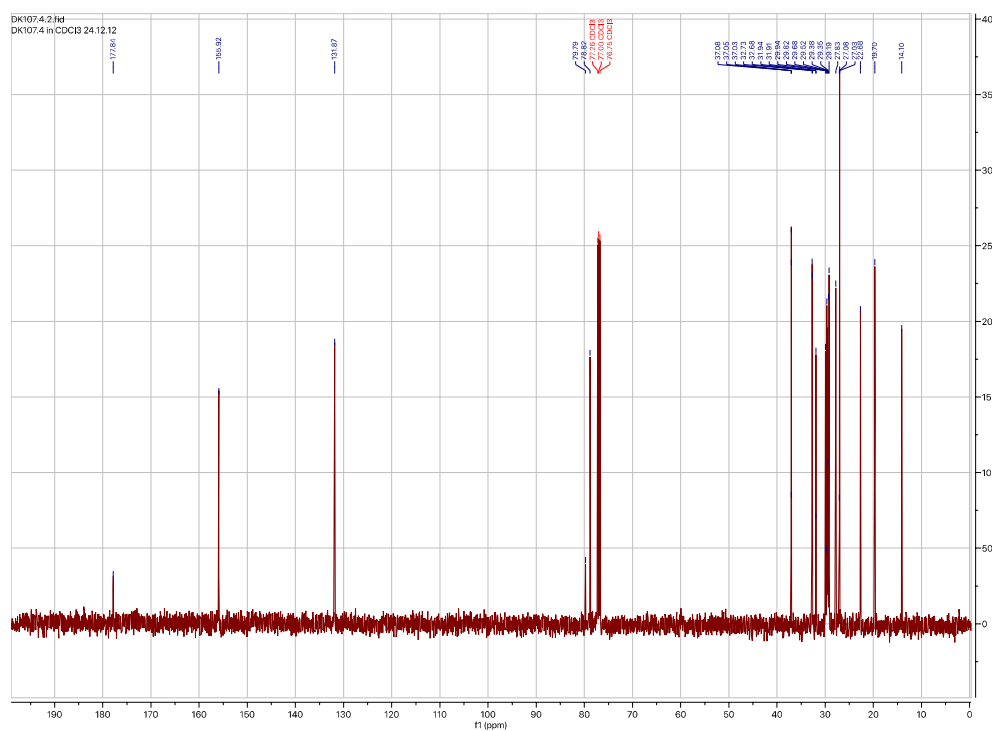

Table S6. NMR data of 14-methylicos-(4*E*)-en-1-yn-3-one (**6**) in CDCl<sub>3</sub>.<sup>a</sup>

| Position | $\delta_{\text{C}}$ , mult. <sup>b</sup>      | $\delta_{\text{H}}$ , mult. $J$ (Hz) | LR H-C Correlations <sup>c</sup> |
|----------|-----------------------------------------------|--------------------------------------|----------------------------------|
| 1        | 78.8 <sup>d</sup> CH                          | 3.21 s                               | -                                |
| 2        | 79.8 <sup>e</sup> qC                          | -                                    | 1, 4                             |
| 3        | 177.8 qC                                      | -                                    | 1, 4, 5                          |
| 4        | 131.9 CH                                      | 6.17 d (16.0)                        | 6                                |
| 5        | 155.9 CH                                      | 7.24 dt (16.0, 7.0)                  | 6, 7                             |
| 6        | 32.7 CH <sub>2</sub>                          | 2.30 q (7.0)                         | 4, 5, 7, 8                       |
| 7        | 27.8 CH <sub>2</sub>                          | 1.50 tt (7.0, 7.0)                   | 5, 6, 8                          |
| 8        | 29.2 CH <sub>2</sub>                          | 1.30 m                               |                                  |
| 9-11     | ~29.6 <sup>f</sup> 3 $\times$ CH <sub>2</sub> | 1.23 – 1.31 brm                      |                                  |
| 12       | 27.0 CH <sub>2</sub>                          | 1.23 m                               | 11, 13a, 13b                     |
| 13a      | 37.1 CH <sub>2</sub>                          | 1.26 m                               | 12, 14, 15a, 15b, 21             |
| b        |                                               | 1.07 m                               |                                  |
| 14       | 32.7 CH                                       | 1.37 m                               | 13a, 13b, 15a, 15a, 21           |
| 15a      | 37.1 CH <sub>2</sub>                          | 1.26 m                               | 13a, 13b, 14, 16, 21             |
| b        |                                               | 1.07 m                               |                                  |
| 16       | 27.0 CH <sub>2</sub>                          | 1.25 m                               | 15a, 15b, 17                     |
| 17       | 29.9 CH <sub>2</sub>                          | 1.26 m                               |                                  |
| 18       | 31.9 CH <sub>2</sub>                          | 1.25 m                               | 17, 19a, 19b, 20                 |
| 19a      | 22.7 CH <sub>2</sub>                          | 1.31 m                               | 18, 20                           |
| b        |                                               | 1.25 m                               |                                  |
| 20       | 14.1 CH <sub>3</sub>                          | 0.88 t (6.5)                         | 19a, 19b                         |
| 21       | 19.7 CH <sub>3</sub>                          | 0.83 d (6.5)                         | 13b, 15b                         |

<sup>a</sup>500.13 MHz for <sup>1</sup>H and 125.76 MHz for <sup>13</sup>C; <sup>b</sup>Multiplicity and assignment from HSQC experiment;<sup>c</sup>Determined from HMBC experiment; <sup>d</sup> $^1J = 253.5$  Hz; <sup>e</sup> $^2J = 48.0$  Hz; <sup>f</sup>Exact <sup>13</sup>C chemical shifts 29.34, 29.51, 29.67ppm.

Figure S34. EIMS and fragmentation pattern of 14-methylicos-(4*E*)-en-1-yn-3-one (6)

File : C:\msdchem\1\data\Aviv 2014\282.D  
 Operator :  
 Acquired : 30 Oct 2014 15:30 using AcqMethod Organics Cold EI.M  
 Instrument : 5975-SMB  
 Sample Name:  
 Misc Info : Dima DK1074 C<sub>21</sub>H<sub>36</sub>O MW 304  
 Vial Number: 0

ΔK 107.4

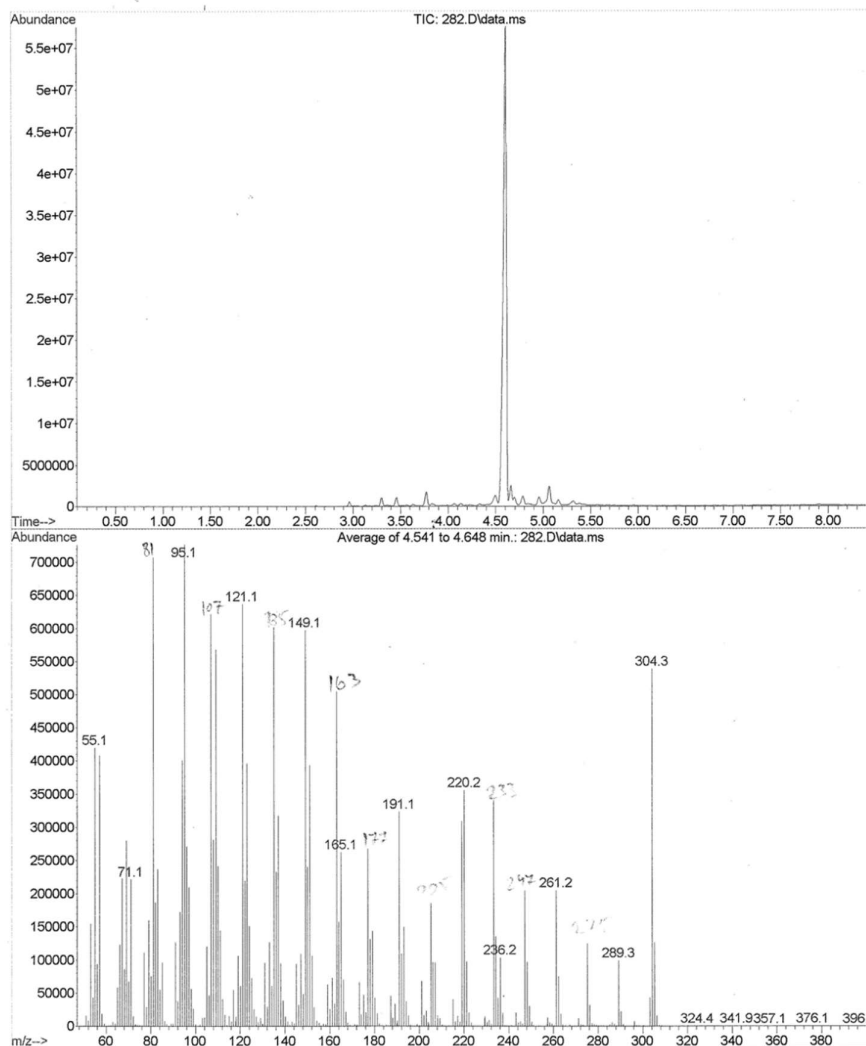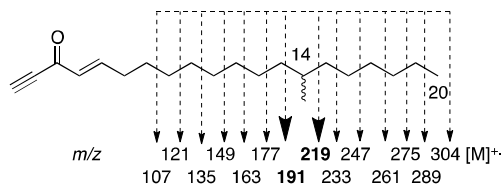

Figure S35. HRCIMS and fragmentation pattern of 14-methylicos-(4*E*)-en-1-yn-3-one (6)

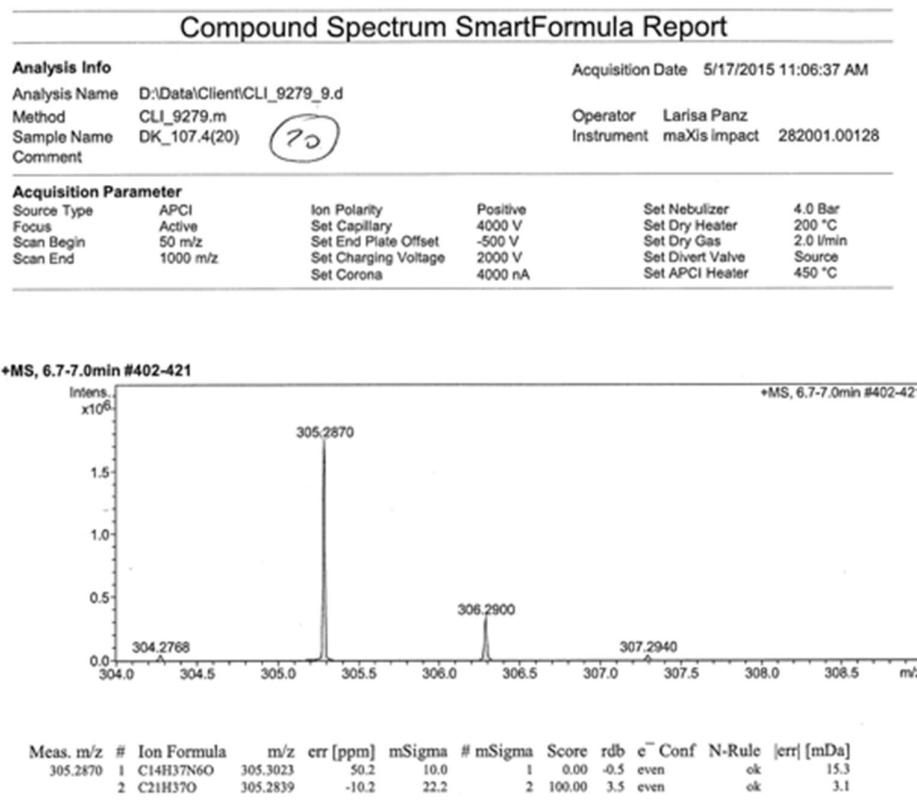



Figure S36.  $^1\text{H}$  NMR spectrum of (3*R*)-14-methylicos-1-yn-3-ol (**7**) in  $\text{CDCl}_3$

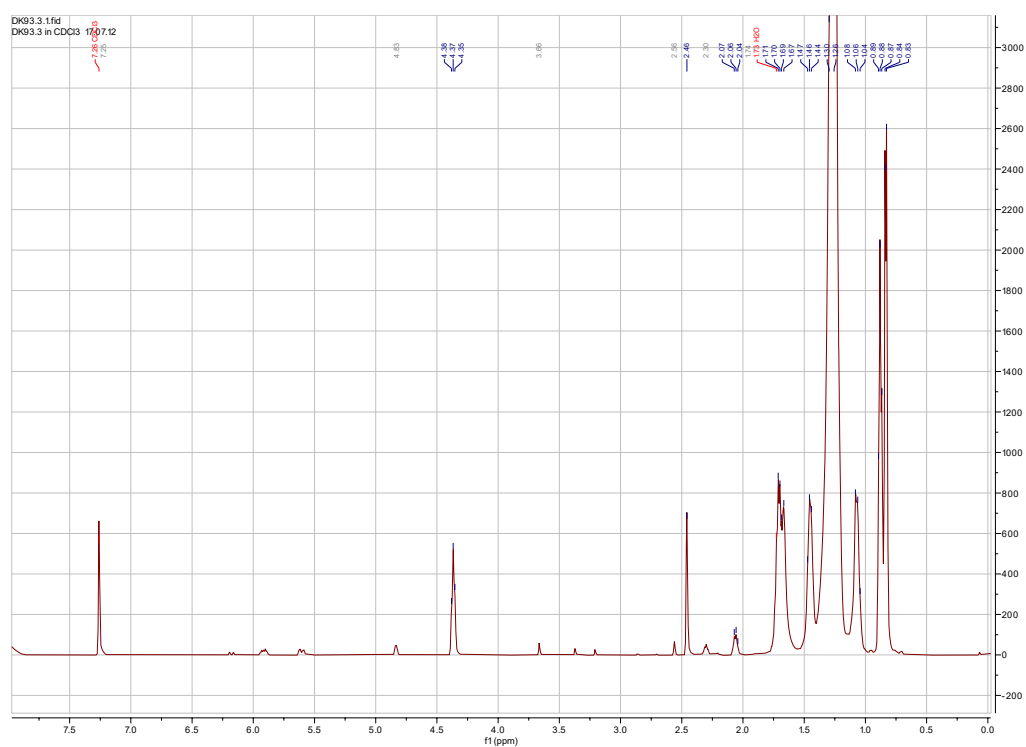

Figure S35.  $^{13}\text{C}$  NMR spectrum of (3*R*)-14-methylicos-1-yn-3-ol (**7**) in  $\text{CDCl}_3$

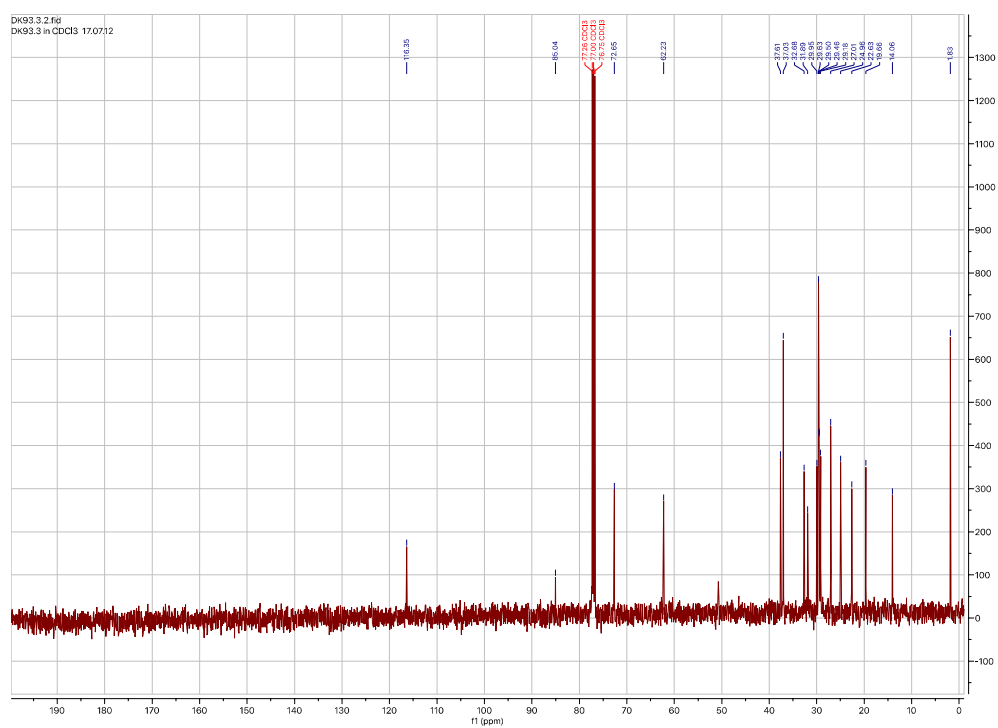

Figure S38. HSQC spectrum of (3*R*)-14-methylicos-1-yn-3-ol (**7**) in CDCl<sub>3</sub>

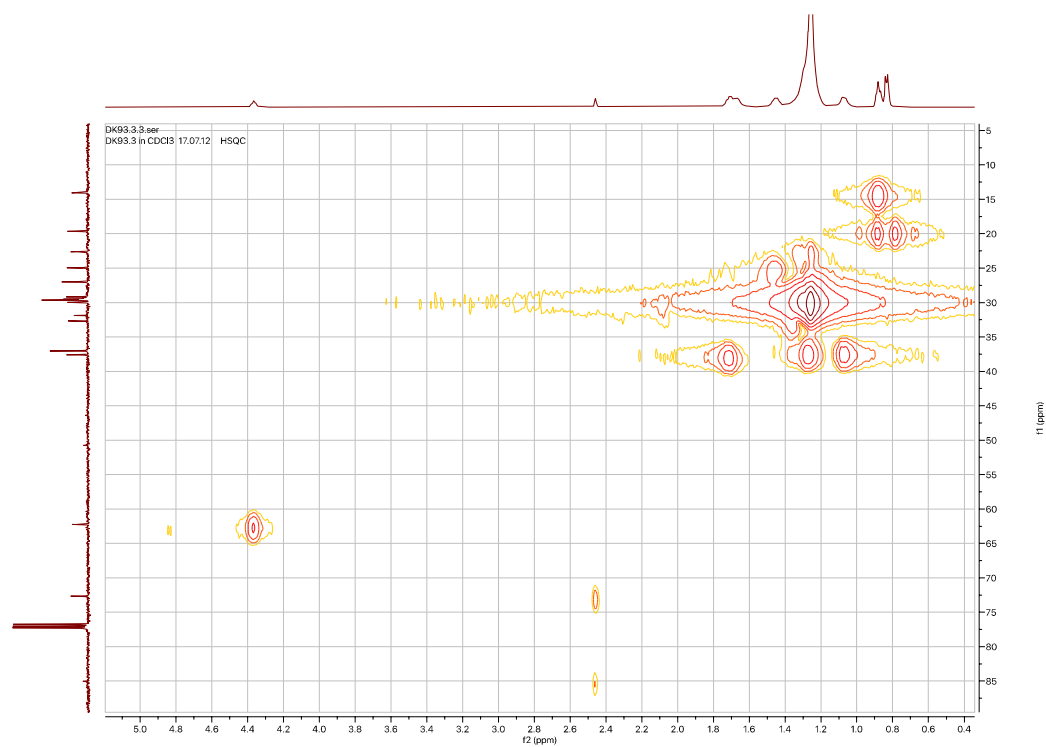

Figure S39. HMBC spectrum of (3*R*)-14-methylicos-1-yn-3-ol (**7**) in CDCl<sub>3</sub>

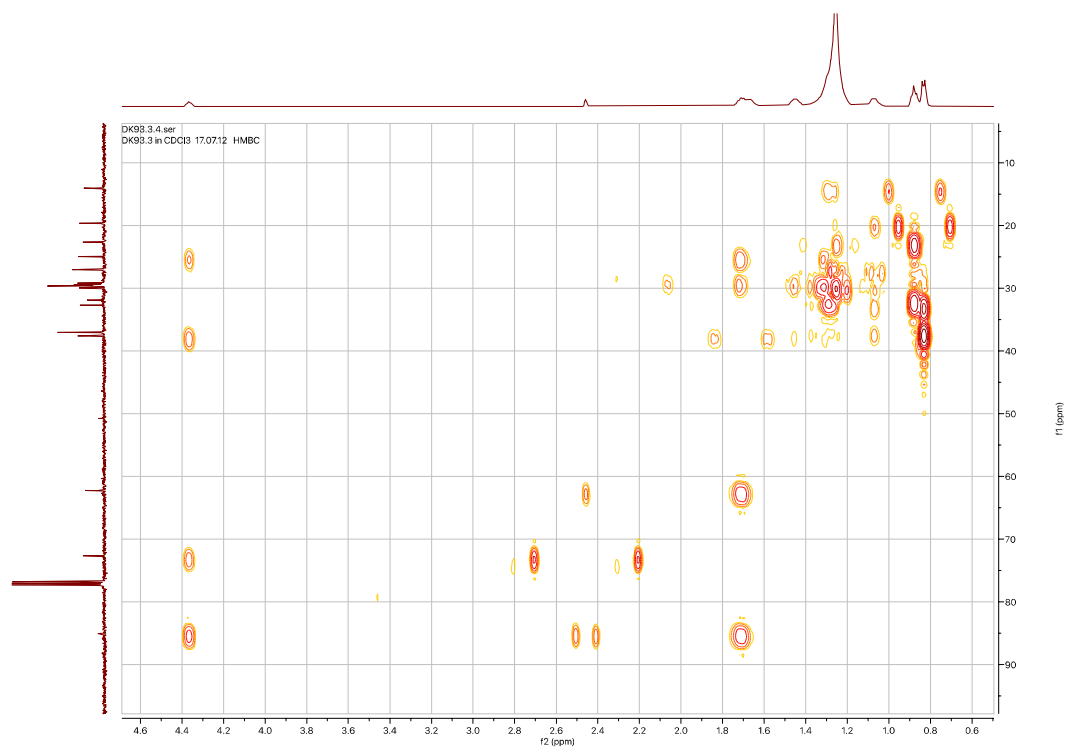

Figure S40. COSY spectrum of (3*R*)-14-methylicos-1-yn-3-ol (**7**) in CDCl<sub>3</sub>

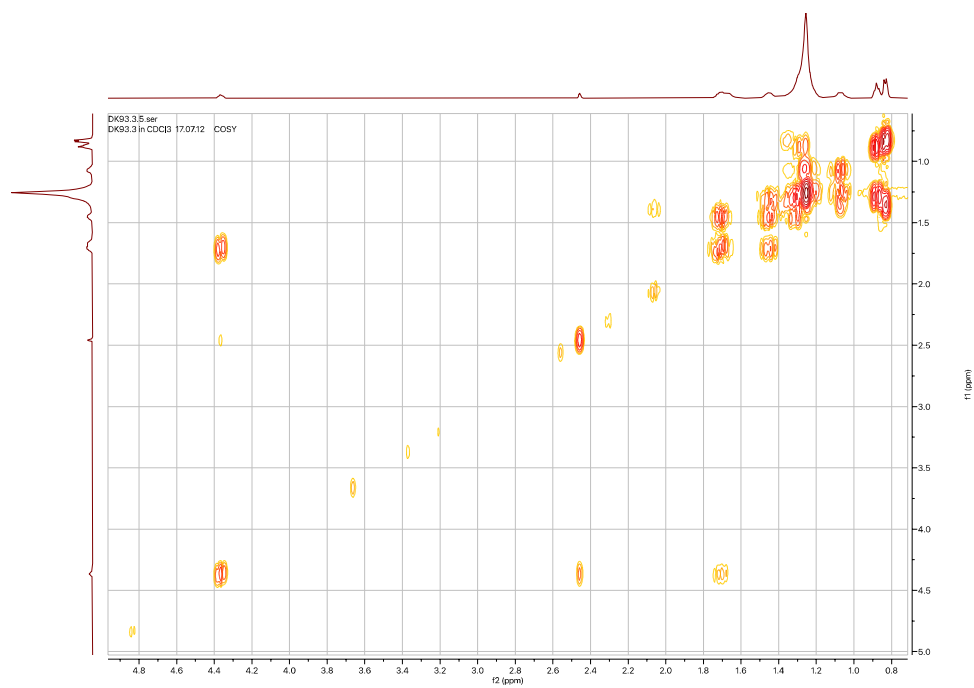

Figure S41. DEPT spectrum of (3*R*)-14-methylicos-1-yn-3-ol (**7**) in CDCl<sub>3</sub>

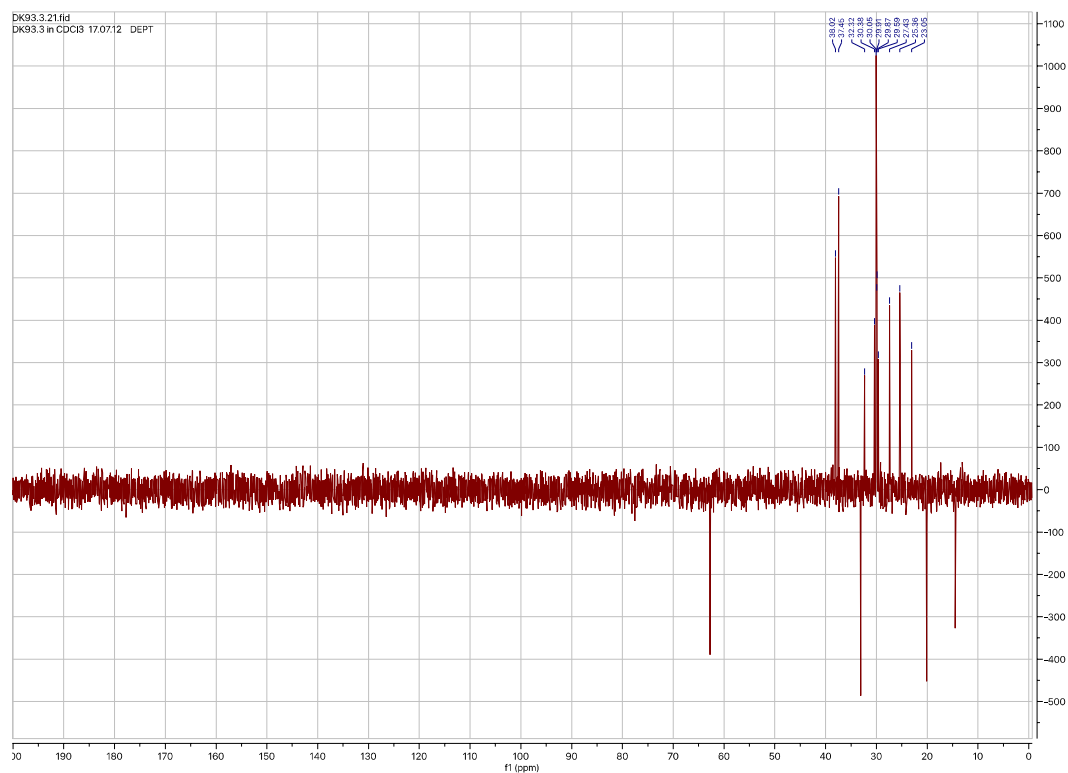

Table S7. NMR data of (3*R*)-14-methylicos-1-yn-3-ol (**7**) in CDCl<sub>3</sub>.<sup>a</sup>

| Position | $\delta_{\text{C}}$ , mult. <sup>b</sup>    | $\delta_{\text{H}}$ , mult. $J$ (Hz) | LR H-C Correlations <sup>c</sup> |
|----------|---------------------------------------------|--------------------------------------|----------------------------------|
| 1        | 72.6 <sup>d</sup> CH                        | 2.46 d (2.0)                         | 3                                |
| 2        | 85.0 <sup>e</sup> qC                        | -                                    | 1, 3, 4                          |
| 3        | 62.2 CH                                     | 4.36 td (6.5, 2.0)                   | 1, 4                             |
| 4        | 37.6 CH <sub>2</sub>                        | 1.71 m                               | 3, 6                             |
| 5        | 25.0 CH <sub>2</sub>                        | 1.45 m                               | 3, 4, 6, 7                       |
| 6        | 29.2 CH <sub>2</sub>                        | 1.26 m                               | 4, 5                             |
| 7-11     | $\sim 29.5^{\text{f}} 5 \times \text{CH}_2$ | 1.22 – 1.31 brm                      |                                  |
| 12       | 27.0 CH <sub>2</sub>                        | 1.23 m                               | 11, 13a, 13b                     |
| 13a      | 37.0 CH <sub>2</sub>                        | 1.25 m                               | 12, 14, 15a, 15b, 21             |
| b        |                                             | 1.07 m                               |                                  |
| 14       | 32.6 CH                                     | 1.34 m                               | 13a, 13b, 15a, 15a, 21           |
| 15a      | 37.0 CH <sub>2</sub>                        | 1.25 m                               | 13a, 13b, 14, 16, 21             |
| b        |                                             | 1.07 m                               |                                  |
| 16       | 27.0 CH <sub>2</sub>                        | 1.23 m                               | 15a, 15b, 17                     |
| 17       | 30.0 CH <sub>2</sub>                        | 1.24 m                               |                                  |
| 18       | 31.9 CH <sub>2</sub>                        | 1.23 m                               | 17, 19a, 19b, 20                 |
| 19a      | 22.6 CH <sub>2</sub>                        | 1.29 m                               | 18, 20                           |
| b        |                                             | 1.23 m                               |                                  |
| 20       | 14.1 CH <sub>3</sub>                        | 0.87 t (7.0)                         | 19a, 19b                         |
| 21       | 19.6 CH <sub>3</sub>                        | 0.83 d (7.0)                         | 13b, 15b                         |

<sup>a</sup>500.13 MHz for <sup>1</sup>H and 125.76 MHz for <sup>13</sup>C; <sup>b</sup>Multiplicity and assignment from HSQC experiment;<sup>c</sup>Determined from HMBC experiment; <sup>d</sup> $^1J = 251.0$  Hz; <sup>e</sup> $^2J = 46.0$  Hz; <sup>f</sup>Exact <sup>13</sup>C chemical shifts 29.46, 29.50, 29.58, 29.63 ( $\times 2$ ) ppm.

Figure S42. EIMS and fragmentation pattern of (3*R*)-14-methylicos-1-yn-3-ol (7)

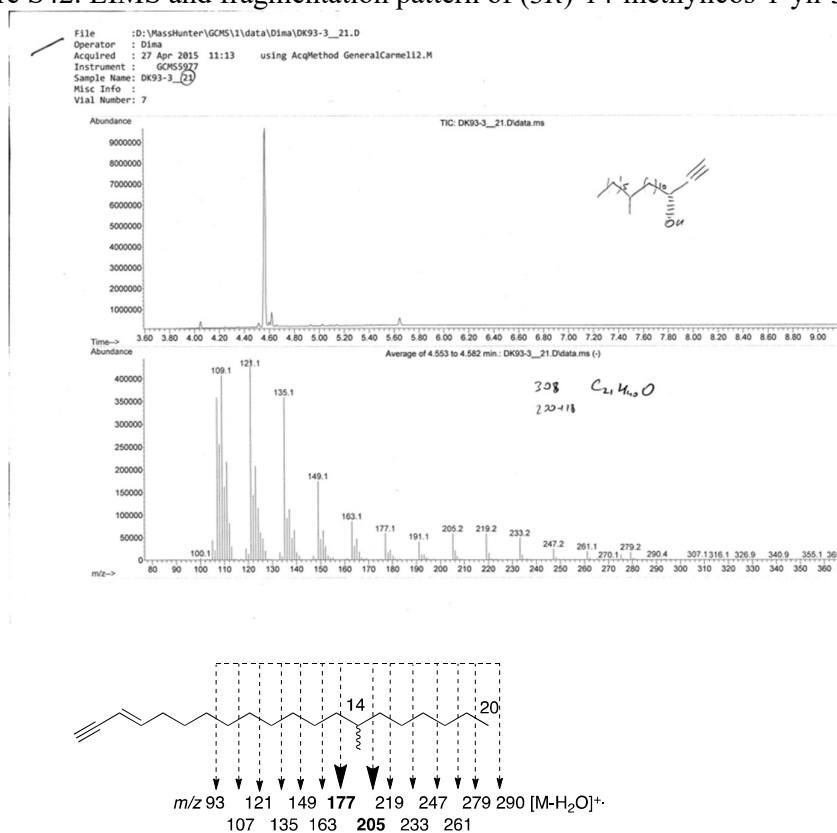

Figure S43. HRMS and fragmentation pattern of (3*R*)-14-methylicos-1-yn-3-ol (7)

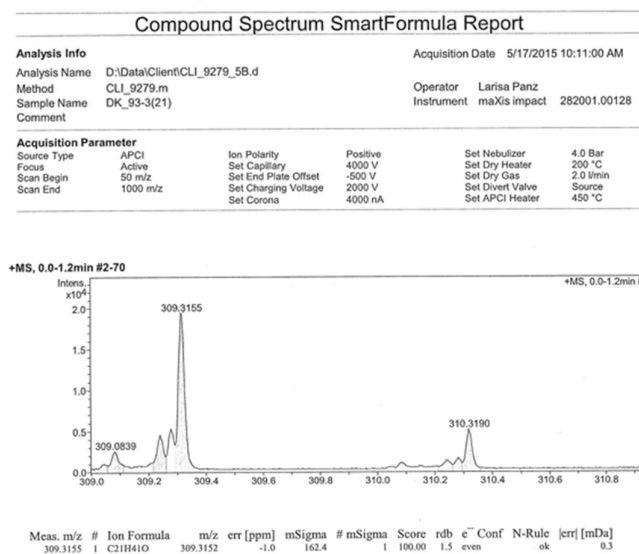

Figure S44. <sup>1</sup>H NMR spectrum of (3*R,E*)-12-*cis*-(2-hexylcyclopropyl)dodec-4-en-1-yn-3-ol (**8**) in CDCl<sub>3</sub>.

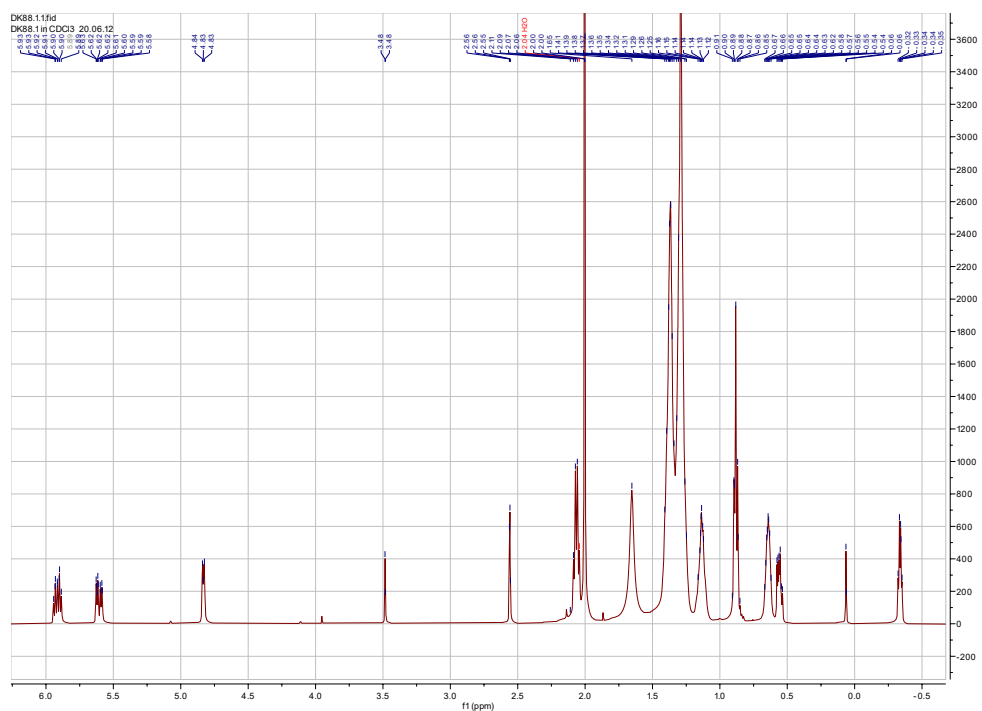

Figure S45.  $^{13}\text{C}$  NMR spectrum of (3*R,E*)-12-*cis*-(2-hexylcyclopropyl)dodec-4-en-1-yn-3-ol (**8**) in  $\text{CDCl}_3$ .

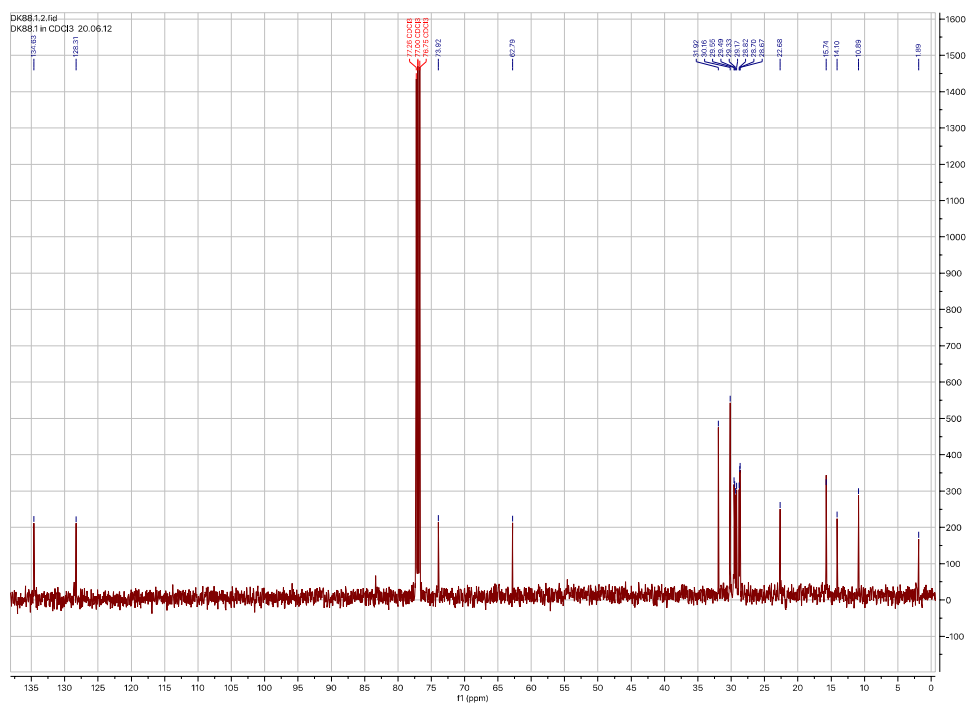

Figure S46. HSQC spectrum of (3*R,E*)-12-*cis*-(2-hexylcyclopropyl)dodec-4-en-1-yn-3-ol (**8**) in CDCl<sub>3</sub>.

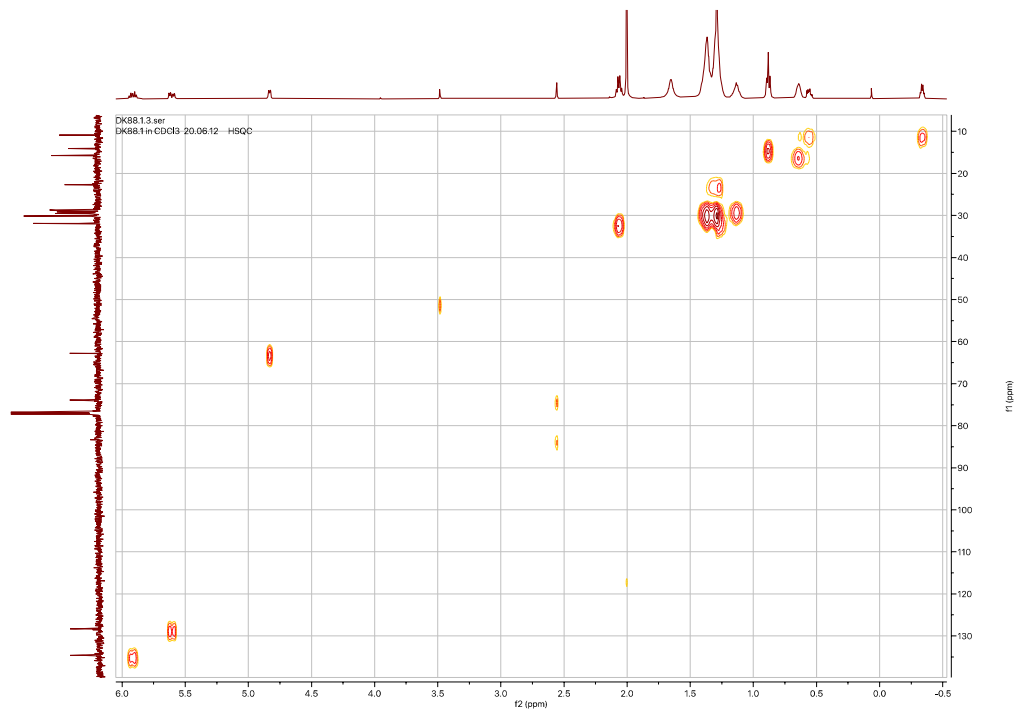

Figure S47. HMBC spectrum of (3*R,E*)-12-*cis*-(2-hexylcyclopropyl)dodec-4-en-1-yn-3-ol (**8**) in CDCl<sub>3</sub>.

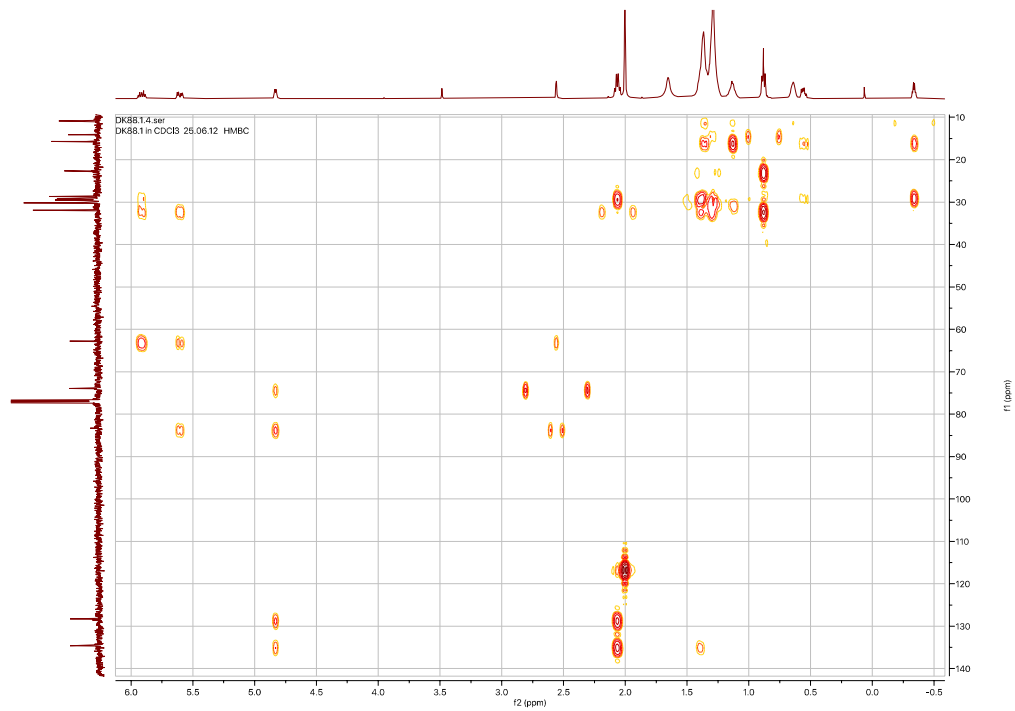

Figure S48. COSY spectrum of (3*R,E*)-12-*cis*-(2-hexylcyclopropyl)dodec-4-en-1-yn-3-ol (**8**) in CDCl<sub>3</sub>.

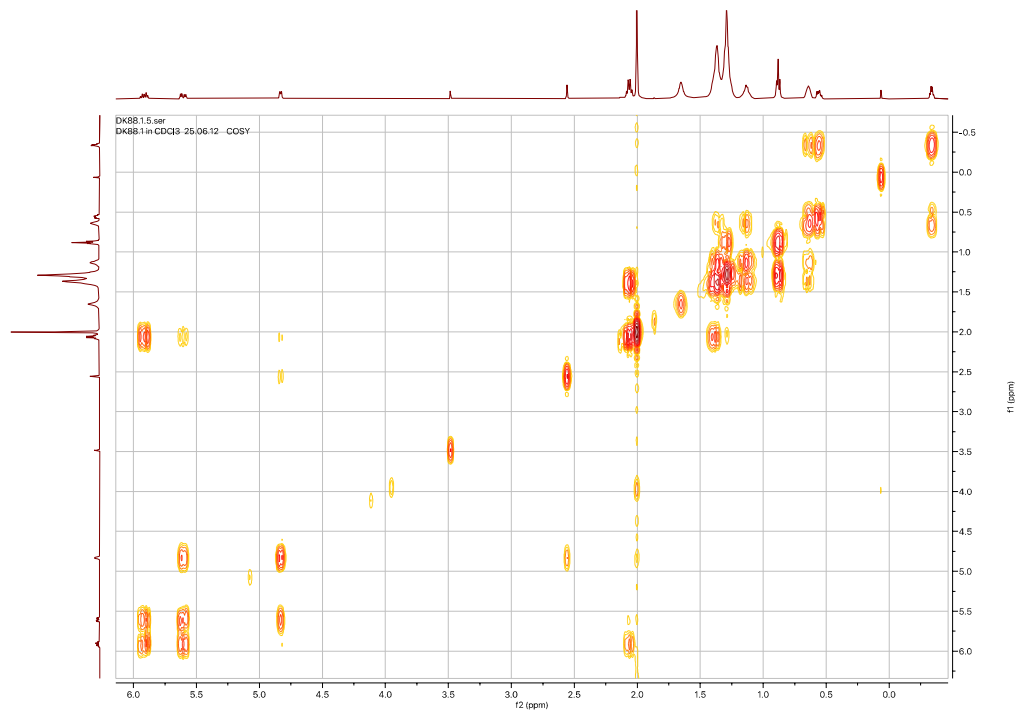

Figure S49. DEPT spectrum of (3*R,E*)-12-*cis*-(2-hexylcyclopropyl)dodec-4-en-1-yn-3-ol (**8**) in CDCl<sub>3</sub>.

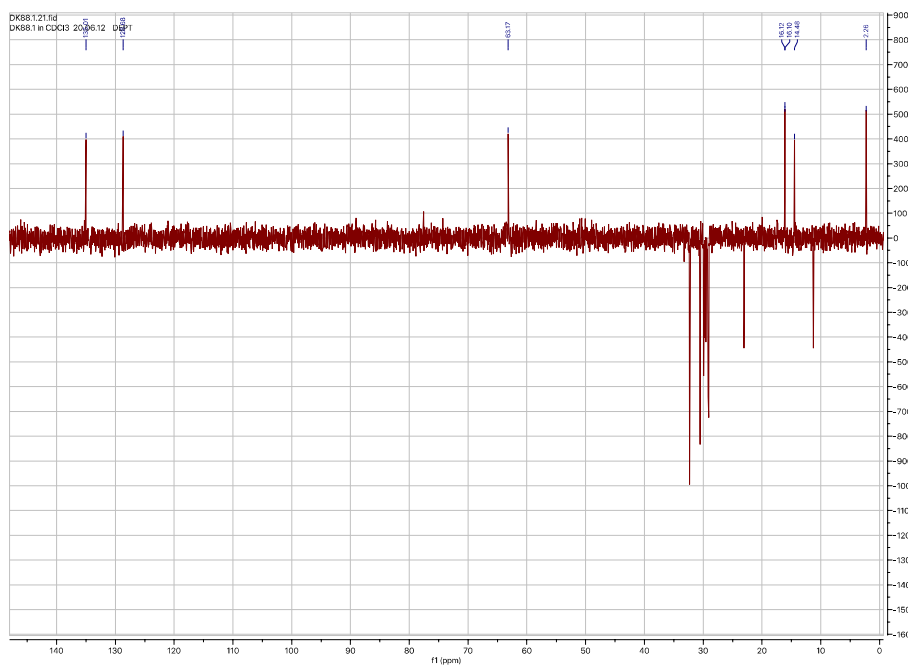



Table S8. NMR data of (3*R,E*)-12-*cis*-(2-hexylcyclopropyl)dodec-4-en-1-yn-3-ol (**8**) in CDCl<sub>3</sub>.<sup>a</sup>

| Position | $\delta_{\text{C}}$ , mult. <sup>b</sup>      | $\delta_{\text{H}}$ , mult. $J$ (Hz) | LR H-C Correlations <sup>c</sup>     |
|----------|-----------------------------------------------|--------------------------------------|--------------------------------------|
| 1        | 73.9 <sup>d</sup> CH                          | 2.56 d (2.1)                         | 3                                    |
| 2        | 83.3 <sup>e</sup> qC                          | -                                    | 1, 3, 4                              |
| 3        | 62.8 CH                                       | 4.83 brd (5.7)                       | 1, 4                                 |
| 4        | 128.3 CH                                      | 5.60 dd (15.2, 5.7)                  | 3, 6                                 |
| 5        | 134.6 CH                                      | 5.91 dt (15.2, 7.0)                  | 3, 4, 6, 7                           |
| 6        | 31.9 CH <sub>2</sub>                          | 2.06 q (7.0)                         | 4, 5, 7, 8                           |
| 7        | 28.8 CH <sub>2</sub>                          | 1.36 m                               | 5, 6, 8                              |
| 8-10     | ~29.6 <sup>f</sup> 3 $\times$ CH <sub>2</sub> | 1.24 – 1.32 brm                      |                                      |
| 11       | 30.2 CH <sub>2</sub>                          | 1.35 m                               | 10, 12a, 12b,                        |
| 12a      | 28.7 CH <sub>2</sub>                          | 1.35 m                               | 11, 13a, 13b                         |
| b        |                                               | 1.13 m                               |                                      |
| 13       | 15.7 CH                                       | 0.64 m                               | 11, 12a, 12b, 14, 15a, 15b, 21a, 21b |
| 14       | 15.7 CH                                       | 0.64 m                               | 11, 12a, 12b, 14, 15a, 15b, 21a, 21b |
| 15a      | 28.7 CH <sub>2</sub>                          | 1.35 m                               | 13a, 13b, 14, 16, 21a, 21b           |
| b        |                                               | 1.13 m                               |                                      |
| 16       | 30.2 CH <sub>2</sub>                          | 1.35 m                               | 15a, 15b, 17                         |
| 17       | ~29.6 <sup>f</sup> CH <sub>2</sub>            | 1.24 – 1.32 brm                      |                                      |
| 18       | 31.9 CH <sub>2</sub>                          | 1.26 m                               | 17, 19                               |
| 19       | 22.7 CH <sub>2</sub>                          | 1.31 m                               | 18, 20                               |
| 20       | 14.1 CH <sub>3</sub>                          | 0.88 t (6.8)                         | 18, 19                               |
| 21a      | 10.9 CH <sub>2</sub>                          | -0.55 td (8.2, 4.0)                  | 11, 12a, 12b, 13, 14, 15a, 15b, 16   |
| b        |                                               | -0.33 td (4.9, 4.0)                  |                                      |

<sup>a</sup>500.13 MHz for <sup>1</sup>H and 125.76 MHz for <sup>13</sup>C; <sup>b</sup>Multiplicity and assignment from HSQC experiment;

<sup>c</sup>Determined from HMBC experiment; <sup>d</sup> $^1J = 251.3$  Hz; <sup>e</sup> $^2J = 48.9$  Hz; <sup>f</sup>Exact <sup>13</sup>C chemical shifts 29.17, 29.33, 29.49, 29.55 ppm.

Figure S50. Measured and calculated  $^{13}\text{C}$  NMR data of (3*R,E*)-12-*cis*-(2-hexylcyclopropyl)dodec-4-en-1-yn-3-ol (**8**)

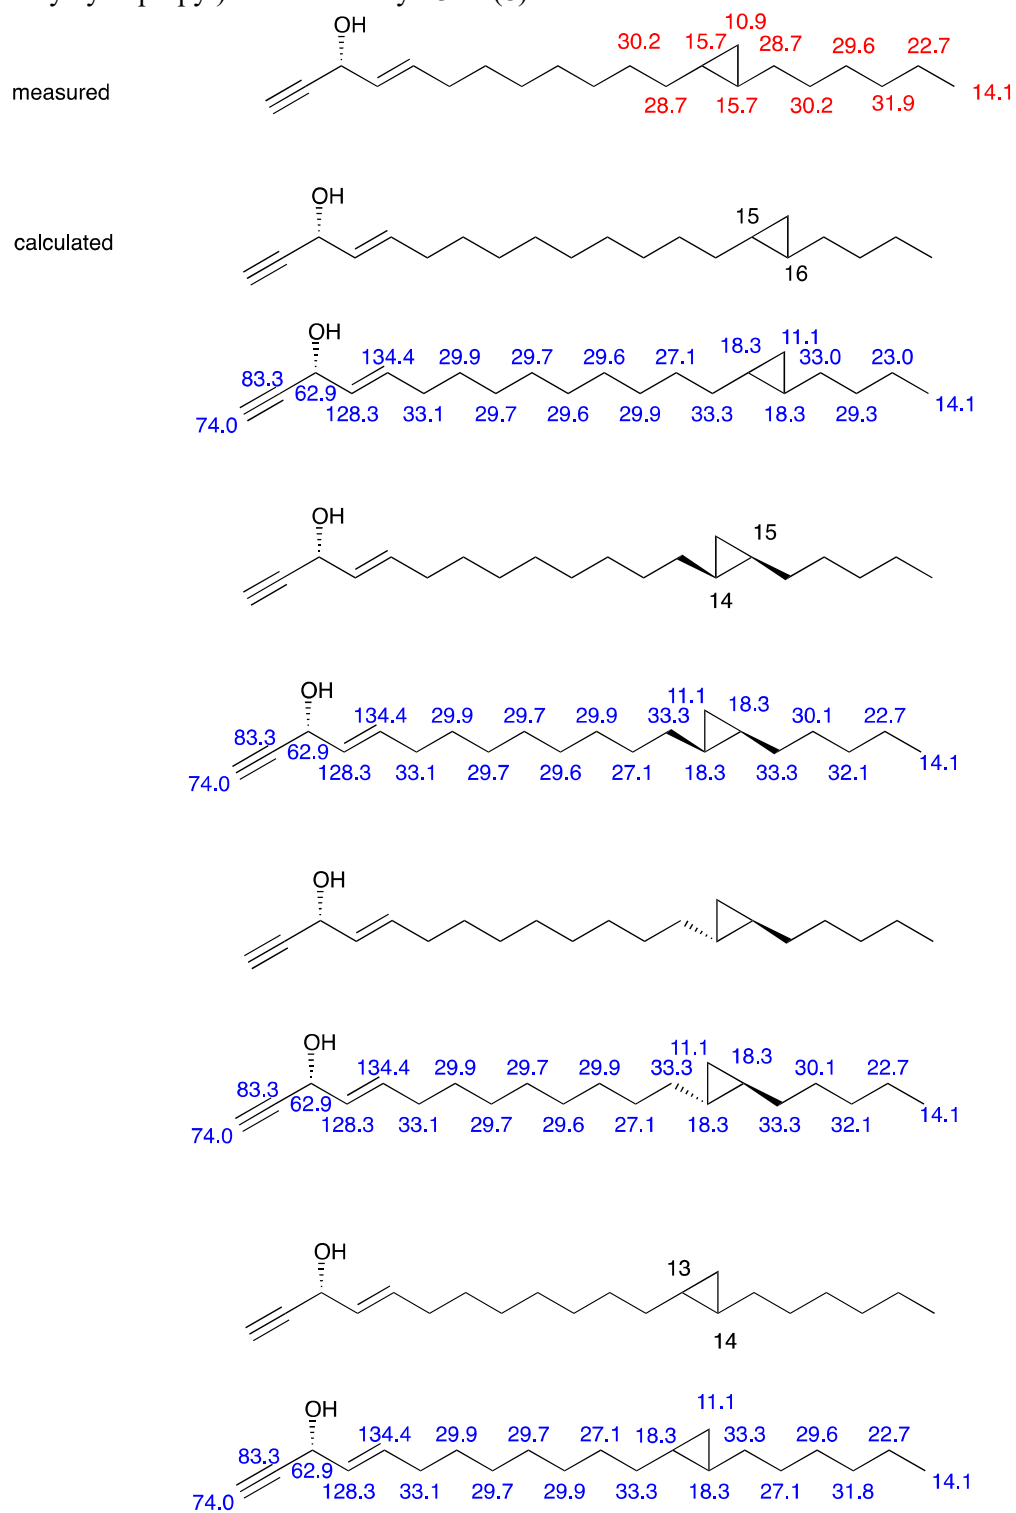

Figure S51. EIMS of (3*R,E*)-12-*cis*-(2-hexylcyclopropyl)dodec-4-en-1-yn-3-ol (**8**).

Print Date: 14 Aug 2012 10:56:20

MS Data Review Active Chromatogram and Spectrum Plots - 14/08/2012 10:56

File: c:\varian\data\2000.40096.sms

Sample: Manual Sample

Scan Range: 1 - 876 Time Range: 0.00 - 25.00 min.

Operator:

Date: 14/08/2012 10:41

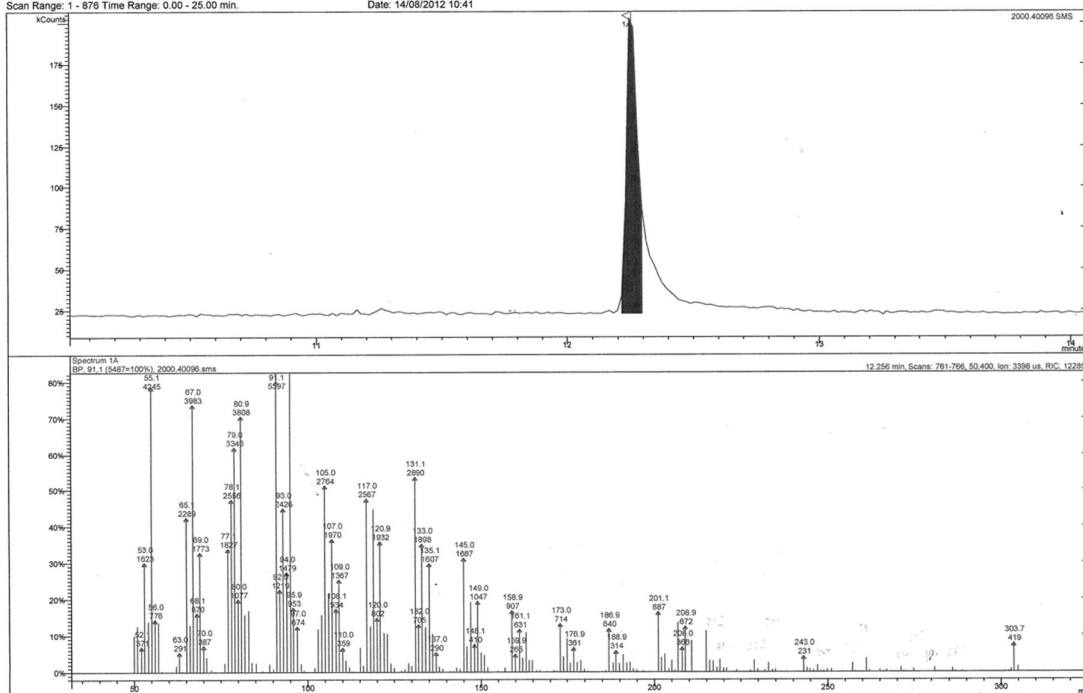

Figure S52. HRMS of (3*R,E*)-12-*cis*-(2-hexylcyclopropyl)dodec-4-en-1-yn-3-ol (**8**).

| Compound Spectrum SmartFormula Report |                             |                                        |              |                         |
|---------------------------------------|-----------------------------|----------------------------------------|--------------|-------------------------|
| <b>Analysis Info</b>                  |                             | Acquisition Date 5/17/2015 11:06:37 AM |              |                         |
| Analysis Name                         | D:\Data\Client\CLI_9279_9.d |                                        |              |                         |
| Method                                | CLI_9279.m                  | Operator                               | Larisa Panz  |                         |
| Sample Name                           | (10) DK 88.1                | Instrument                             | maXis impact | 282001.00128            |
| <b>Acquisition Parameter</b>          |                             |                                        |              |                         |
| Source Type                           | APCI                        | Ion Polarity                           | Positive     | Set Nebulizer 4.0 Bar   |
| Focus                                 | Active                      | Set Capillary                          | 4000 V       | Set Dry Heater 200 °C   |
| Scan Begin                            | 50 m/z                      | Set End Plate Offset                   | -500 V       | Set Dry Gas 2.0 l/min   |
| Scan End                              | 1000 m/z                    | Set Charging Voltage                   | 2000 V       | Set Divert Valve Source |
|                                       |                             | Set Corona                             | 4000 nA      | Set APCI Heater 450 °C  |

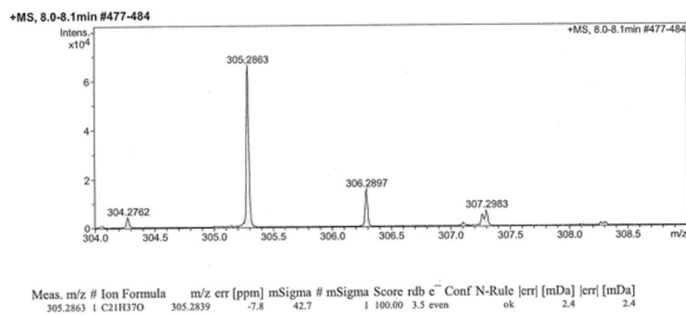

Figure S53a. Proposed fragmentation pattern of the EIMS parent ion of (3*R*,*E*)-12-*cis*-(2-hexylcyclopropyl)dodec-4-en-1-yn-3-ol (**8**).

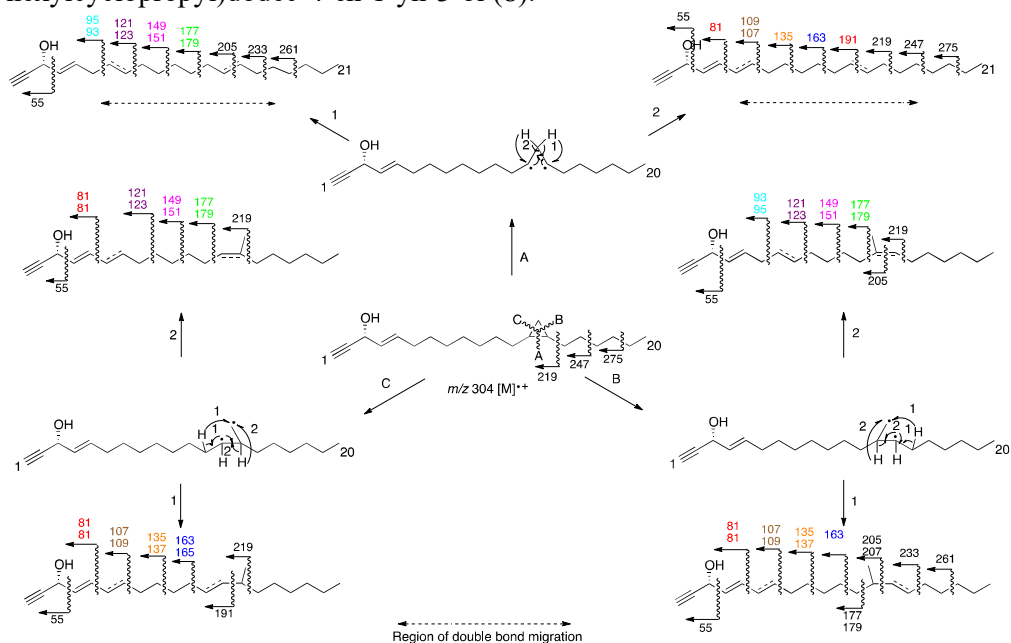

Figure S53b. Proposed fragmentation pattern of the EIMS water elimination product ion of (3*R*,*E*)-12-*cis*-(2-hexylcyclopropyl)dodec-4-en-1-yn-3-ol (**8**).

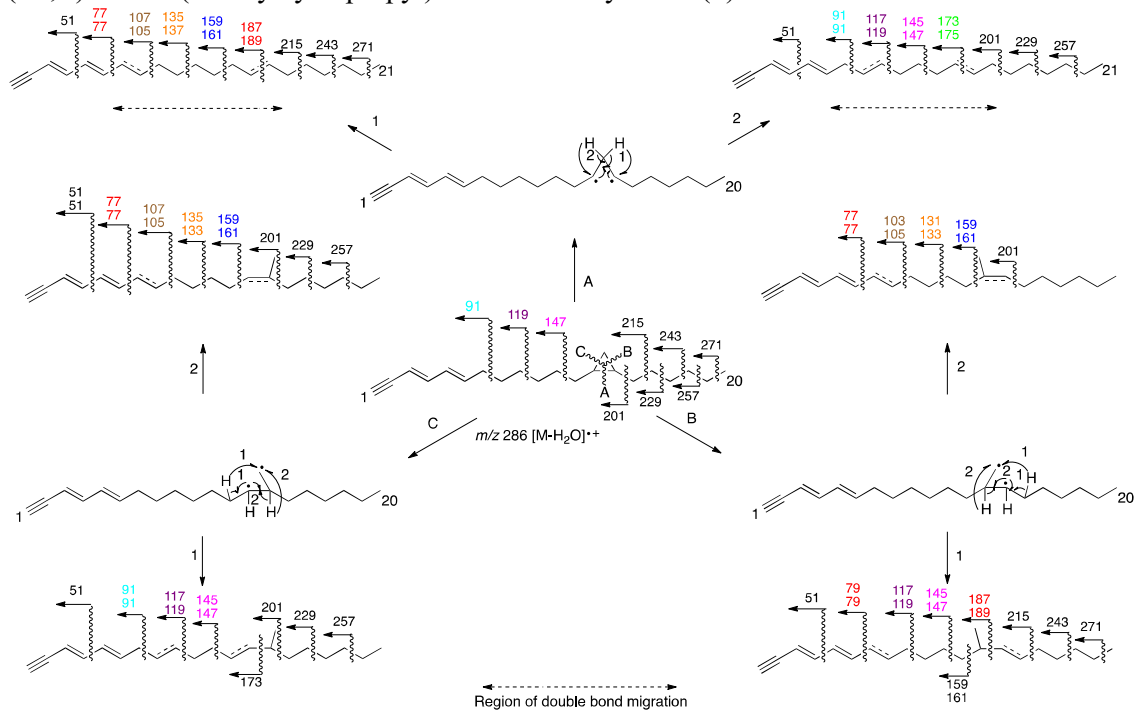

[illegible]

Table S9. NMR data of (3*R*)-13-methylhenicos-(4*E*)-en-1-yn-3-ol (**9**) in CDCl<sub>3</sub>.<sup>a</sup>

| Position | $\delta_{\text{C}}$ , mult. <sup>b</sup> | $\delta_{\text{H}}$ , mult. $J$ (Hz) | LR H-C Correlations <sup>c</sup> |
|----------|------------------------------------------|--------------------------------------|----------------------------------|
| 1        | 73.9 <sup>d</sup> CH                     | 2.55 d (2.5)                         | 3                                |
| 2        | 83.3 <sup>e</sup> qC                     | -                                    | 1, 3, 4                          |
| 3        | 62.8 CH                                  | 4.82 brd (6.0)                       | 1, 4, 5                          |
| 4        | 128.3 CH                                 | 5.60 dd (16.0, 6.0)                  | 6                                |
| 5        | 134.6 CH                                 | 5.91 dt (16.0, 7.5)                  | 3, 6, 7                          |
| 6        | 31.9 CH <sub>2</sub>                     | 2.05 q (7.5)                         | 4, 5, 7, 8                       |
| 7        | 28.8 CH <sub>2</sub>                     | 1.36 m                               | 5, 6, 8                          |
| 8-11     | ~29.6 <sup>f</sup> 4 × CH <sub>2</sub>   | 1.21 – 1.30 brm                      |                                  |
| 12       | 27.0 CH <sub>2</sub>                     | 1.23 m                               | 11, 13a, 13b                     |
| 13a      | 37.1 CH <sub>2</sub>                     | 1.25 m                               | 12, 14, 15a, 15b, 21             |
| b        |                                          | 1.07 m                               |                                  |
| 14       | 32.7 CH                                  | 1.37 m                               | 13a, 13b, 15a, 15a, 22           |
| 15a      | 37.1 CH <sub>2</sub>                     | 1.25 m                               | 13a, 13b, 14, 16, 22             |
| b        |                                          | 1.07 m                               |                                  |
| 16       | 27.0 CH <sub>2</sub>                     | 1.23 m                               | 15a, 15b, 17                     |
| 17-18    | ~29.6 <sup>f</sup> 2 × CH <sub>2</sub>   | 1.21 – 1.30 brm                      |                                  |
| 19       | 31.9 CH <sub>2</sub>                     | 1.23 m                               | 18, 20a, 20b, 21                 |
| 20a      | 22.7 CH <sub>2</sub>                     | 1.29 m                               | 19, 21                           |
| b        |                                          | 1.23 m                               |                                  |
| 21       | 14.1 CH <sub>3</sub>                     | 0.87 t (6.5)                         | 19a, 19b                         |
| 22       | 19.7 CH <sub>3</sub>                     | 0.83 d (6.5)                         | 13b, 15b                         |

<sup>a</sup>500.13 MHz for <sup>1</sup>H and 125.76 MHz for <sup>13</sup>C; <sup>b</sup>Multiplicity and assignment from HSQC experiment;<sup>c</sup>Determined from HMBC experiment; <sup>d</sup><sup>1</sup>*J* = 250.5 Hz; <sup>e</sup><sup>2</sup>*J* = 48.8 Hz; <sup>f</sup>Exact <sup>13</sup>C chemical shifts 29.16, 29.44, 29.66 (× 3), 29.96 ppm.

Print Date: 13 Aug 2012 15:28:23

**MS Data Review Active Chromatogram and Spectrum Plots - 13/08/2012 15:28**

File: c:\varian\data\2000.40093.sms  
Sample: Manual Sample  
Scan Range: 1 - 957 Time Range: 0.00 - 25.00 min.

Operator: \_\_\_\_\_  
Date: 13/08/2012 15:12

**Chromatogram Data (Approximate)**

| Time (min) | Counts |
|------------|--------|
| 13.08      | ~100   |

**Mass Spectrum Data (Approximate)**

| m/z | Relative Intensity |
|-----|--------------------|
| 187 | 100                |
| 147 | ~15                |
| 131 | ~10                |
| 117 | ~8                 |
| 91  | ~5                 |

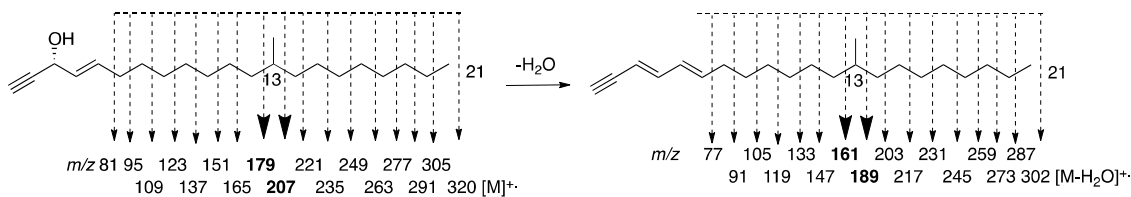

## Compound Spectrum SmartFormula Report

---

|                      |                             |                                               |              |
|----------------------|-----------------------------|-----------------------------------------------|--------------|
| <b>Analysis Info</b> |                             | <b>Acquisition Date</b> 5/17/2015 10:36:18 AM |              |
| <b>Analysis Name</b> | D:\Data\Client\GLI_9279_7.d | <b>Operator</b>                               | Larisa Panz  |
| <b>Method</b>        | GLI_9279.m                  | <b>Instrument</b>                             | maXis impact |
| <b>Sample Name</b>   | DK_93-1(13)                 |                                               | 282001.00128 |
| <b>Comment</b>       |                             |                                               |              |

---

**Acquisition Parameter**

|             |          |                      |          |                  |           |
|-------------|----------|----------------------|----------|------------------|-----------|
| Source Type | APCI     | Ion Polarity         | Positive | Set Nebulizer    | 4.0 Bar   |
| Focus       | Active   | Set Capillary        | 4000 V   | Set Dry Heater   | 200 °C    |
| Scan Begin  | 50 m/z   | Set End Plate Offset | -500 V   | Set Dry Gas      | 2.0 l/min |
| Scan End    | 1000 m/z | Set Charging Voltage | -2000 V  | Set Divert Valve | Source    |
|             |          | Set Corona           | 4000 mA  | Set APCI Heater  | 450 °C    |

---

**\*MS, 3.6-9.5min #215-564**

\*MS, 3.6-9.5min #215-564

| Mass, m/z | # | Ion Formula | m/z      | err [ppm] | mSigma | # | mSigma | Score | rdb  | c | Conf | N-Rule | [err][Da] |
|-----------|---|-------------|----------|-----------|--------|---|--------|-------|------|---|------|--------|-----------|
| 321.3122  | 1 | C22H41O     | 321.3152 | 9.2       | 589.5  | 1 | 100.00 | 2.5   | even |   | ok   |        | 2.9       |

Figure S58.  $^1\text{H}$  NMR spectrum of docos-(4*E*,15*Z*)-dien-1-yn-3-one (**10**) in  $\text{CDCl}_3$

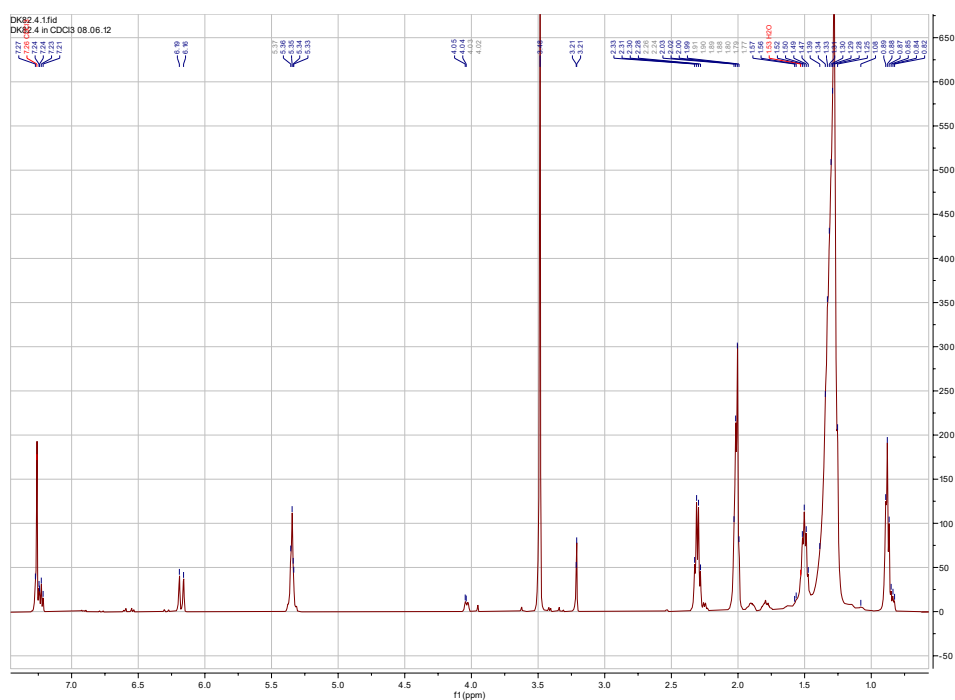

Figure S59.  $^{13}\text{C}$  NMR spectrum of docos-(4*E*,15*Z*)-dien-1-yn-3-one (**10**) in  $\text{CDCl}_3$

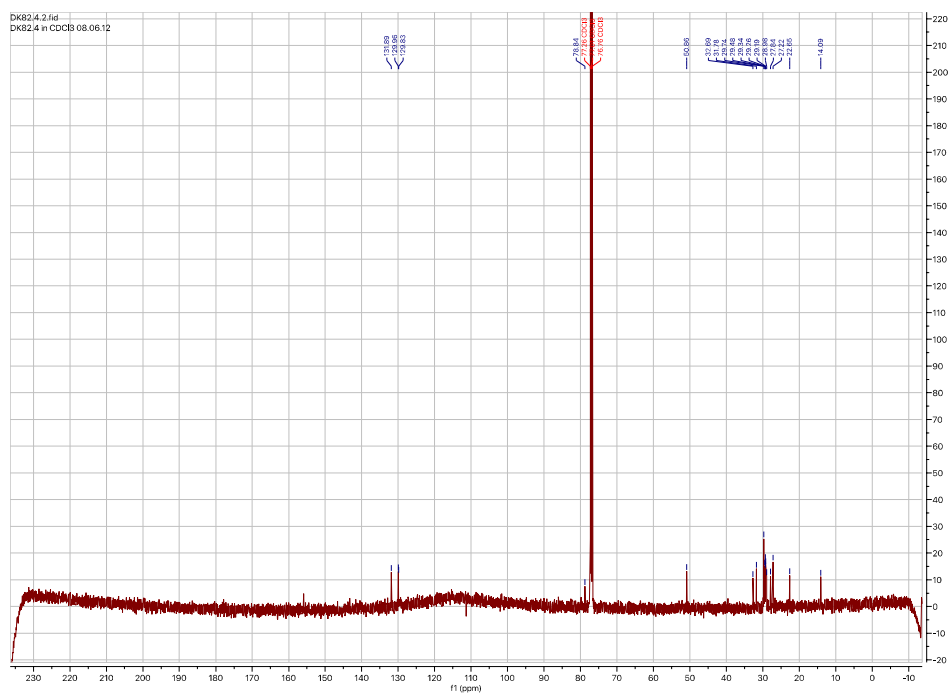



Figure S60. HSQC spectrum of docos-(4*E*,15*Z*)-dien-1-yn-3-one (**10**) in CDCl<sub>3</sub>

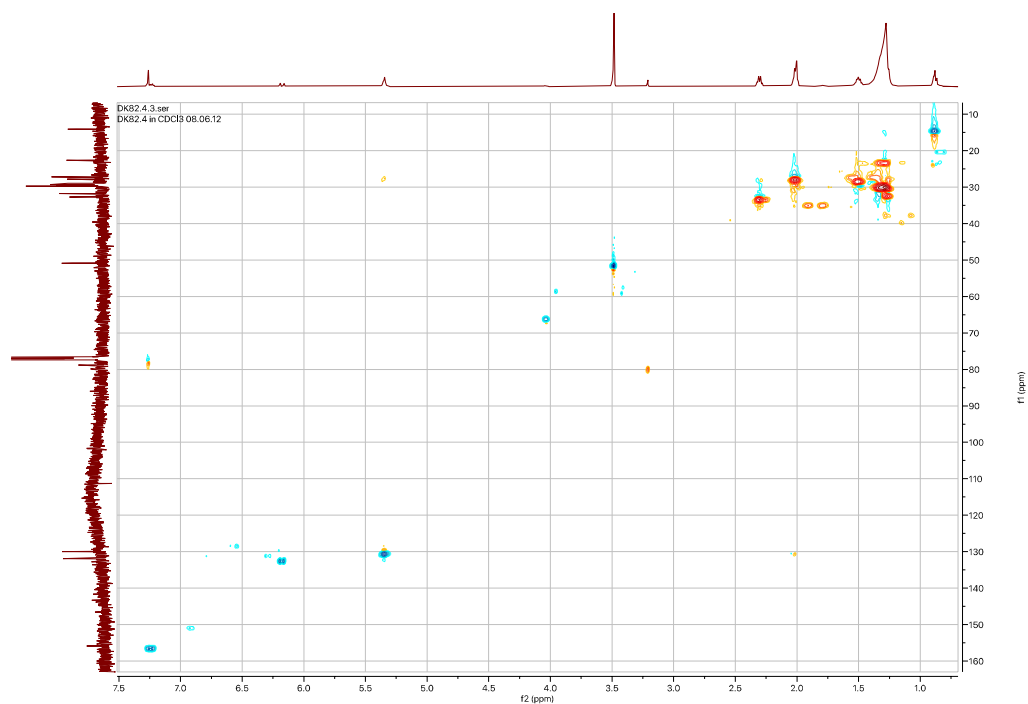

Figure S61. HMBC spectrum of docos-(4*E*,15*Z*)-dien-1-yn-3-one (**10**) in CDCl<sub>3</sub>

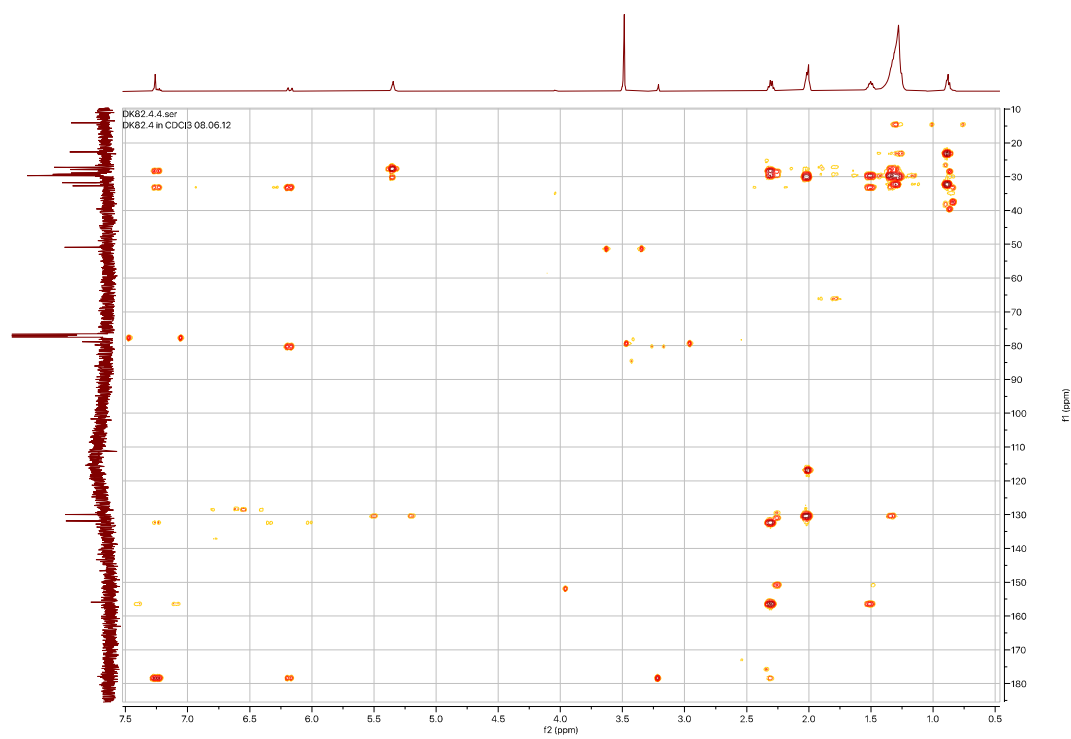

Figure S62. COSY spectrum of docos-(4*E*,15*Z*)-dien-1-yn-3-one (**10**) in CDCl<sub>3</sub>

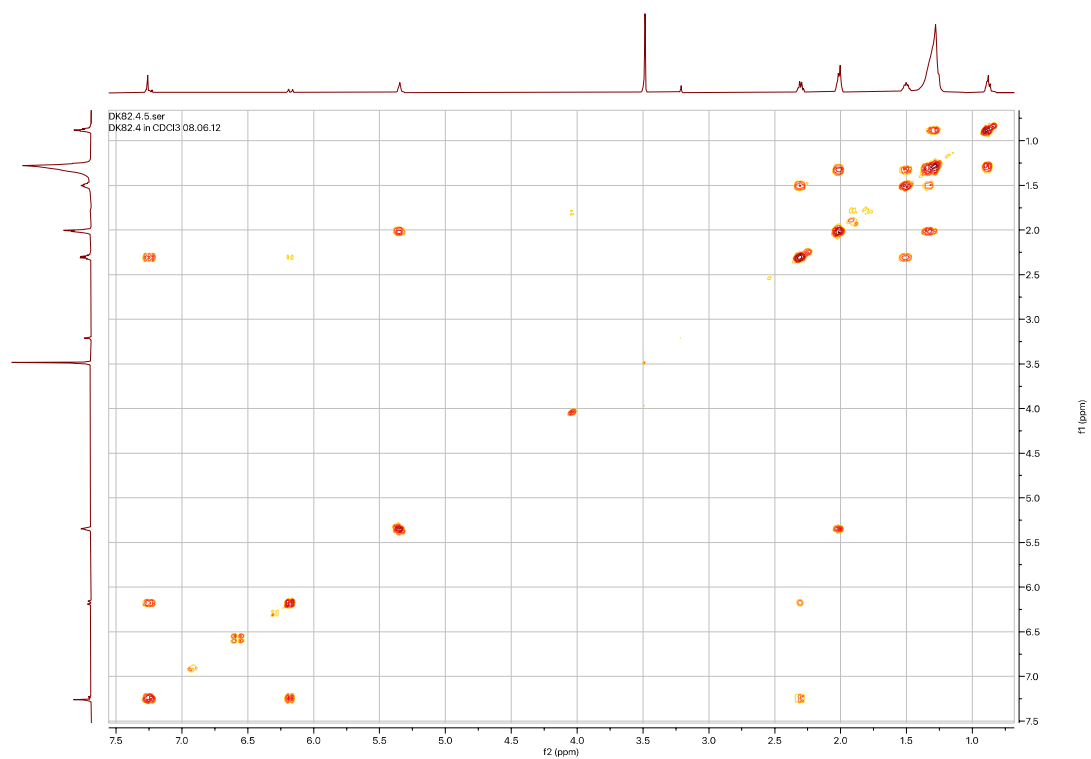

Table S10. NMR data of docos-(4*E*,15*Z*)-dien-1-yn-3-one (**10**) in CDCl<sub>3</sub>.<sup>a</sup>

| Position | $\delta_{\text{C}}$ , mult. <sup>b</sup>      | $\delta_{\text{H}}$ , mult. $J$ (Hz) | LR H-C Correlations <sup>c</sup> |
|----------|-----------------------------------------------|--------------------------------------|----------------------------------|
| 1        | 78.8 <sup>d</sup> CH                          | 3.20 s                               | -                                |
| 2        | 79.8 <sup>e</sup> qC                          | -                                    | 1, 4                             |
| 3        | 177.9 qC                                      | -                                    | 1, 4, 5                          |
| 4        | 131.9 CH                                      | 6.17 d (16.0)                        | 6                                |
| 5        | 155.9 CH                                      | 7.23 dt (16.0, 7.0)                  | 6, 7                             |
| 6        | 32.7 CH <sub>2</sub>                          | 2.30 q (7.0)                         | 4, 5, 7, 8                       |
| 7        | 27.8 CH <sub>2</sub>                          | 1.50 tt (7.0, 7.0)                   | 5, 6, 8                          |
| 8        | 29.2 CH <sub>2</sub>                          | 1.30 m                               |                                  |
| 9-13     | ~29.6 <sup>f</sup> 5 $\times$ CH <sub>2</sub> | 1.23 – 1.35 brn                      |                                  |
| 14       | 27.2 CH <sub>2</sub>                          | 2.02 m                               | 13, 15                           |
| 15       | 129.8 CH                                      | 5.35 m                               | 13, 14                           |
| 16       | 129.9 CH                                      | 5.35 m                               | 17, 18                           |
| 17       | 27.2 CH <sub>2</sub>                          | 2.02 m                               | 16, 18                           |
| 18-19    | 29.6 <sup>f</sup> 2 $\times$ CH <sub>2</sub>  | 1.23 – 1.35 brn                      |                                  |
| 20       | 31.8 CH <sub>2</sub>                          | 1.27 m                               | 19, 21a, 21b, 22                 |
| 21a      | 22.6 CH <sub>2</sub>                          | 1.31 m                               | 20, 22                           |
| b        |                                               | 1.27 m                               |                                  |
| 22       | 14.1 CH <sub>3</sub>                          | 0.88 t (6.7)                         | 20, 21a, 21b                     |

<sup>a</sup>500.13 MHz for <sup>1</sup>H and 125.76 MHz for <sup>13</sup>C; <sup>b</sup>Multiplicity and assignment from HSQC experiment;<sup>c</sup>Determined from HMBC experiment; <sup>d</sup><sup>1</sup>*J* = 254.6 Hz; <sup>e</sup><sup>2</sup>*J* = 47.6 Hz; <sup>f</sup>Exact <sup>13</sup>C chemical shifts 29.25, 29.33, 29.47, 29.73 ( $\times$  4) ppm.

Figure S63. EIMS and fragmentation pattern of docos-(4*E*,15*Z*)-dien-1-yn-3-one (**10**)

Print Date: 12 Jun 2012 16:06:45

MS Data Review Active Chromatogram and Spectrum Plots - 12/06/2012 16:06

File: c:\varian\ms\data\2000.40080.sms

Sample: Manual Sample

Scan Range: 1 - 1255 Time Range: 0.00 - 22.50 min.

Operator:

Date: 12/06/2012 15:46

DX 82/4

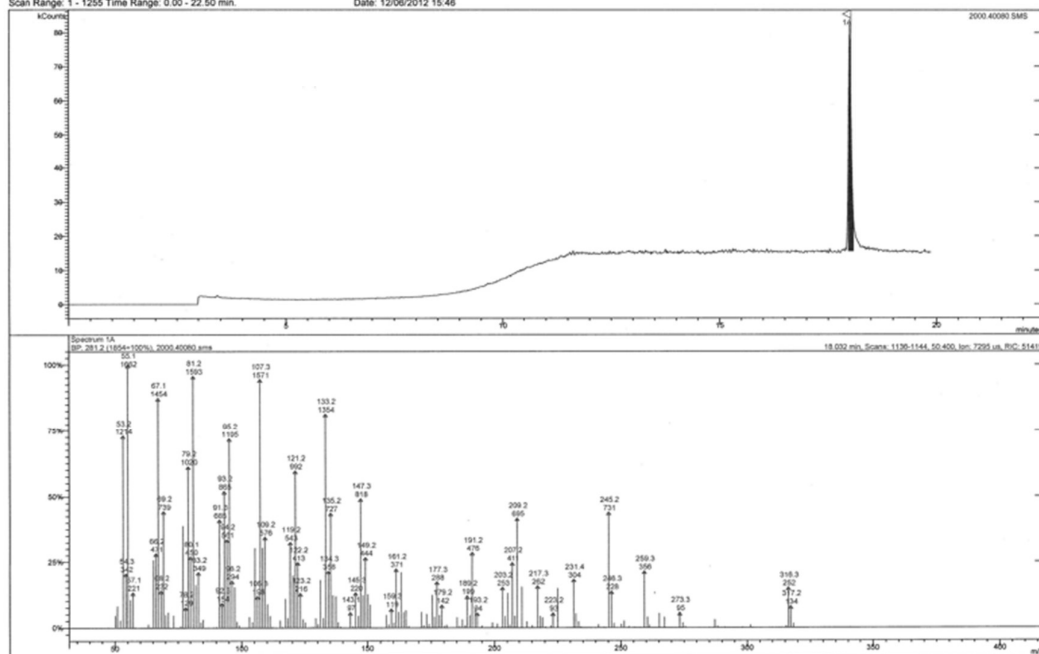

Figure S64. LCMS chromatogram and mass spectrum of the periodate-permanganate oxidation products of docos-(4*E*,15*Z*)-dien-1-yn-3-one (**10**). 2 Minutes gradient from 100% solvent A (95% H<sub>2</sub>O, 5% ACN, 0.1% FA) to 100% of solvent B (99.9% ACN, 0.1% FA) and then isocratic elution in 100% of solvent B for 2 more minutes.

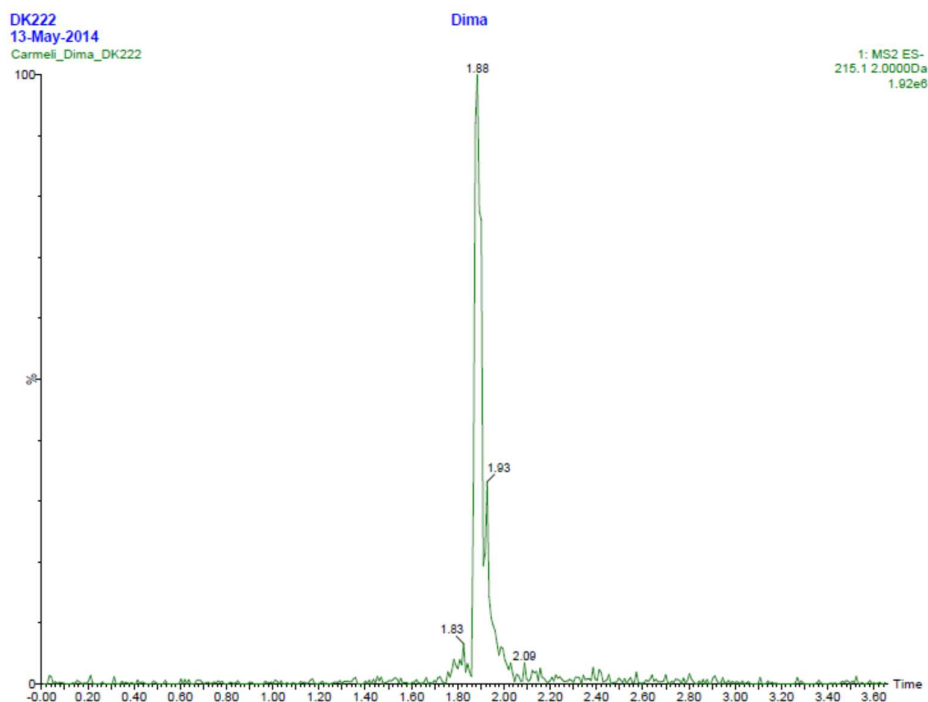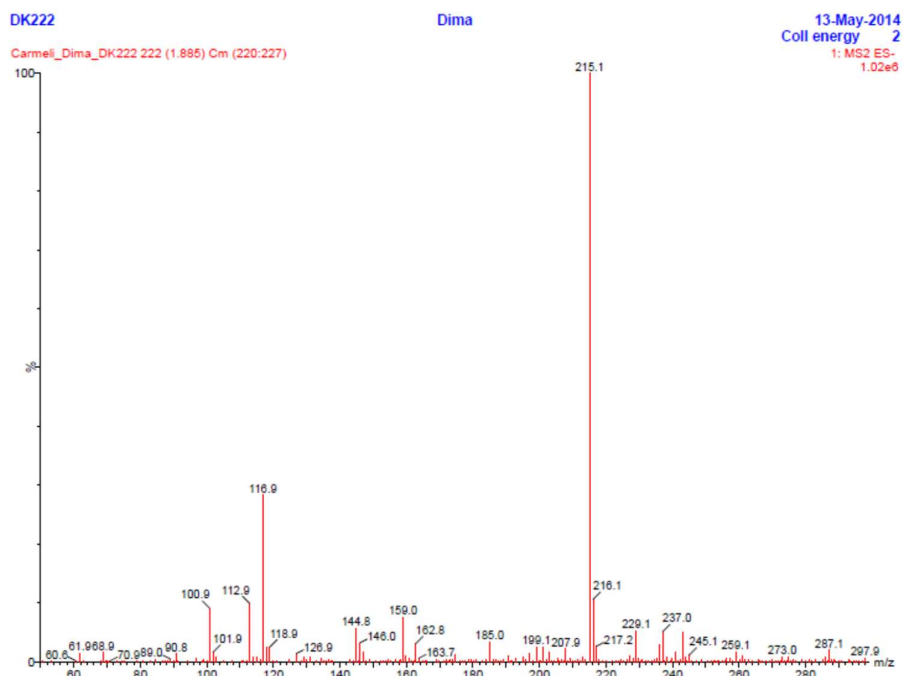

Figure S65.  $^1\text{H}$  NMR spectrum of (3*R*)-docos-(15*Z*)- en-1-yn-3-ol (**11**) in  $\text{CDCl}_3$

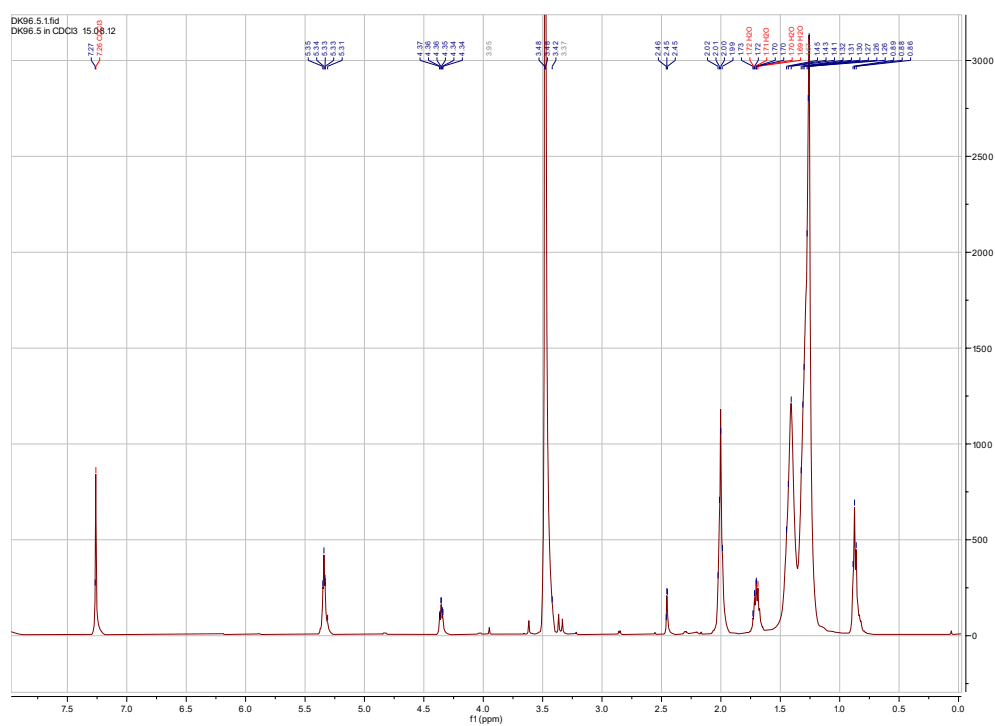

Figure S66.  $^{13}\text{C}$  NMR spectrum of (3*R*)-docos-(15*Z*)- en-1-yn-3-ol (**11**) in  $\text{CDCl}_3$

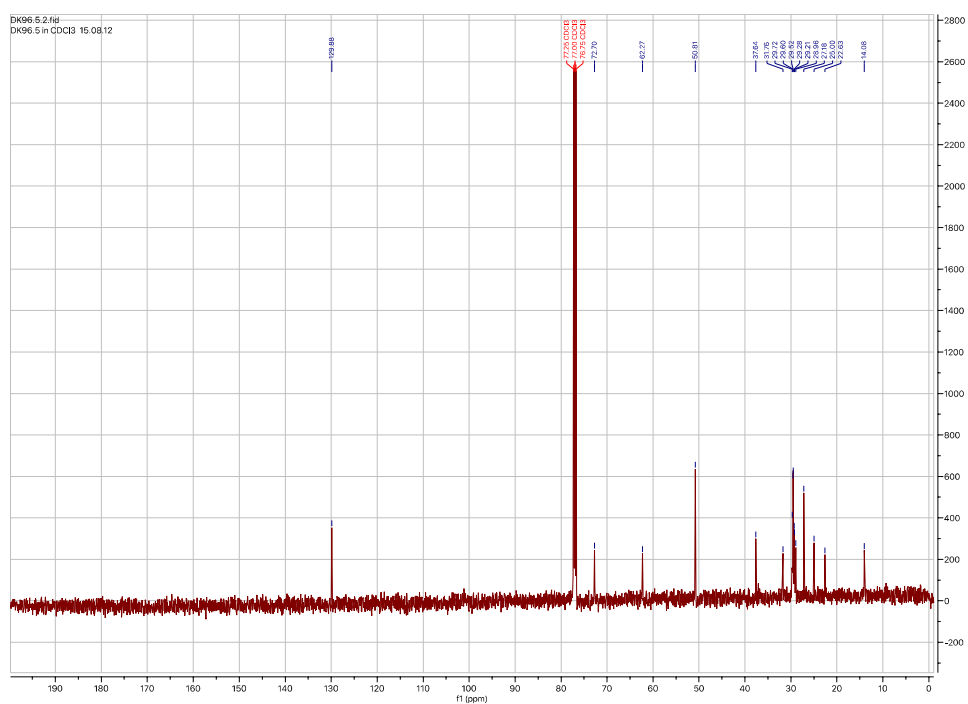

Table S11. NMR data of (3*R*)-docos-(15*Z*)- en-1-yn-3-ol (**11**) in CDCl<sub>3</sub>.<sup>a</sup>

| Position | $\delta_{\text{C}}$ , mult. <sup>b</sup> | $\delta_{\text{H}}$ , mult. $J$ (Hz) | LR H-C Correlations <sup>c</sup> |
|----------|------------------------------------------|--------------------------------------|----------------------------------|
| 1        | 72.6 <sup>d</sup> CH                     | 2.45 d (2.0)                         | 3                                |
| 2        | 85.0 <sup>e</sup> qC                     | -                                    | 1, 3, 4                          |
| 3        | 62.3 CH                                  | 4.36 td (6.5, 2.0)                   | 1, 4                             |
| 4        | 37.6 CH <sub>2</sub>                     | 1.70 m                               | 3, 6                             |
| 5        | 25.0 CH <sub>2</sub>                     | 1.41 m                               | 3, 4, 6                          |
| 6        | 29.0 CH <sub>2</sub>                     | 1.26 m                               | 4, 5                             |
| 7-13     | $\sim 29.6^f 7 \times \text{CH}_2$       | 1.22 – 1.31 brm                      |                                  |
| 14       | 27.2 CH <sub>2</sub>                     | 2.01 m                               | 13, 15                           |
| 15       | 129.9 CH                                 | 5.34 t (4.5)                         | 13, 14                           |
| 16       | 129.9 CH                                 | 5.34 t (4.5)                         | 17, 18                           |
| 17       | 27.2 CH <sub>2</sub>                     | 2.01 m                               | 16, 18                           |
| 18-19    | $29.6^f 2 \times \text{CH}_2$            | 1.22 – 1.31 brm                      |                                  |
| 20       | 31.8 CH <sub>2</sub>                     | 1.25 m                               | 19, 21a, 21b, 22                 |
| 21a      | 22.6 CH <sub>2</sub>                     | 1.33 m                               | 20, 22                           |
| b        |                                          | 1.28 m                               |                                  |
| 22       | 14.1 CH <sub>3</sub>                     | 0.87 t (7.0)                         | 20, 21a, 21b                     |

<sup>a</sup>500.13 MHz for <sup>1</sup>H and 125.76 MHz for <sup>13</sup>C; <sup>b</sup>Multiplicity and assignment from HSQC experiment;<sup>c</sup>Determined from HMBC experiment; <sup>d</sup> $^1J = 251.0$  Hz; <sup>e</sup> $^2J = 46.0$  Hz; <sup>f</sup>Exact <sup>13</sup>C chemical shifts 29.21, 29.49, 29.52 ( $\times 3$ ), 29.60 ( $\times 2$ ), 29.72, 29.74 ppm.Figure S67. EIMS of (3*R*)-docos-(15*Z*)- en-1-yn-3-ol (**11**)

Print Date: 14 Aug 2012 11:41:52

MS Data Review Active Chromatogram and Spectrum Plots - 14/08/2012 11:41

Dk 94/c

File: c:\varian\ms\data\2000.40098.sms

Sample: Manual Sample

Scan Range: 1 - 1124 Time Range: 0.00 - 25.00 min.

Operator:

Date: 14/08/2012 11:22

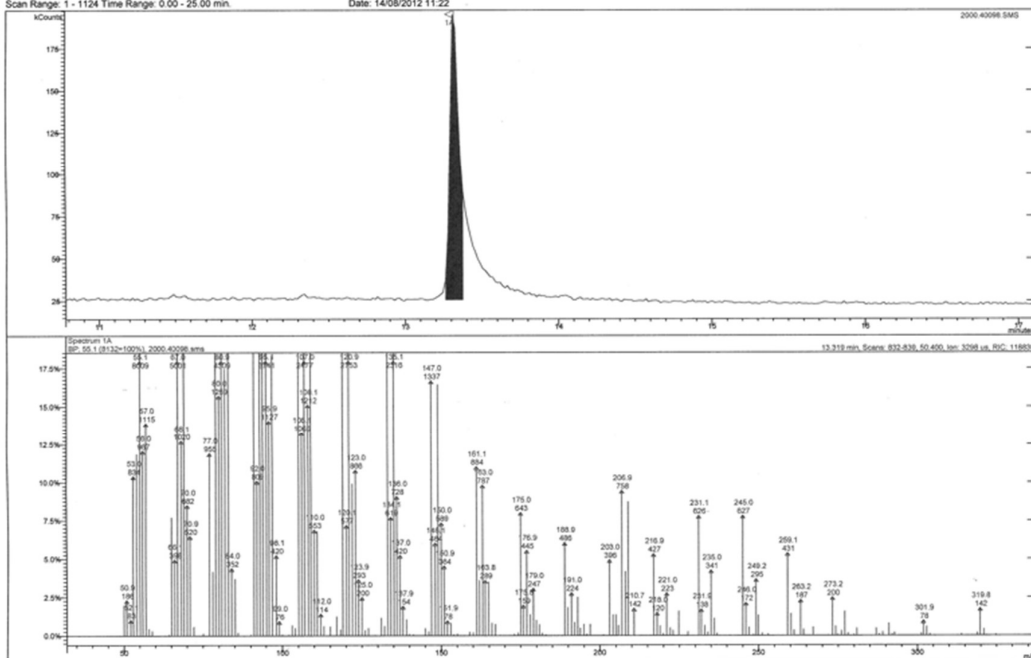



Figure S68.  $^1\text{H}$  NMR spectrum of (3*R*)-tetracos-(4*E*,15*Z*)-dien-1-yn-3-ol (**12**) in  $\text{CDCl}_3$

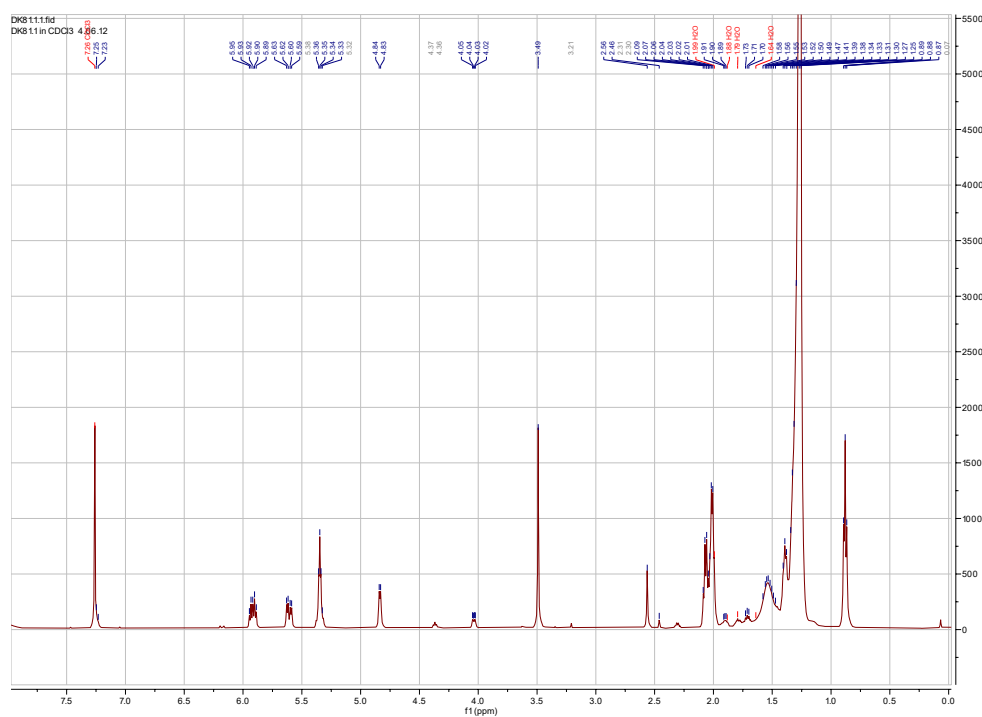

Figure S69.  $^{13}\text{C}$  NMR spectrum of (3*R*)-tetracos-(4*E*,15*Z*)-dien-1-yn-3-ol (**12**) in  $\text{CDCl}_3$

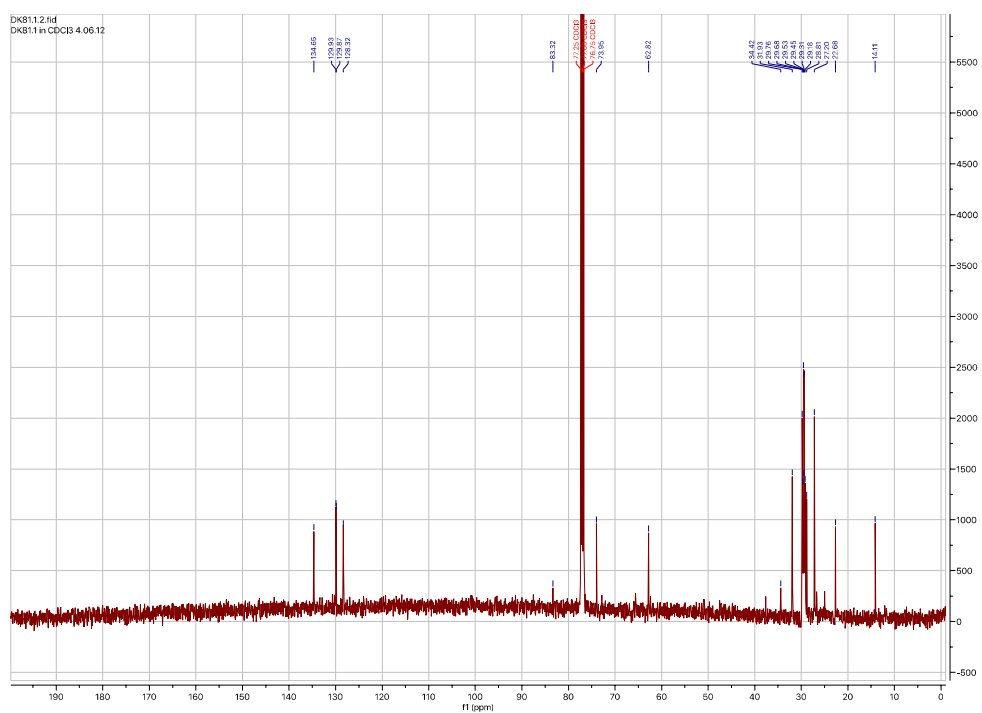

Figure S70. HSQC spectrum of (3*R*)-tetracos-(4*E*,15*Z*)-dien-1-yn-3-ol (**12**) in CDCl<sub>3</sub>

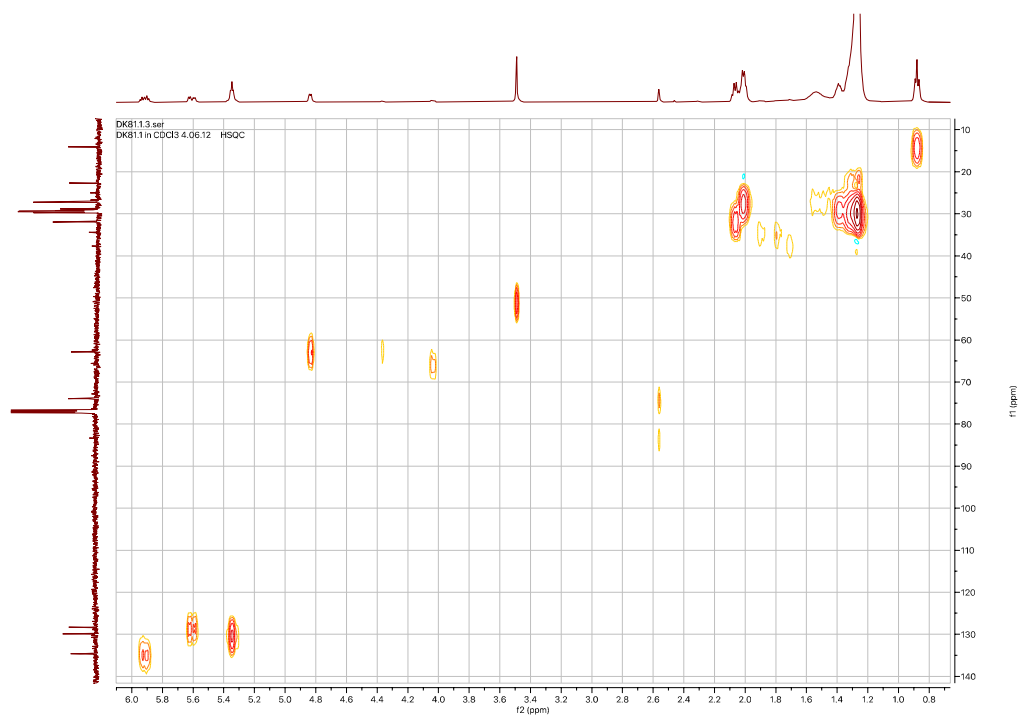

Figure S71. HMBC spectrum of (3*R*)-tetracos-(4*E*,15*Z*)-dien-1-yn-3-ol (**12**) in CDCl<sub>3</sub>

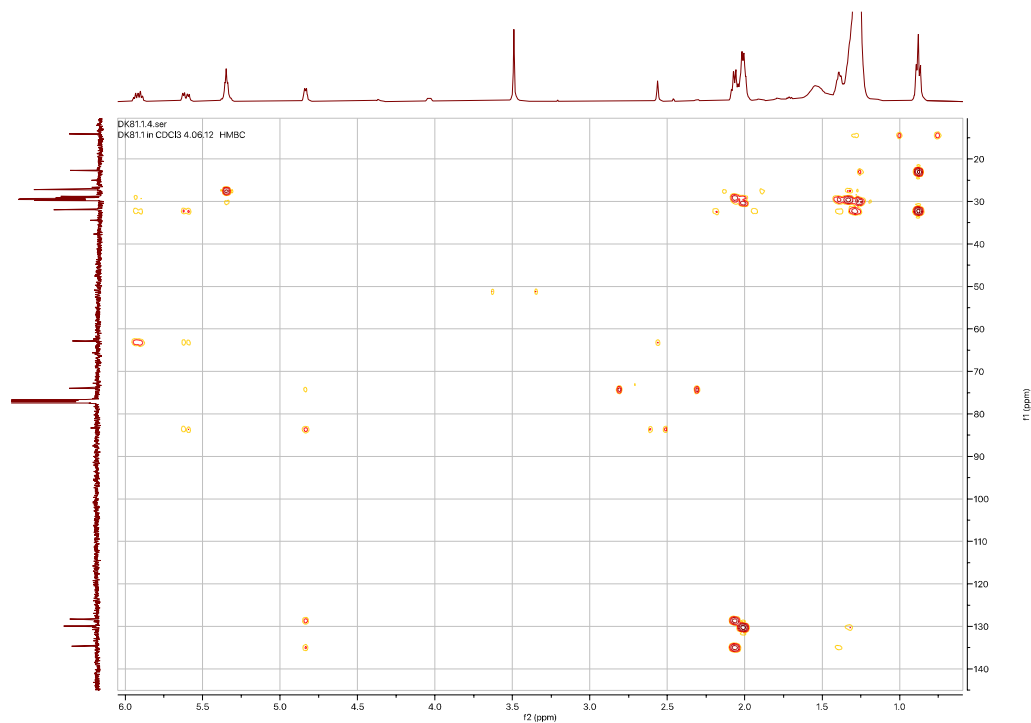

Figure S72. COSY spectrum of (3*R*)-tetracos-(4*E*,15*Z*)-dien-1-yn-3-ol (**12**) in CDCl<sub>3</sub>

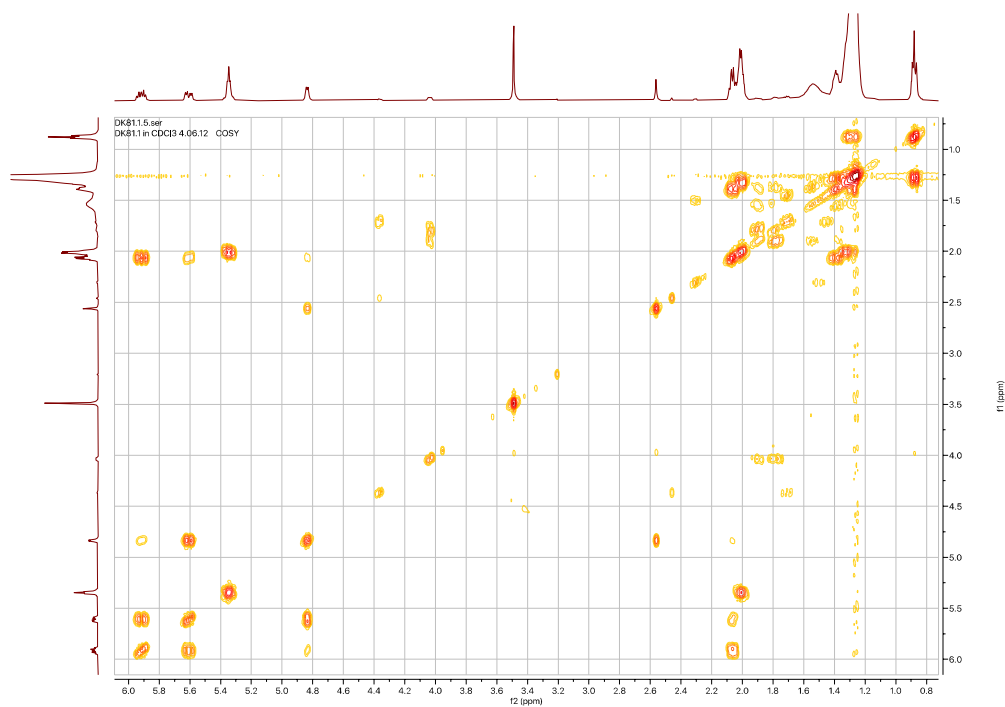

Figure S73. DEPT spectrum of (3*R*)-tetracos-(4*E*,15*Z*)-dien-1-yn-3-ol (**12**) in CDCl<sub>3</sub>

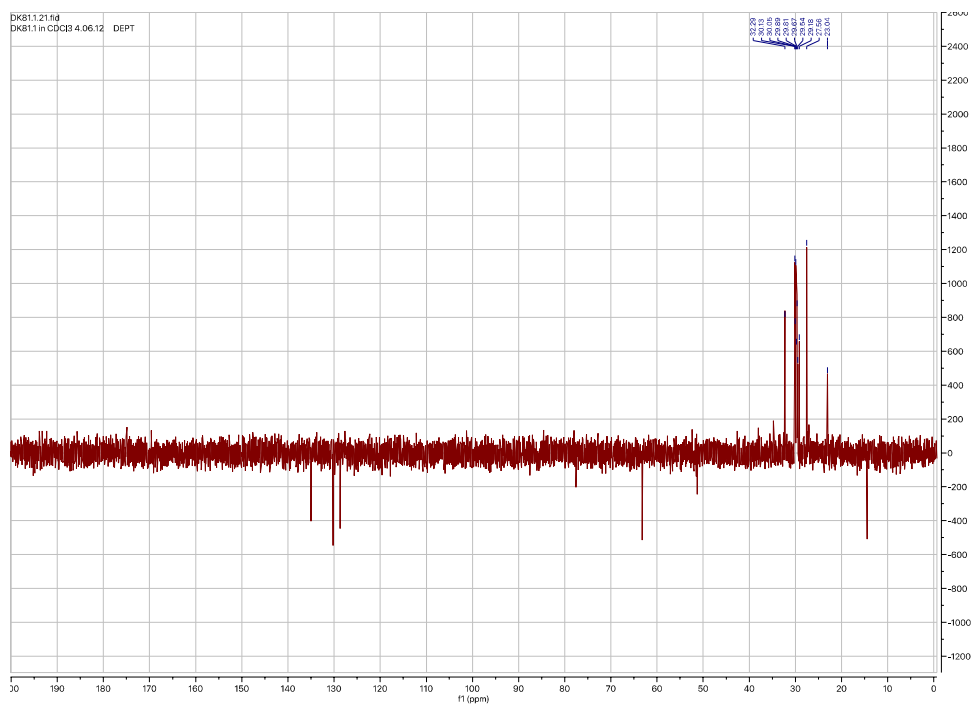

Table S12. NMR data of (3*R*)-tetracos-(4*E*,15*Z*)-dien-1-yn-3-ol (**12**) in CDCl<sub>3</sub>.<sup>a</sup>

| Position | $\delta_{\text{C}}$ , mult. <sup>b</sup>    | $\delta_{\text{H}}$ , mult. $J$ (Hz) | LR H-C Correlations <sup>c</sup> |
|----------|---------------------------------------------|--------------------------------------|----------------------------------|
| 1        | 73.9 <sup>d</sup> CH                        | 2.56 brs                             | 3                                |
| 2        | 83.4 <sup>e</sup> qC                        | -                                    | 1, 3, 4                          |
| 3        | 62.8 CH                                     | 4.83 brd (6.0)                       | 1, 4, 5                          |
| 4        | 128.3 CH                                    | 5.60 dd (15.3, 6.0)                  | 3, 6                             |
| 5        | 134.6 CH                                    | 5.91 dt (15.3, 7.1)                  | 3, 6, 7                          |
| 6        | 31.9 CH <sub>2</sub>                        | 2.06 q (7.1)                         | 4, 5, 7, 8                       |
| 7        | 28.8 CH <sub>2</sub>                        | 1.38 m                               | 5, 6, 8                          |
| 8-13     | $\sim 29.6^{\text{f}} 6 \times \text{CH}_2$ | 1.22 – 1.32 brm                      |                                  |
| 14       | 27.2 CH <sub>2</sub>                        | 2.01 m                               | 13, 15                           |
| 15       | 129.9 CH                                    | 5.34 t (5.0)                         | 13, 14                           |
| 16       | 129.9 CH                                    | 5.34 t (5.0)                         | 17, 18                           |
| 17       | 27.2 CH <sub>2</sub>                        | 2.01 m                               | 16, 18                           |
| 18-21    | $29.6^{\text{f}} 4 \times \text{CH}_2$      | 1.22 – 1.32 brm                      |                                  |
| 22       | 31.9 CH <sub>2</sub>                        | 1.25 m                               | 21, 23a, 23b, 24                 |
| 23a      | 22.7 CH <sub>2</sub>                        | 1.32 m                               | 22, 24                           |
| b        |                                             | 1.28 m                               |                                  |
| 24       | 14.1 CH <sub>3</sub>                        | 0.88 t (6.7)                         | 22, 21a, 21b                     |

<sup>a</sup>500.13 MHz for <sup>1</sup>H and 125.76 MHz for <sup>13</sup>C; <sup>b</sup>Multiplicity and assignment from HSQC experiment;<sup>c</sup>Determined from HMBC experiment; <sup>d</sup><sup>1</sup>*J* = 251.5 Hz; <sup>e</sup><sup>2</sup>*J* = 49.4 Hz; <sup>f</sup>Exact <sup>13</sup>C chemical shifts 29.18, 29.31 (× 2), 29.45, 29.52 (× 4), 29.68, 29.76 ppm.

Figure S74. EIGCMS spectrum of (3*R*)-tetracos-(4*E*,15*Z*)-dien-1-yn-3-ol (**12**)

File : C:\MSDCHEM\1\DATA\SMB DATA 7\_11\Snapshot\AVIV888.D  
 Operator :  
 Acquired : 21 Mar 2012 12:28 using AcqMethod SMB GC-MS.M  
 Instrument : GC-MSD  
 Sample Name : DK72/8a  
 Misc Info : DK72/8a  
 Vial Number: 1

DK 81.1

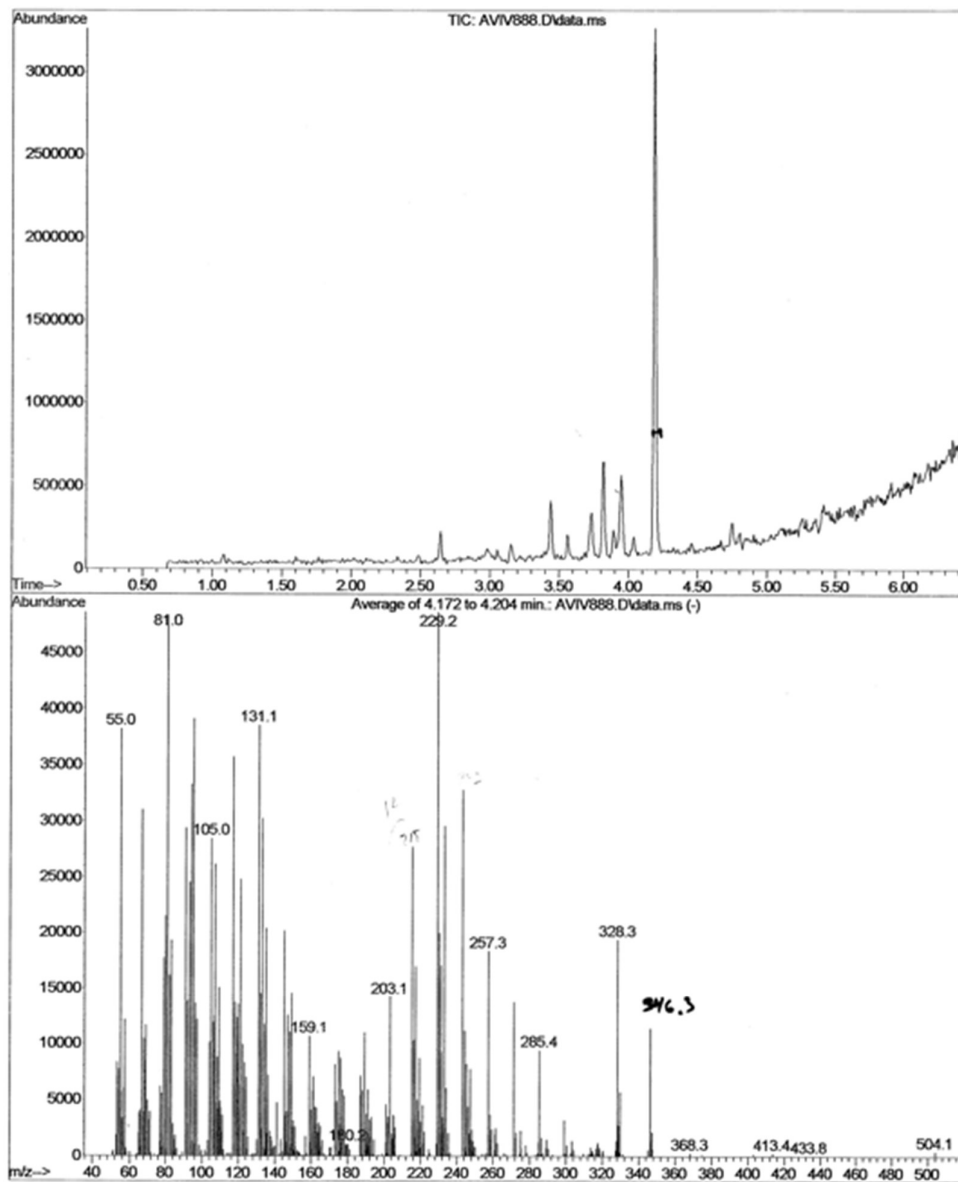

Figure S75. LCMS chromatogram and mass spectrum of the periodate-permanganate oxidation products of (3*R*)-tetracos-(4*E*,15*Z*)-dien-1-yn-3-ol (**12**). 2 Minutes gradient from 100% solvent A (95% H<sub>2</sub>O, 5% ACN, 0.1% FA) to 100% of solvent B (99.9% ACN, 0.1% FA) and then isocratic elution in 100% of solvent B for 2 more minutes.

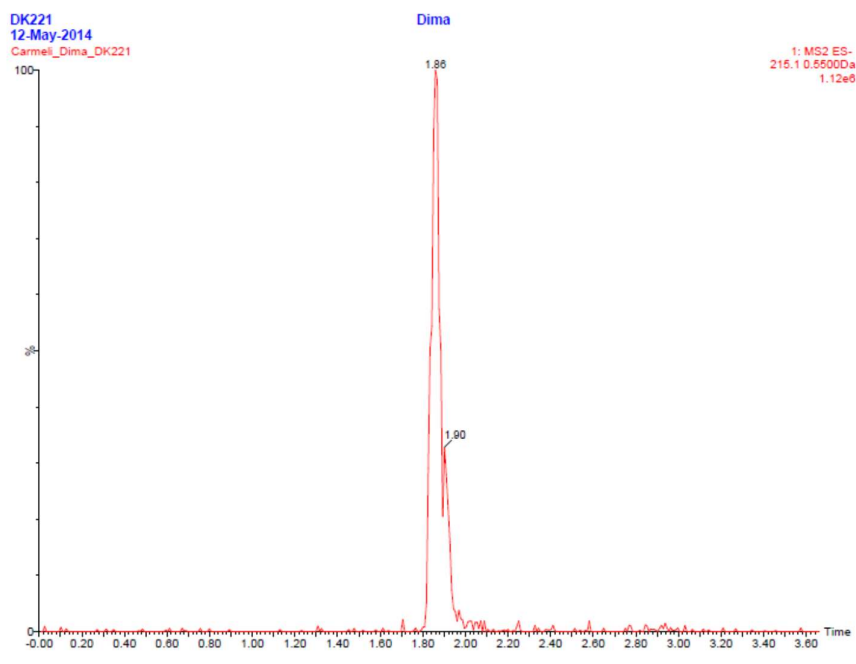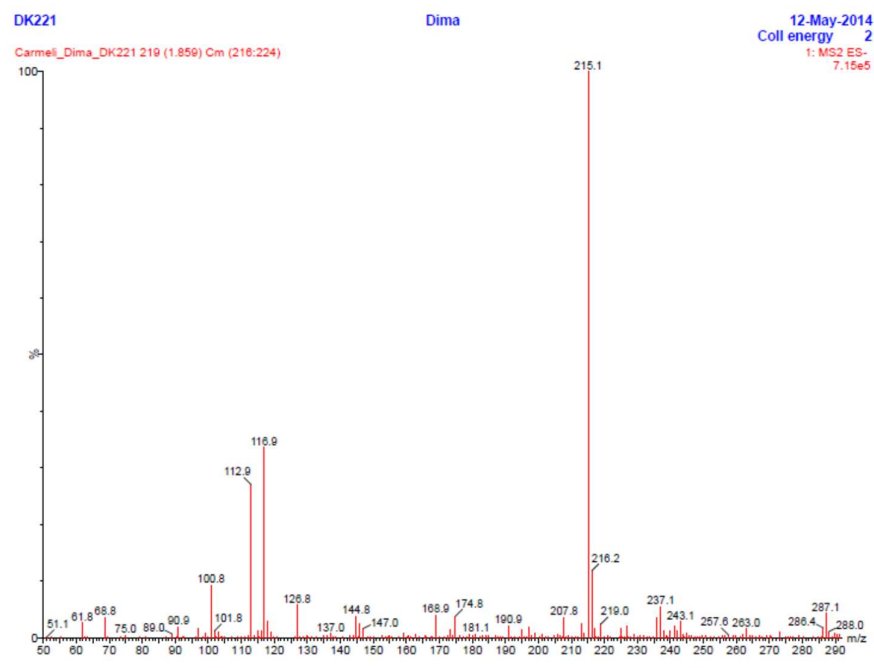

Figure S76.  $^1\text{H}$  NMR spectrum of (5*S*)-icos-(3*Z*)-en-1-yn-5-ol (**13**) in  $\text{CDCl}_3$

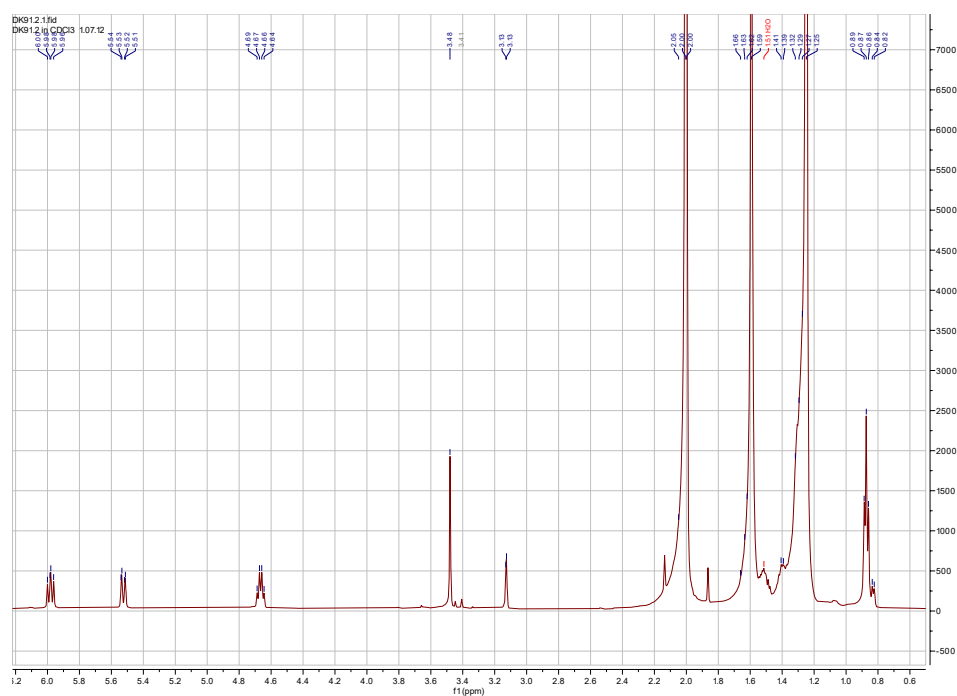

Figure S77.  $^{13}\text{C}$  NMR spectrum of (5*S*)-icos-(3*Z*)-en-1-yn-5-ol (**13**) in  $\text{CDCl}_3$

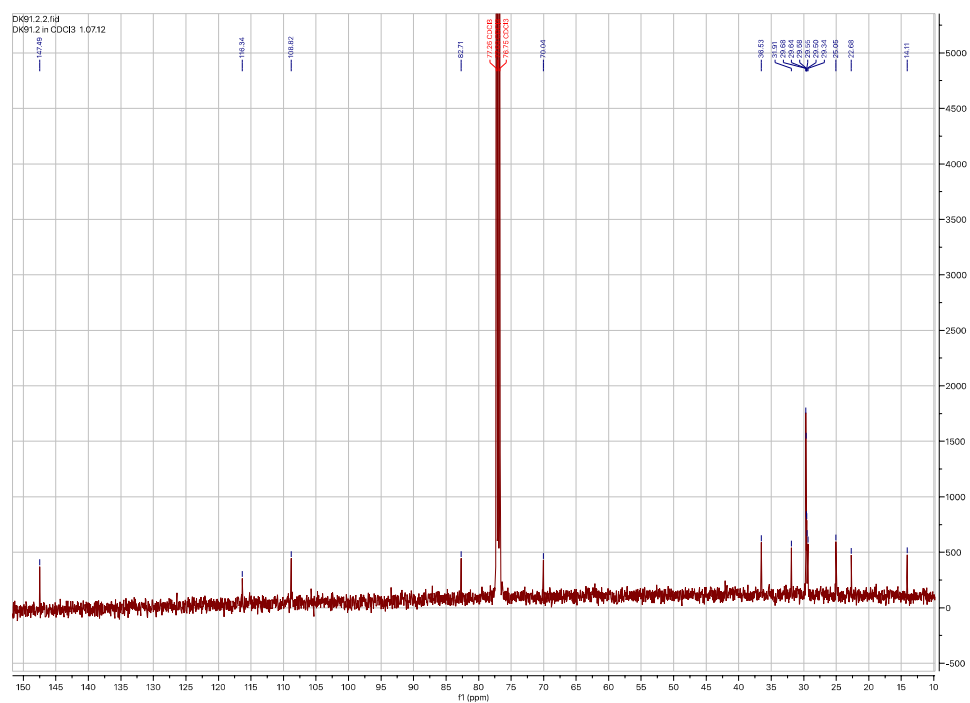

Figure S78. HSQC spectrum of (5*S*)-icos-(3*Z*)-en-1-yn-5-ol (**13**) in CDCl<sub>3</sub>

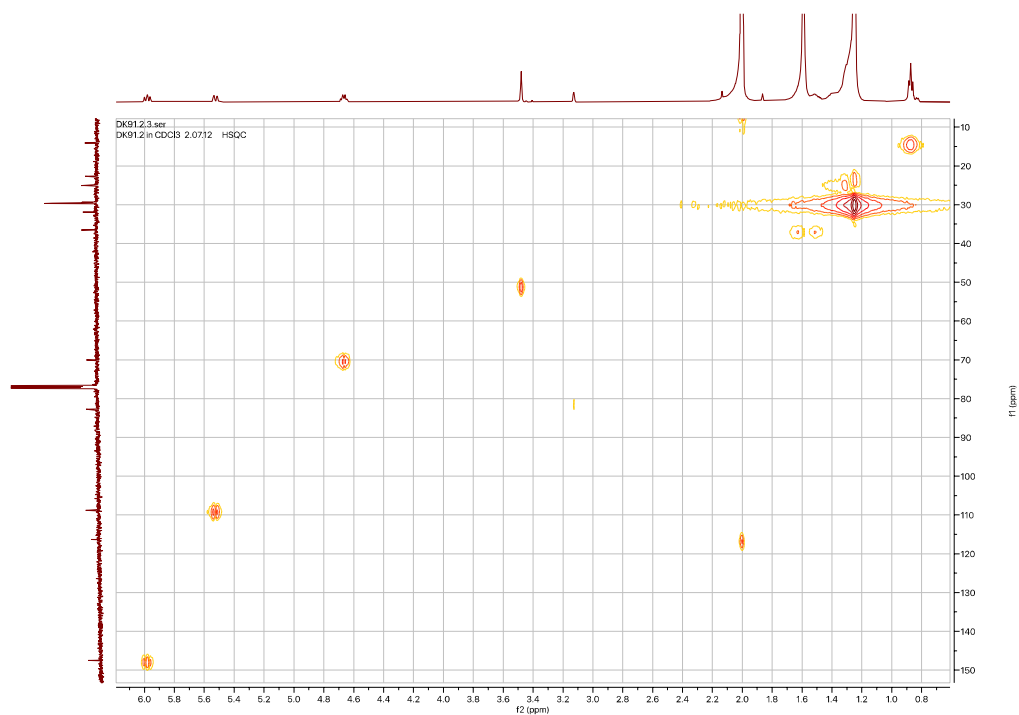

Figure S79. HMBC spectrum of (5*S*)-icos-(3*Z*)-en-1-yn-5-ol (**13**) in CDCl<sub>3</sub>

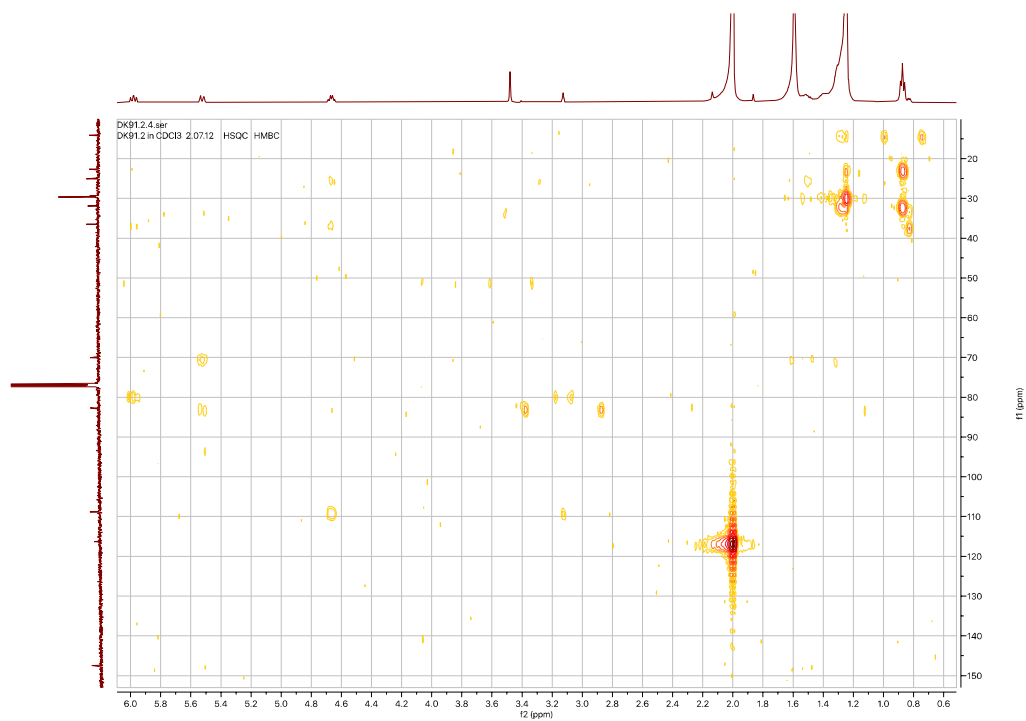



Figure S80. COSY spectrum of (5*S*)-icos-(3*Z*)-en-1-yn-5-ol (**13**) in CDCl<sub>3</sub>

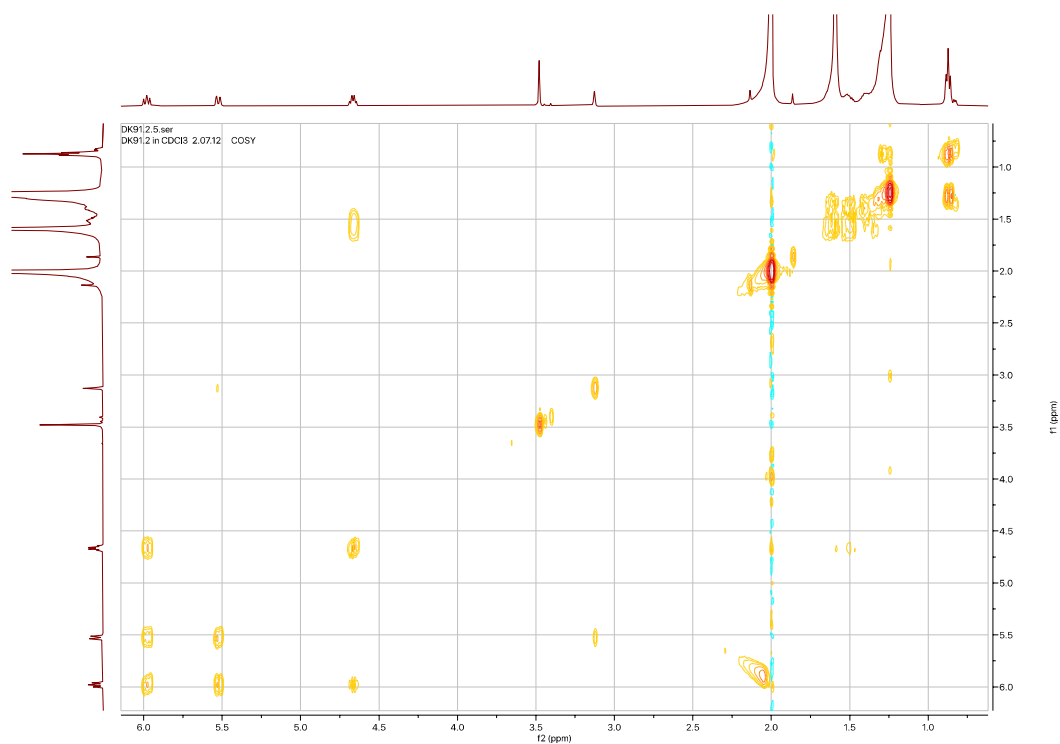

Figure S81. DEPT spectrum of (5*S*)-icos-(3*Z*)-en-1-yn-5-ol (**13**) in CDCl<sub>3</sub>

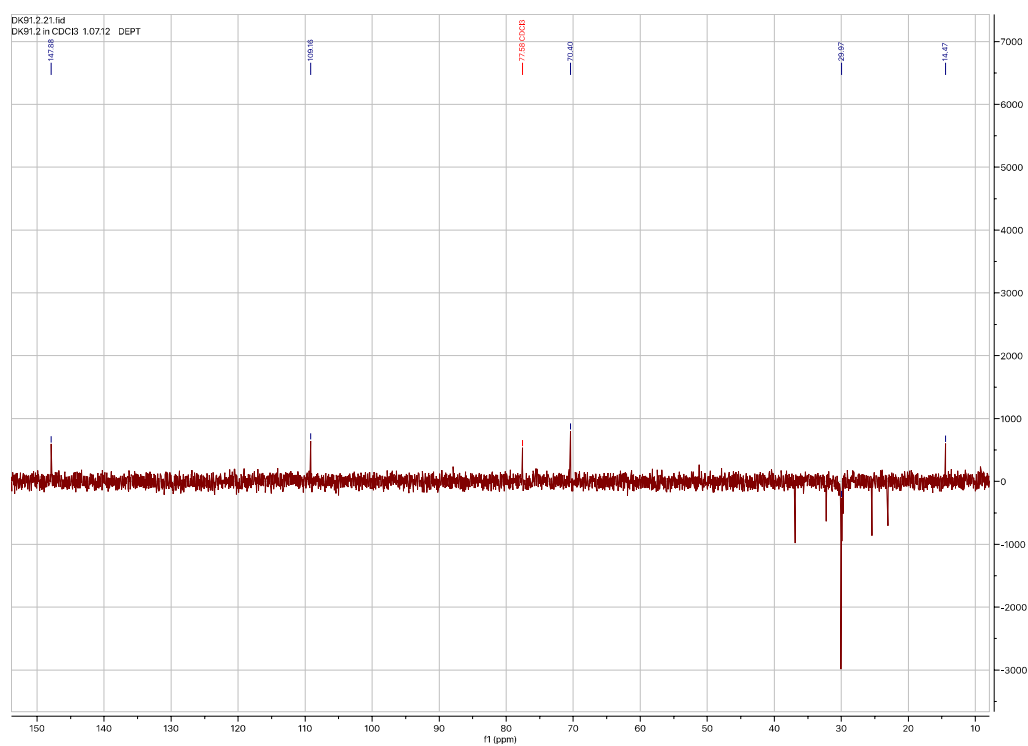

Table S13. NMR data of (5*S*)-icos-(3*Z*)-en-1-yn-5-ol (**13**) in CDCl<sub>3</sub>.<sup>a</sup>

| Position | $\delta_{\text{C}}$ , mult. <sup>b</sup> | $\delta_{\text{H}}$ , mult. $J$ (Hz) | LR H-C Correlations <sup>c</sup> |
|----------|------------------------------------------|--------------------------------------|----------------------------------|
| 1        | 82.7 <sup>d</sup> CH                     | 3.13 d (1.5)                         | 3                                |
| 2        | 79.5 <sup>e</sup> qC                     | -                                    | 1, 4                             |
| 3        | 108.8 CH                                 | 5.52 dd (11.0, 1.5)                  | 1, 4, 5                          |
| 4        | 147.5 CH                                 | 5.98 dd (11.0, 8.9)                  | 1, 3, 5, 6a, 6b                  |
| 5        | 70.0 CH                                  | 4.67 dt (8.9, 8.5)                   | 3, 4, 6a, 6b, 7a, 7b             |
| 6a       | 36.5 CH <sub>2</sub>                     | 1.61 m                               | 4, 5, 7a, 7b, 8                  |
| b        |                                          | 1.52 m                               |                                  |
| 7a       | 28.8 CH <sub>2</sub>                     | 1.41 m                               | 5, 6a, 6b, 8                     |
| b        |                                          | 1.32 m                               |                                  |
| 8-17     | $\sim 29.6^f 10 \times \text{CH}_2$      | 1.23 – 1.35 brm                      |                                  |
| 18       | 31.9 CH <sub>2</sub>                     | 1.26 m                               | 17, 19a, 19b, 20                 |
| 19a      | 22.7 CH <sub>2</sub>                     | 1.31 m                               | 18, 20                           |
| b        |                                          | 1.26 m                               |                                  |
| 20       | 14.1 CH <sub>3</sub>                     | 0.88 t (7.0)                         | 18, 19a, 19b                     |

<sup>a</sup>500.13 MHz for <sup>1</sup>H and 125.76 MHz for <sup>13</sup>C; <sup>b</sup>Multiplicity and assignment from HSQC experiment; <sup>c</sup>Determined from HMBC experiment; <sup>d</sup> $^1J = 252.0$  Hz; <sup>e</sup> $^2J = 49.1$  Hz; <sup>f</sup>Exact <sup>13</sup>C chemical shifts 29.34, 29.50, 29.54, 29.54, 29.65 ( $\times 3$ ), 29.67 ( $\times 3$ ) ppm.

Figure S82. EIGCMS spectrum of (5*S*)-icos-(3*Z*)-en-1-yn-5-ol (**13**)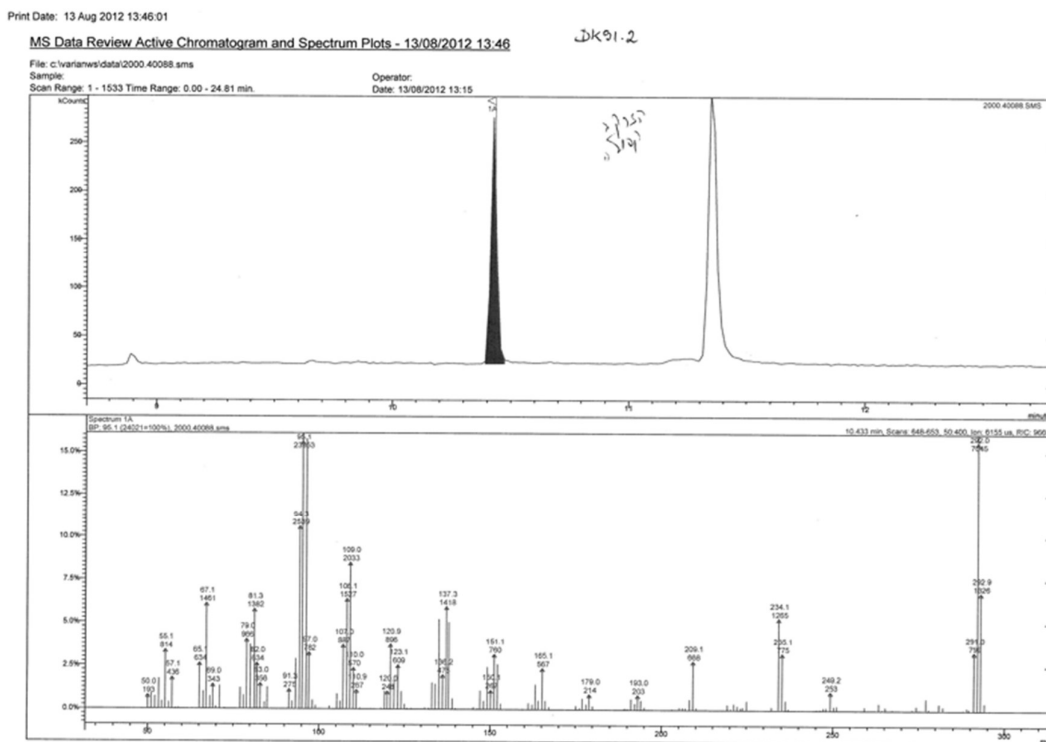

Figure S83. HRCIMS spectrum of (5*S*)-icos-(3*Z*)-en-1-yn-5-ol (**13**)

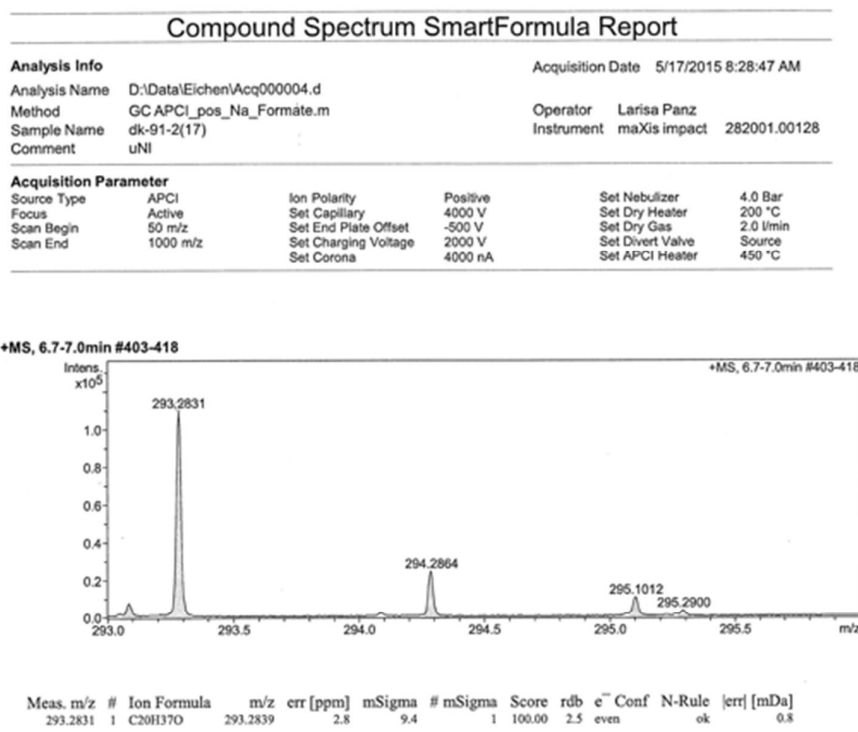

Figure S84.  $^1\text{H}$  NMR spectrum of (5*S*)-14-methylicos-(3*Z*)-en-1-yn-5-ol (**14**) in  $\text{CDCl}_3$

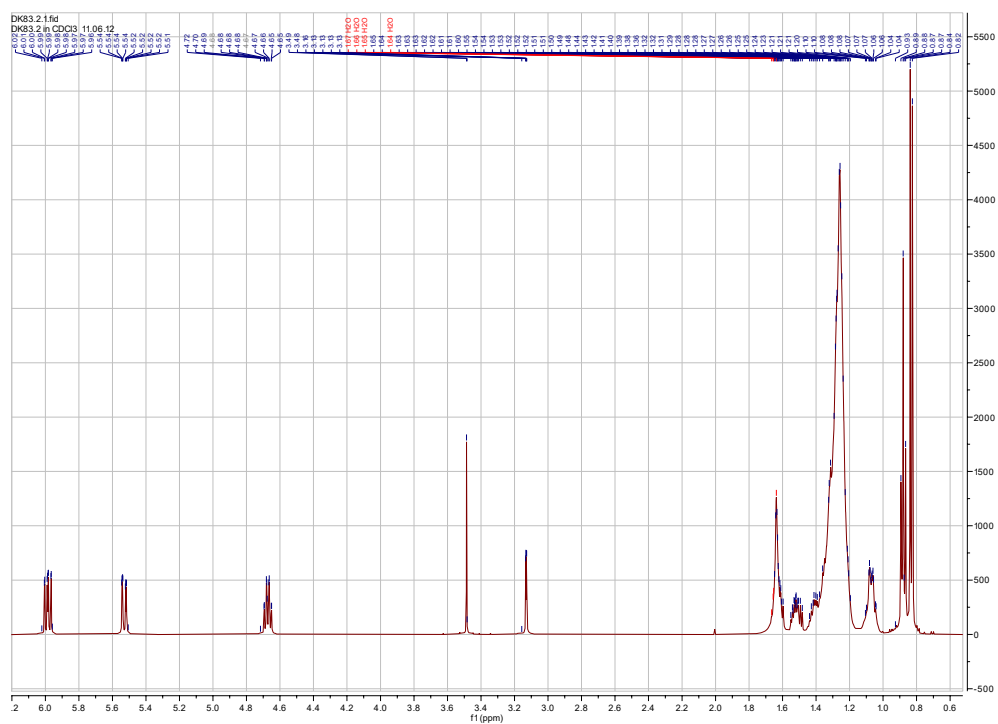

Figure S85.  $^{13}\text{C}$  NMR spectrum of (5*S*)-14-methylicos-(3*Z*)-en-1-yn-5-ol (**14**) in  $\text{CDCl}_3$

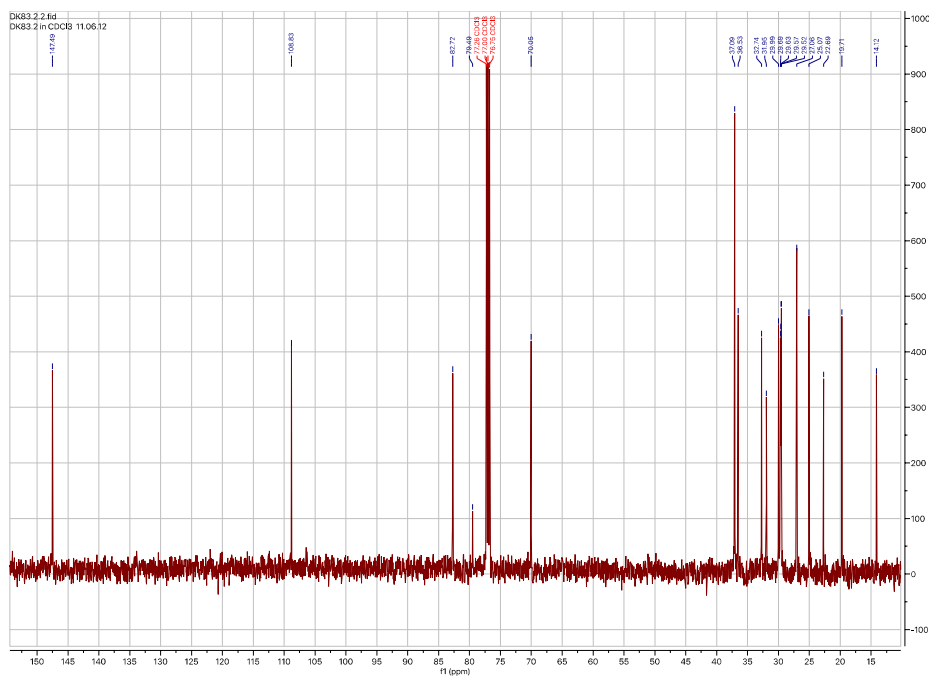

Figure S86. HSQC spectrum of (5*S*)-14-methylicos-(3*Z*)-en-1-yn-5-ol (**14**) in CDCl<sub>3</sub>

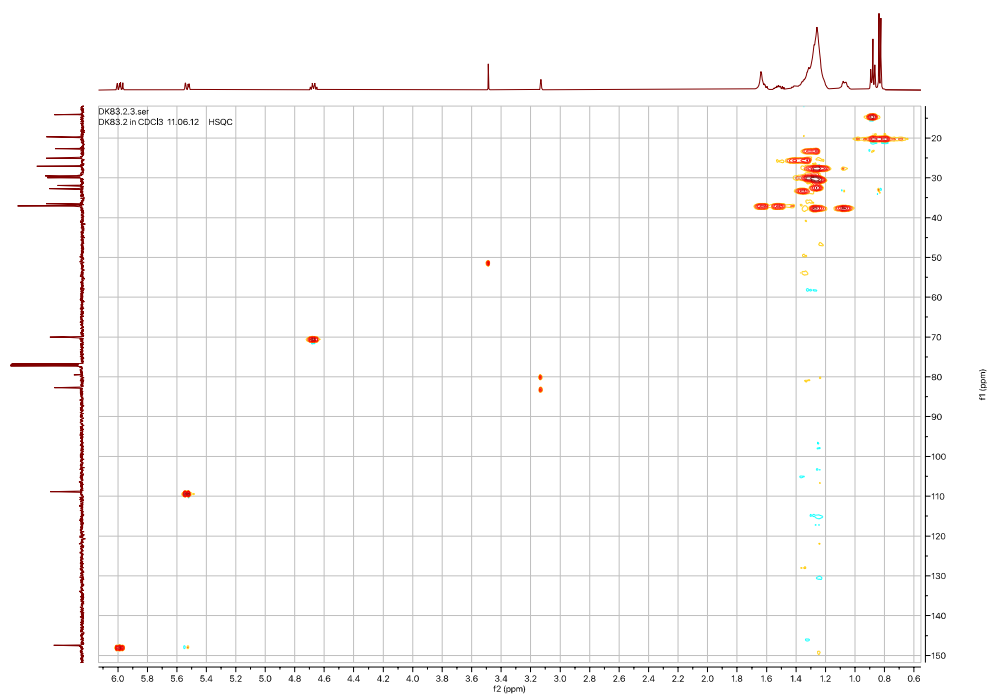

Figure S87. HMBC spectrum of (5*S*)-14-methylicos-(3*Z*)-en-1-yn-5-ol (**14**) in CDCl<sub>3</sub>

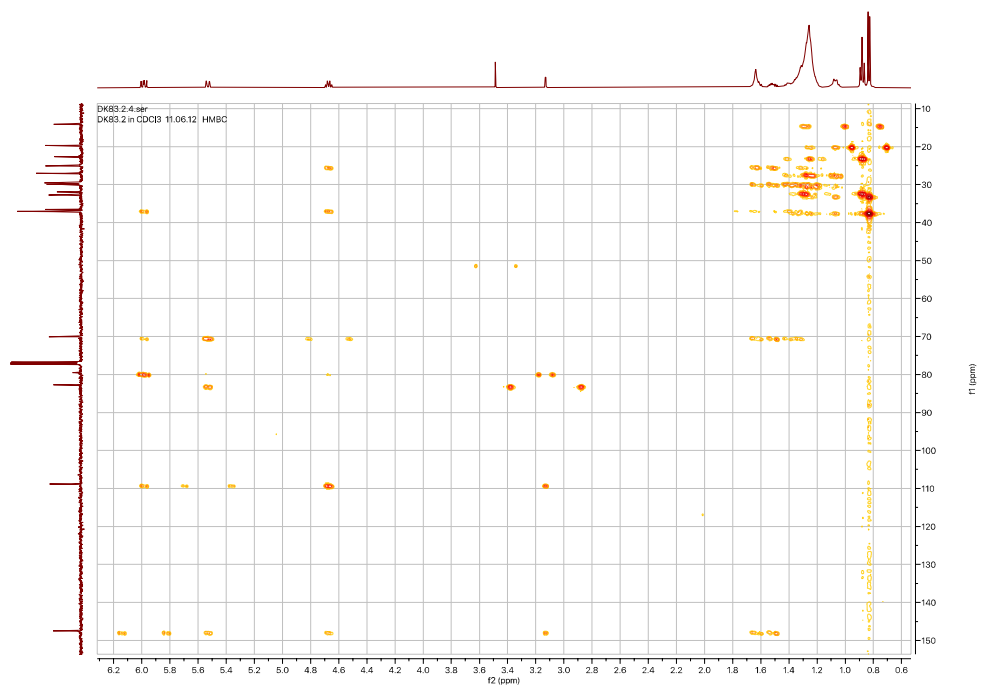

Figure S88. COSY spectrum of (5*S*)-14-methylicos-(3*Z*)-en-1-yn-5-ol (**14**) in CDCl<sub>3</sub>

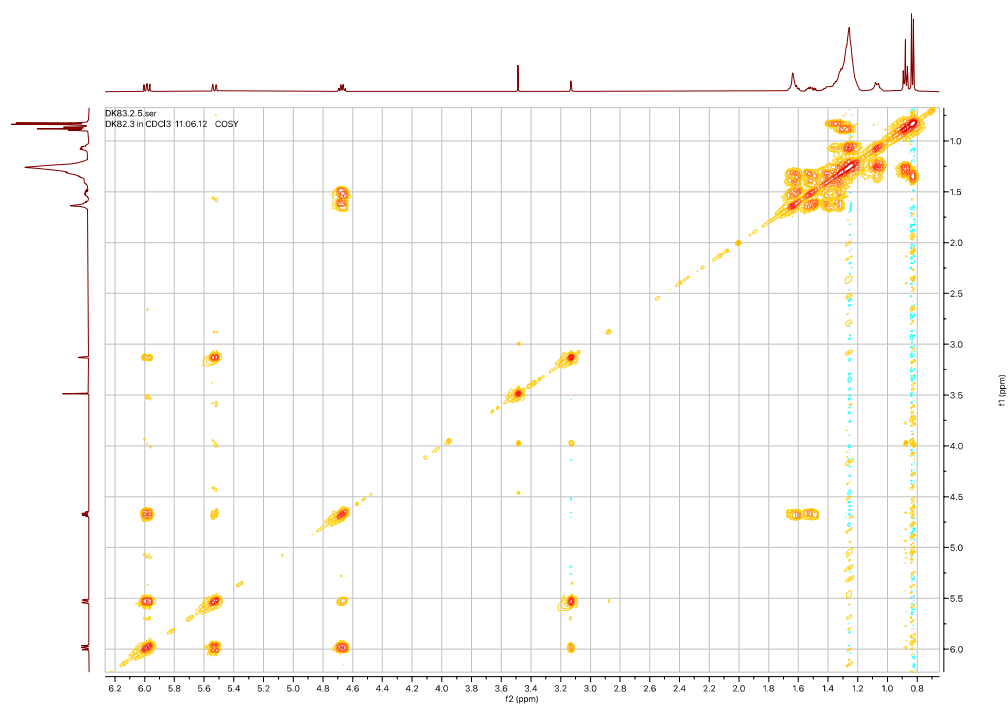

Figure S89. DEPT spectrum of (5*S*)-14-methylicos-(3*Z*)-en-1-yn-5-ol (**14**) in CDCl<sub>3</sub>

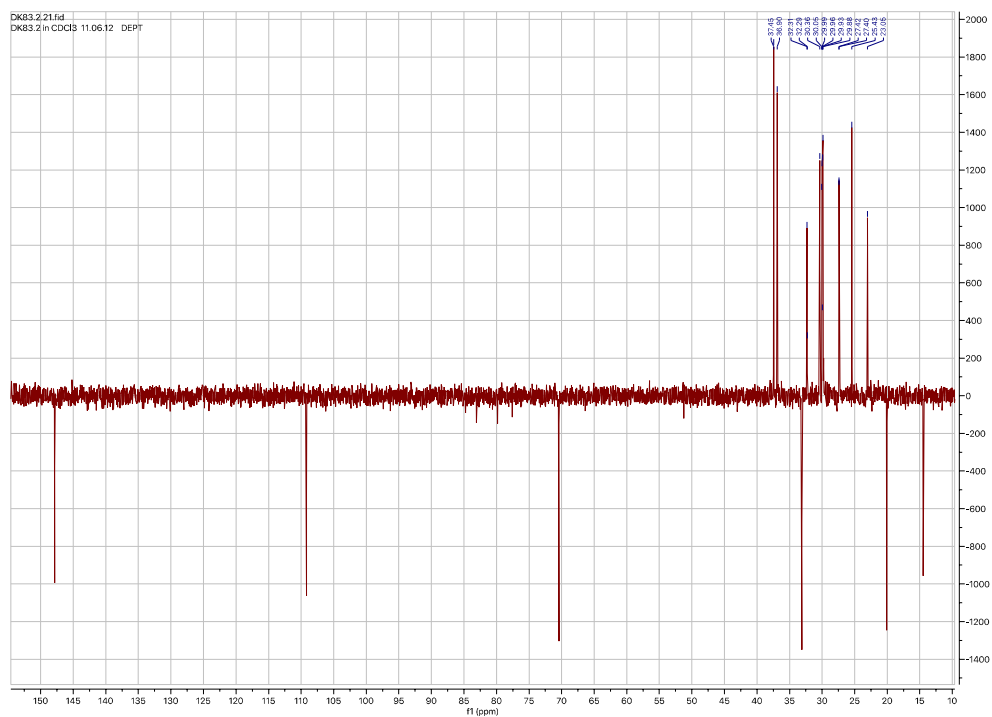

Table S14. NMR data of (5*S*)-14-methylicos-(3*Z*)-en-1-yn-5-ol (**14**) in CDCl<sub>3</sub>.<sup>a</sup>

| Position | $\delta_{\text{C}}$ , mult. <sup>b</sup> | $\delta_{\text{H}}$ , mult. $J$ (Hz) | LR H-C Correlations <sup>c</sup> |
|----------|------------------------------------------|--------------------------------------|----------------------------------|
| 1        | 82.7 <sup>d</sup> CH                     | 3.13 dd (3.5, 1.0)                   | 3                                |
| 2        | 79.5 <sup>e</sup> qC                     | -                                    | 1, 4                             |
| 3        | 108.8 CH                                 | 5.53 dd (11.0, 3.5, 1.0)             | 1, 4, 5                          |
| 4        | 147.5 CH                                 | 5.98 ddd (11.0, 8.0, 1.0)            | 1, 3, 5, 6a, 6b                  |
| 5        | 70.0 CH                                  | 4.67 qd (8.0, 1.0)                   | 3, 4, 6a, 6b, 7a, 7b             |
| 6a       | 36.5 CH <sub>2</sub>                     | 1.62 m                               | 4, 5, 7a, 7b, 8                  |
| b        |                                          | 1.52 m                               |                                  |
| 7a       | 25.1 CH <sub>2</sub>                     | 1.41 m                               | 5, 6a, 6b, 8                     |
| b        |                                          | 1.32 m                               |                                  |
| 8-11     | ~29.6 <sup>f</sup> 4 × CH <sub>2</sub>   | 1.21 – 1.33 brm                      |                                  |
| 12       | 27.1 CH <sub>2</sub>                     | 1.26 m                               | 11, 13a, 13b                     |
| 13a      | 37.1 CH <sub>2</sub>                     | 1.26 m                               | 12, 14, 15a, 15b, 21             |
| b        |                                          | 1.07 m                               |                                  |
| 14       | 32.7 CH                                  | 1.35 m                               | 13a, 13b, 15a, 15a, 21           |
| 15a      | 37.1 CH <sub>2</sub>                     | 1.26 m                               | 13a, 13b, 14, 16, 21             |
| b        |                                          | 1.07 m                               |                                  |
| 16       | 27.1 CH <sub>2</sub>                     | 1.26 m                               | 15a, 15b, 17                     |
| 17       | ~29.6 <sup>f</sup> CH <sub>2</sub>       | 1.21 – 1.33 brm                      |                                  |
| 18       | 32.3 CH <sub>2</sub>                     | 1.26 m                               | 17, 19a, 19b, 20                 |
| 19a      | 22.7 CH <sub>2</sub>                     | 1.31 m                               | 18, 20                           |
| b        |                                          | 1.26 m                               |                                  |
| 20       | 14.1 CH <sub>3</sub>                     | 0.88 t (7.0)                         | 18, 19a, 19b                     |
| 21       | 19.7 CH <sub>3</sub>                     | 0.83 d (6.5)                         | 13b, 15b                         |

<sup>a</sup>500.13 MHz for <sup>1</sup>H and 125.76 MHz for <sup>13</sup>C; <sup>b</sup>Multiplicity and assignment from HSQC experiment;<sup>c</sup>Determined from HMBC experiment; <sup>d</sup>  $^1J = 252.0$  Hz; <sup>e</sup>  $^2J = 49.1$  Hz; <sup>f</sup>Exact <sup>13</sup>C chemical shifts 29.52, 29.56, 29.63, 29.67, 29.99 ppm.

Figure S90. EIGCMS spectrum and fragmentation of (5*S*)-14-methylcos-(3*Z*)-en-1-yn-5-ol  
(14)

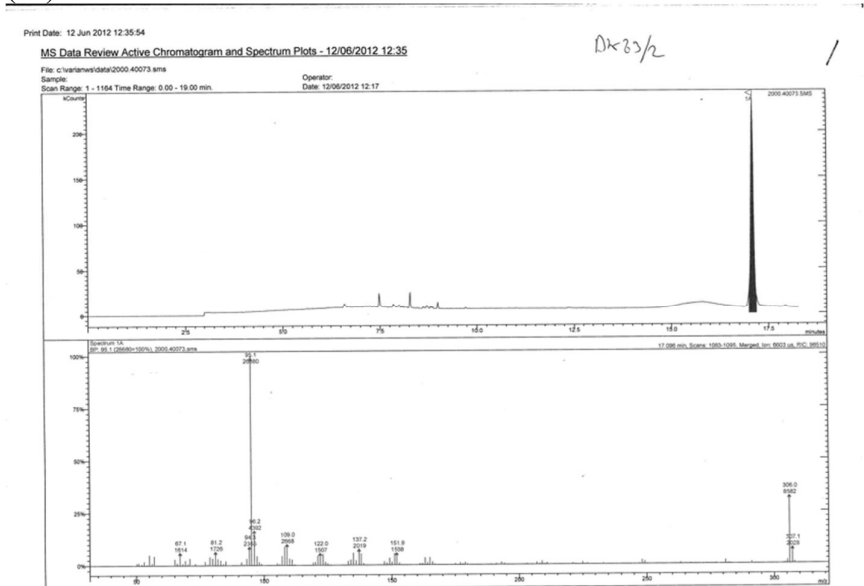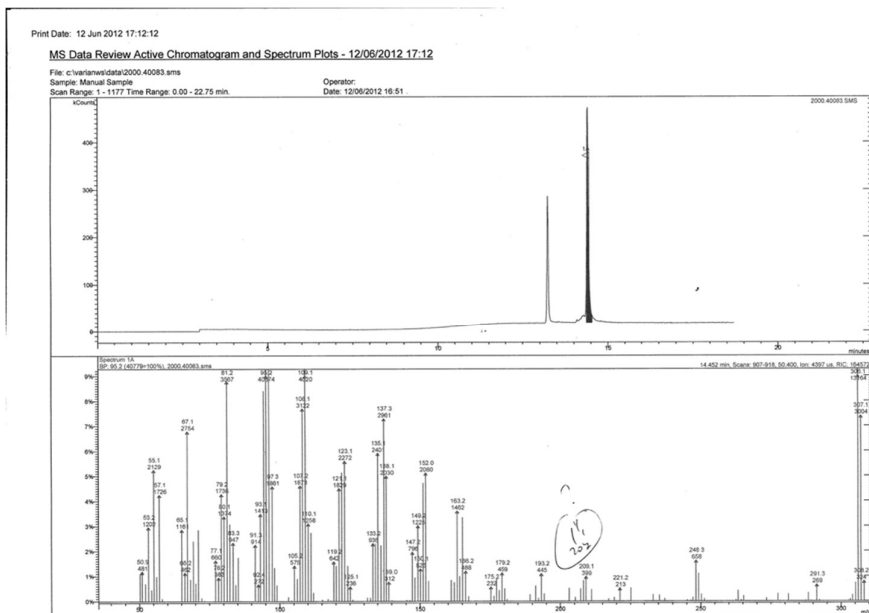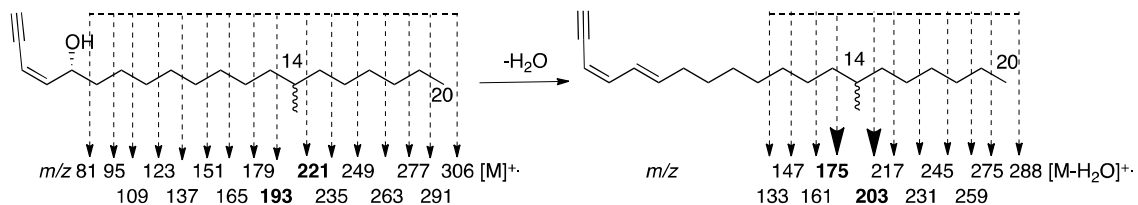



Figure S91. HRCIMS spectrum of (5*S*)-14-methylicos-(3*Z*)-en-1-yn-5-ol (14)

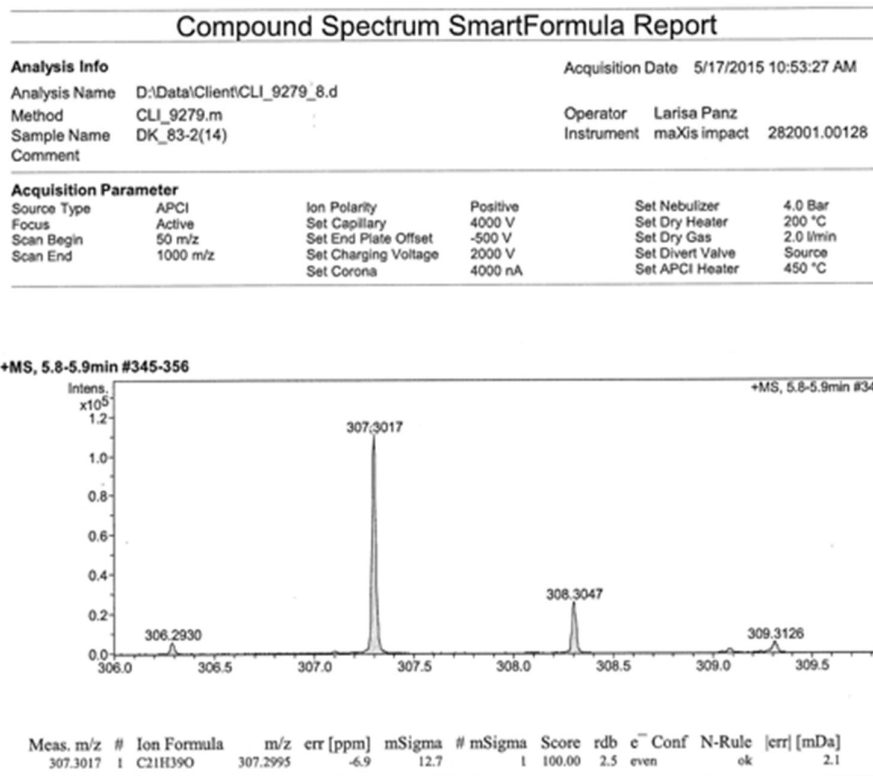

Figure S92.  $^1\text{H}$  NMR spectrum of (5*S*)-18-methylicos-(3*Z*)-en-1-yn-5-ol (**15**) and (5*S*)-19-methylicos-(3*Z*)-en-1-yn-5-ol (**16**) in  $\text{CDCl}_3$

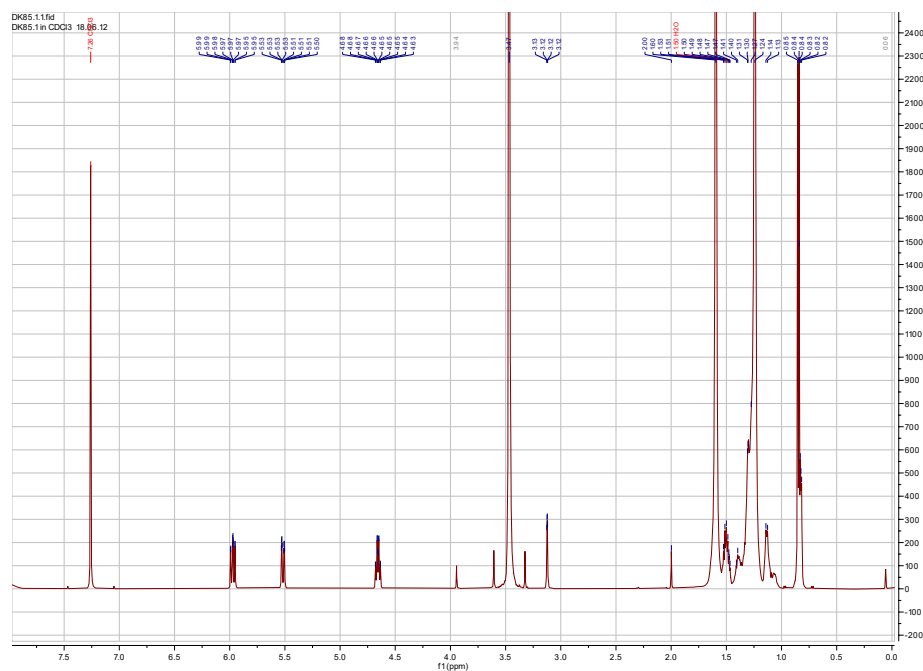

Figure S93.  $^{13}\text{C}$  NMR spectrum of (5*S*)-18-methylicos-(3*Z*)-en-1-yn-5-ol (**15**) and (5*S*)-19-methylicos-(3*Z*)-en-1-yn-5-ol (**16**) in  $\text{CDCl}_3$

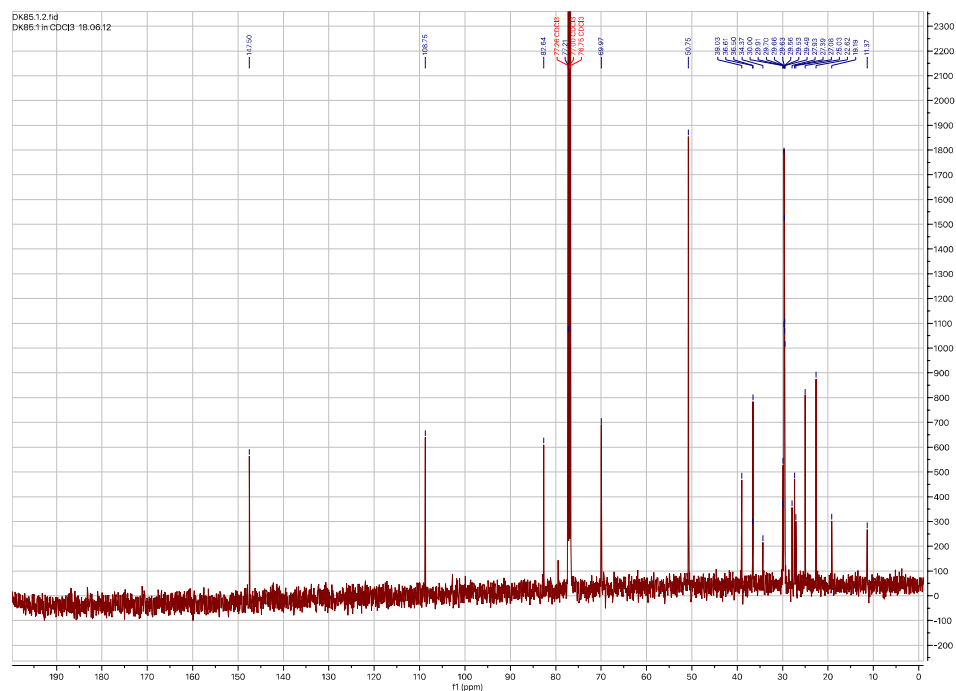

Figure S94. HSQC spectrum of (5*S*)-18-methylicos-(3*Z*)-en-1-yn-5-ol (**15**) and (5*S*)-19-methylicos-(3*Z*)-en-1-yn-5-ol (**16**) in CDCl<sub>3</sub>

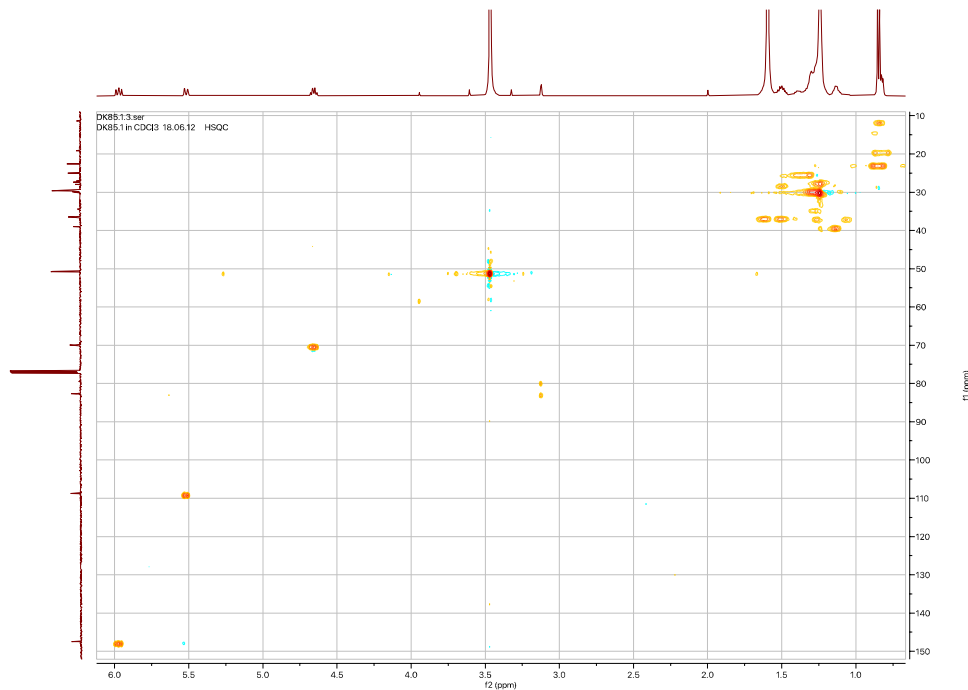

Figure S95. HMBC spectrum of (5*S*)-18-methylicos-(3*Z*)-en-1-yn-5-ol (**15**) and (5*S*)-19-methylicos-(3*Z*)-en-1-yn-5-ol (**16**) in CDCl<sub>3</sub>

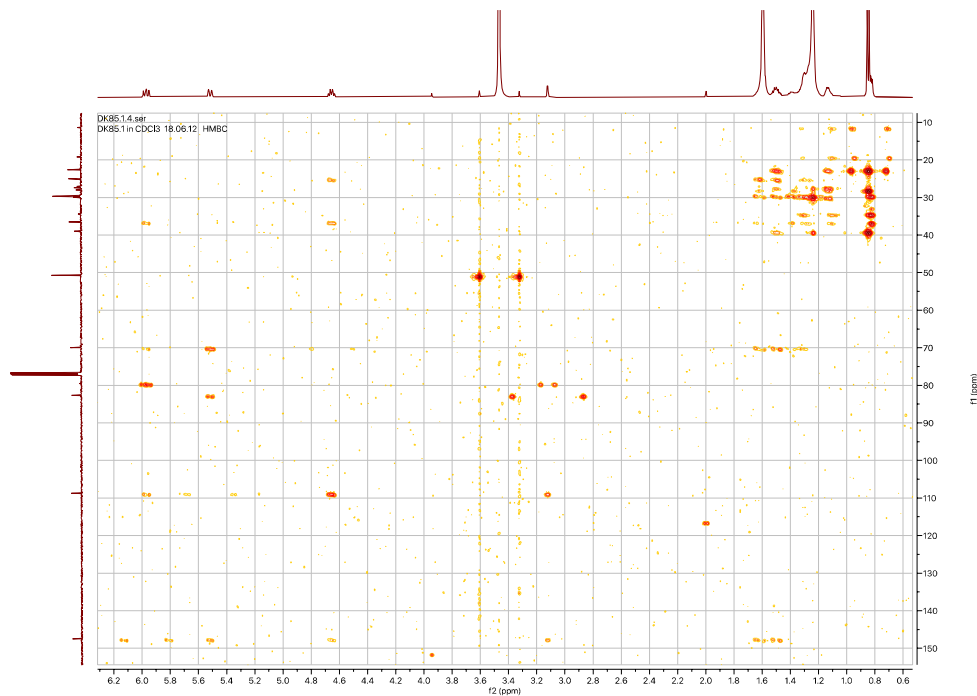

Figure S96. COSY spectrum of (5*S*)-18-methylicos-(3*Z*)-en-1-yn-5-ol (**15**) and (5*S*)-19-methylicos-(3*Z*)-en-1-yn-5-ol (**16**) in CDCl<sub>3</sub>

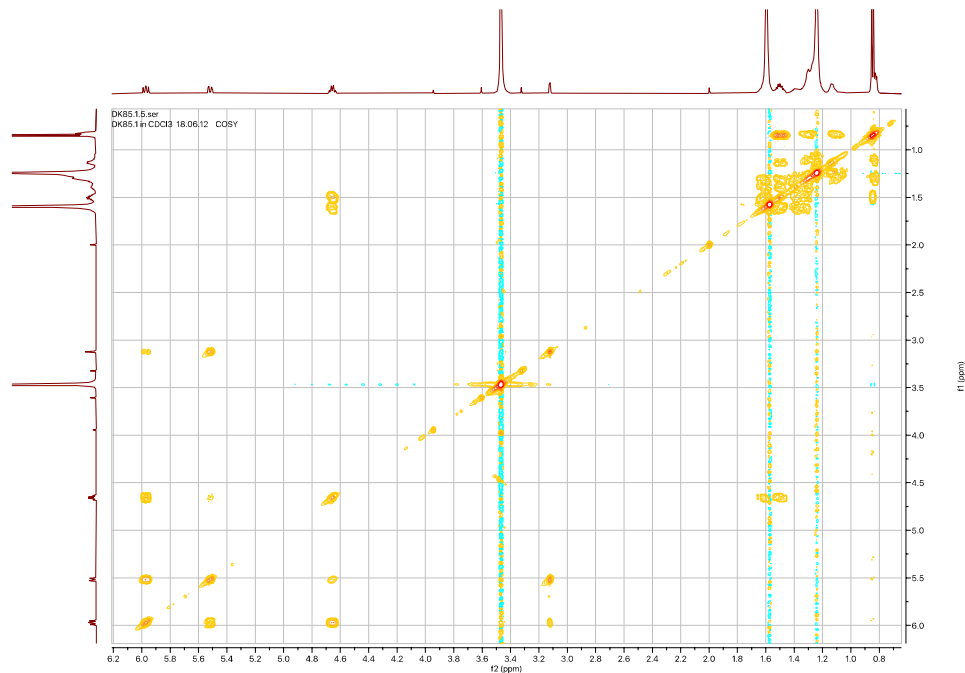

Figure S97. DEPT spectrum of (5*S*)-18-methylicos-(3*Z*)-en-1-yn-5-ol (**15**) and (5*S*)-19-methylicos-(3*Z*)-en-1-yn-5-ol (**16**) in CDCl<sub>3</sub>

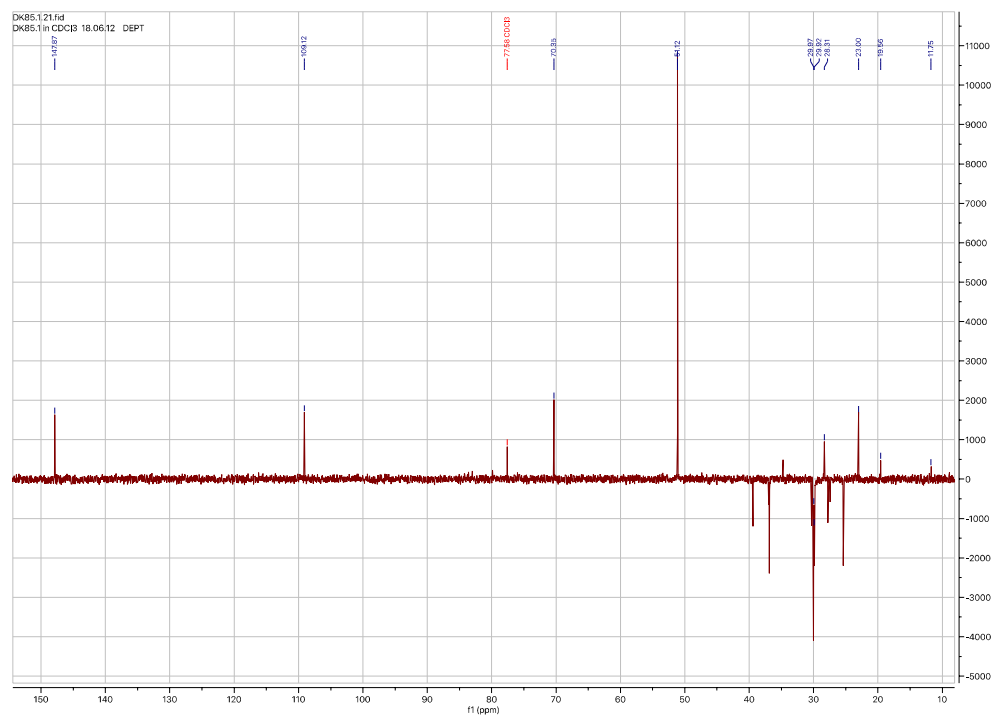

Table S15. NMR data of (5*S*)-18-methylicos-(3*Z*)-en-1-yn-5-ol (**15**) in CDCl<sub>3</sub>.<sup>a</sup>

| Position | $\delta_{\text{C}}$ , mult. <sup>b</sup> | $\delta_{\text{H}}$ , mult. $J$ (Hz) | LR H-C Correlations <sup>c</sup> |
|----------|------------------------------------------|--------------------------------------|----------------------------------|
| 1        | 82.6 <sup>d</sup> CH                     | 3.13 d (2.0)                         | 3                                |
| 2        | 79.6 <sup>e</sup> qC                     | -                                    | 1, 4                             |
| 3        | 108.7 CH                                 | 5.52 dd (11.0, 2.0)                  | 1, 4, 5                          |
| 4        | 147.5 CH                                 | 5.97 dd (11.0, 8.0)                  | 1, 3, 5, 6a, 6b                  |
| 5        | 70.0 CH                                  | 4.65 q (8.0)                         | 3, 4, 6a, 6b, 7a, 7b             |
| 6a       | 36.5 CH <sub>2</sub>                     | 1.62 m                               | 4, 5, 7a, 7b, 8                  |
| b        |                                          | 1.52 m                               |                                  |
| 7a       | 25.0 CH <sub>2</sub>                     | 1.39 m                               | 5, 6a, 6b, 8                     |
| b        |                                          | 1.32 m                               |                                  |
| 8-15     | ~29.6 <sup>f</sup> 8 × CH <sub>2</sub>   | 1.22 – 1.30 brm                      |                                  |
| 16       | 27.1 CH <sub>2</sub>                     | 1.24 m                               | 15, 17a, 17b                     |
| 17a      | 36.6 CH <sub>2</sub>                     | 1.06 m                               | 16, 18, 21                       |
| b        |                                          | 1.26 m                               |                                  |
| 18       | 34.4 CH                                  | 1.28 m                               | 17a, 17b, 19a, 19b, 20, 21       |
| 19a      | 22.6 CH <sub>2</sub>                     | 1.31 m                               | 20, 21                           |
| b        |                                          | 1.10 m                               |                                  |
| 20       | 11.4 CH <sub>3</sub>                     | 0.84 m                               | 19a, 19b                         |
| 21       | 19.2 CH <sub>3</sub>                     | 0.83 d (6.2)                         | 17a, 17b, 18, 19a, 19b           |

<sup>a</sup>500.13 MHz for <sup>1</sup>H and 125.76 MHz for <sup>13</sup>C; <sup>b</sup>Multiplicity and assignment from HSQC experiment; <sup>c</sup>Determined from HMBC experiment; <sup>d</sup> <sup>1</sup>*J* = 251.5 Hz; <sup>e</sup> <sup>2</sup>*J* = 50.6 Hz; <sup>f</sup>Exact <sup>13</sup>C chemical shifts 29.53, 29.56, 29.66 (× 3), 29.70, 29.91, 30.00 ppm.

Table S16. NMR data of (5*S*)-19-methylicos-(3*Z*)-en-1-yn-5-ol (**16**) in CDCl<sub>3</sub>.<sup>a</sup>

| Position | $\delta_{\text{C}}$ , mult. <sup>b</sup> | $\delta_{\text{H}}$ , mult. $J$ (Hz) | LR H-C Correlations <sup>c</sup> |
|----------|------------------------------------------|--------------------------------------|----------------------------------|
| 1        | 82.6 <sup>d</sup> CH                     | 3.13 d (2.0)                         | 3                                |
| 2        | 79.6 <sup>e</sup> qC                     | -                                    | 1, 4                             |
| 3        | 108.7 CH                                 | 5.52 dd (10.5, 2.0)                  | 1, 4, 5                          |
| 4        | 147.5 CH                                 | 5.97 dd (10.5, 8.0)                  | 1, 3, 5, 6a, 6b                  |
| 5        | 70.0 CH                                  | 4.65 q (8.0)                         | 3, 4, 6a, 6b, 7a, 7b             |
| 6a       | 36.5 CH <sub>2</sub>                     | 1.62 m                               | 4, 5, 7a, 7b, 8                  |
| b        |                                          | 1.52 m                               |                                  |
| 7a       | 25.0 CH <sub>2</sub>                     | 1.39 m                               | 5, 6a, 6b, 8                     |
| b        |                                          | 1.32 m                               |                                  |
| 8-16     | ~29.6 <sup>f</sup> 9 × CH <sub>2</sub>   | 1.22 – 1.30 brm                      |                                  |
| 17       | 27.4 CH <sub>2</sub>                     | 1.24 m                               | 16, 18                           |
| 18       | 39.0 CH <sub>2</sub>                     | 1.13 m                               | 17, 19, 20, 21                   |
| 19       | 27.9 CH                                  | 1.50 m                               | 18, 20, 21                       |
| 20       | 22.6 CH <sub>3</sub>                     | 0.85 d (6.5)                         | 18, 19, 21                       |
| 21       | 22.6 CH <sub>3</sub>                     | 0.85 d (6.5)                         | 18, 19, 20                       |

<sup>a</sup>500.13 MHz for <sup>1</sup>H and 125.76 MHz for <sup>13</sup>C; <sup>b</sup>Multiplicity and assignment from HSQC experiment; <sup>c</sup>Determined from HMBC experiment; <sup>d</sup> <sup>1</sup>*J* = 251.5 Hz; <sup>e</sup> <sup>2</sup>*J* = 50.6 Hz; <sup>f</sup>Exact <sup>13</sup>C chemical shifts 29.49, 29.53, 29.56, 29.66 (× 6) ppm.

Figure S98. EIGCMS spectrum of (5*S*)-18-methylicos-(3*Z*)-en-1-yn-5-ol (15)

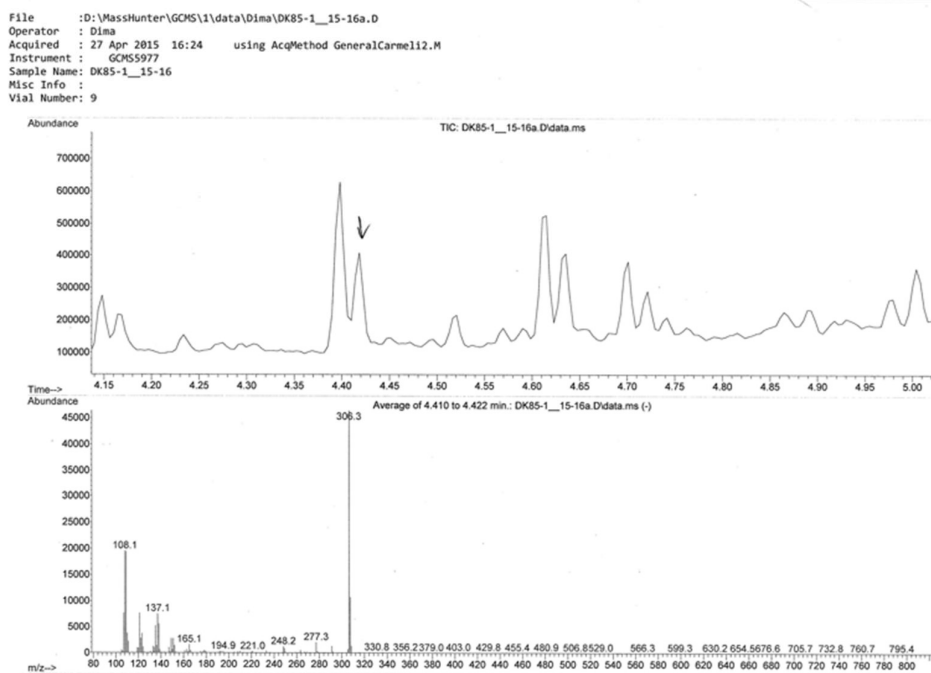

Figure S99. EIGCMS spectrum of (5*S*)-19-methylicos-(3*Z*)-en-1-yn-5-ol (16)

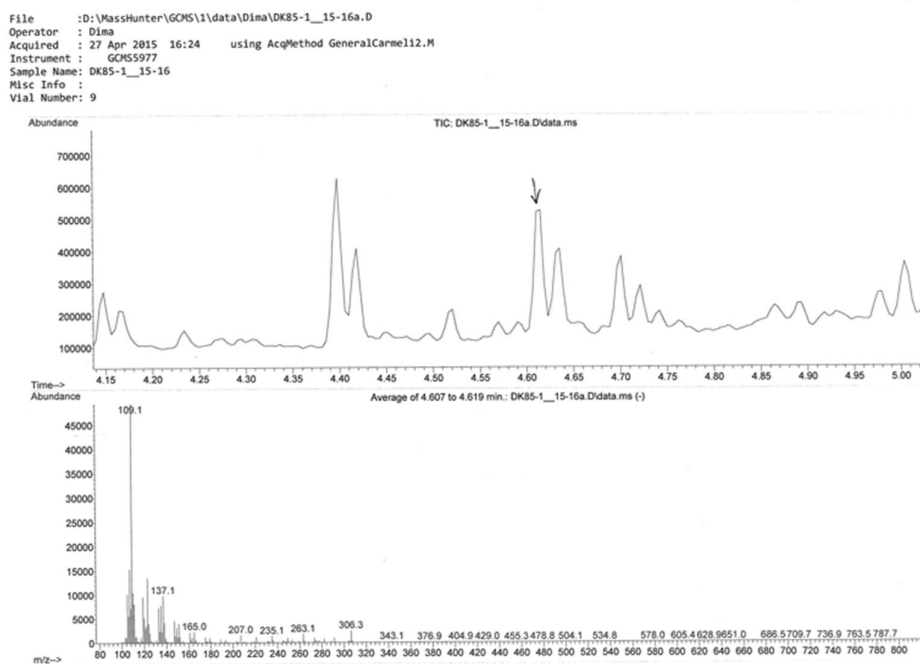

Figure S100. HRCIMS spectrum of (5S)-18-methylicos-(3Z)-en-1-yn-5-ol (15)

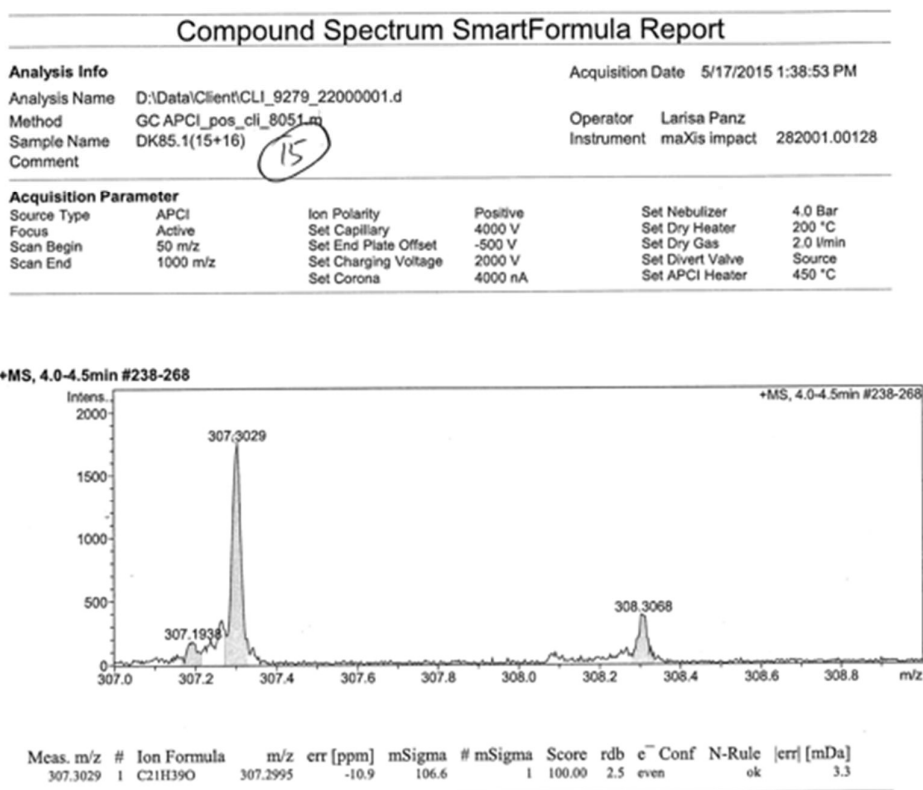

Figure S101. HRCIMS spectrum of (5S)-19-methylicos-(3Z)-en-1-yn-5-ol (16)

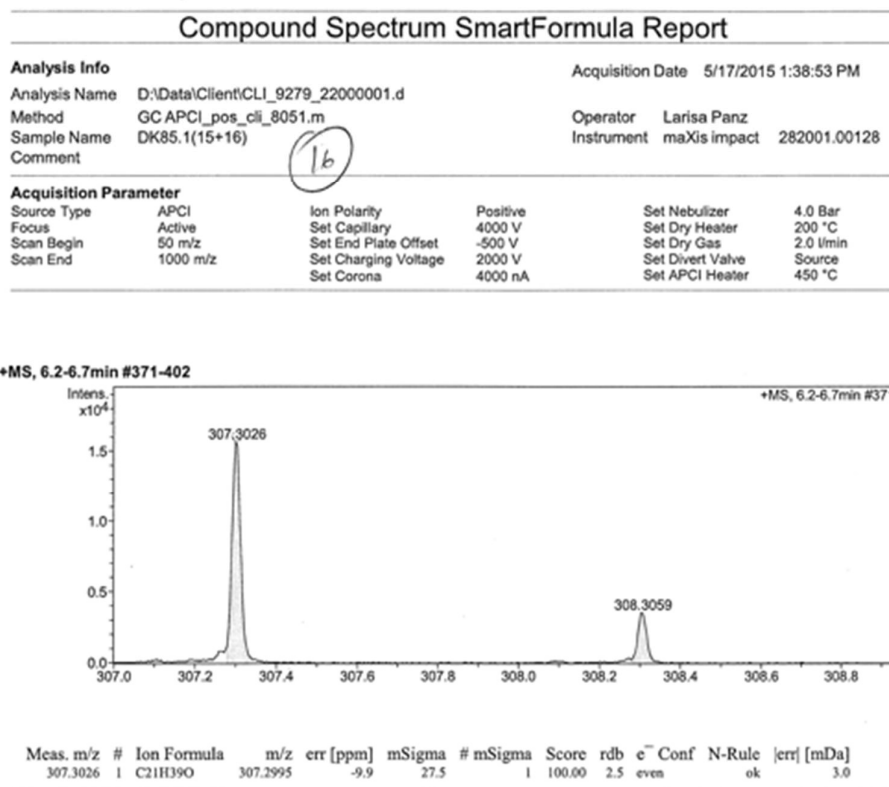



1H NMR spectrum of compound 10b in CDCl<sub>3</sub>. The x-axis represents the chemical shift in ppm, ranging from 0 to 6.2. The y-axis represents the intensity. The spectrum shows several peaks: a multiplet at 6.0-6.1 ppm, a doublet at 5.6-5.7 ppm, a doublet at 4.6-4.7 ppm, a doublet at 3.8-3.9 ppm, a singlet at 3.2 ppm, a small peak at 2.9 ppm, a broad multiplet between 1.2 and 1.8 ppm, and a complex multiplet between 0.8 and 1.1 ppm. Integration values are provided above the peaks.

13C NMR spectrum (CDCl<sub>3</sub>) of compound 10b. The x-axis represents the chemical shift in ppm, ranging from 145 to 15. The y-axis represents intensity. The spectrum shows several sharp peaks, with the most intense peak at approximately 77 ppm, which is the solvent triplet for CDCl<sub>3</sub>. Other significant peaks are observed at approximately 142 ppm, 111 ppm, 81 ppm, 77 ppm (triplet), 73 ppm, 37 ppm, 31 ppm, 26 ppm, 22 ppm, 19 ppm, and 14 ppm. The peak at 142 ppm is assigned to the carbonyl carbon, and the peak at 111 ppm is assigned to the aromatic carbon. The peak at 81 ppm is assigned to the quaternary carbon of the isopropyl group. The peak at 77 ppm is the solvent, and the peak at 73 ppm is the methine carbon of the isopropyl group. The peaks at 37, 31, 26, 22, 19, and 14 ppm are assigned to the various carbons of the side chain and the methyl groups.

Figure S104. HSQC spectrum of 14-methyldocos-(3*Z*)-en-1-yn-5,6-diol (**17**) in CDCl<sub>3</sub>

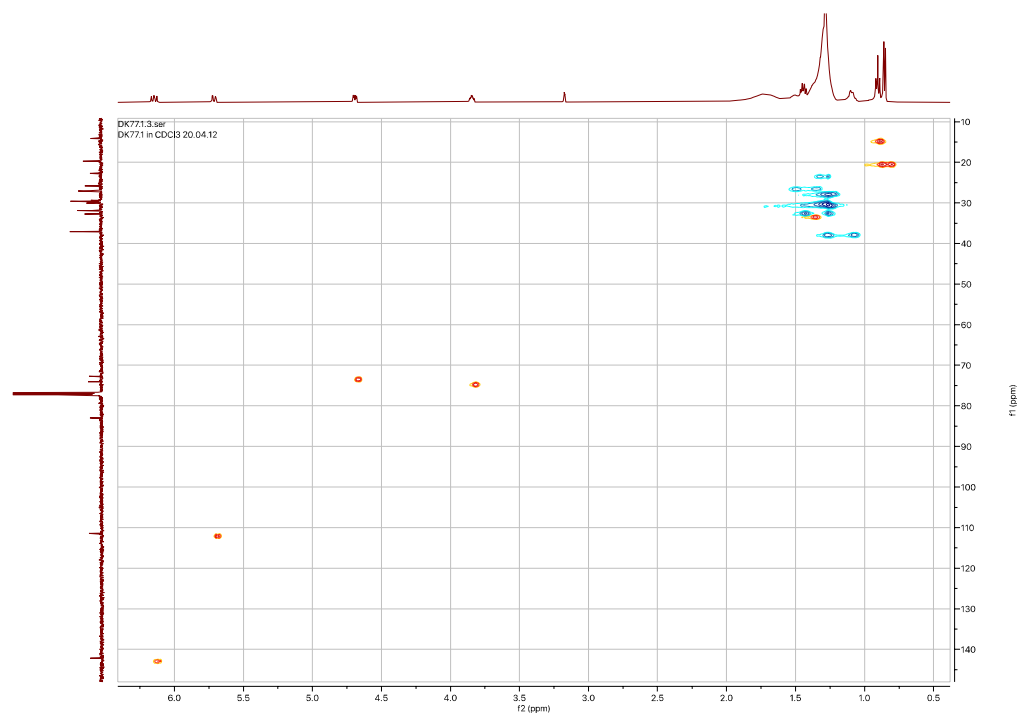

Figure S105. HMBC spectrum of 14-methyldocos-(3*Z*)-en-1-yn-5,6-diol (**17**) in CDCl<sub>3</sub>

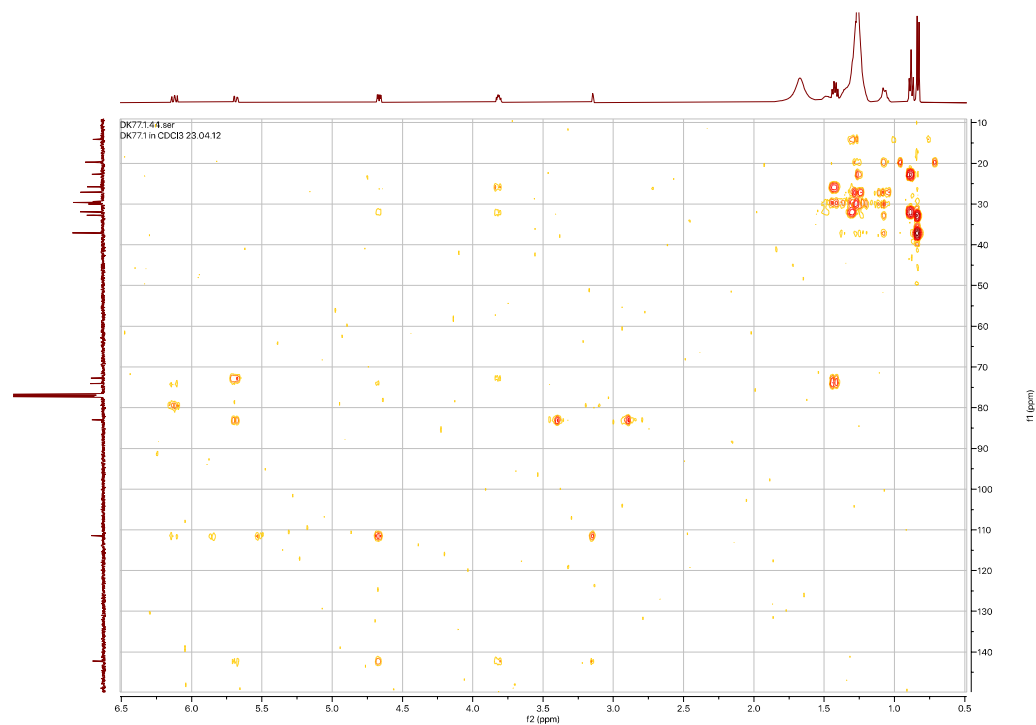

Figure S106. COSY spectrum of 14-methyldocos-(3Z)-en-1-yn-5,6-diol (**17**) in CDCl<sub>3</sub>

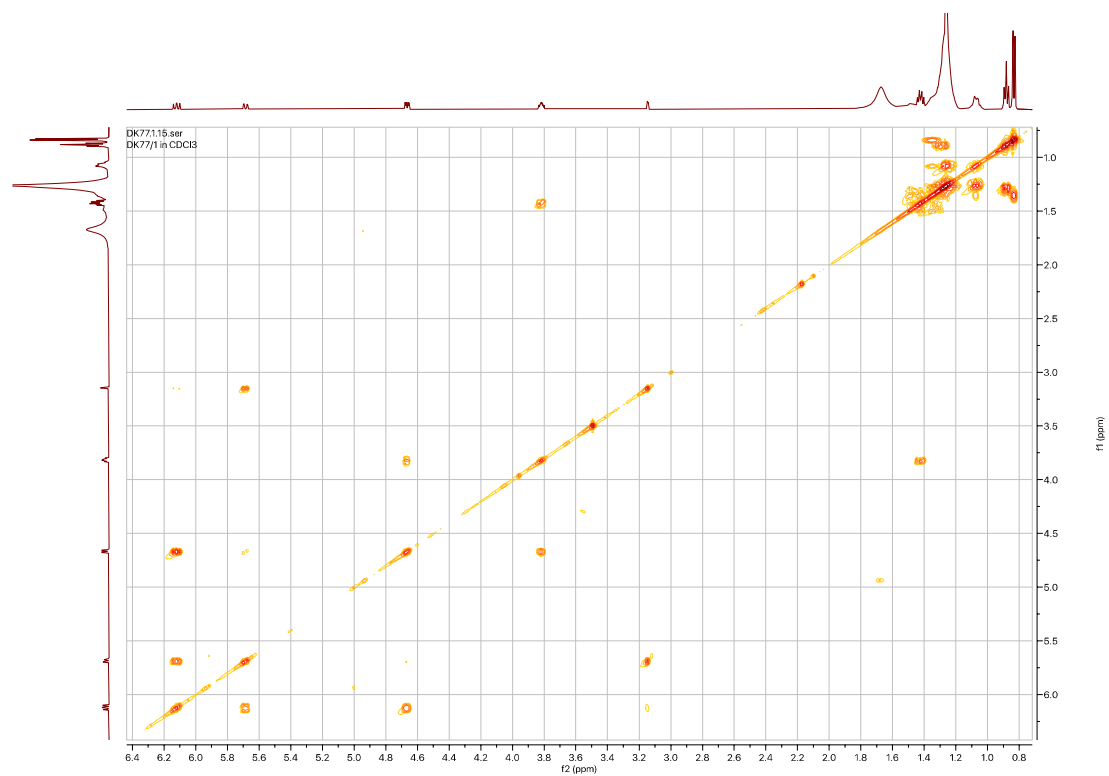

Table S17. NMR data of 14-methyldocos-(3*Z*)-en-1-yn-5,6-diol (**17**) in CDCl<sub>3</sub>.<sup>a</sup>

| Position | $\delta_{\text{C}}$ , mult. <sup>b</sup>    | $\delta_{\text{H}}$ , mult. $J$ (Hz) | LR H-C Correlations <sup>c</sup> |
|----------|---------------------------------------------|--------------------------------------|----------------------------------|
| 1        | 83.0 <sup>d</sup> CH                        | 3.16 d (1.5)                         | 3                                |
| 2        | 79.3 <sup>e</sup> qC                        | -                                    | 1, 4                             |
| 3        | 111.4 CH                                    | 5.68 dd (11.0, 1.5)                  | 1, 4, 5                          |
| 4        | 147.5 CH                                    | 6.12 dd (11.0, 9.0)                  | 1, 3, 5, 6                       |
| 5        | 72.7 CH                                     | 4.68 dd (9.0, 3.0)                   | 3, 6, 7                          |
| 6        | 74.1 CH                                     | 3.82 td (6.5, 3.0)                   | 4, 5, 7                          |
| 7        | 31.9 CH <sub>2</sub>                        | 1.43 q (6.5)                         | 5, 6, 8a, 8b                     |
| 8a       | 25.8 CH <sub>2</sub>                        | 1.49 m                               | 6, 7                             |
| b        |                                             | 1.34 m                               |                                  |
| 9        | 29.4 CH <sub>2</sub>                        | 1.28 m                               | 7                                |
| 10-11    | $\sim 29.6^{\text{f}} 2 \times \text{CH}_2$ | 1.24 – 1.28 brm                      |                                  |
| 12       | 27.1 CH <sub>2</sub>                        | 1.25 m                               | 11, 13a, 13b                     |
| 13a      | 37.1 CH <sub>2</sub>                        | 1.26 m                               | 14, 15a, 15b, 23                 |
| b        |                                             | 1.06 m                               |                                  |
| 14       | 32.7 CH                                     | 1.35 m                               | 13a, 13b, 15a, 15b, 23           |
| 15a      | 37.1 CH <sub>2</sub>                        | 1.26 m                               | 13a, 13b, 14, 23                 |
| b        |                                             | 1.06 m                               |                                  |
| 16       | 27.1 CH <sub>2</sub>                        | 1.25 m                               | 15a, 15b, 17                     |
| 17-19    | $\sim 29.6^{\text{f}} 3 \times \text{CH}_2$ | 1.24 – 1.28 brm                      |                                  |
| 20       | 31.9 CH                                     | 1.25 m                               | 19, 21a, 21b, 22                 |
| 21a      | 22.7 CH <sub>2</sub>                        | 1.32 m                               | 20, 22                           |
| b        |                                             | 1.26 m                               |                                  |
| 22       | 14.1 CH <sub>3</sub>                        | 0.84 t (6.5)                         | 21a, 21b                         |
| 23       | 19.7 CH <sub>3</sub>                        | 0.83 d (6.5)                         | 13a, 13b, 14, 15a, 15b           |

<sup>a</sup>500.13 MHz for <sup>1</sup>H and 125.76 MHz for <sup>13</sup>C; <sup>b</sup>Multiplicity and assignment from HSQC experiment; <sup>c</sup>Determined from HMBC experiment; <sup>d</sup><sup>1</sup>*J* = 250.5 Hz; <sup>e</sup><sup>2</sup>*J* = 45.0 Hz; <sup>f</sup>Exact <sup>13</sup>C chemical shifts 29.61, 29.69, 29.93, 29.98, 30.03 ppm.

Figure S107. EIMS and fragmentation pattern of 14-methyldocos-(3Z)-en-1-yn-5,6-diol (17)

File : C:\msdchem\1\DATA\SMB DATA 7\_11\AVIV1018.D  
 Operator :  
 Acquired : 29 Apr 2012 13:34 using AcqMethod SMB GC-MS.M  
 Instrument : GC-MSD  
 Sample Name: Dima ~C20 77.1  
 Misc Info : Dima ~C20 77.1  
 Vial Number: 1

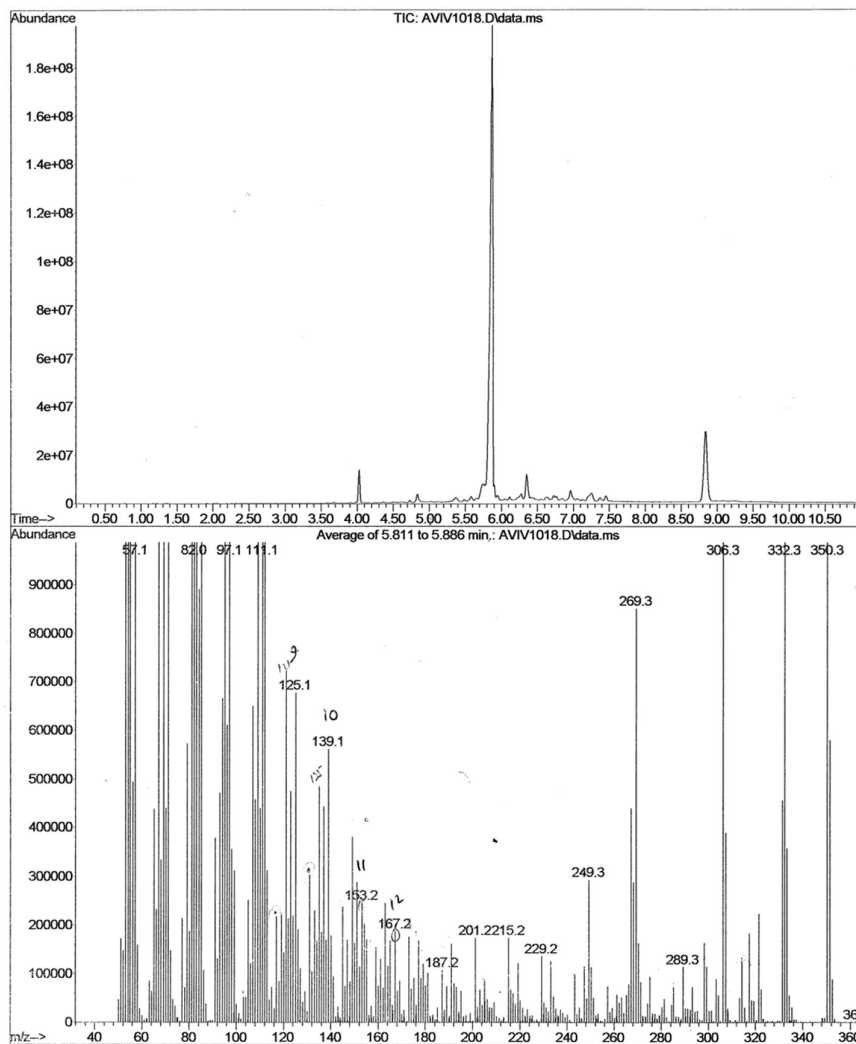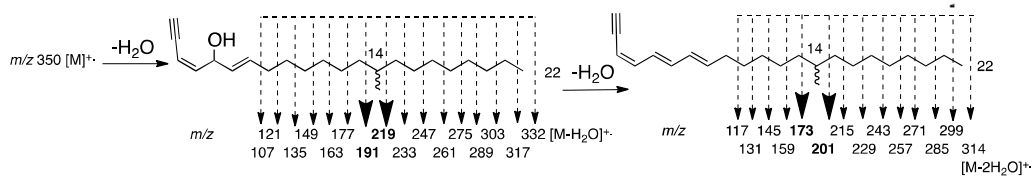

Figure S108.  $^1\text{H}$  NMR spectrum of (3*R*)-icos-(4*E*)-en-1-yn-3-ol (**18**) in  $\text{CDCl}_3$

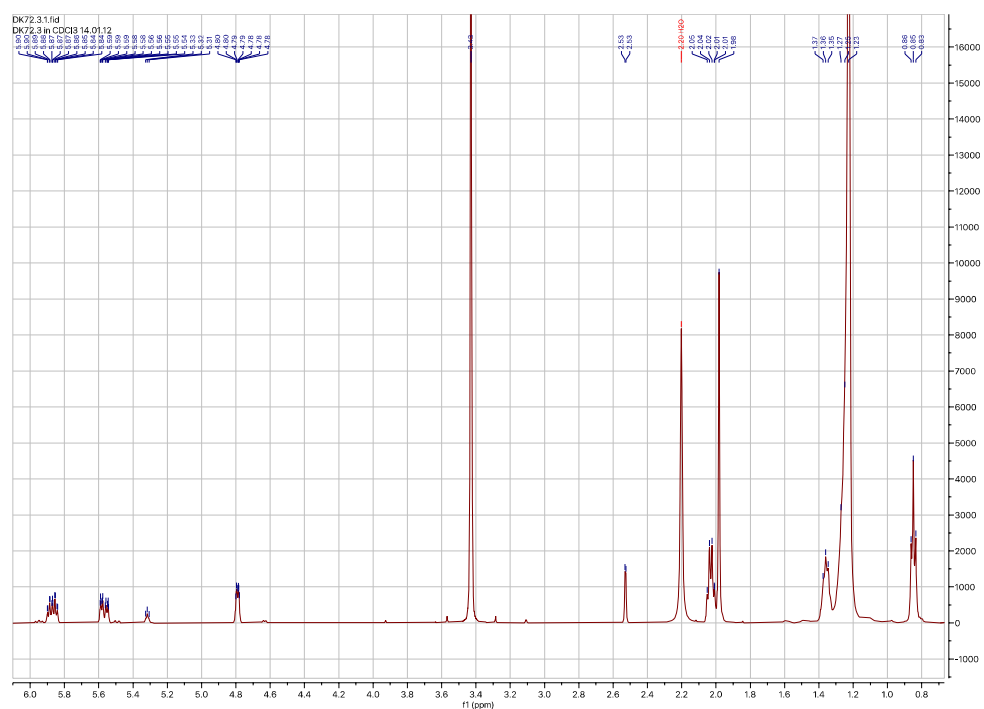

Figure S109.  $^{13}\text{C}$  NMR spectrum of (3*R*)-icos-(4*E*)-en-1-yn-3-ol (**18**) in  $\text{CDCl}_3$

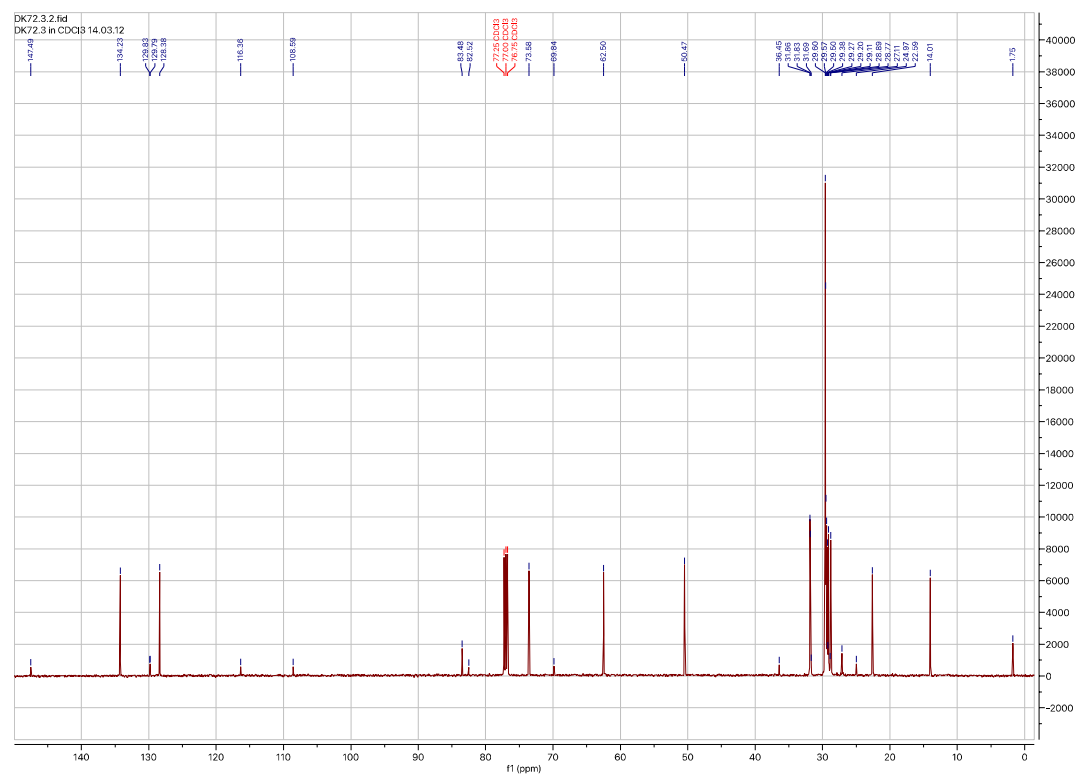

Figure S110. HSQC spectrum of (3*R*)-icos-(4*E*)-en-1-yn-3-ol (**18**) in CDCl<sub>3</sub>.

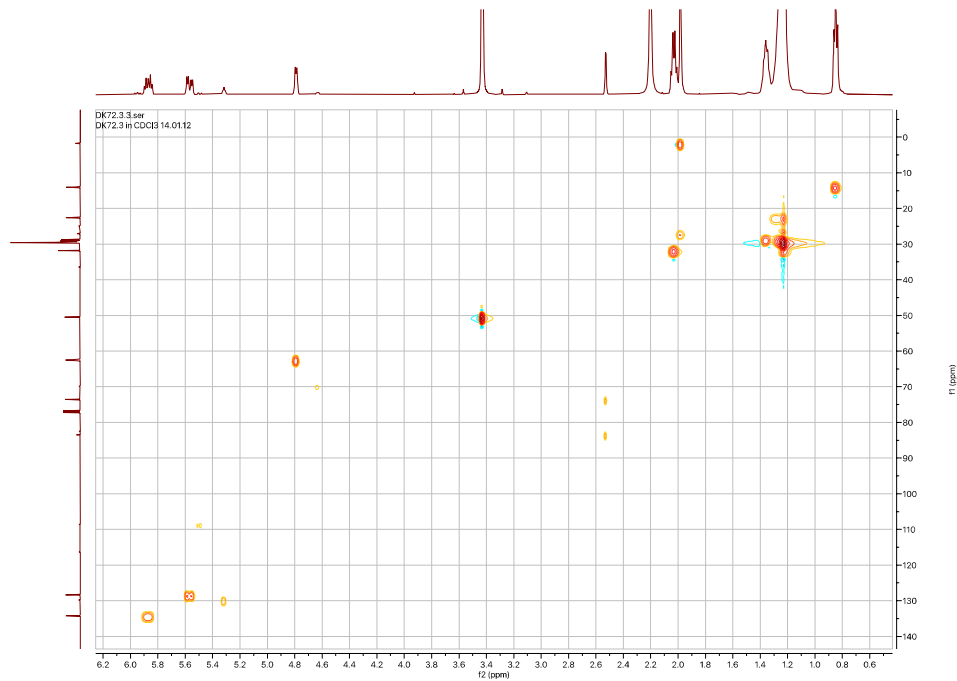

Figure S111. HMBC spectrum of (3*R*)-icos-(4*E*)-en-1-yn-3-ol (**18**) in CDCl<sub>3</sub>.

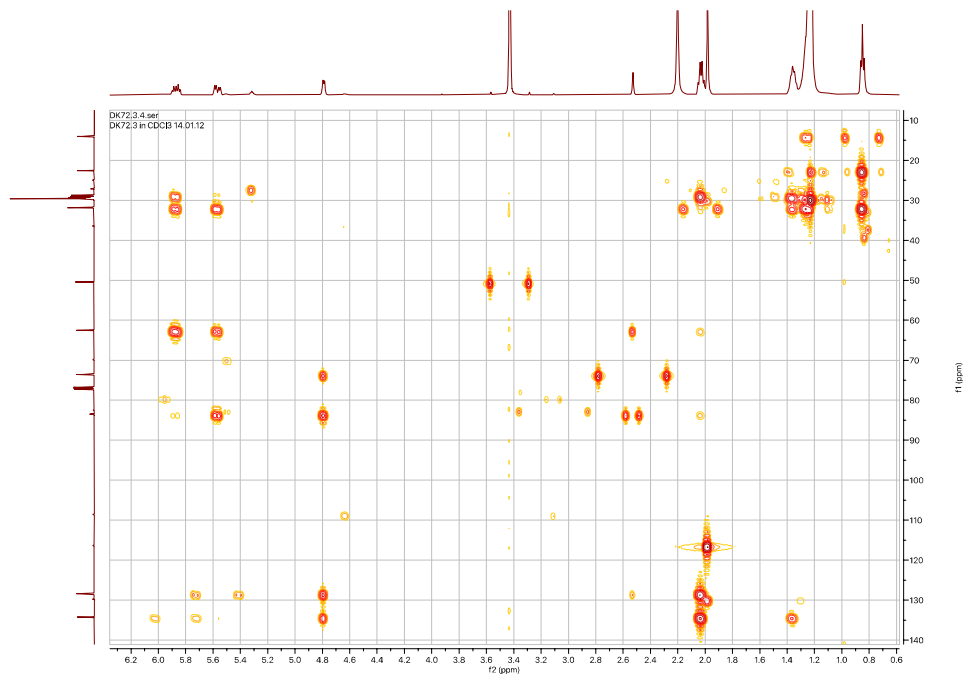

Figure S112. COSY spectrum of (3*R*)-icos-(4*E*)-en-1-yn-3-ol (**18**) in CDCl<sub>3</sub>.

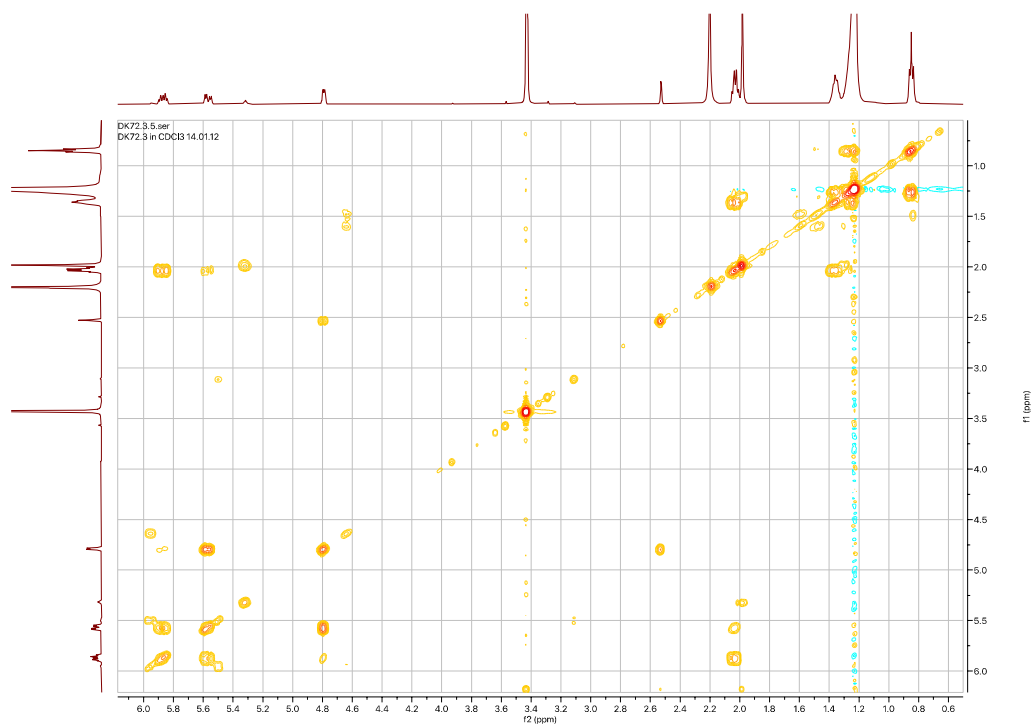

Figure S113. DEPT spectrum of (3*R*)-icos-(4*E*)-en-1-yn-3-ol (**18**) in CDCl<sub>3</sub>.

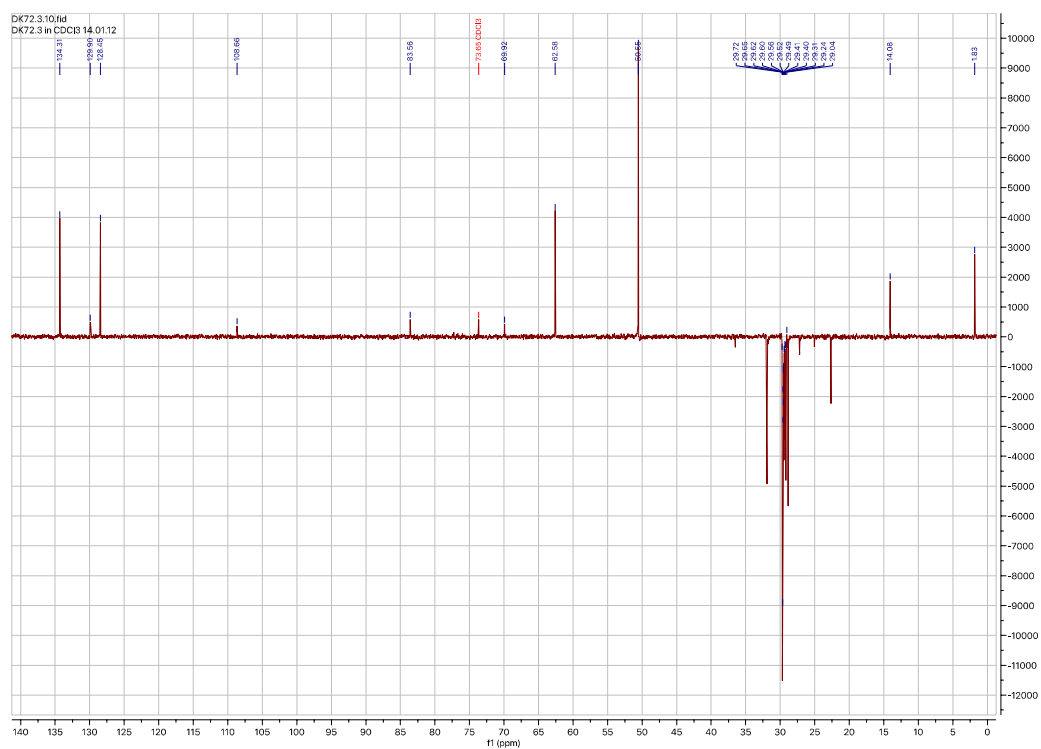



Table S18. NMR data of (3*R*)-icos-(4*E*)-en-1-yn-3-ol (**18**) in CDCl<sub>3</sub>.<sup>a</sup>

| Position | $\delta_{\text{C}}$ , mult. <sup>b</sup>       | $\delta_{\text{H}}$ , mult. $J$ (Hz) | LR H-C Correlations <sup>c</sup> |
|----------|------------------------------------------------|--------------------------------------|----------------------------------|
| 1        | 73.6 <sup>d</sup> CH                           | 2.53 d (2.0)                         | 3                                |
| 2        | 83.5 <sup>e</sup> qC                           | -                                    | 1, 3, 4                          |
| 3        | 62.5 CH                                        | 4.79 d (6.0)                         | 1, 4, 5                          |
| 4        | 128.4 CH                                       | 5.56 dd (15.5, 6.0)                  | 3, 6                             |
| 5        | 134.5 CH                                       | 5.87 dt (15.5, 7.0)                  | 3, 6, 7                          |
| 6        | 31.9 CH <sub>2</sub>                           | 2.03 q (7.0)                         | 5, 7, 8                          |
| 7        | 28.8 CH <sub>2</sub>                           | 1.36 m                               | 5, 6, 8                          |
| 8-17     | ~29.6 <sup>f</sup> 10 $\times$ CH <sub>2</sub> | 1.21 – 1.28 brm                      |                                  |
| 18       | 31.8 CH                                        | 1.23 m                               | 17, 19a, 19b, 20                 |
| 19a      | 22.6 CH <sub>2</sub>                           | 1.36 m                               | 18, 20                           |
| b        |                                                | 1.26 m                               |                                  |
| 20       | 14.0 CH <sub>3</sub>                           | 0.85 t (7.0)                         | 18, 19b                          |

<sup>a</sup>500.13 MHz for <sup>1</sup>H and 125.76 MHz for <sup>13</sup>C; <sup>b</sup>Multiplicity and assignment from HSQC experiment; <sup>c</sup>Determined from HMBC experiment; <sup>d</sup> <sup>1</sup> $J$  = 250.0 Hz; <sup>e</sup> <sup>2</sup> $J$  = 48.4 Hz; <sup>f</sup>Exact <sup>13</sup>C chemical shifts 29.10, 29.26, 29.38, 29.59 ( $\times$  6), 29.50 ppm.

Figure S114. EIGCMS spectrum of (3*R*)-icos-(4*E*)-en-1-yn-3-ol (**18**)

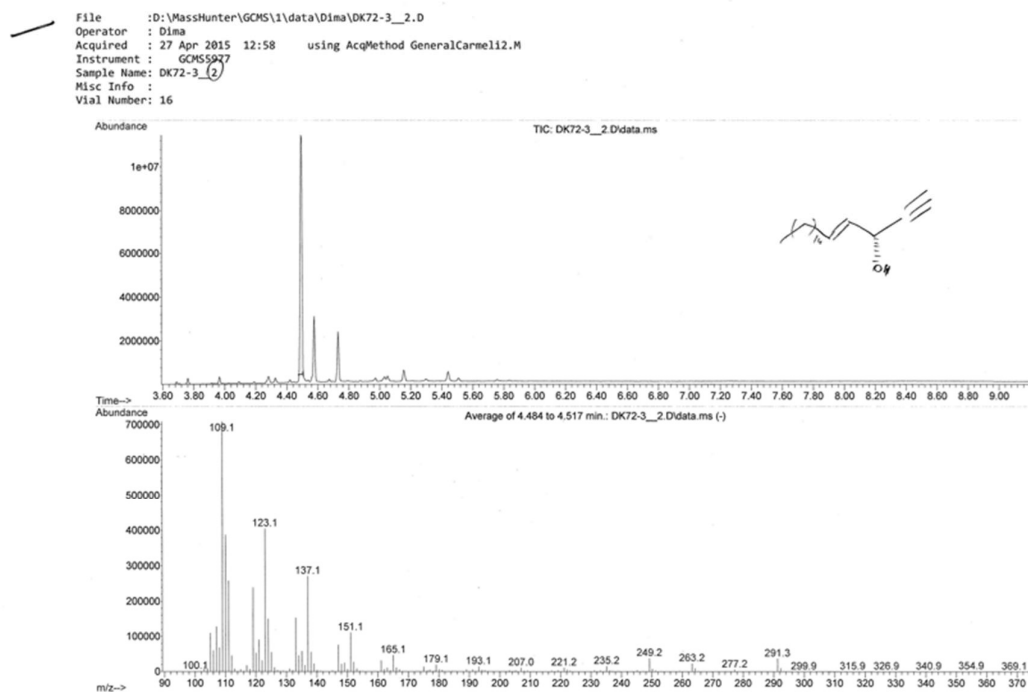

Figure S115. HRCIMS spectrum of (3*R*)-icos-(4*E*)-en-1-yn-3-ol (**18**)

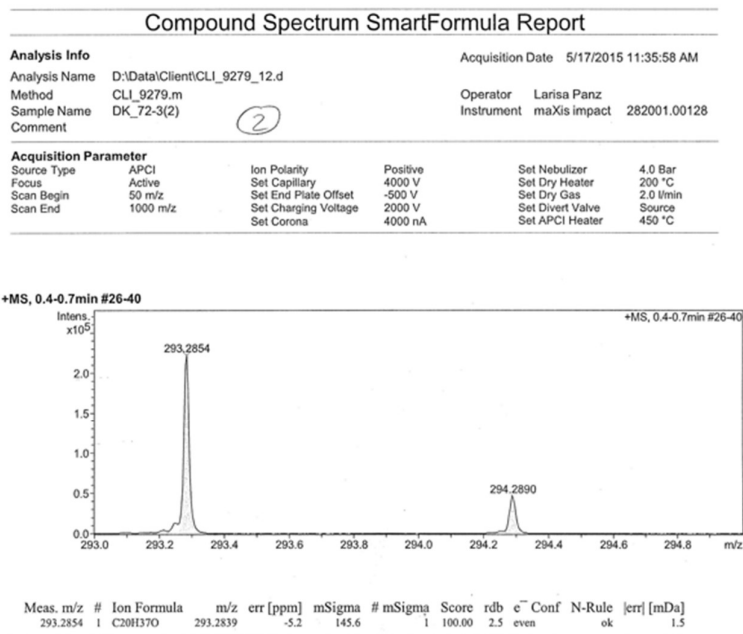

Figure S116. <sup>1</sup>H NMR spectrum of (3*R*)-19-methylicos-(4*E*)-en-1-yn-3-ol (**19**) in CDCl<sub>3</sub>

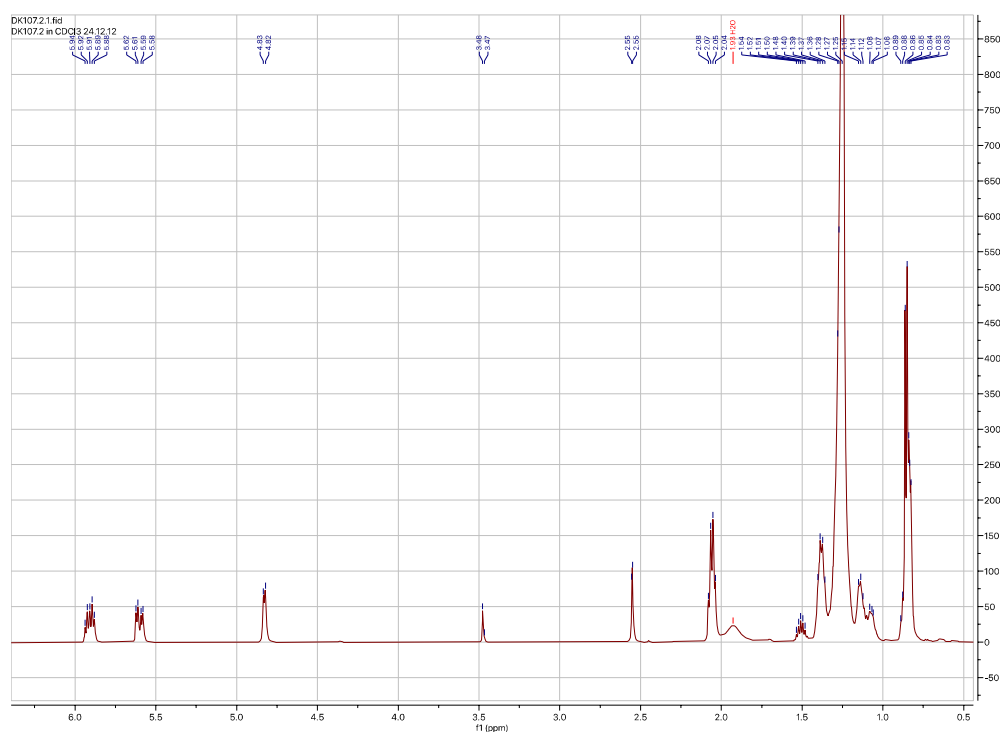

Figure S117.  $^{13}\text{C}$  NMR spectrum of (3*R*)-19-methylicos-(4*E*)-en-1-yn-3-ol (**19**) in  $\text{CDCl}_3$

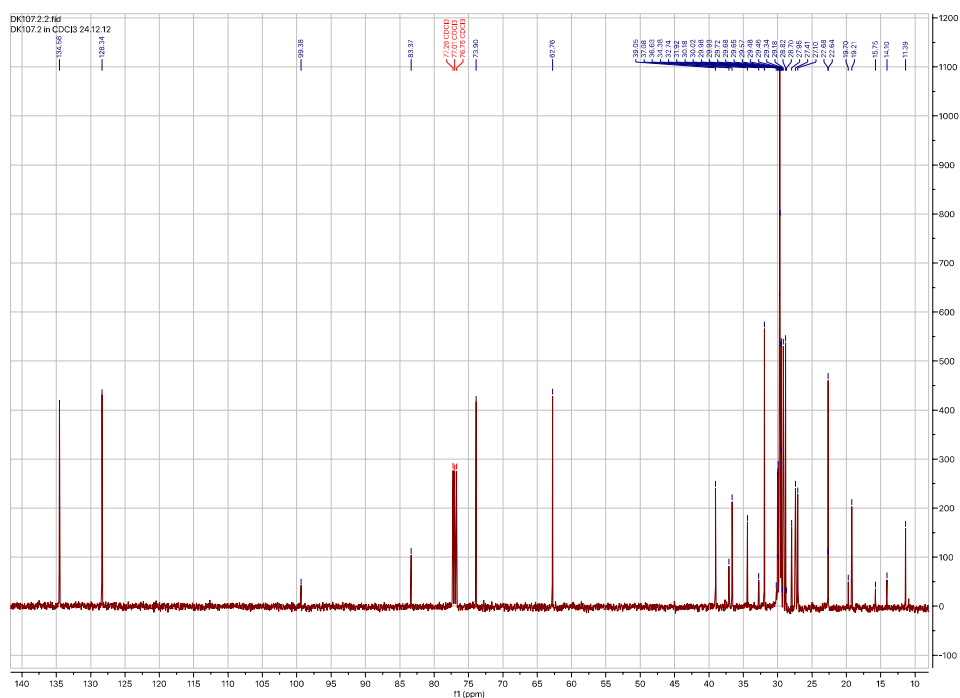

Table S19. NMR data of (3*R*)-19-methylicos-(4*E*)-en-1-yn-3-ol (**19**) in CDCl<sub>3</sub>.<sup>a</sup>

| Position | $\delta_C$ , mult. <sup>b</sup>    | $\delta_H$ , mult. $J$ (Hz) | LR H-C Correlations <sup>c</sup> |
|----------|------------------------------------|-----------------------------|----------------------------------|
| 1        | 73.9 <sup>d</sup> CH               | 2.55 d (2.0)                | 3                                |
| 2        | 83.4 <sup>e</sup> qC               | -                           | 1, 3, 4                          |
| 3        | 62.8 CH                            | 4.82 d (6.0)                | 1, 4, 5                          |
| 4        | 128.3 CH                           | 5.59 dd (15.0, 6.0)         | 3, 6                             |
| 5        | 134.6 CH                           | 5.90 dt (15.0, 7.0)         | 3, 6, 7                          |
| 6        | 31.9 CH <sub>2</sub>               | 2.05 q (7.0)                | 4, 5, 7, 8                       |
| 7        | 28.8 CH <sub>2</sub>               | 1.38 m                      | 5, 6, 8                          |
| 8-16     | $\sim 29.6^f 9 \times \text{CH}_2$ | 1.22 – 1.31 brm             |                                  |
| 17       | 27.4 CH <sub>2</sub>               | 1.24 m                      | 16, 18                           |
| 18       | 39.0 CH <sub>2</sub>               | 1.14 m                      | 17, 19, 20, 21                   |
| 19       | 27.9 CH                            | 1.50 qqt (6.0, 6.0, 6.0)    | 18, 20, 21                       |
| 20       | 22.6 CH <sub>3</sub>               | 0.85 d (6.0)                | 18, 19, 21                       |
| 21       | 22.6 CH <sub>3</sub>               | 0.85 d (6.0)                | 18, 19, 20                       |

<sup>a</sup>500.13 MHz for <sup>1</sup>H and 125.76 MHz for <sup>13</sup>C; <sup>b</sup>Multiplicity and assignment from HSQC experiment; <sup>c</sup>Determined from HMBC experiment; <sup>d</sup> $^1J = 250.0$  Hz; <sup>e</sup> $^2J = 49.0$  Hz; <sup>f</sup>Exact <sup>13</sup>C chemical shifts 29.45, 29.57, 29.67 ( $\times 6$ ), 29.71 ppm.

Figure S118. HRCIMS spectrum of (3*R*)-19-methylicos-(4*E*)-en-1-yn-3-ol (**19**)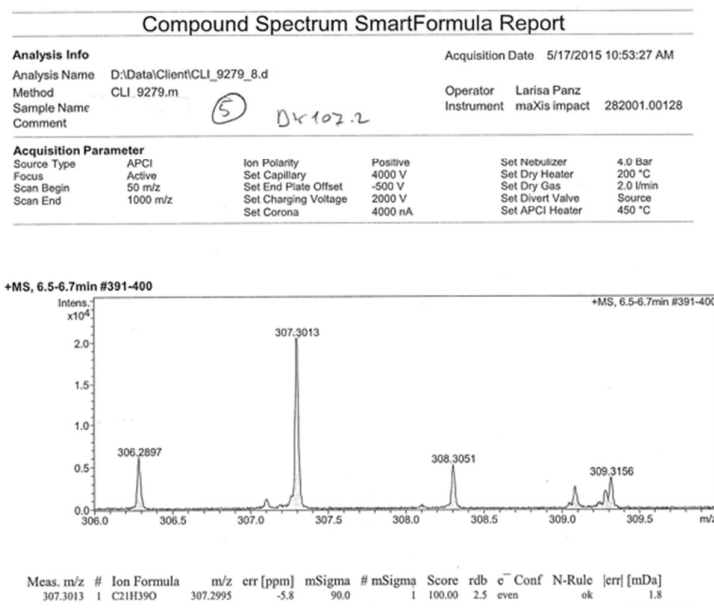

Figure S119.  $^1\text{H}$  NMR spectrum of (3*R*)-henicos-(4*E*)-en-1-yn-3-ol (**20**) in  $\text{CDCl}_3$

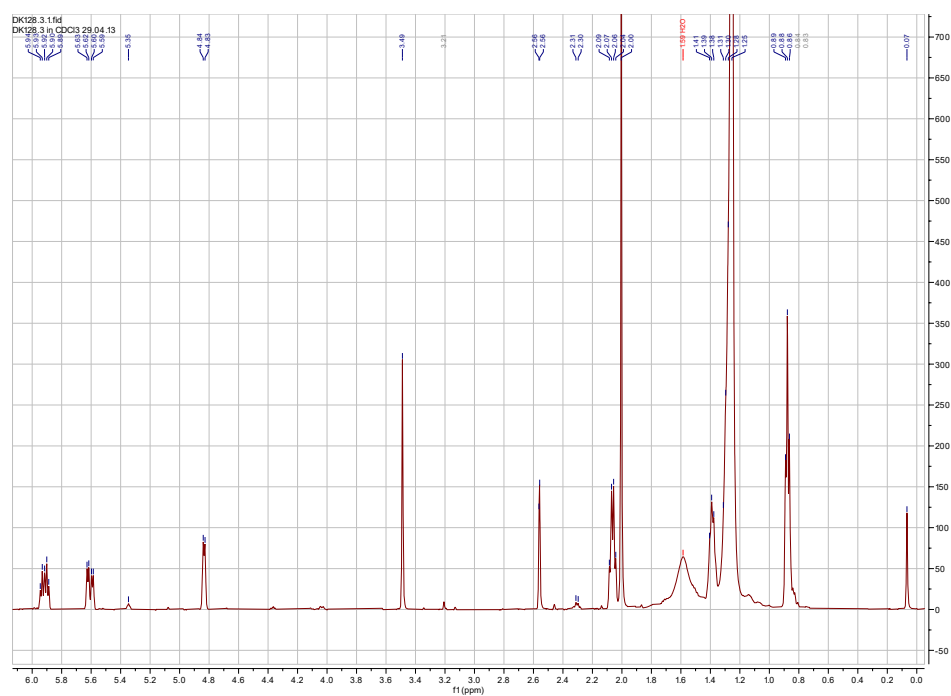

Table S20. NMR data of (3*R*)-henicos-(4*E*)-en-1-yn-3-ol (**20**) in  $\text{CDCl}_3$ .<sup>a</sup>

| Position | $\delta_{\text{H}}$ , mult. $J$ (Hz) | $\delta_{\text{H}}$ , mult. $J$ (Hz)<br>published <sup>b</sup> |
|----------|--------------------------------------|----------------------------------------------------------------|
| 1        | 2.56 s                               | 2.54 d (12.0)                                                  |
| 2        | -                                    | -                                                              |
| 3        | 4.83 d (6.0)                         | 4.82 d (5.5)                                                   |
| 4        | 5.61 dd (15.0, 6.0)                  | 5.58 ddt (15.0, 5.5, 1.0)                                      |
| 5        | 5.90 dt (15.0, 7.0)                  | 5.90 dtd (15.0, 7.0, 1.0)                                      |
| 6        | 2.07 q (7.0)                         | 2.04 q (7.0)                                                   |
| 7        | 1.39 m                               | 1.23 - 1.36 m                                                  |
| 8-18     | 1.23 - 1.30 brm                      | 1.23 - 1.36 m                                                  |
| 19       | 1.25 m                               | 1.23 - 1.36 m                                                  |
| 20a      | 1.39 m                               | 1.23 - 1.36 m                                                  |
| b        | 1.28 m                               | 1.23 - 1.36 m                                                  |
| 21       | 0.88 t (6.5)                         | 0.86 t (7.0)                                                   |

<sup>a</sup>500.13 MHz for  $^1\text{H}$  and 125.76 MHz for  $^{13}\text{C}$ ; <sup>b</sup>Hallock, Y. F.; Cardelina II, J. H.; Balaschak, M. S.; Alexander, M. R.; Prather, T.R.; Shoemaker, R. H.; Boyd, M. R. *J. Nat. Prod.* **1995**, *58*, 1801-1807.

Figure S120. CIGCMS spectrum of (3*R*)-henicos-(4*E*)-en-1-yn-3-ol (**20**)

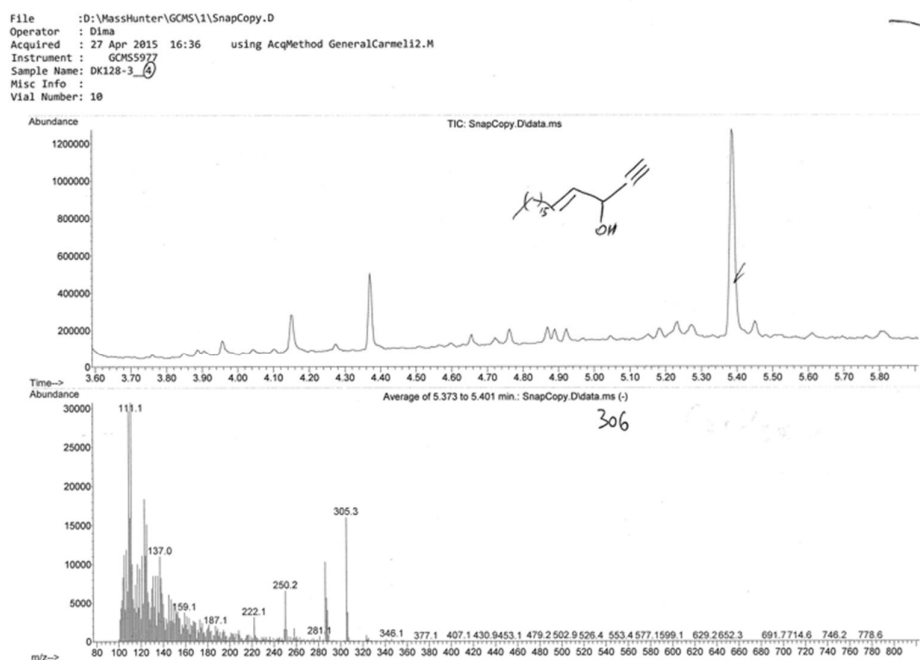

Figure S121. HRCIMS of (3*R*)-henicos-(4*E*)-en-1-yn-3-ol (**20**)

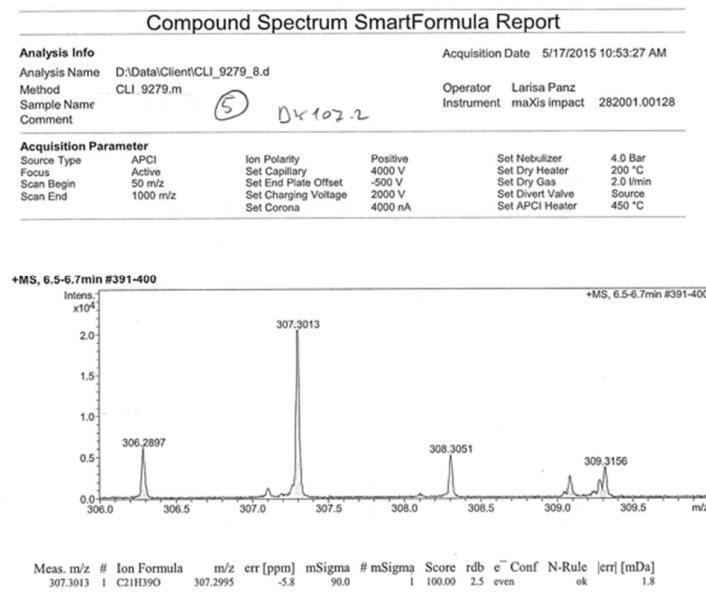

Figure S122.  $^1\text{H}$  NMR spectrum of (3*R*)-docos-(4*E*,15*Z*)-dien-1-yn-3-ol (**21**) in  $\text{CDCl}_3$

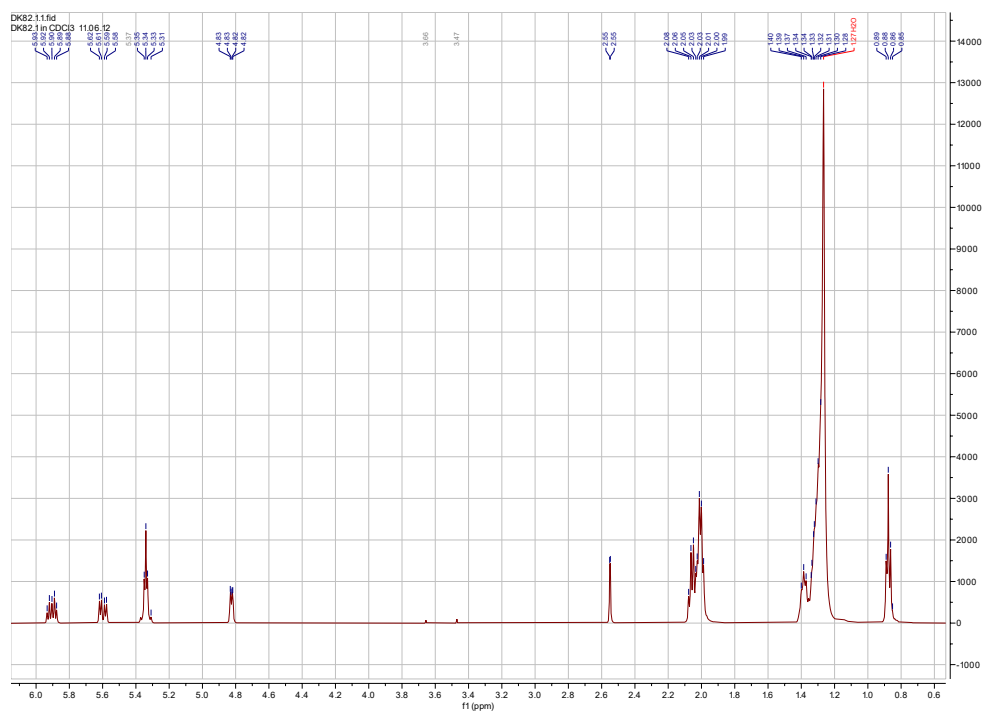

Figure S123.  $^{13}\text{C}$  NMR spectrum of (3*R*)-docos-(4*E*,15*Z*)-dien-1-yn-3-ol (**21**) in  $\text{CDCl}_3$

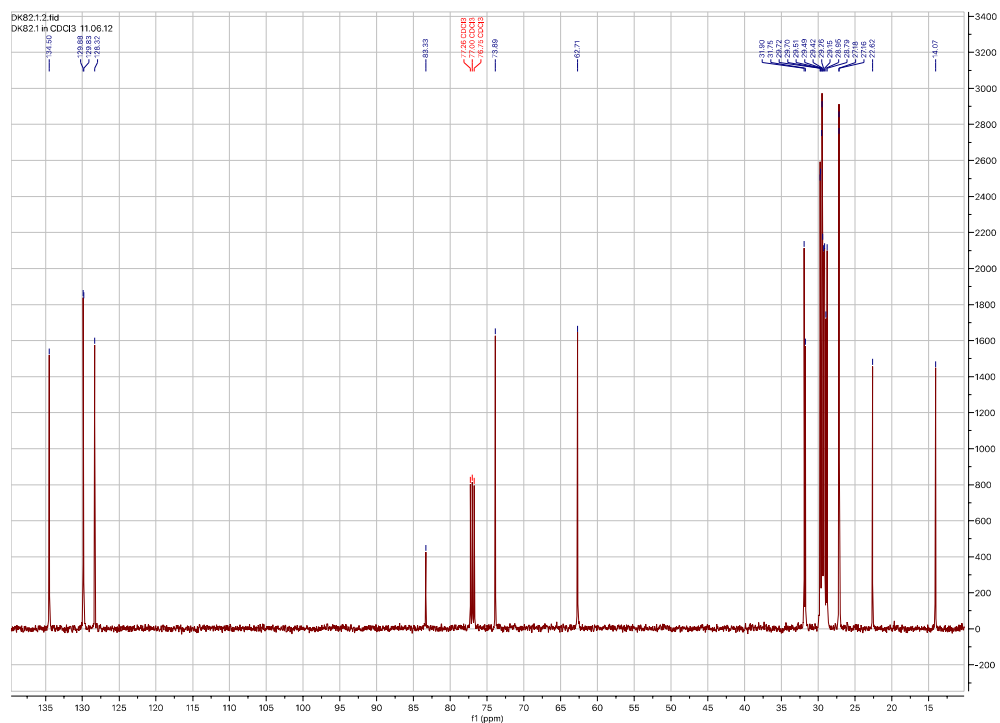

Table S21. NMR data of (3*R*)-docos-(4*E*,15*Z*)-dien-1-yn-3-ol (**21**) in CDCl<sub>3</sub>.<sup>a</sup>

| Position | $\delta_{\text{C}}$ , mult. <sup>b</sup>    | $\delta_{\text{H}}$ , mult. $J$ (Hz) | LR H-C Correlations <sup>c</sup> |
|----------|---------------------------------------------|--------------------------------------|----------------------------------|
| 1        | 73.9 <sup>d</sup> CH                        | 2.55 d (2.5)                         | 3                                |
| 2        | 83.3 <sup>e</sup> qC                        | -                                    | 1, 3, 4                          |
| 3        | 62.7 CH                                     | 4.82 brd (6.0)                       | 1, 4, 5                          |
| 4        | 128.3 CH                                    | 5.60 dd (15.0, 6.0)                  | 3, 6                             |
| 5        | 134.5 CH                                    | 5.91 dt (15.0, 7.5)                  | 3, 6, 7                          |
| 6        | 31.9 CH <sub>2</sub>                        | 2.05 q (7.5)                         | 4, 5, 7, 8                       |
| 7        | 28.8 CH <sub>2</sub>                        | 1.38 m                               | 5, 6, 8                          |
| 8-13     | $\sim 29.6^{\text{f}} 6 \times \text{CH}_2$ | 1.22 – 1.30 brm                      |                                  |
| 14       | 27.2 CH <sub>2</sub>                        | 2.01 q (5.5)                         | 13, 15                           |
| 15       | 129.8 CH                                    | 5.34 t (5.5)                         | 13, 14                           |
| 16       | 129.9 CH                                    | 5.34 t (5.5)                         | 17, 18                           |
| 17       | 27.2 CH <sub>2</sub>                        | 2.01 m                               | 16, 18                           |
| 18-19    | $29.6^{\text{f}} 2 \times \text{CH}_2$      | 1.22 – 1.30 brm                      |                                  |
| 20       | 31.7 CH <sub>2</sub>                        | 1.25 m                               | 19, 21a, 21b, 22                 |
| 21a      | 22.6 CH <sub>2</sub>                        | 1.32 m                               | 22, 24                           |
| b        |                                             | 1.27 m                               |                                  |
| 22       | 14.1 CH <sub>3</sub>                        | 0.88 t (6.7)                         | 20, 21a, 21b                     |

<sup>a</sup>500.13 MHz for <sup>1</sup>H and 125.76 MHz for <sup>13</sup>C; <sup>b</sup>Multiplicity and assignment from HSQC experiment;<sup>c</sup>Determined from HMBC experiment; <sup>d</sup>1  $J$  = 252.0 Hz; <sup>e</sup>2  $J$  = 49.0 Hz; <sup>f</sup>Exact <sup>13</sup>C chemical shifts 28.95, 29.15, 29.25, 29.42, 29.49 ( $\times 2$ ), 29.70, 29.72 ppm.Figure S124. EIGCMS spectrum of (3*R*)-docos-(4*E*,15*Z*)-dien-1-yn-3-ol (**21**)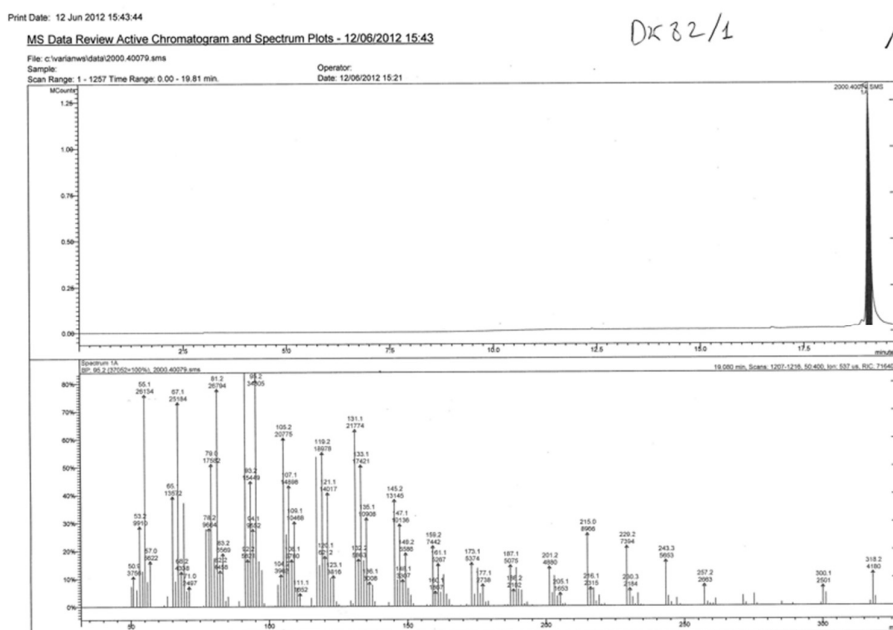



Figure S125.  $^1\text{H}$  NMR spectrum of (3*R*)-21-methyldocos-(4*E*,15*Z*)-dien-1-yn-3-ol (**22**) in  $\text{CDCl}_3$

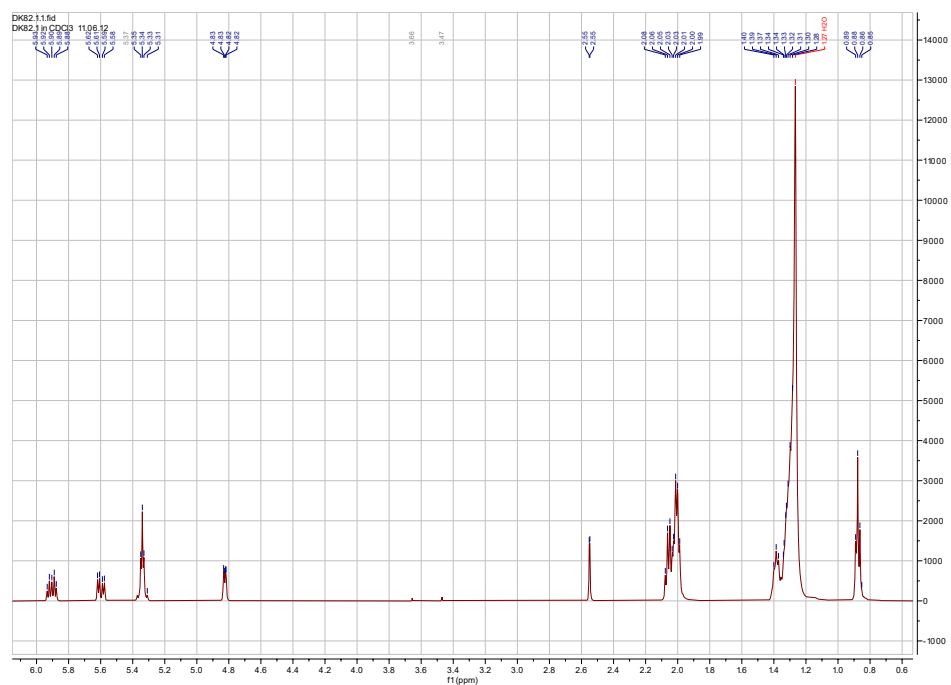

Figure S126.  $^{13}\text{C}$  NMR spectrum of (3*R*)-21-methyldocos-(4*E*,15*Z*)-dien-1-yn-3-ol (**22**) in  $\text{CDCl}_3$

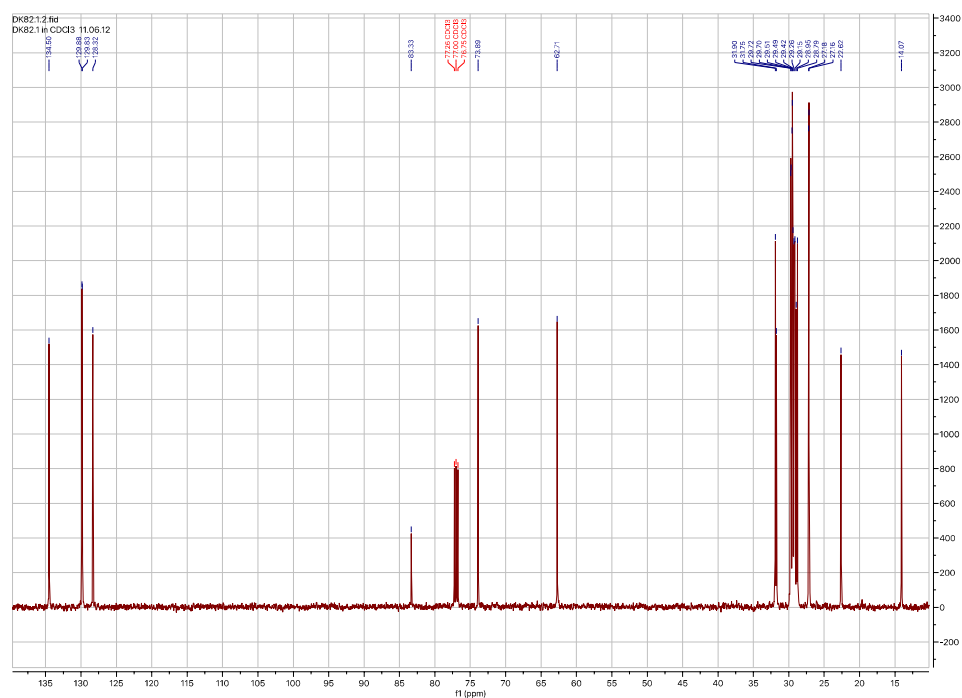

Table S22. NMR data of (3*R*)-21-methyldocos-(4*E*,15*Z*)-dien-1-yn-3-ol (**22**) in CDCl<sub>3</sub>.<sup>a</sup>

| Position | $\delta_{\text{C}}$ , mult. <sup>b</sup> | $\delta_{\text{H}}$ , mult. $J$ (Hz) | LR H-C Correlations <sup>c</sup> |
|----------|------------------------------------------|--------------------------------------|----------------------------------|
| 1        | 73.9 <sup>d</sup> CH                     | 2.56 s                               | 3                                |
| 2        | 83.3 <sup>e</sup> qC                     | -                                    | 1, 3, 4                          |
| 3        | 62.8 CH                                  | 4.83 brd (6.0)                       | 1, 4, 5                          |
| 4        | 128.3 CH                                 | 5.61 dd (15.0, 6.0)                  | 3, 6                             |
| 5        | 134.6 CH                                 | 5.91 dt (15.0, 7.0)                  | 3, 6, 7                          |
| 6        | 31.9 CH <sub>2</sub>                     | 2.06 q (7.0)                         | 4, 5, 7, 8                       |
| 7        | 28.8 CH <sub>2</sub>                     | 1.39 m                               | 5, 6, 8                          |
| 8-13     | $\sim 29.6^f 6 \times \text{CH}_2$       | 1.24 – 1.32 brm                      |                                  |
| 14       | 27.2 CH <sub>2</sub>                     | 2.01 m                               | 13, 15                           |
| 15       | 129.9 CH                                 | 5.34 t (4.0)                         | 13, 14                           |
| 16       | 129.9 CH                                 | 5.34 t (4.0)                         | 17, 18                           |
| 17       | 27.2 CH <sub>2</sub>                     | 2.01 m                               | 16, 18                           |
| 18       | 30.0 CH <sub>2</sub>                     | 1.31 m                               |                                  |
| 19       | 27.2 CH <sub>2</sub>                     | 1.28 m                               | 18, 20                           |
| 20       | 39.3 CH <sub>2</sub>                     | 1.17 m                               | 19, 21, 22, 23                   |
| 21       | 28.0 CH                                  |                                      | 20, 22, 23                       |
| 22       | 22.6 CH <sub>3</sub>                     | 0.85 d (6.5)                         | 20, 21, 23                       |
| 23       | 22.6 CH <sub>3</sub>                     | 0.85 d (6.5)                         | 20, 21, 22                       |

<sup>a</sup>500.13 MHz for <sup>1</sup>H and 125.76 MHz for <sup>13</sup>C; <sup>b</sup>Multiplicity and assignment from HSQC experiment;<sup>c</sup>Determined from HMBC experiment; <sup>d</sup> <sup>1</sup>J = 251.0 Hz; <sup>e</sup> <sup>2</sup>J = 49.5 Hz; <sup>f</sup>Exact <sup>13</sup>C chemical shifts 29.17, 29.29, 29.44, 29.53 ( $\times 2$ ), 29.73 ppm.Figure S127. EIMS spectrum of (3*R*)-21-methyldocos-(4*E*,15*Z*)-dien-1-yn-3-ol (**22**)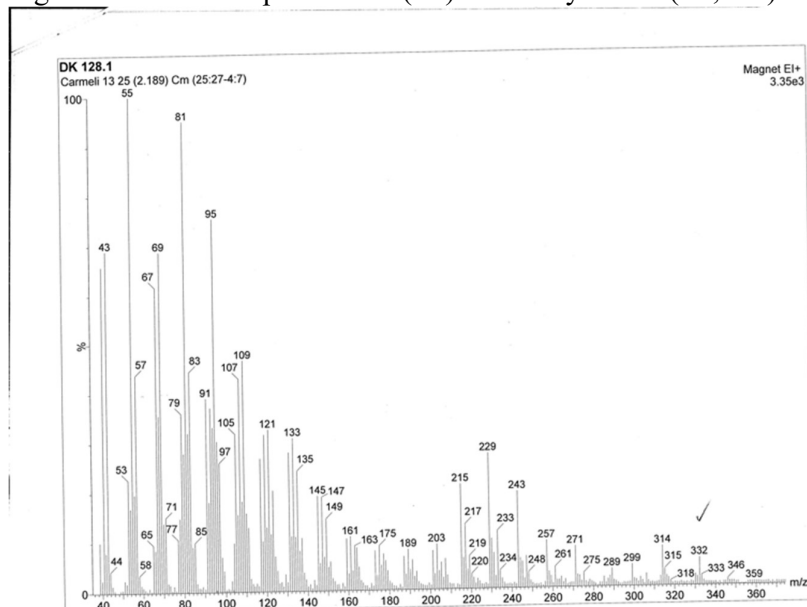

Figure S128.  $^1\text{H}$  NMR spectrum of (3*R*)-14-methyldocos-1-yn-3-ol (**23**) in  $\text{CDCl}_3$

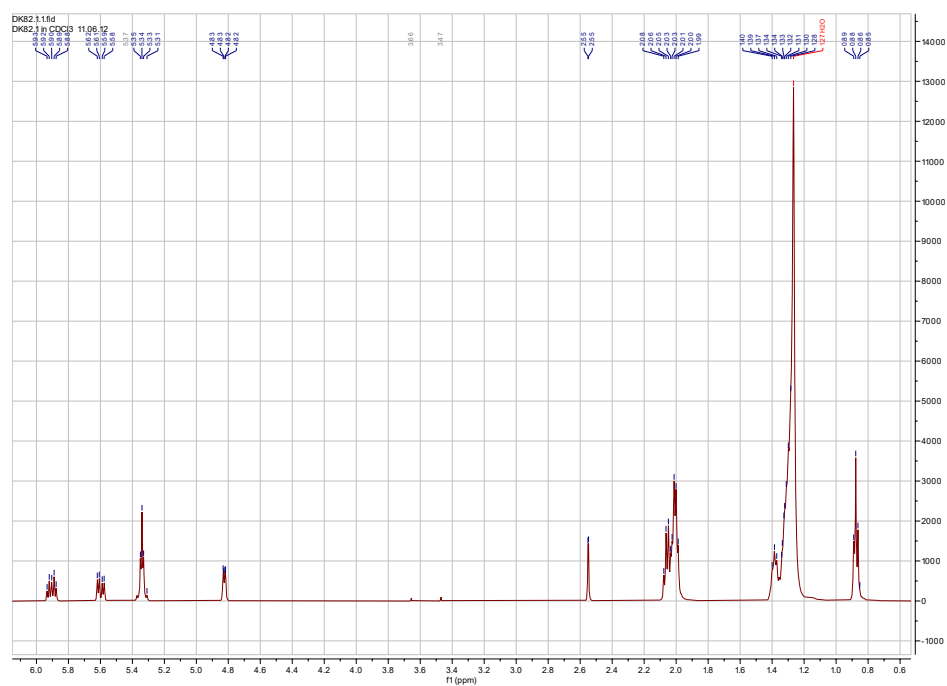

Figure S129.  $^{13}\text{C}$  NMR spectrum of (3*R*)-14-methyldocos-1-yn-3-ol (**23**) in  $\text{CDCl}_3$

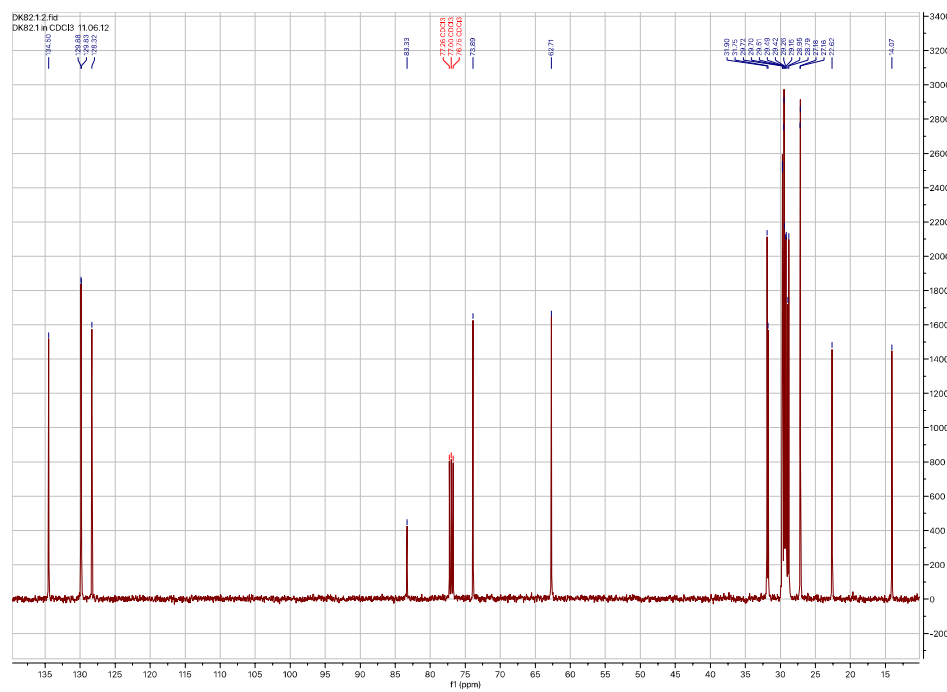

Table S23. NMR data of (3*R*)-14-methyldocos-1-yn-3-ol (**23**) in CDCl<sub>3</sub>.<sup>a</sup>

| Position | $\delta_{\text{C}}$ , mult. <sup>b</sup>      | $\delta_{\text{H}}$ , mult. $J$ (Hz) | LR H-C Correlations <sup>c</sup> |
|----------|-----------------------------------------------|--------------------------------------|----------------------------------|
| 1        | 73.9 <sup>d</sup> CH                          | 2.55 d (2.0)                         | 3                                |
| 2        | 83.4 <sup>e</sup> qC                          | -                                    | 1, 3, 4                          |
| 3        | 62.8 CH                                       | 4.82 brd (5.5)                       | 1, 4, 5                          |
| 4        | 128.3 CH                                      | 5.60 dd (15.3, 6.0)                  | 3, 6                             |
| 5        | 134.5 CH                                      | 5.90 dt (15.3, 7.0)                  | 3, 6, 7                          |
| 6        | 31.9 CH <sub>2</sub>                          | 2.06 q (7.0)                         | 4, 5, 7, 8                       |
| 7        | 28.8 CH <sub>2</sub>                          | 1.38 m                               | 5, 6, 8                          |
| 8-11     | ~29.5 <sup>f</sup> 4 $\times$ CH <sub>2</sub> | 1.23 – 1.26 brm                      |                                  |
| 12       | 27.1 CH <sub>2</sub>                          | 1.24 m                               | 11, 13a, 13b                     |
| 13a      | 37.1 CH <sub>2</sub>                          | 1.26 m                               | 12, 14, 15a, 15b, 23             |
| b        |                                               | 1.06 m                               |                                  |
| 14       | 32.7 CH                                       | 1.34 m                               | 13a, 13b, 15a, 15a, 23           |
| 15a      | 37.1 CH <sub>2</sub>                          | 1.26 m                               | 13a, 13b, 14, 16, 23             |
| b        |                                               | 1.06 m                               |                                  |
| 16       | 27.0 CH <sub>2</sub>                          | 1.23 m                               | 15a, 15b, 17                     |
| 17-19    | ~29.5 <sup>f</sup> 3 $\times$ CH <sub>2</sub> | 1.23 – 1.26 brm                      |                                  |
| 20       | 31.9 CH <sub>2</sub>                          | 1.24 m                               | 19, 21a, 21b, 22                 |
| 21a      | 22.7 CH <sub>2</sub>                          | 1.31 m                               | 20, 22                           |
| b        |                                               | 1.25 m                               |                                  |
| 22       | 14.1 CH <sub>3</sub>                          | 0.87 t (6.7)                         | 21a, 21b                         |
| 23       | 19.7 CH <sub>3</sub>                          | 0.83 d (6.5)                         | 13b, 15b                         |

<sup>a</sup>500.13 MHz for <sup>1</sup>H and 125.76 MHz for <sup>13</sup>C; <sup>b</sup>Multiplicity and assignment from HSQC experiment;<sup>c</sup>Determined from HMBC experiment; <sup>d</sup>  $^1J = 250.5$  Hz; <sup>e</sup>  $^2J = 48.3$  Hz; <sup>f</sup>Exact <sup>13</sup>C chemical shifts 29.17, 29.34, 29.46, 29.60, 29.67, 29.98, 30.00 ppm.

Figure S130. EIMS of (3*R*)-14-methyldocos-1-yn-3-ol (**23**)

File : C:\MSDCHEM\1\DATA\SMB DATA 7\_11\Snapshot\AVIV884.D  
Operator :  
Acquired : 15 Mar 2012 11:34 using AcqMethod SMB GC-MS.M  
Instrument : GC-MSD  
Sample Name: DK72/10  
Misc Info : DK72/10  
Vial Number: 1

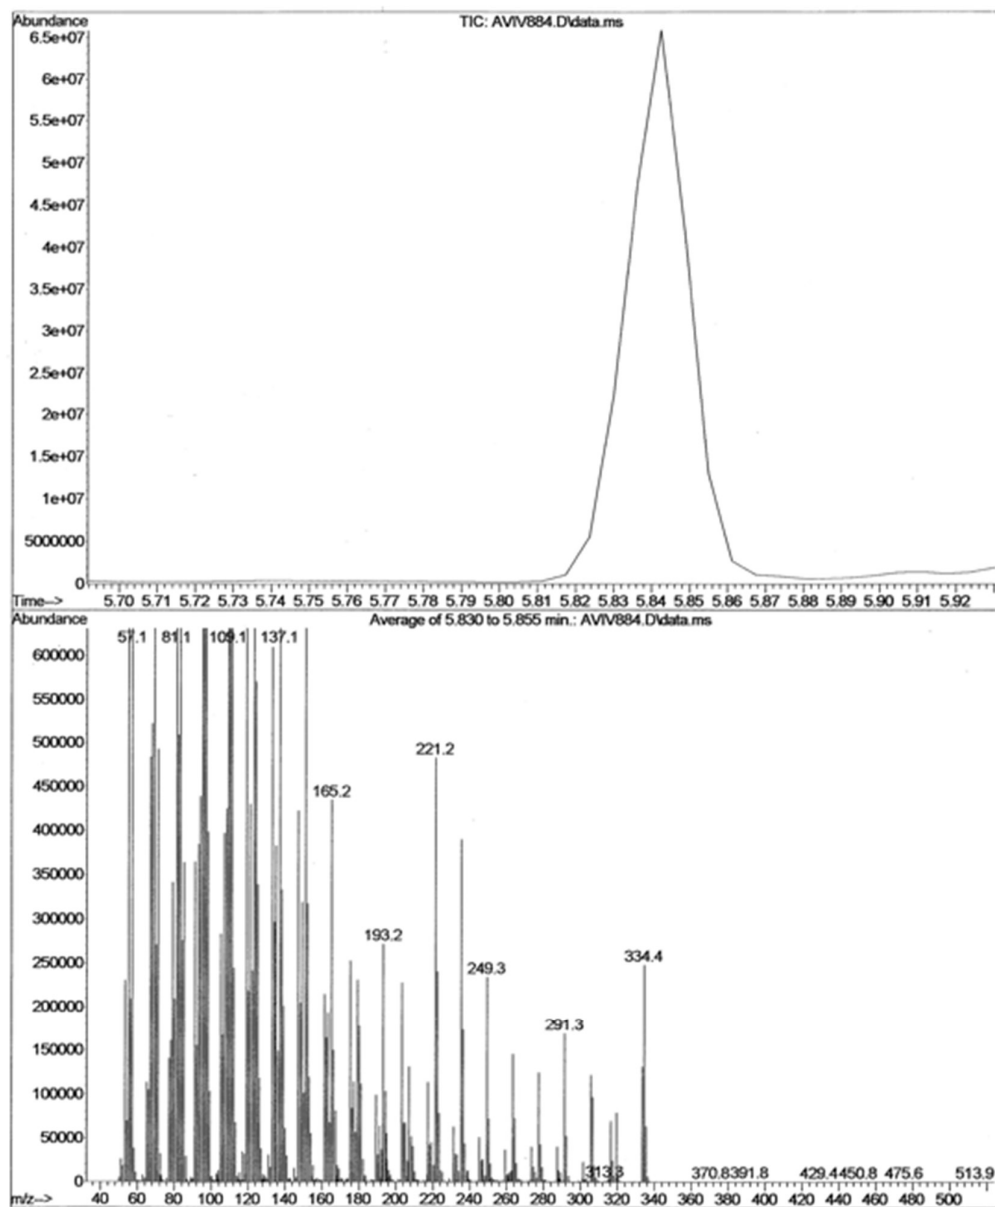

Figure S131.  $^1\text{H}$  NMR spectrum of (4*E*,6*E*)-docosa-4,6-dien-1-yn-3-ol (*rac*-27) in  $\text{CDCl}_3$

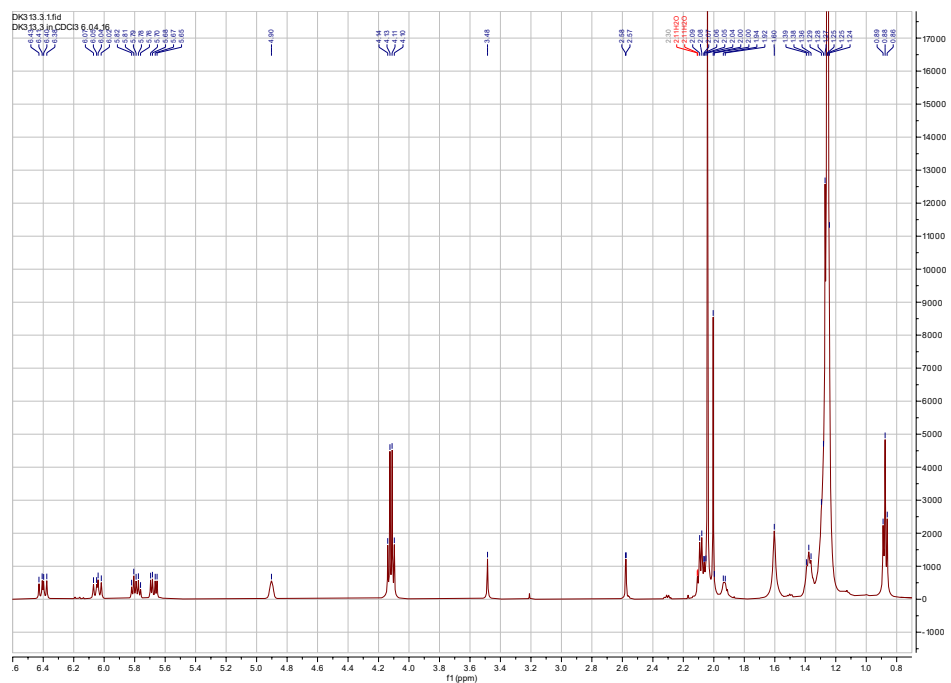

Figure S132.  $^{13}\text{C}$  NMR spectrum of (4*E*,6*E*)-docosa-4,6-dien-1-yn-3-ol (*rac*-27) in  $\text{CDCl}_3$

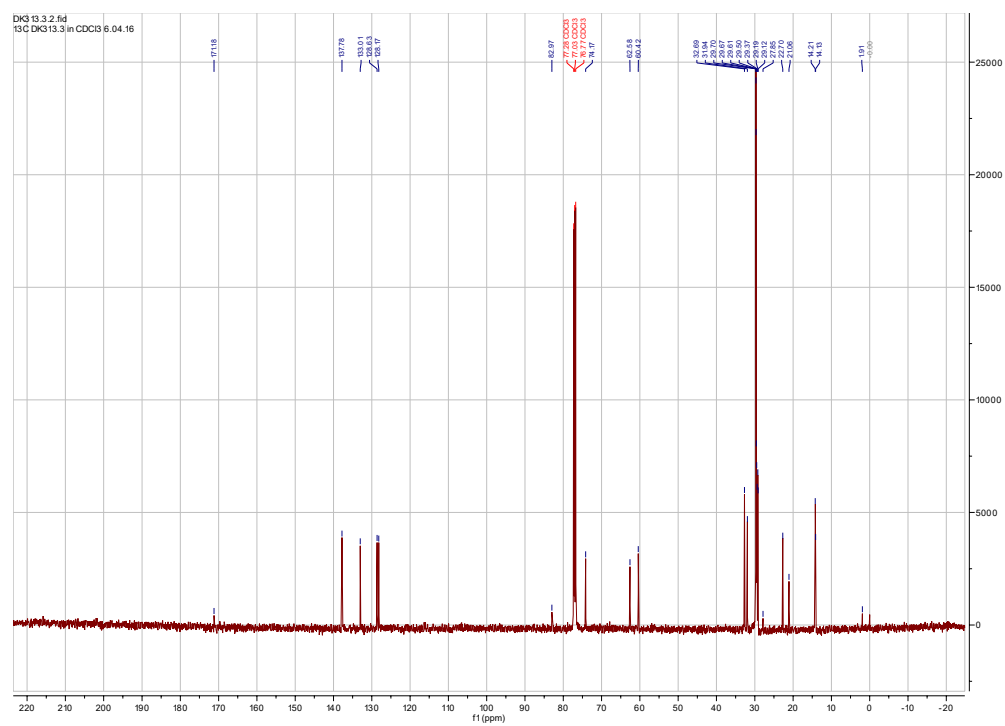

Figure S133. HREIMS of (4*E*,6*E*)-docosa-4,6-dien-1-yn-3-ol (*rac*-27)

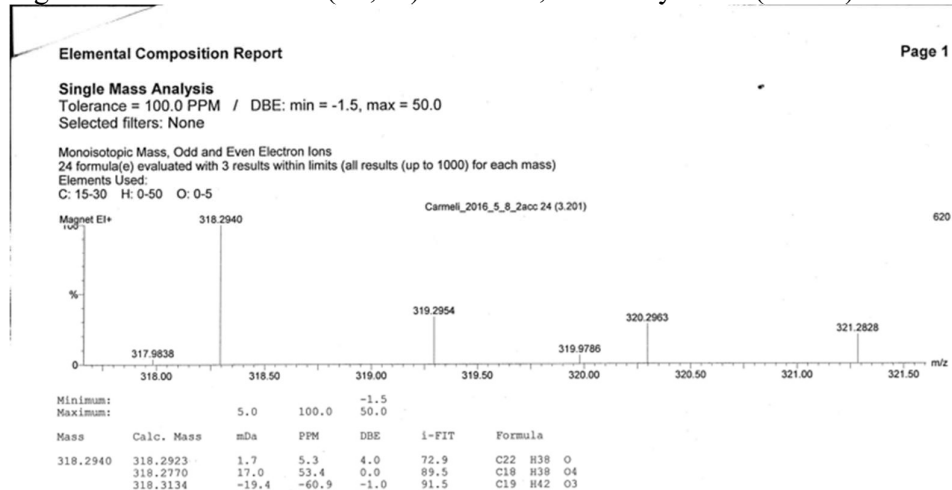

[illegible]



Figure S136.  $^1\text{H}$  NMR spectrum of dodec-1-yn-3-ol (*rac*-**31**) in  $\text{CDCl}_3$

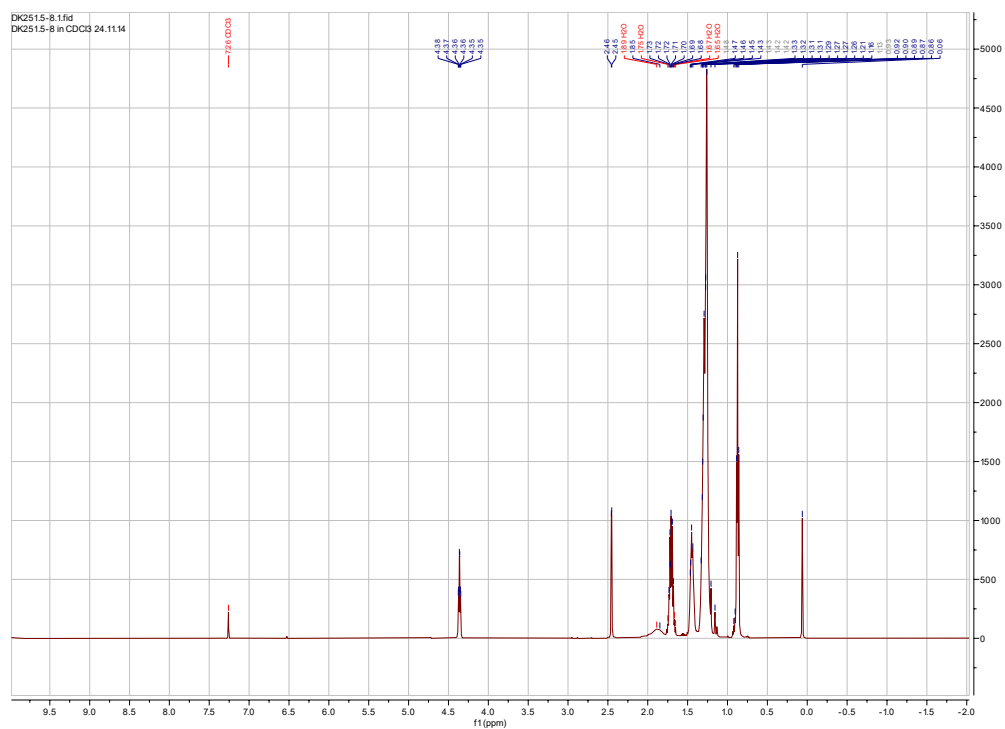

Figure S137.  $^{13}\text{C}$  NMR spectrum of dodec-1-yn-3-ol (*rac*-**31**) in  $\text{CDCl}_3$

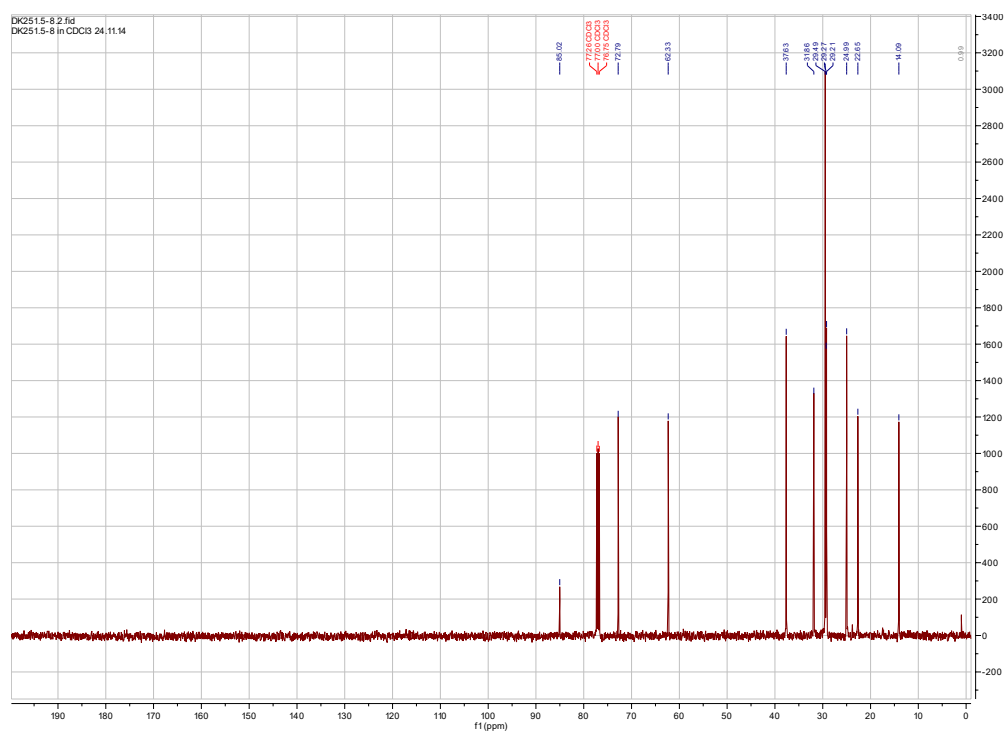

Figure S138. HRCIMS of dodec-1-yn-3-ol (*rac*-31)

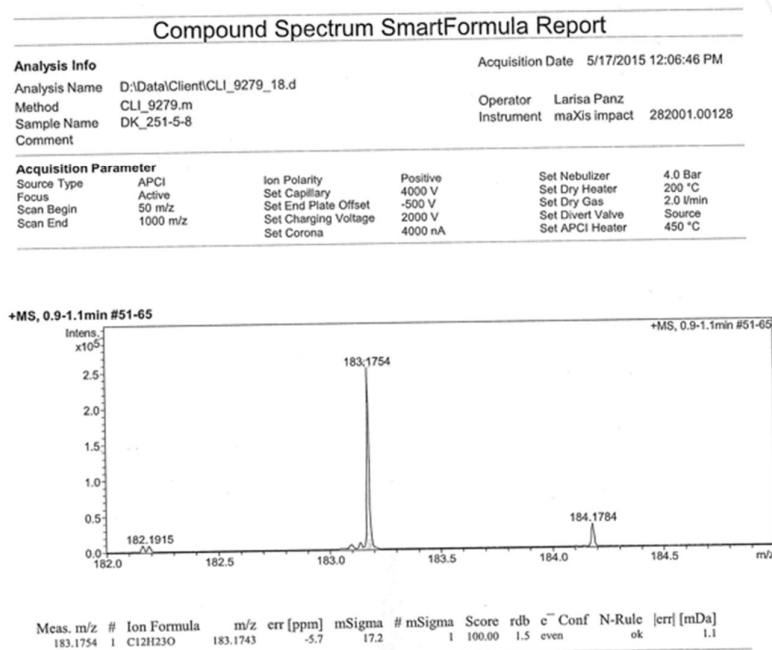

Figure S139.  $^1\text{H}$  NMR spectrum of octadec-1-yn-3-ol (*rac*-32) in  $\text{CDCl}_3$

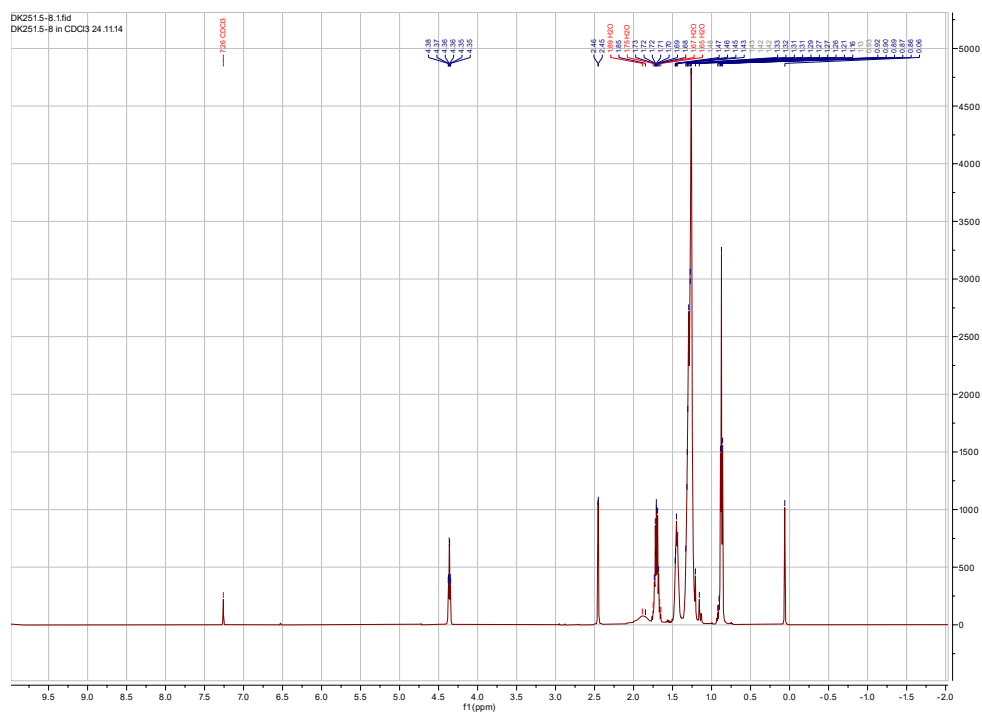

Figure S140.  $^{13}\text{C}$  NMR spectrum of octadec-1-yn-3-ol (*rac*-32) in  $\text{CDCl}_3$

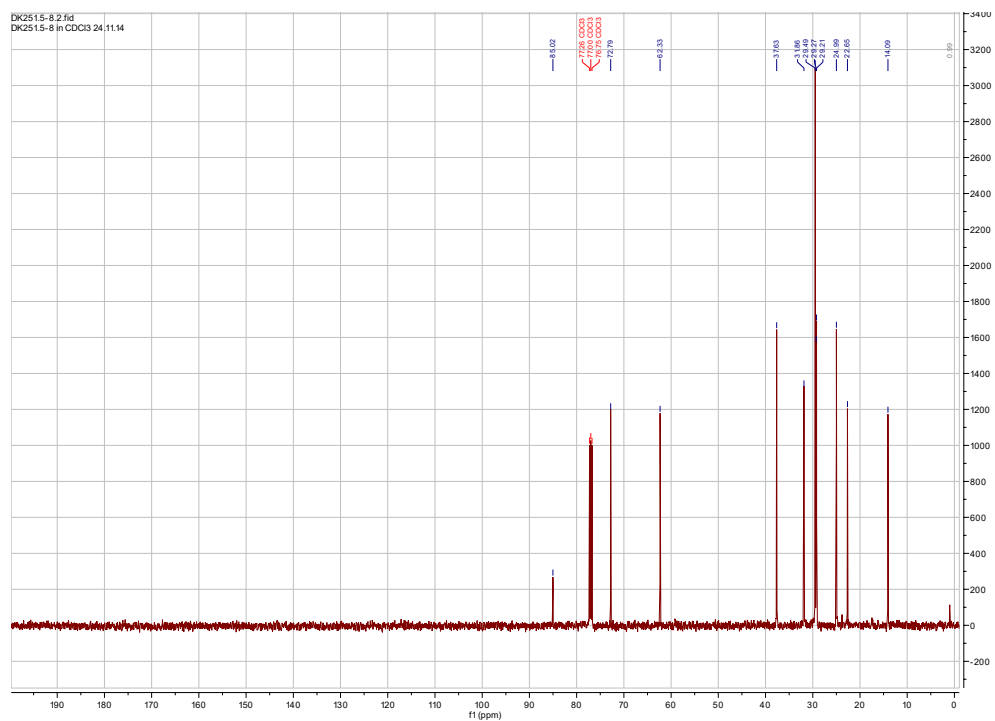

Figure S141. CIGCMS of octadec-1-yn-3-ol (*rac*-32)

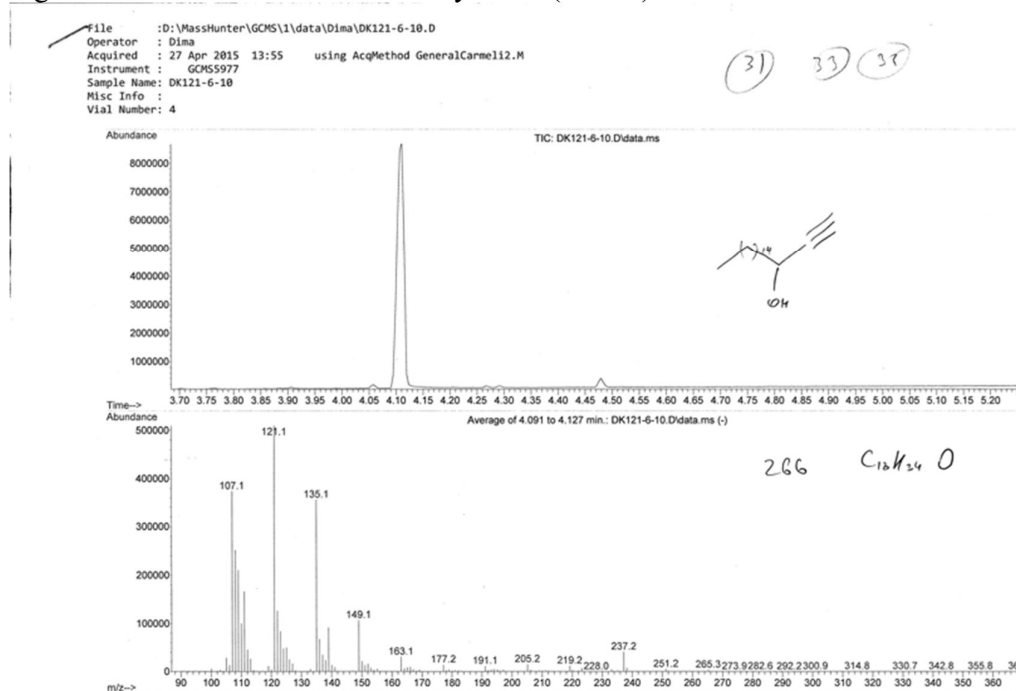

Figure S142. HRCIMS of octadec-1-yn-3-ol (*rac*-32)

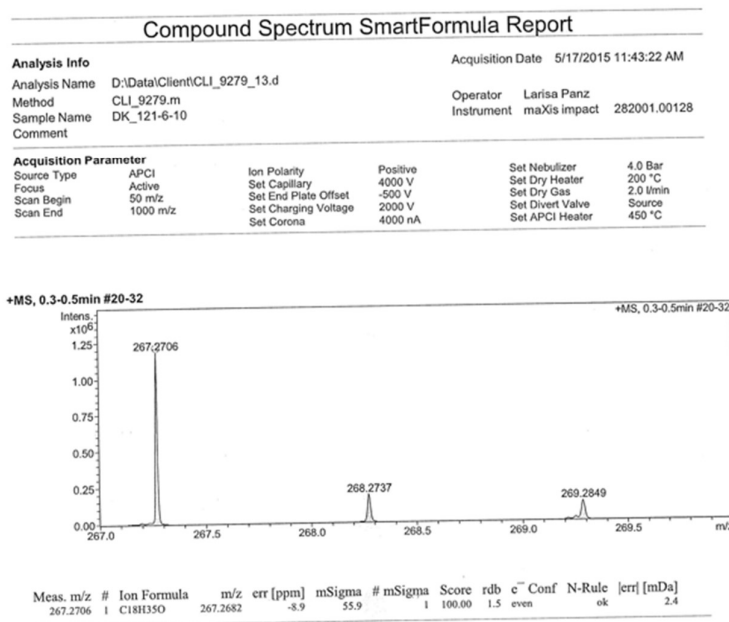

Figure S143.  $^1\text{H}$  NMR spectrum of octadec-1-yn-3-ol (**R-32**) in  $\text{CDCl}_3$

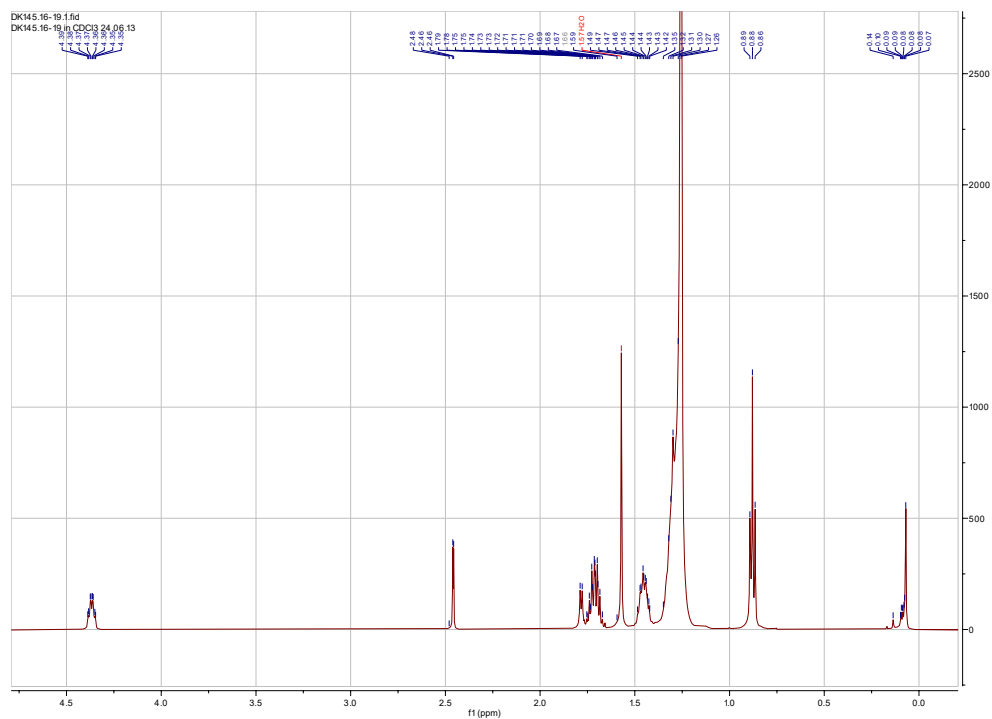

Figure S144.  $^1\text{H}$  NMR spectrum of octadec-1-yn-3-ol (**S-32**) in  $\text{CDCl}_3$

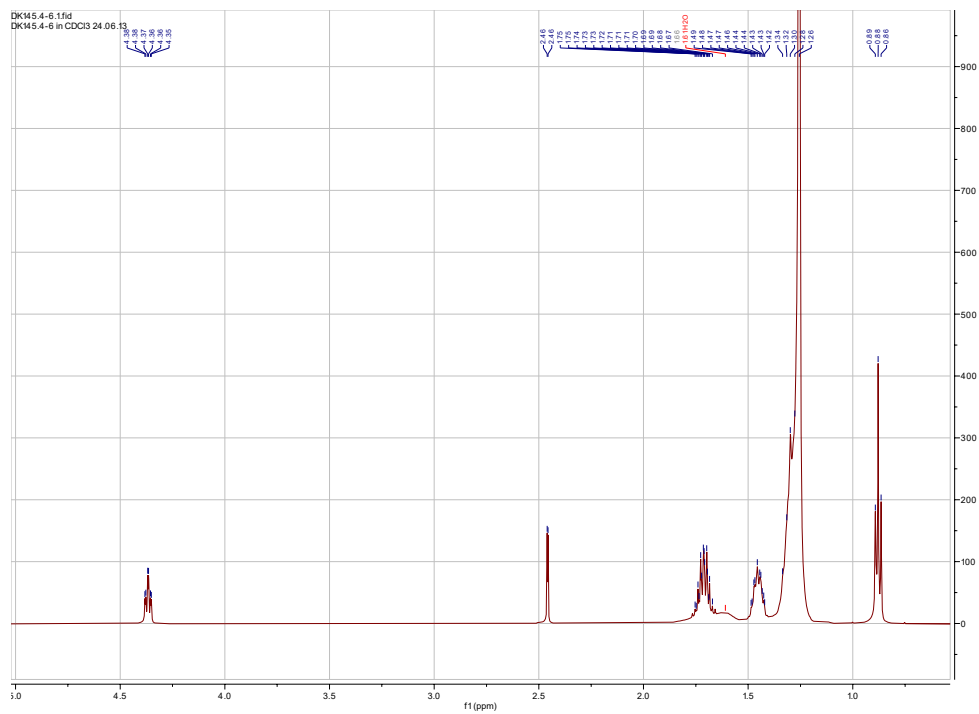

Figure S145.  $^1\text{H}$  NMR spectrum of icos-1-yn-3-ol (*rac*-**33**) in  $\text{CDCl}_3$

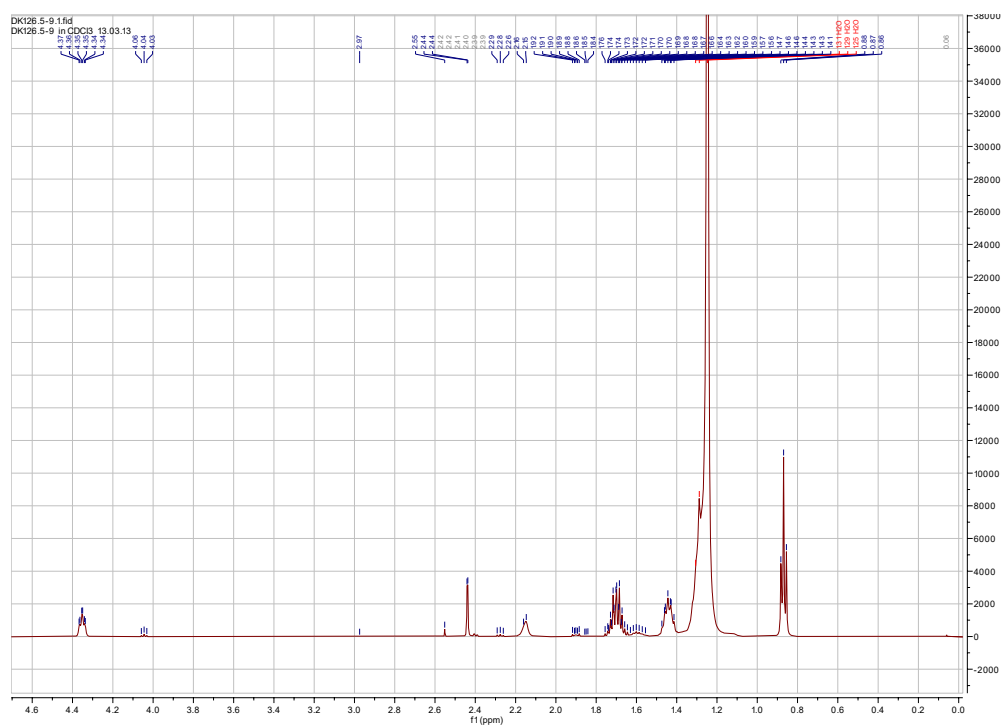

Figure S146.  $^{13}\text{C}$  NMR spectrum of icos-1-yn-3-ol (*rac*-**33**) in  $\text{CDCl}_3$

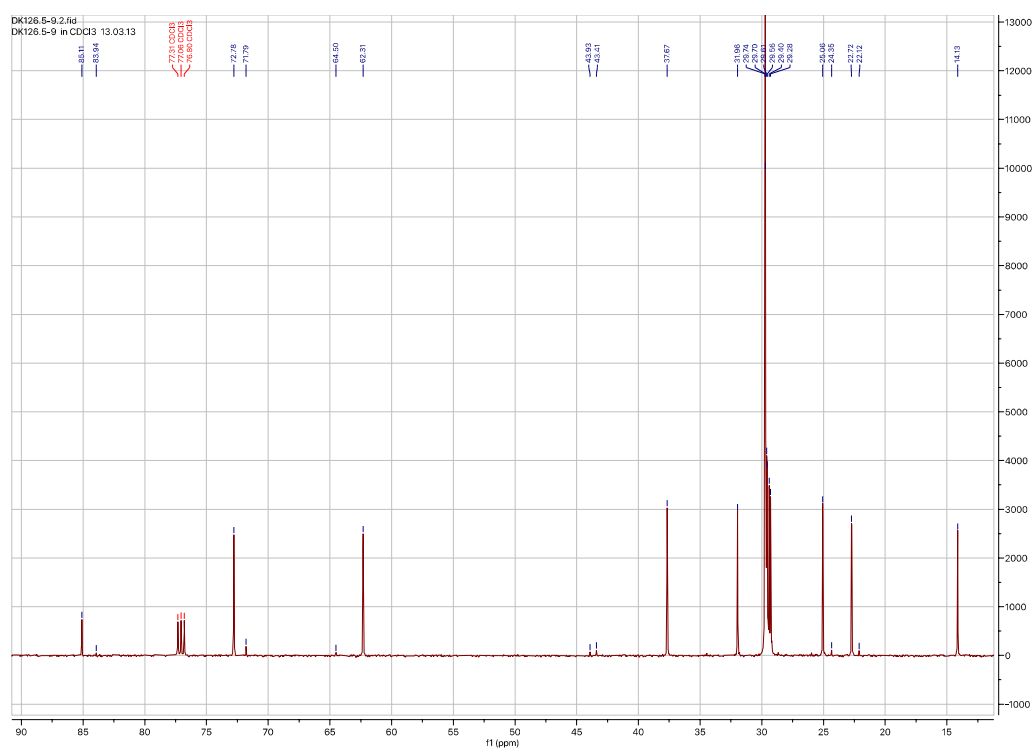

Figure S147. CIGCMS of icos-1-yn-3-ol (*rac*-33)

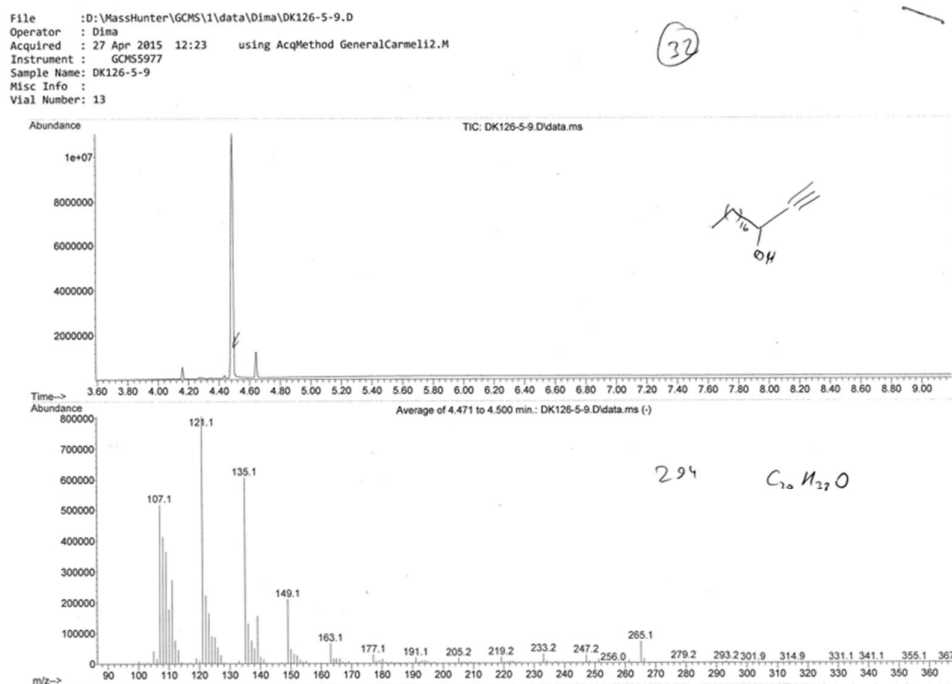

Figure S148. HRCIMS of icos-1-yn-3-ol (*rac*-33)

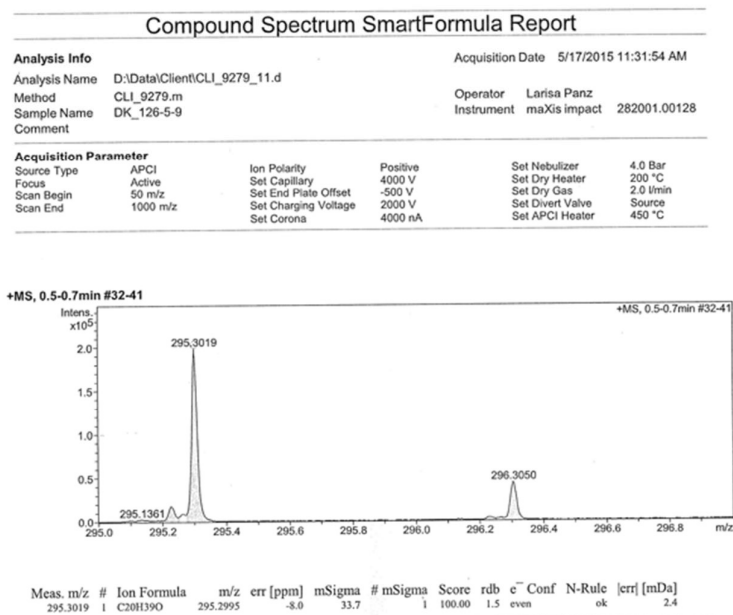

Figure S149.  $^1\text{H}$  NMR spectrum of (*R*)-((*S*)-octadec-1-yn-3-yl)-3,3,3-trifluoro-2-methoxy-2-phenylpropanoate ((*R,S*)-**34**) in  $\text{CDCl}_3$

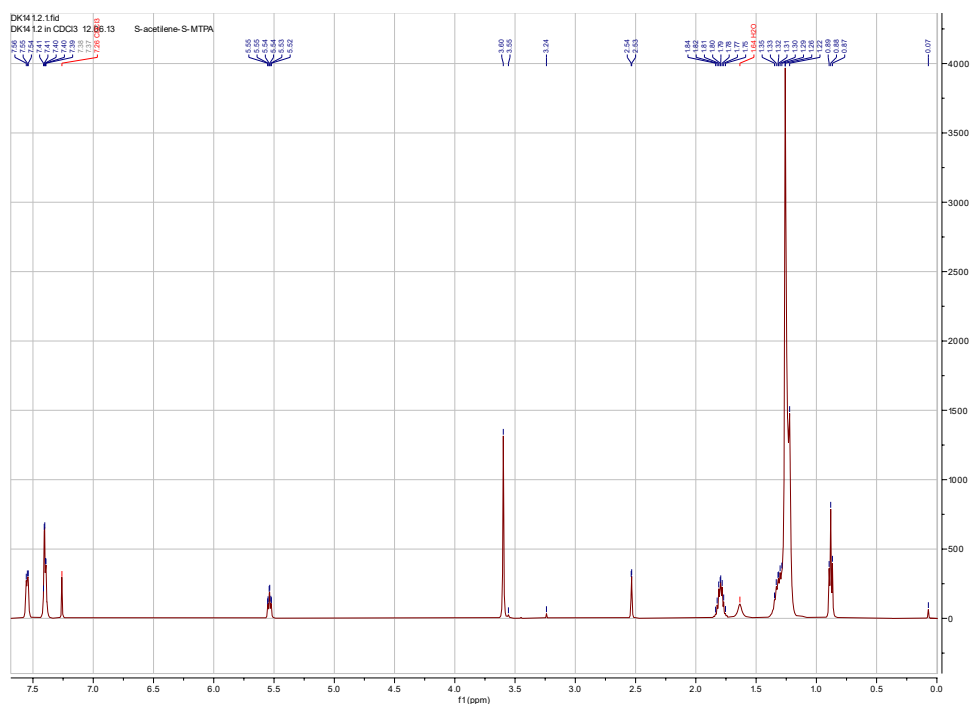

Figure S150.  $^{13}\text{C}$  NMR spectrum of (*R*)-((*S*)-octadec-1-yn-3-yl)-3,3,3-trifluoro-2-methoxy-2-phenylpropanoate ((*R,S*)-**34**) in  $\text{CDCl}_3$

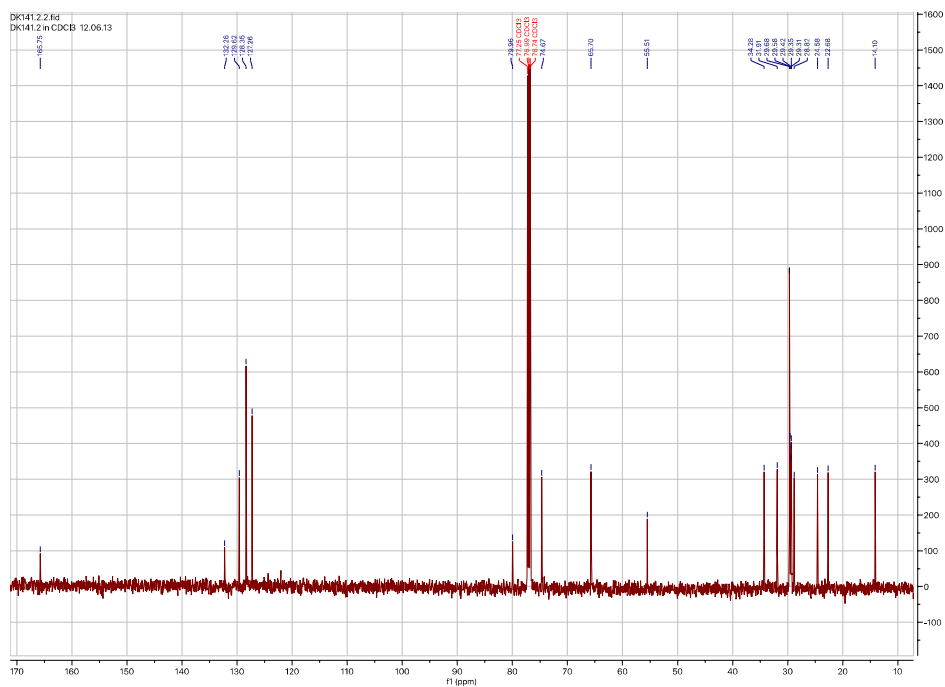





Figure S153.  $^1\text{H}$  NMR spectrum of octadec-1-yn-3-yl 4-methylbenzenesulfonate (*rac*-**35**) in  $\text{CDCl}_3$

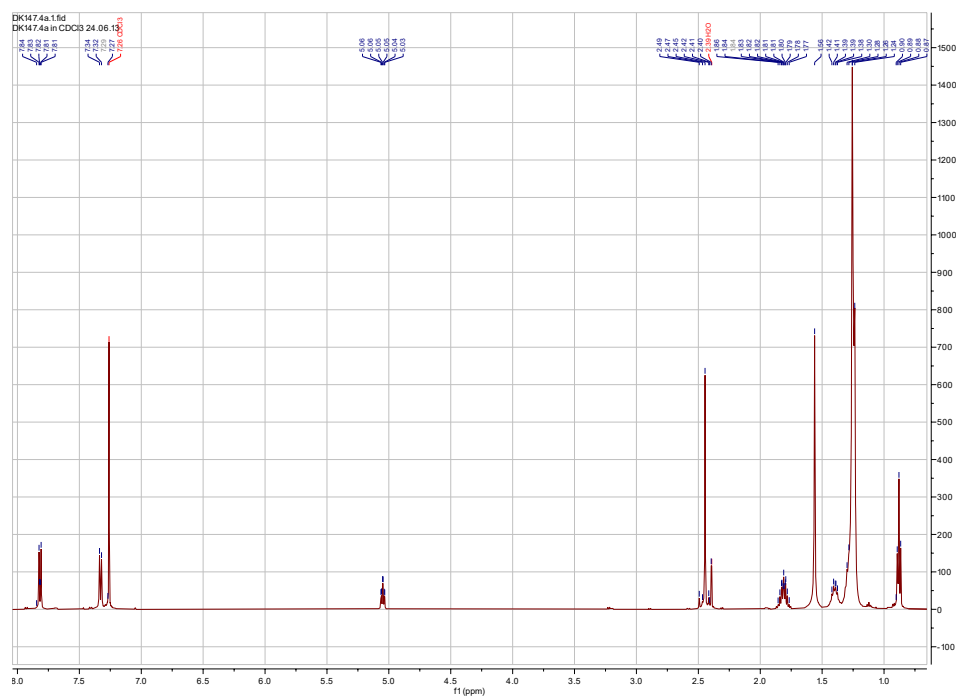

Figure S154.  $^{13}\text{C}$  NMR spectrum of octadec-1-yn-3-yl 4-methylbenzenesulfonate (*rac*-**35**) in  $\text{CDCl}_3$

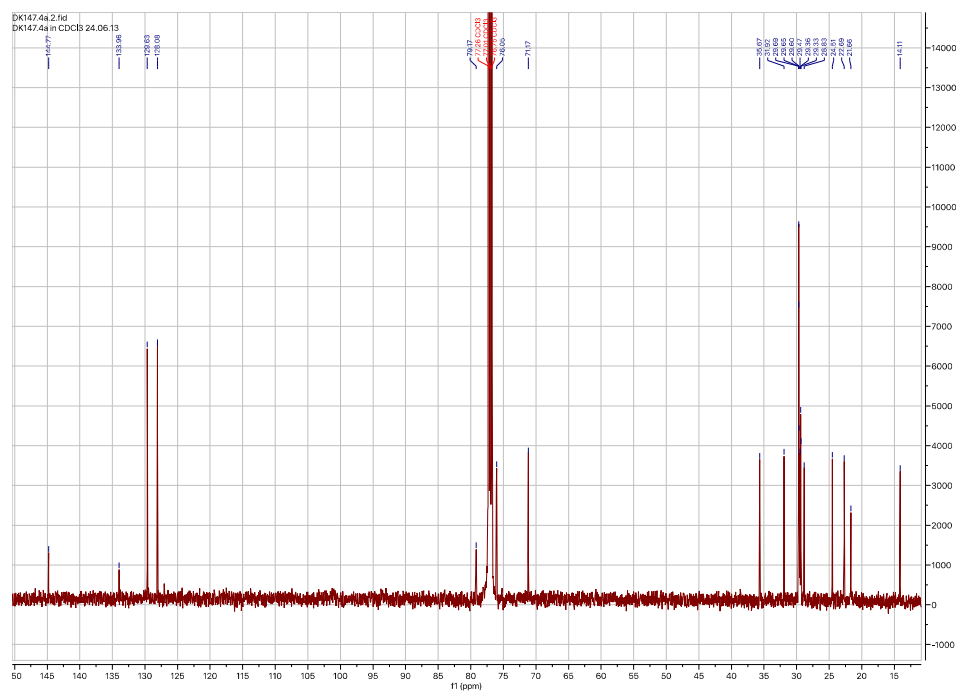

Figure S155. ESIMS of octadec-1-yn-3-yl 4-methylbenzenesulfonate (*rac*-35)

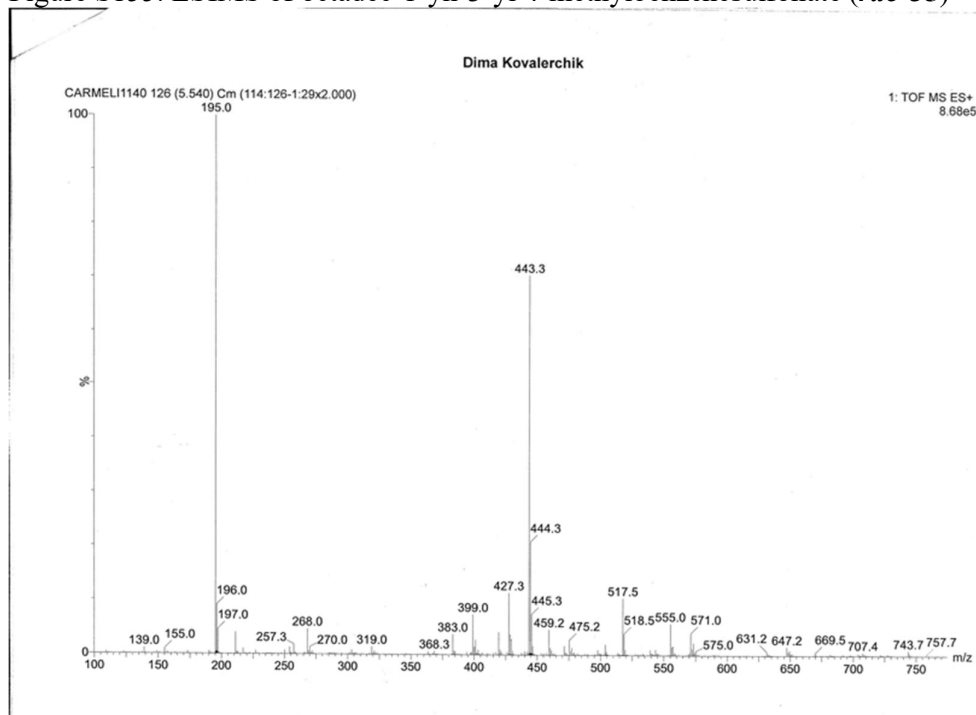

Figure S156. HRESIMS of octadec-1-yn-3-yl 4-methylbenzenesulfonate (*rac*-35)

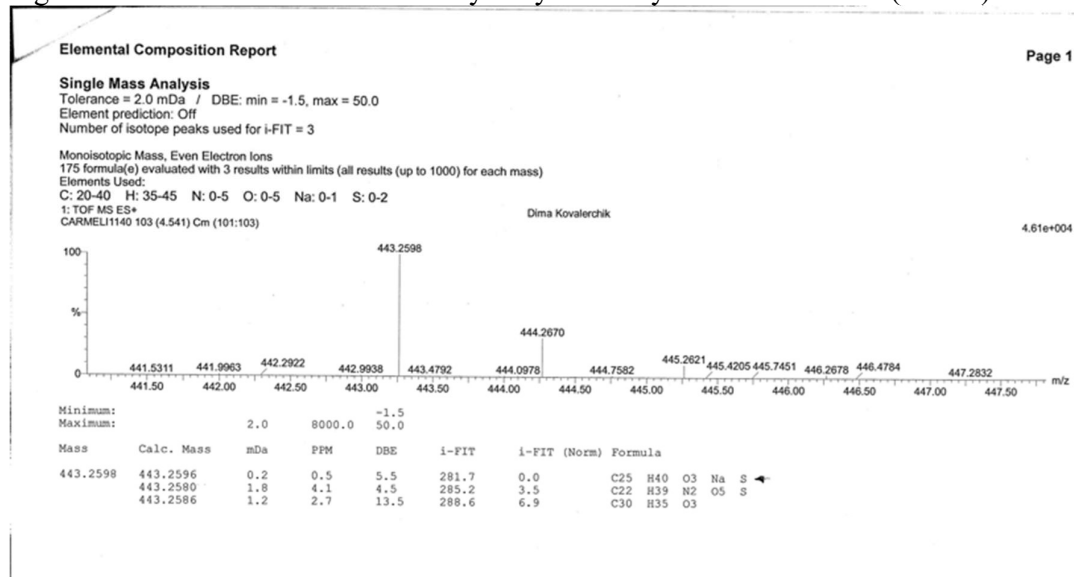



Figure S159. SMBEIMS of 3-chlorooctadec-1-yne (*rac*-36)

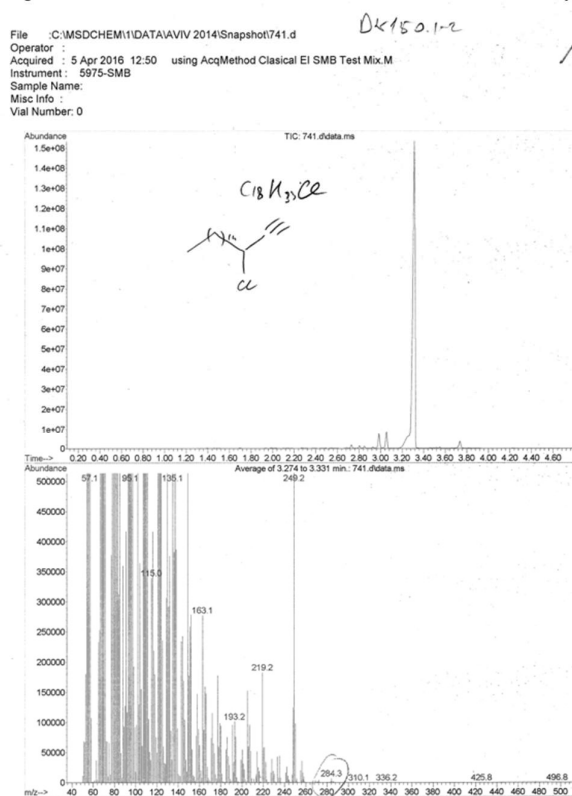

Figure S160. HRESIMS of 3-chlorooctadec-1-yne (*rac*-36)

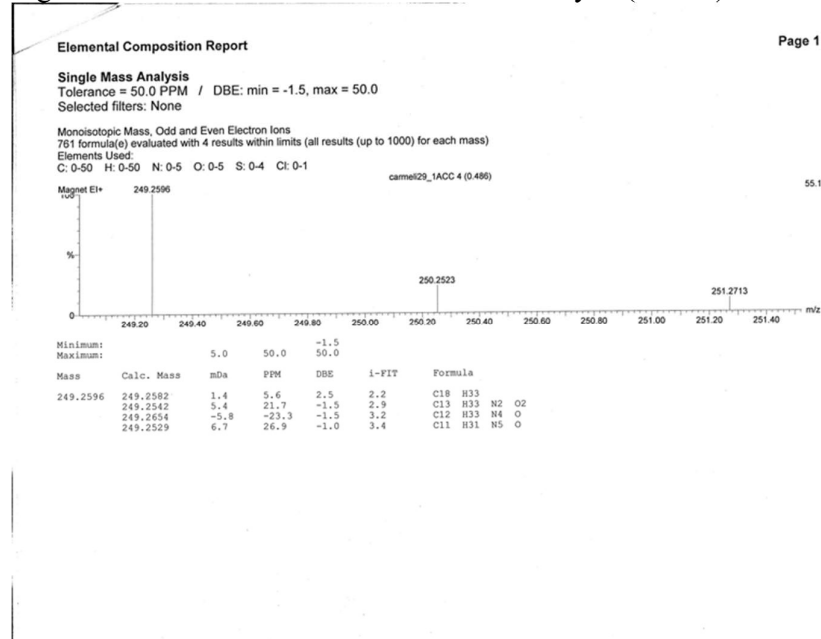

Figure S161.  $^1\text{H}$  NMR spectrum of octadec-1-yn-3-amine (*rac*-37) in  $\text{CDCl}_3$

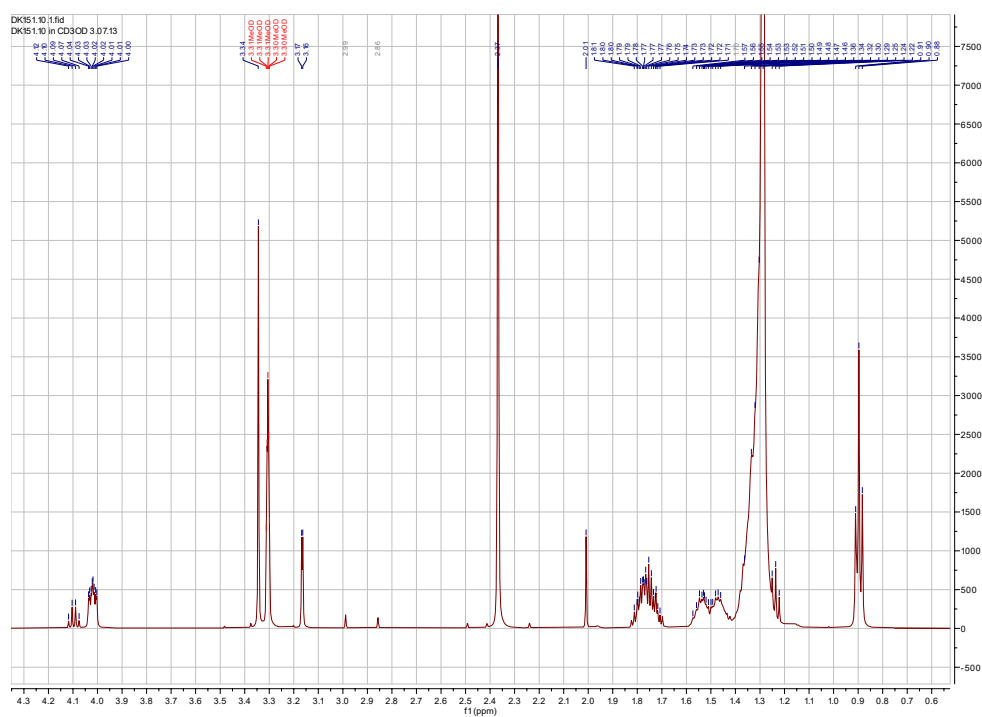

Figure S162.  $^{13}\text{C}$  NMR spectrum of octadec-1-yn-3-amine (*rac*-37) in  $\text{CDCl}_3$

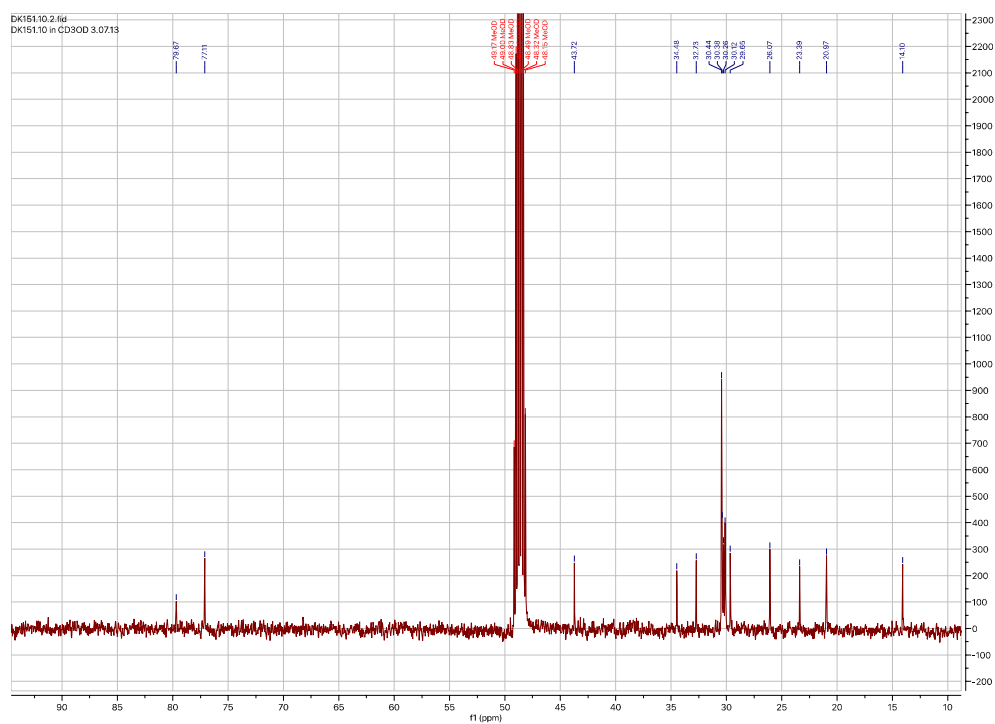

Figure S163. ESIMS of octadec-1-yn-3-amine (*rac*-37)

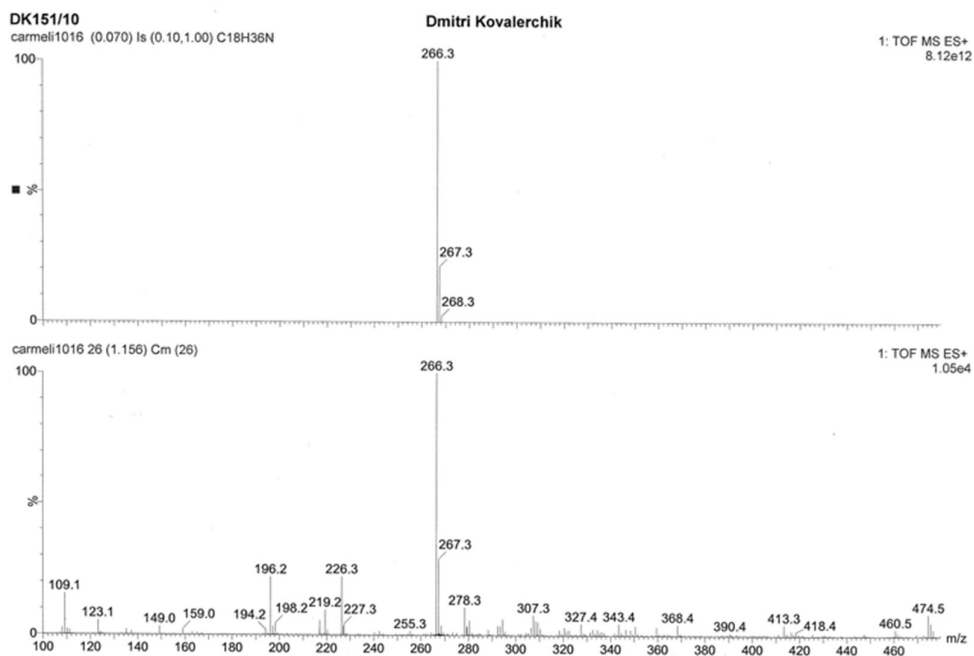

Figure S164. HRESIMS of octadec-1-yn-3-amine (*rac*-37)

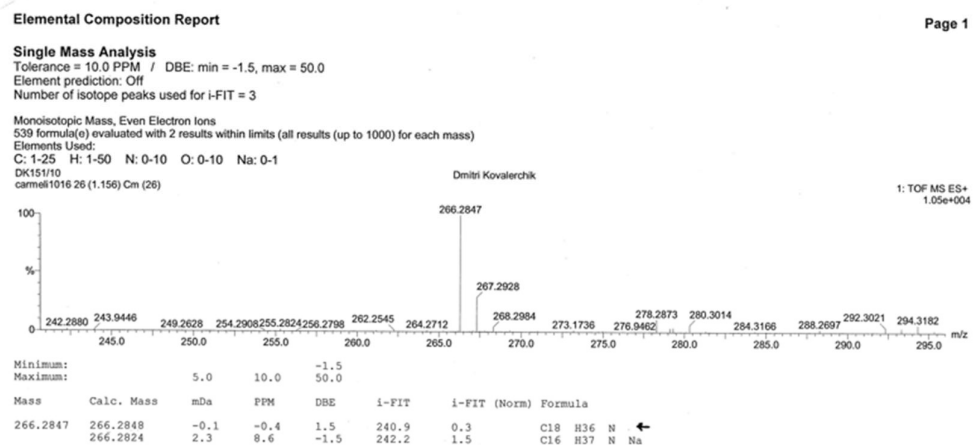

Figure S165.  $^1\text{H}$  NMR spectrum of 3-methoxyoctadec-1-yne (*rac*-**38**) in  $\text{CDCl}_3$

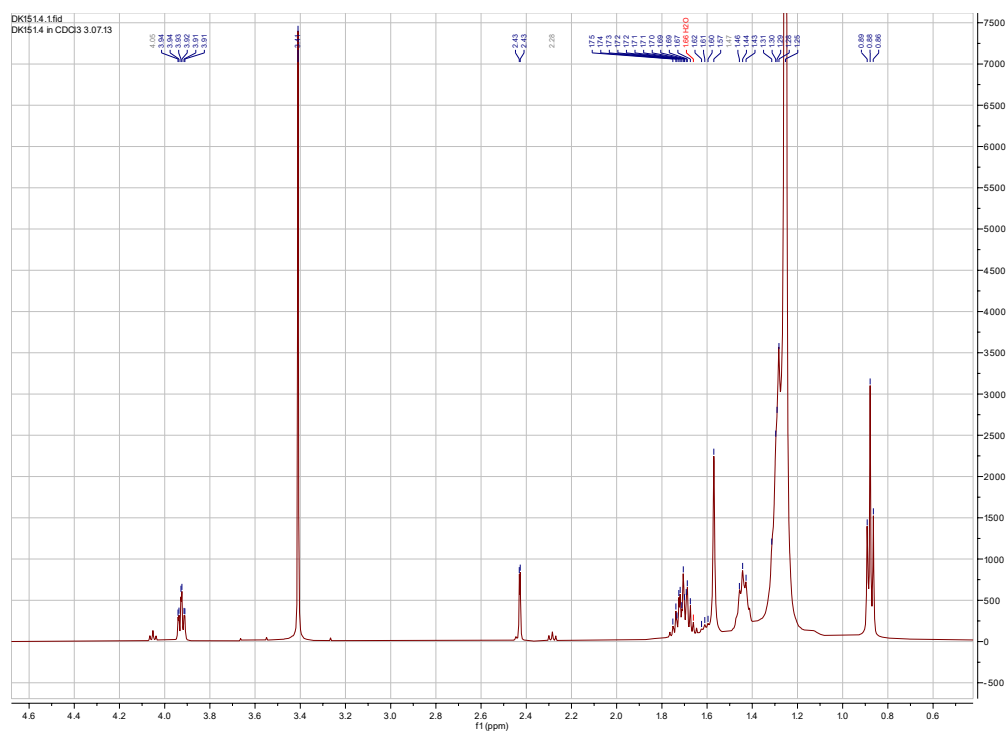

Figure S166.  $^1\text{H}$  NMR spectrum of 3-methoxyoctadec-1-yne (*rac*-**38**) in  $\text{CDCl}_3$

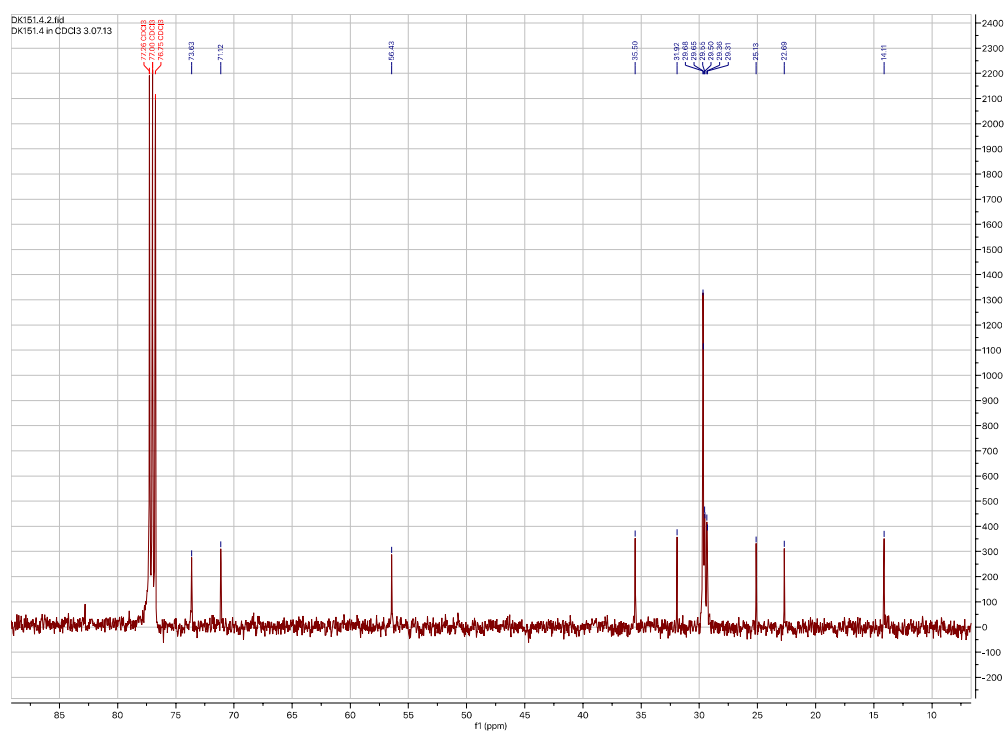



Figure S167. EIGCMS of 3-methoxyoctadec-1-yne (*rac*-38)

File :C:\msdchem\1\data\Aviv 2014\777.D  
Operator :  
Acquired : 9 May 2016 13:32 using AcqMethod COLD EI 70 eV Organics.M  
Instrument : 5975-SMB  
Sample Name:  
Misc Info : Dima DK15134 C19H36O MW 280  
Vial Number: 0

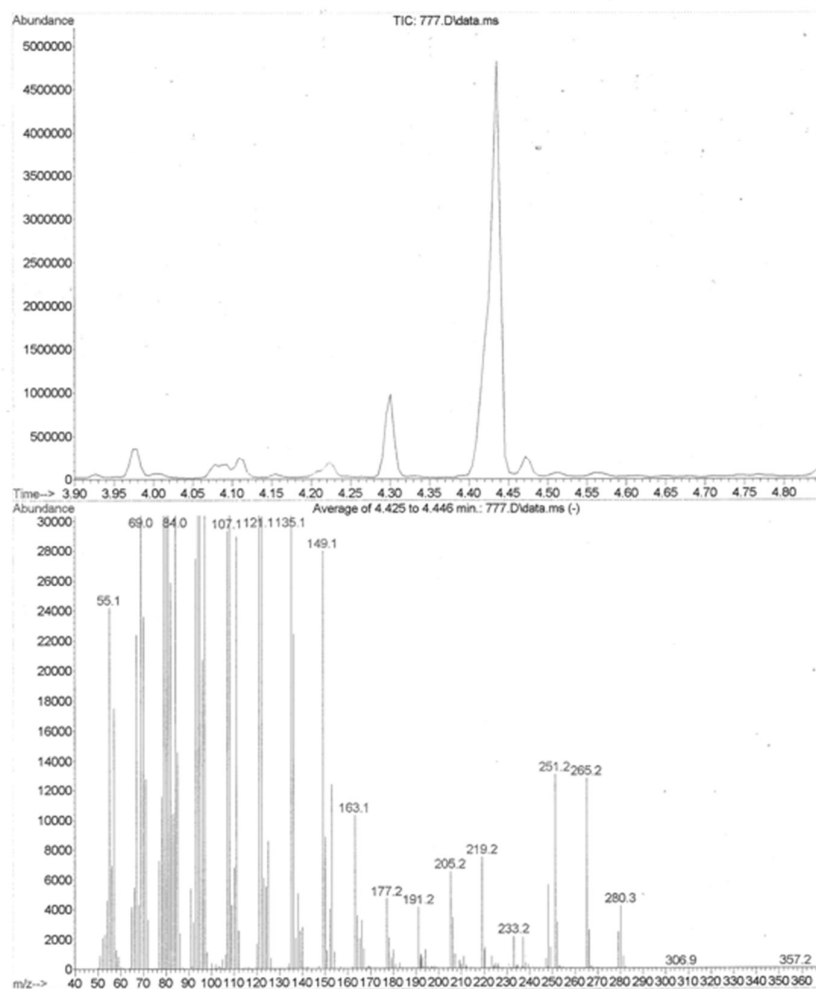

Figure S168.  $^1\text{H}$  NMR spectrum of *S*-octadec-1-yn-3-yl ethanethioate (*rac*-39) in  $\text{CDCl}_3$

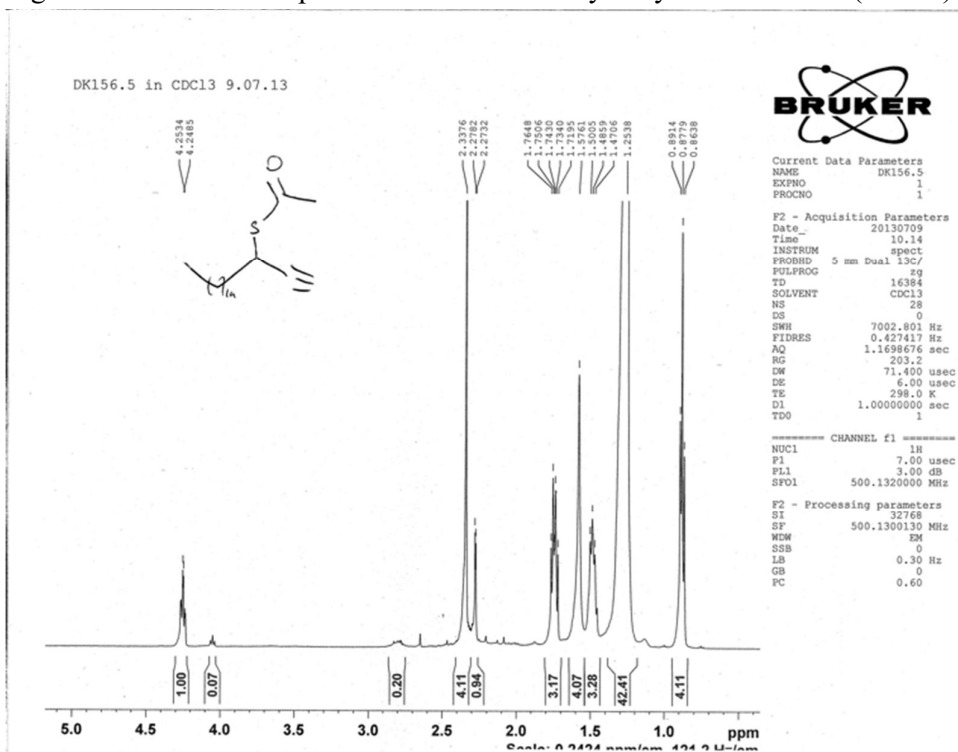

Figure S169.  $^{13}\text{C}$  NMR spectrum of *S*-octadec-1-yn-3-yl ethanethioate (*rac*-39) in  $\text{CDCl}_3$

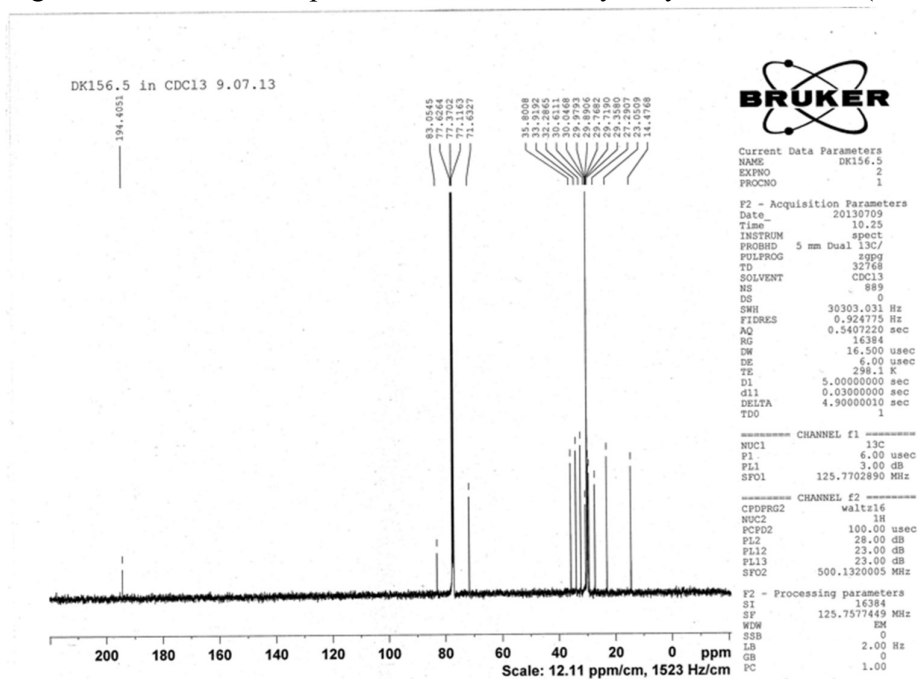

Figure S170. ESIMS of *S*-octadec-1-yn-3-yl ethanethioate (*rac*-39)

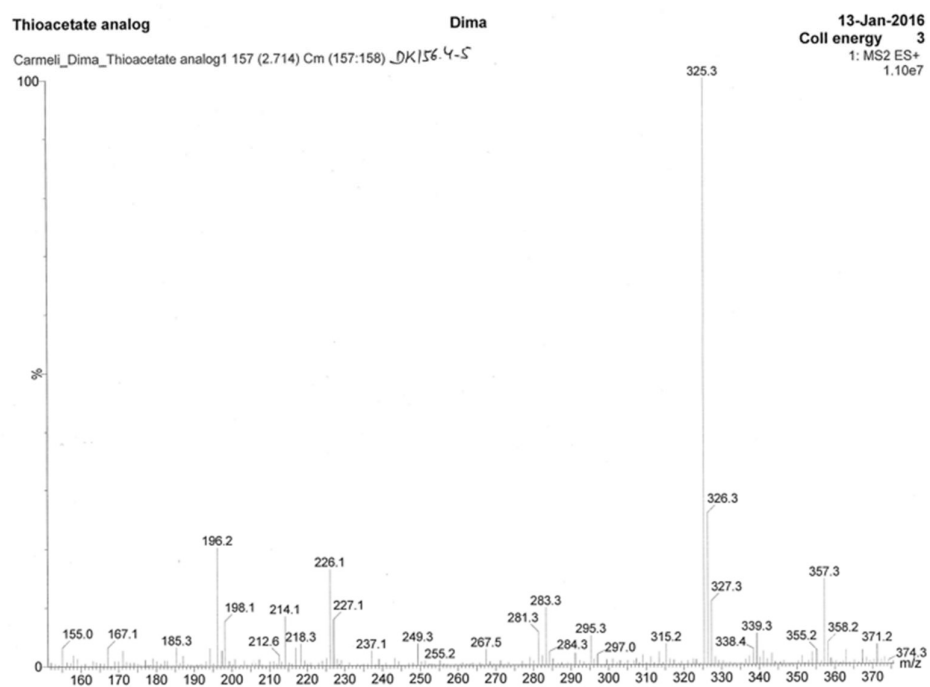

[illegible]

Figure S173.  $^1\text{H}$  NMR spectrum of 3-methylnonadec-1-yn-3-ol (*rac*-41) in  $\text{CDCl}_3$

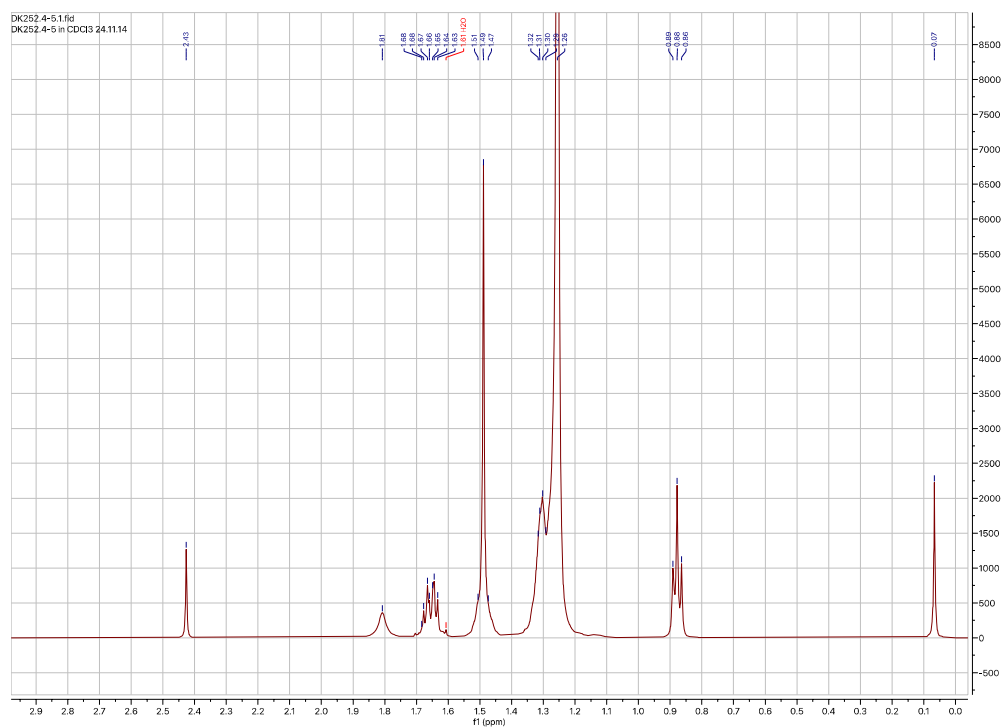

Figure S174.  $^{13}\text{C}$  NMR spectrum of 3-methylnonadec-1-yn-3-ol (*rac*-41) in  $\text{CDCl}_3$

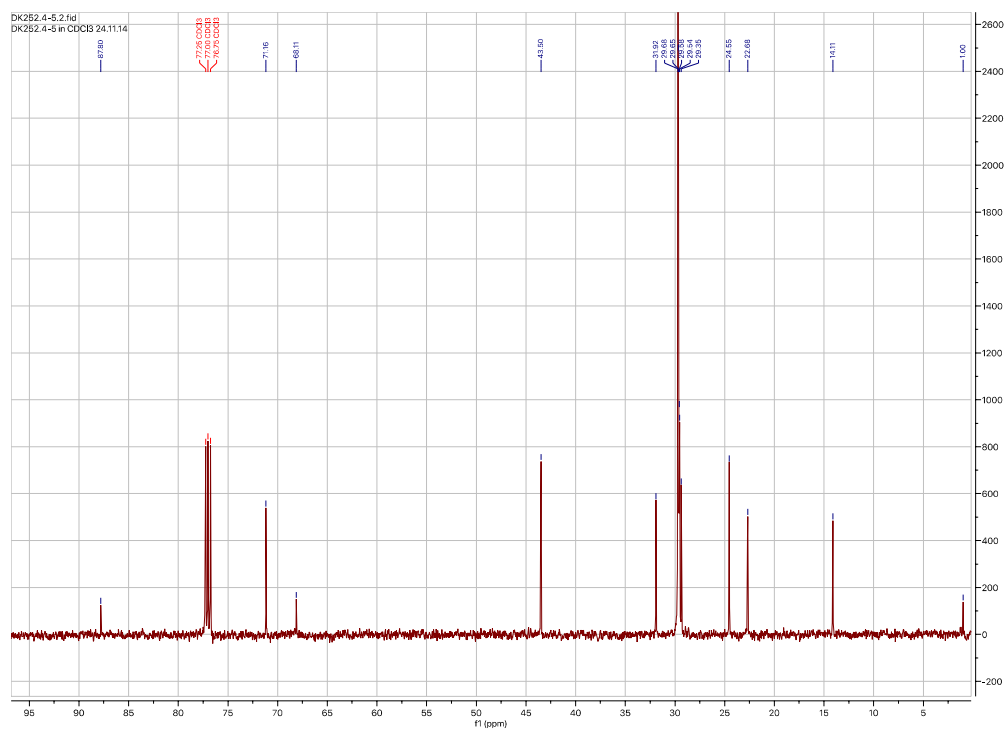

Figure S175. HRCIMS of 3-methylnonadec-1-yn-3-ol (*rac*-41)

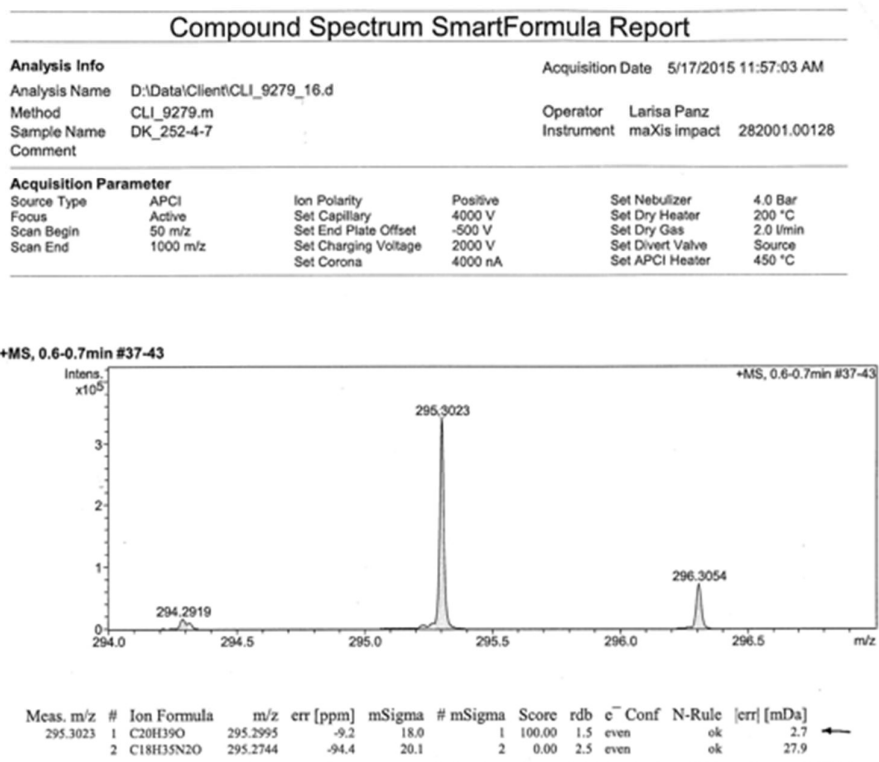

<sup>1</sup>H NMR spectrum (CDCl<sub>3</sub>) of compound 10j. The spectrum displays several peaks corresponding to different proton environments:

- A triplet at ~0.9 ppm (integration: 3.00).
- A singlet at ~1.2 ppm (integration: 3.00).
- Multiplets between 1.6 and 1.8 ppm (integrations: 1.00, 1.00, 1.00, 1.00, 1.00).
- A doublet at ~4.3 ppm (integration: 2.00).

DK253.4-722.fid  
DK253.4-7 in CDCl3 24.11.14

7.85 CDCl3  
7.76 CDCl3  
7.75 CDCl3  
7.75 CDCl3

6.25

3.85

3.191  
3.068  
3.067  
3.066  
3.035  
3.034  
2.929  
2.928

2.58

2.268

1.50

0.51  
0.99

f1 (ppm)

Figure S178. HRCIMS of henicos-2-yn-4-ol (*rac*-42)

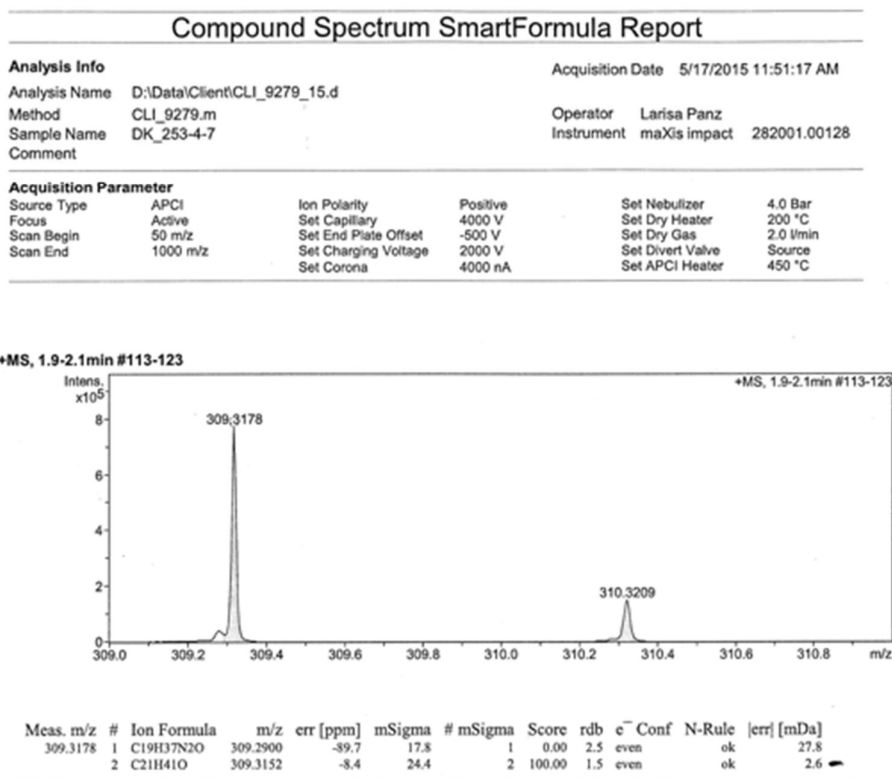



DK315.1.fid  
DK315 in CDCl3, 18.04

7.27, 7.25, 7.23, 7.21, 7.19, 7.17, 7.15, 7.13, 7.11, 7.09, 7.07, 7.05, 7.03, 7.01, 6.99, 6.97, 6.95, 6.93, 6.91, 6.89, 6.87, 6.85, 6.83, 6.81, 6.79, 6.77, 6.75, 6.73, 6.71, 6.69, 6.67, 6.65, 6.63, 6.61, 6.59, 6.57, 6.55, 6.53, 6.51, 6.49, 6.47, 6.45, 6.43, 6.41, 6.39, 6.37, 6.35, 6.33, 6.31, 6.29, 6.27, 6.25, 6.23, 6.21, 6.19, 6.17, 6.15, 6.13, 6.11, 6.09, 6.07, 6.05, 6.03, 6.01, 5.99, 5.97, 5.95, 5.93, 5.91, 5.89, 5.87, 5.85, 5.83, 5.81, 5.79, 5.77, 5.75, 5.73, 5.71, 5.69, 5.67, 5.65, 5.63, 5.61, 5.59, 5.57, 5.55, 5.53, 5.51, 5.49, 5.47, 5.45, 5.43, 5.41, 5.39, 5.37, 5.35, 5.33, 5.31, 5.29, 5.27, 5.25, 5.23, 5.21, 5.19, 5.17, 5.15, 5.13, 5.11, 5.09, 5.07, 5.05, 5.03, 5.01, 5.00, 4.99, 4.97, 4.95, 4.93, 4.91, 4.89, 4.87, 4.85, 4.83, 4.81, 4.79, 4.77, 4.75, 4.73, 4.71, 4.69, 4.67, 4.65, 4.63, 4.61, 4.59, 4.57, 4.55, 4.53, 4.51, 4.49, 4.47, 4.45, 4.43, 4.41, 4.39, 4.37, 4.35, 4.33, 4.31, 4.29, 4.27, 4.25, 4.23, 4.21, 4.19, 4.17, 4.15, 4.13, 4.11, 4.09, 4.07, 4.05, 4.03, 4.01, 4.00, 3.99, 3.97, 3.95, 3.93, 3.91, 3.89, 3.87, 3.85, 3.83, 3.81, 3.79, 3.77, 3.75, 3.73, 3.71, 3.69, 3.67, 3.65, 3.63, 3.61, 3.59, 3.57, 3.55, 3.53, 3.51, 3.49, 3.47, 3.45, 3.43, 3.41, 3.39, 3.37, 3.35, 3.33, 3.31, 3.29, 3.27, 3.25, 3.23, 3.21, 3.19, 3.17, 3.15, 3.13, 3.11, 3.09, 3.07, 3.05, 3.03, 3.01, 3.00, 2.99, 2.97, 2.95, 2.93, 2.91, 2.89, 2.87, 2.85, 2.83, 2.81, 2.79, 2.77, 2.75, 2.73, 2.71, 2.69, 2.67, 2.65, 2.63, 2.61, 2.59, 2.57, 2.55, 2.53, 2.51, 2.49, 2.47, 2.45, 2.43, 2.41, 2.39, 2.37, 2.35, 2.33, 2.31, 2.29, 2.27, 2.25, 2.23, 2.21, 2.19, 2.17, 2.15, 2.13, 2.11, 2.09, 2.07, 2.05, 2.03, 2.01, 2.00, 1.99, 1.97, 1.95, 1.93, 1.91, 1.89, 1.87, 1.85, 1.83, 1.81, 1.79, 1.77, 1.75, 1.73, 1.71, 1.69, 1.67, 1.65, 1.63, 1.61, 1.59, 1.57, 1.55, 1.53, 1.51, 1.49, 1.47, 1.45, 1.43, 1.41, 1.39, 1.37, 1.35, 1.33, 1.31, 1.29, 1.27, 1.25, 1.23, 1.21, 1.19, 1.17, 1.15, 1.13, 1.11, 1.09, 1.07, 1.05, 1.03, 1.01, 1.00, 0.99, 0.97, 0.95, 0.93, 0.91, 0.89, 0.87, 0.85, 0.83, 0.81, 0.79, 0.77, 0.75, 0.73, 0.71, 0.69, 0.67, 0.65, 0.63, 0.61, 0.59, 0.57, 0.55, 0.53, 0.51, 0.49, 0.47, 0.45, 0.43, 0.41, 0.39, 0.37, 0.35, 0.33, 0.31, 0.29, 0.27, 0.25, 0.23, 0.21, 0.19, 0.17, 0.15, 0.13, 0.11, 0.09, 0.07, 0.05, 0.03, 0.01, 0.00

0.97, 0.95, 0.93, 0.91, 0.89, 0.87, 0.85, 0.83, 0.81, 0.79, 0.77, 0.75, 0.73, 0.71, 0.69, 0.67, 0.65, 0.63, 0.61, 0.59, 0.57, 0.55, 0.53, 0.51, 0.49, 0.47, 0.45, 0.43, 0.41, 0.39, 0.37, 0.35, 0.33, 0.31, 0.29, 0.27, 0.25, 0.23, 0.21, 0.19, 0.17, 0.15, 0.13, 0.11, 0.09, 0.07, 0.05, 0.03, 0.01, 0.00

1.11, 1.09, 1.07, 1.05, 1.03, 1.01, 0.99, 0.97, 0.95, 0.93, 0.91, 0.89, 0.87, 0.85, 0.83, 0.81, 0.79, 0.77, 0.75, 0.73, 0.71, 0.69, 0.67, 0.65, 0.63, 0.61, 0.59, 0.57, 0.55, 0.53, 0.51, 0.49, 0.47, 0.45, 0.43, 0.41, 0.39, 0.37, 0.35, 0.33, 0.31, 0.29, 0.27, 0.25, 0.23, 0.21, 0.19, 0.17, 0.15, 0.13, 0.11, 0.09, 0.07, 0.05, 0.03, 0.01, 0.00

2.00, 1.99, 1.98, 1.97, 1.96, 1.95, 1.94, 1.93, 1.92, 1.91, 1.90, 1.89, 1.88, 1.87, 1.86, 1.85, 1.84, 1.83, 1.82, 1.81, 1.80, 1.79, 1.78, 1.77, 1.76, 1.75, 1.74, 1.73, 1.72, 1.71, 1.70, 1.69, 1.68, 1.67, 1.66, 1.65, 1.64, 1.63, 1.62, 1.61, 1.60, 1.59, 1.58, 1.57, 1.56, 1.55, 1.54, 1.53, 1.52, 1.51, 1.50, 1.49, 1.48, 1.47, 1.46, 1.45, 1.44, 1.43, 1.42, 1.41, 1.40, 1.39, 1.38, 1.37, 1.36, 1.35, 1.34, 1.33, 1.32, 1.31, 1.30, 1.29, 1.28, 1.27, 1.26, 1.25, 1.24, 1.23, 1.22, 1.21, 1.20, 1.19, 1.18, 1.17, 1.16, 1.15, 1.14, 1.13, 1.12, 1.11, 1.10, 1.09, 1.08, 1.07, 1.06, 1.05, 1.04, 1.03, 1.02, 1.01, 1.00, 0.99, 0.98, 0.97, 0.96, 0.95, 0.94, 0.93, 0.92, 0.91, 0.90, 0.89, 0.88, 0.87, 0.86, 0.85, 0.84, 0.83, 0.82, 0.81, 0.80, 0.79, 0.78, 0.77, 0.76, 0.75, 0.74, 0.73, 0.72, 0.71, 0.70, 0.69, 0.68, 0.67, 0.66, 0.65, 0.64, 0.63, 0.62, 0.61, 0.60, 0.59, 0.58, 0.57, 0.56, 0.55, 0.54, 0.53, 0.52, 0.51, 0.50, 0.49, 0.48, 0.47, 0.46, 0.45, 0.44, 0.43, 0.42, 0.41, 0.40, 0.39, 0.38, 0.37, 0.36, 0.35, 0.34, 0.33, 0.32, 0.

[illegible]

Figure S181. HREIMS of 1-(3-tetradecylphenyl)prop-2-yn-1-ol (*rac*-45)

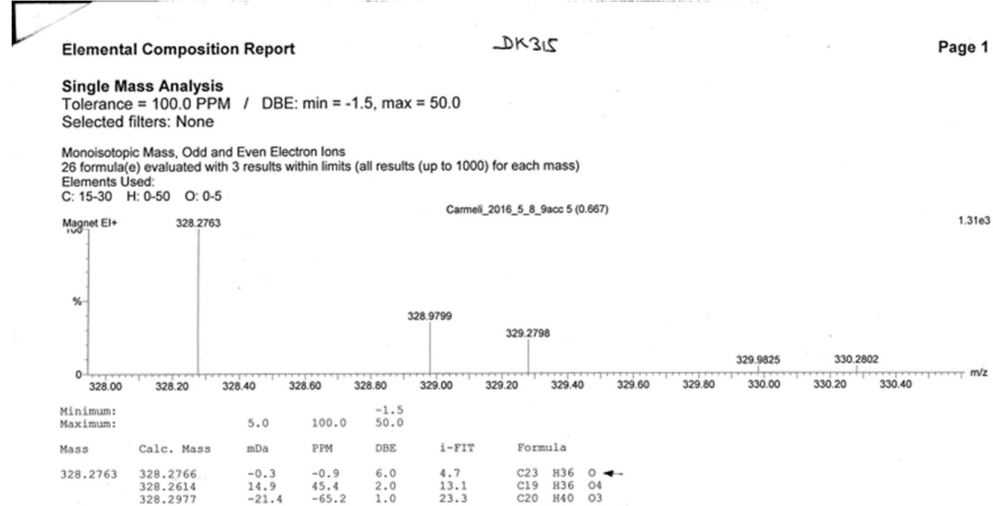

Figure S182.  $^1\text{H}$  NMR spectrum of 1-(2-tetradecylphenyl)prop-2-yn-1-ol (*rac*-48) in  $\text{CDCl}_3$

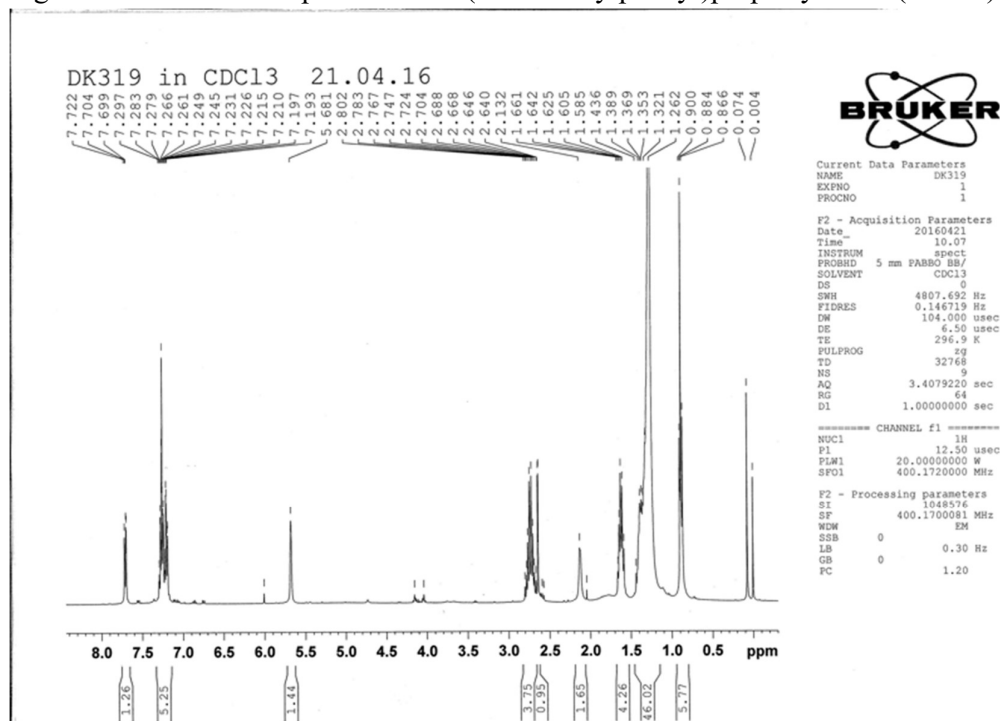

Figure S183.  $^{13}\text{C}$  NMR spectrum of 1-(2-tetradecylphenyl)prop-2-yn-1-ol (*rac*-48) in  $\text{CDCl}_3$

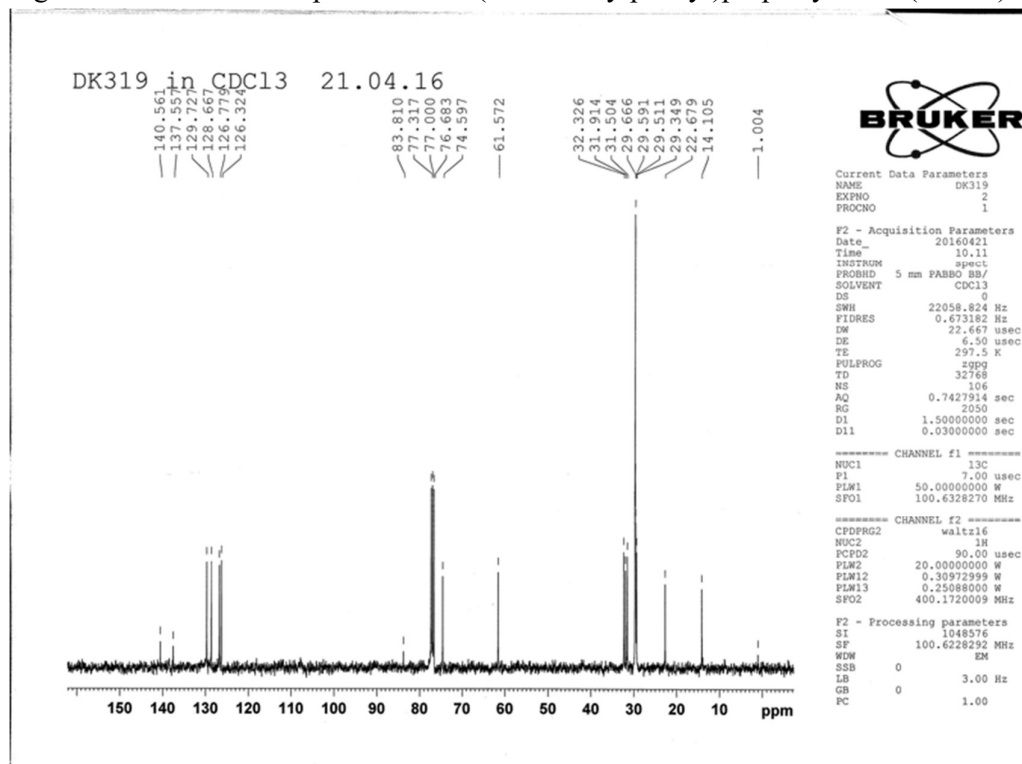

Figure S184. HREIMS of 1-(2-tetradecylphenyl)prop-2-yn-1-ol (*rac*-48)

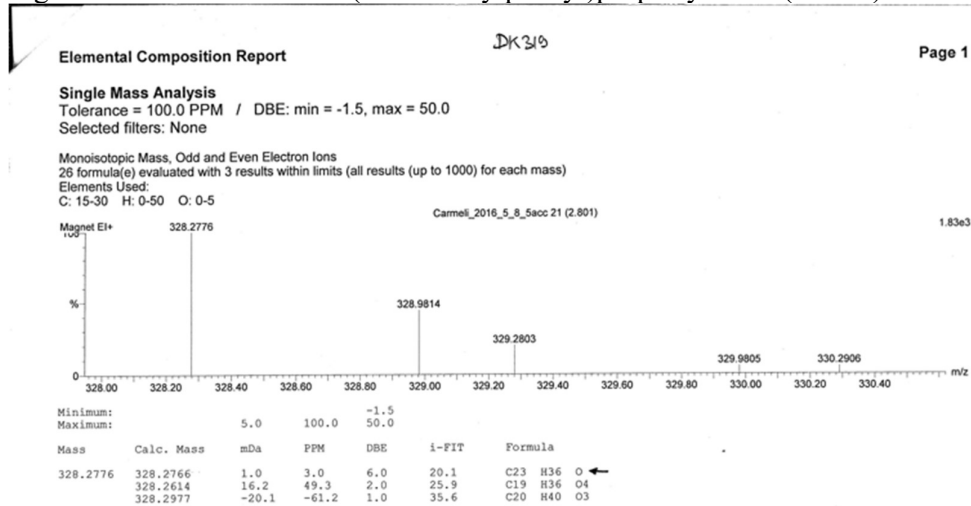

Figure S185.  $^1\text{H}$  NMR spectrum of 1-phenylprop-2-yn-1-ol (*rac*-49) in  $\text{CDCl}_3$

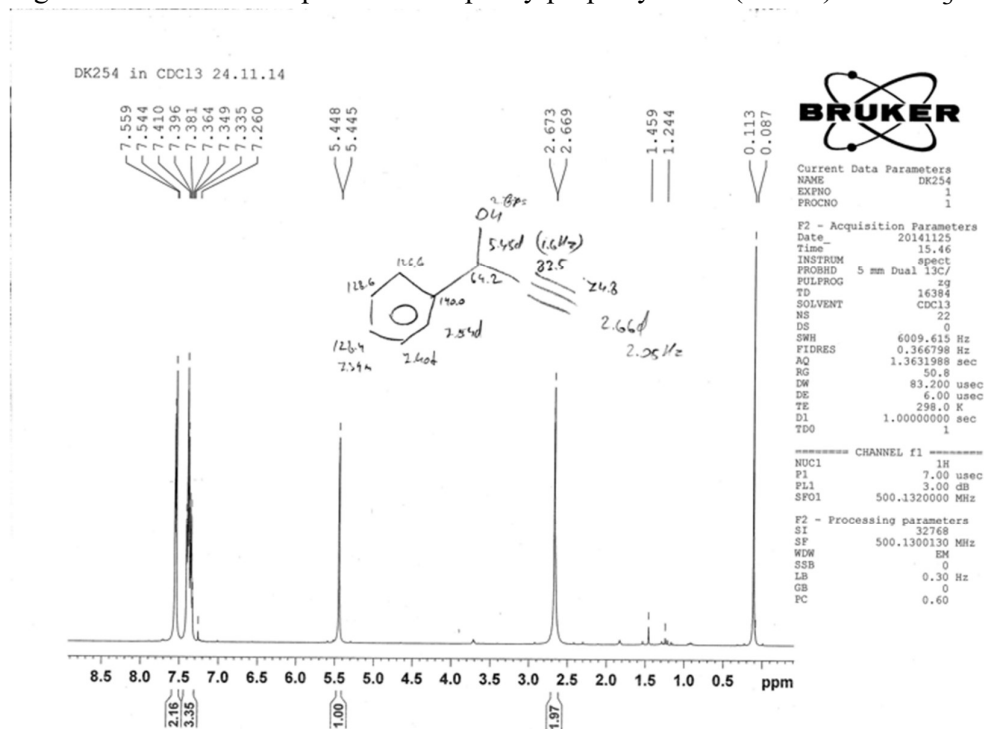

Figure S186.  $^{13}\text{C}$  NMR spectrum of 1-phenylprop-2-yn-1-ol (*rac*-49) in  $\text{CDCl}_3$

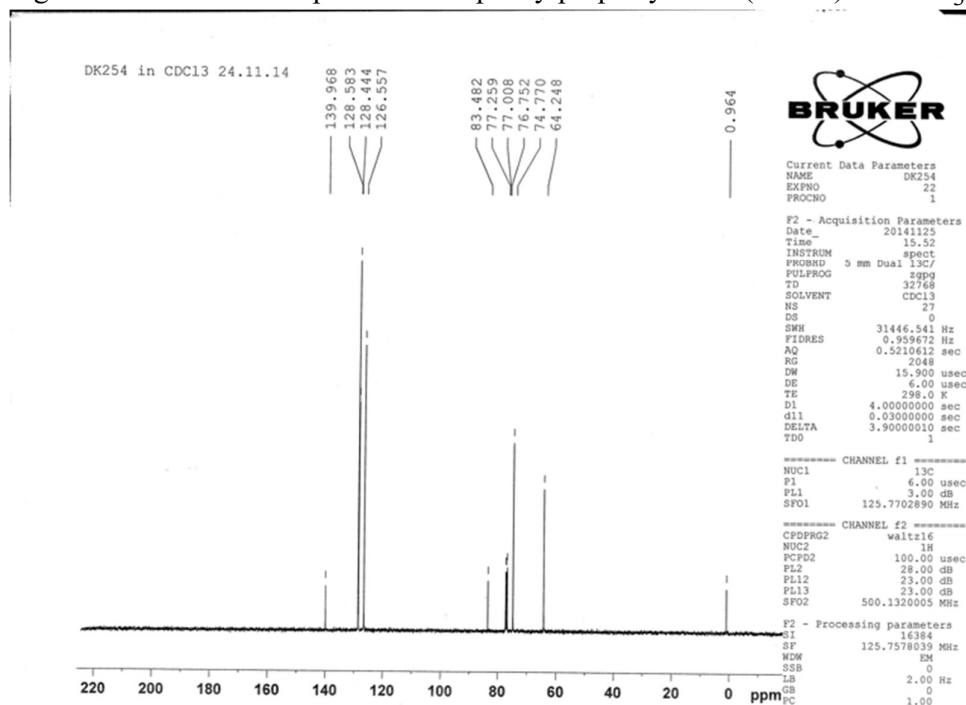

Figure S187. HREIMS of 1-phenylprop-2-yn-1-ol (*rac*-49)

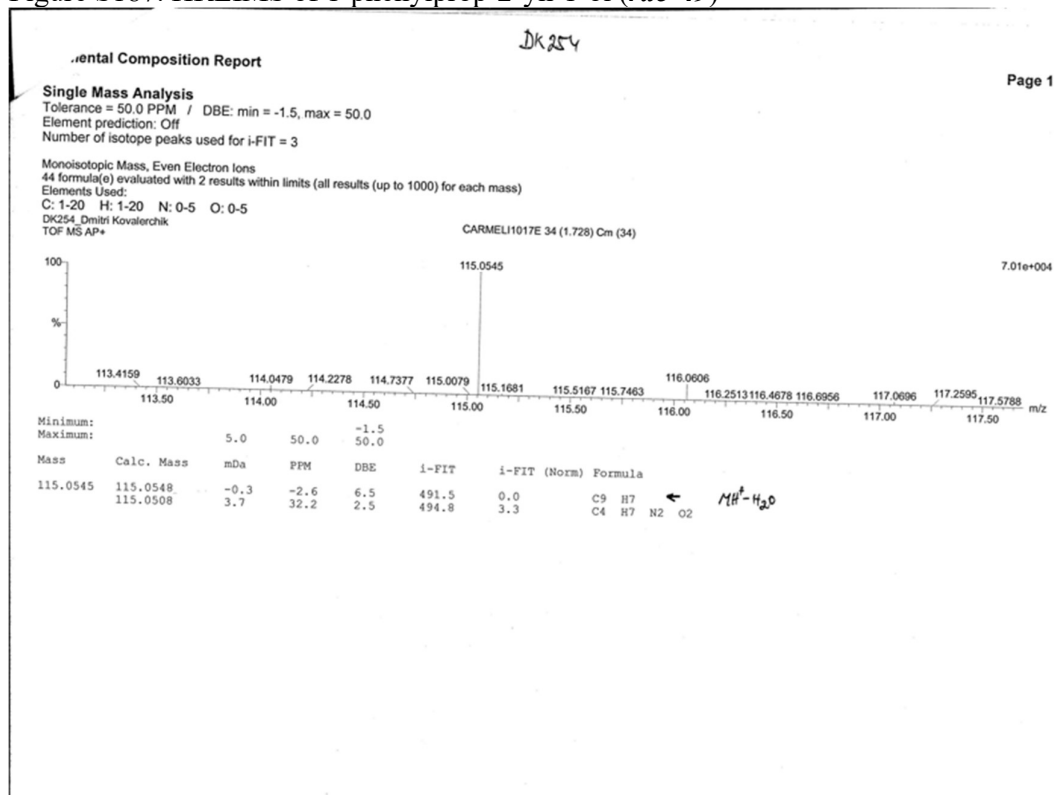

Figure S188. Dose response curves of the compounds described in Table 1 obtained from screening of NSCLC U-1810 cells or diploid fibroblast WI-38 cells are presented. The IC<sub>50</sub> values were deduced from the cell viability curves.

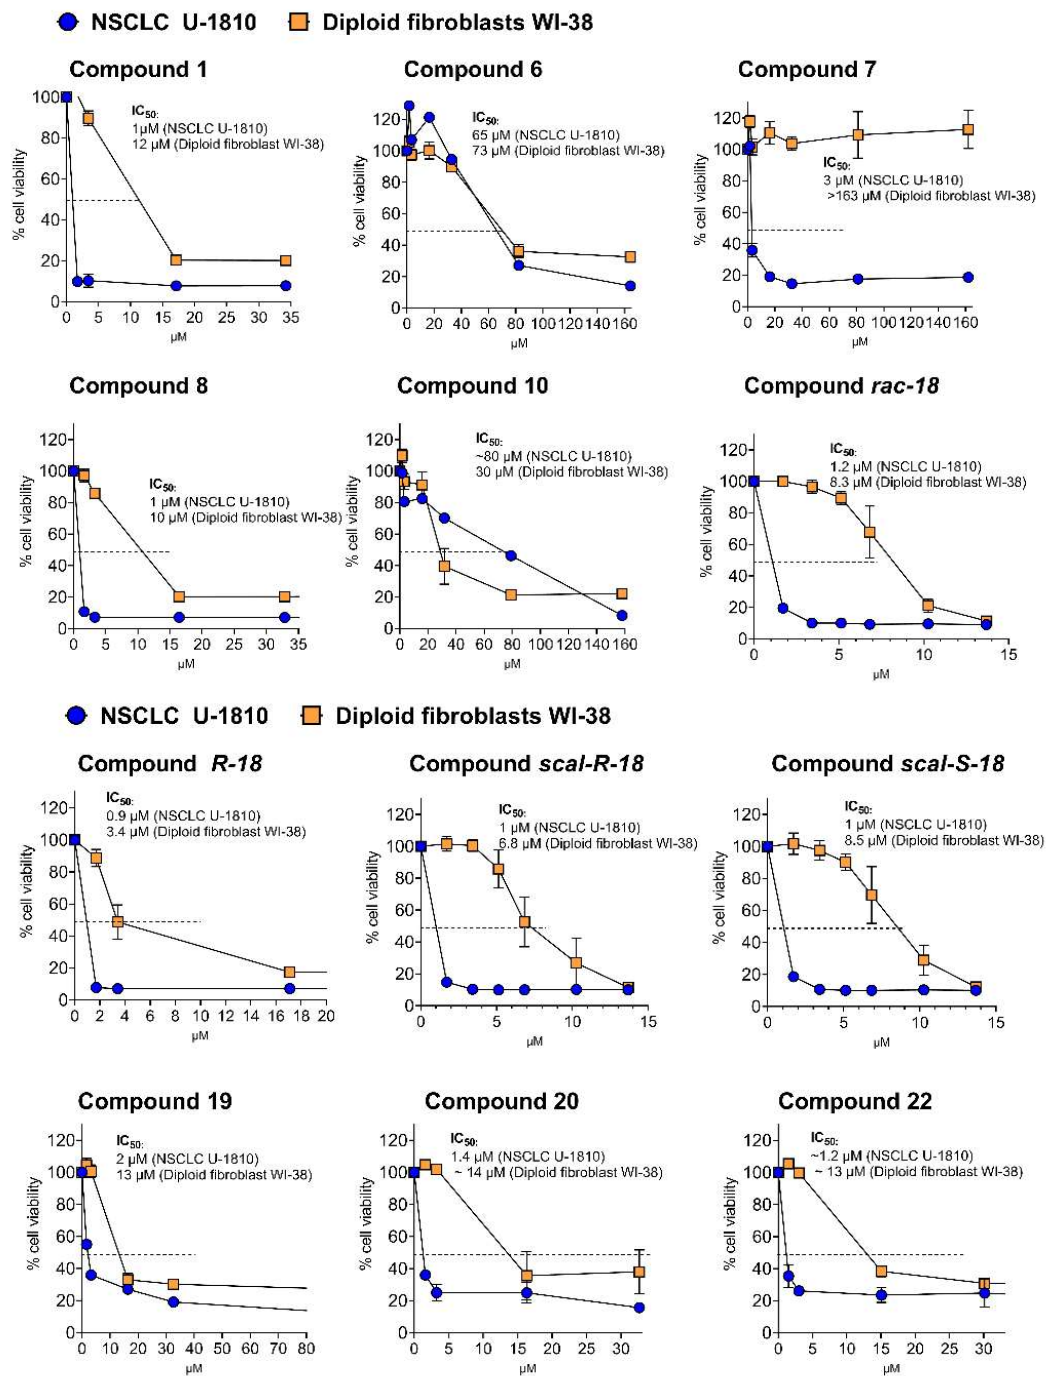

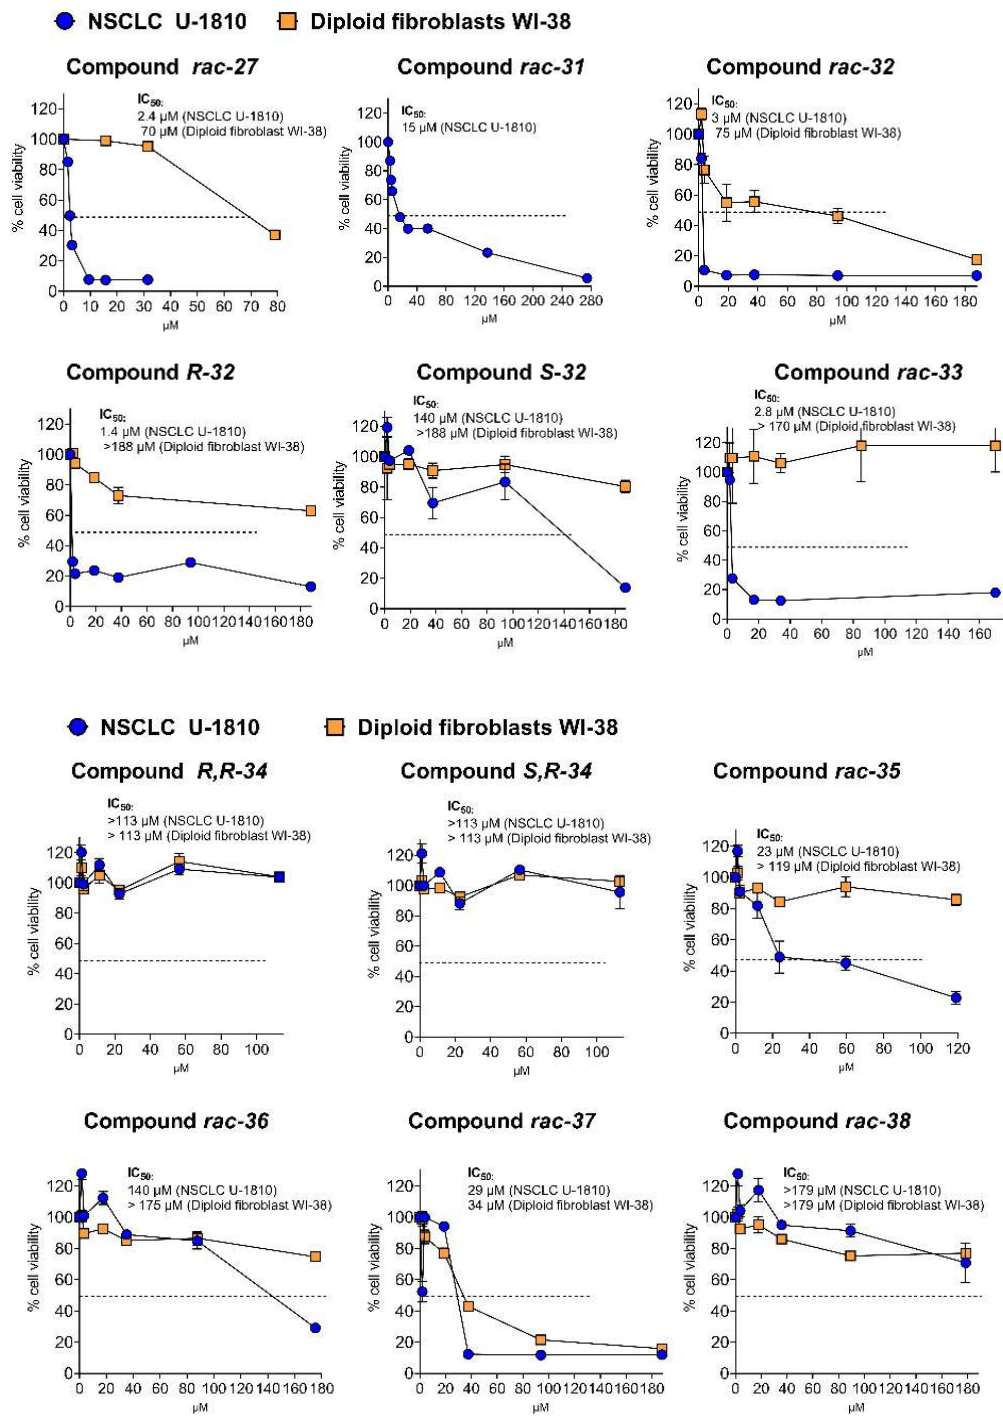



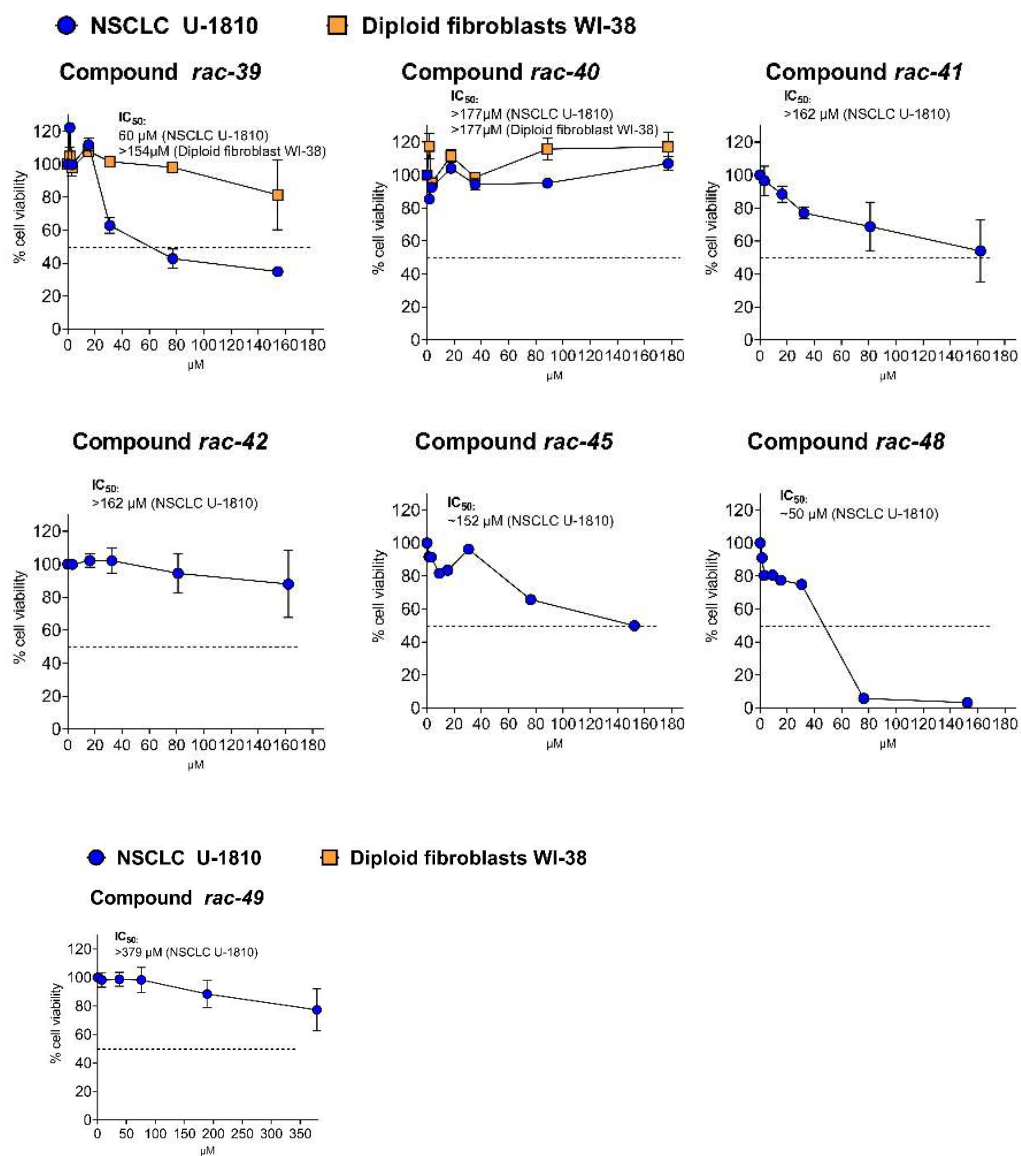

Supplement: s1 [file s1]
